# Supplementary material for: The Identification and Analysis of a Novel Model Based on Ferroptosis-Related Genes for Predicting the Prognosis of Diffuse Large B-Cell Lymphomas
Source: Research Square preprint supplement (doi:10.21203/rs.3.rs-1119694/v1), 2021-12-09
Supplement: Supplementary file 1 [file 59f981a8783f09bb1561f7ed.csv]

	ONTOLOGY	ID	Description	GeneRatio	BgRatio	pvalue	p.adjust	qvalue	geneID	Count
GO:0050804	BP	GO:0050804	modulation of chemical synaptic transmission	53/1114	454/18866	1.64349568259534e-06	0.00471182196455791	0.00458539990076171	ACHE/ADCYAP1/AGER/ANAPC2/APBA1/ARF1/ARRB2/BRSK1/CA2/CA7/CACNB2/CNTNAP4/CPLX1/CRHR2/DGKZ/DISC1/DLGAP4/DMPK/EFNB3/EGFR/GDNF/GRIN1/GRM4/GRM6/GUCY1A1/HAP1/HRH2/ITPR3/KCTD13/MIR142/MPP2/NFATC4/NMU/P2RY4/PPFIA3/PPP1R9B/PRKACA/PTK2B/RASGRF1/S100B/SLC30A1/SLC4A8/SRC/STAR/STX1A/STXBP5L/SYN1/SYP/SYT1/TNR/UCN/VAMP2/VGF	53
GO:0099177	BP	GO:0099177	regulation of trans-synaptic signaling	53/1114	455/18866	1.7565039942434e-06	0.00471182196455791	0.00458539990076171	ACHE/ADCYAP1/AGER/ANAPC2/APBA1/ARF1/ARRB2/BRSK1/CA2/CA7/CACNB2/CNTNAP4/CPLX1/CRHR2/DGKZ/DISC1/DLGAP4/DMPK/EFNB3/EGFR/GDNF/GRIN1/GRM4/GRM6/GUCY1A1/HAP1/HRH2/ITPR3/KCTD13/MIR142/MPP2/NFATC4/NMU/P2RY4/PPFIA3/PPP1R9B/PRKACA/PTK2B/RASGRF1/S100B/SLC30A1/SLC4A8/SRC/STAR/STX1A/STXBP5L/SYN1/SYP/SYT1/TNR/UCN/VAMP2/VGF	53
GO:0034765	BP	GO:0034765	regulation of ion transmembrane transport	55/1114	489/18866	3.30188905286297e-06	0.00590487825620327	0.00574644550954397	ACE2/ACTN2/AKAP6/AKT1/ANO9/ARF1/BDKRB1/CACNA1H/CACNA1I/CACNB2/CACNG6/CASQ1/CFTR/DPP6/FLNA/FXYD3/GRIA4/GRIN1/HAP1/IL13/KCNA3/KCNAB3/KCNB2/KCND1/KCNF1/KCNIP2/KCNIP3/KCNK16/KCNMB1/KCNQ1/KCNS1/LRRC52/NOS1/NOX1/OPRL1/OPRM1/PIRT/PLN/PM20D1/PRKACA/PTK2B/RASGRF1/RNF207/S100A1/SCN2B/SCN3B/SLC30A1/SLN/THBS1/TMC2/TMEM109/TPCN1/TSPAN13/VAMP2/WNK4	55
GO:0010959	BP	GO:0010959	regulation of metal ion transport	46/1114	396/18866	9.00588445593284e-06	0.0101601327705001	0.00988752804074761	ACTN2/ADCYAP1/AKAP6/AKT1/ARF1/ARRB2/BDKRB1/BEST1/CACNB2/CACNG6/CASQ1/DMPK/DPP6/FLNA/FXYD3/GJA1/GRIN1/GRM6/HAP1/IL13/KCNAB3/KCNIP2/KCNIP3/KCNMB1/KCNQ1/KCNS1/LRRC52/MLLT6/NOS1/OPRL1/P2RY12/PLN/PLPP4/PRKACA/PTK2B/RNF207/S100A1/SCN2B/SCN3B/SLC30A1/SLN/TMC2/TSPAN13/UCN/VAMP2/WNK4	46
GO:1903522	BP	GO:1903522	regulation of blood circulation	38/1114	303/18866	9.46890286160306e-06	0.0101601327705001	0.00988752804074761	ACE2/AGER/AKT1/APLN/ATP1A3/CACNA1H/CACNB2/CACNG6/CASQ1/DMPK/ECE1/EGFR/FGA/FLNA/FXYD3/GJA1/GRK2/GSK3A/HRH2/ITPR3/KCND1/KCNIP2/KCNIP3/KCNK1/KCNMB2/KCNQ1/MYH7/NMU/NOS1/NPFF/PLN/PRKACA/RNF207/S100A1/SCN2B/SCN3B/TNNI3/UCN	38
GO:1904062	BP	GO:1904062	regulation of cation transmembrane transport	41/1114	349/18866	2.09005210509904e-05	0.0186885492397606	0.0181871200724408	ACE2/ACTN2/AKAP6/ARF1/BDKRB1/CACNB2/CACNG6/CASQ1/DPP6/FLNA/FXYD3/GRIA4/GRIN1/HAP1/IL13/KCNAB3/KCNIP2/KCNIP3/KCNMB1/KCNQ1/KCNS1/LRRC52/NOS1/OPRL1/OPRM1/PIRT/PLN/PM20D1/PRKACA/PTK2B/RASGRF1/RNF207/S100A1/SCN2B/SCN3B/SLC30A1/SLN/TMC2/TSPAN13/VAMP2/WNK4	41
GO:0035637	BP	GO:0035637	multicellular organismal signaling	28/1114	206/18866	3.24971409559087e-05	0.02490673731835	0.0242384690438056	ACE2/ATP1A3/CACNA1H/CACNA1I/CACNB2/CACNG6/CASQ1/CNTNAP1/DMPK/FLNA/FXYD3/GJA1/ITPR3/KCND1/KCNIP2/KCNIP3/KCNK1/KCNMB2/KCNQ1/MAG/NOS1/PLN/PRKACA/RNF207/SCN2B/SCN3B/TNR/TYMP	28
GO:0043270	BP	GO:0043270	positive regulation of ion transport	34/1114	284/18866	7.08138486957232e-05	0.0474895372815694	0.0462153538856299	ABCA7/ACE2/ACTN2/AKAP6/AKT1/ARF1/ARRB2/BDKRB1/CACNB2/CASQ1/CFTR/CYP4A11/FLNA/GDNF/GRIN1/GRM6/HAP1/IL13/KCNIP2/KCNMB1/KCNQ1/LRRC52/MLLT6/NOS1/P2RY12/PIRT/RNF207/S100A1/SCN3B/SLC38A3/SSTR4/SYT1/UCN/WNK4	34
GO:0006814	BP	GO:0006814	sodium ion transport	30/1114	241/18866	9.13381330280367e-05	0.0528522214004211	0.051434152773059	AKT1/ARF1/ATP1A3/CACNA1H/CACNA1I/DMPK/FXYD3/KCNK1/MFSD4B/MLLT6/NOS1/SCN2B/SCN3B/SLC13A5/SLC17A1/SLC17A3/SLC17A4/SLC23A2/SLC34A3/SLC38A3/SLC4A8/SLC6A12/SLC6A13/SLC6A16/SLC6A18/SLC6A19/SLC9A5/SLC9A8/TPCN1/WNK4	30
GO:0006813	BP	GO:0006813	potassium ion transport	30/1114	242/18866	9.85129942225929e-05	0.0528522214004211	0.051434152773059	ACTN2/ADCYAP1/AKAP6/ATP1A3/DPP6/FLNA/FXYD3/KCNA3/KCNAB3/KCNB2/KCND1/KCNF1/KCNIP2/KCNIP3/KCNK1/KCNK16/KCNMB1/KCNMB2/KCNN4/KCNQ1/KCNS1/LRRC52/NOS1/P2RY12/PTK2B/RNF207/SLC9A5/SLC9A8/VAMP2/WNK4	30
GO:0008016	BP	GO:0008016	regulation of heart contraction	31/1114	256/18866	0.000117619291918574	0.0573458923006878	0.0558072547822458	ACE2/APLN/ATP1A3/CACNA1H/CACNB2/CACNG6/CASQ1/DMPK/FLNA/FXYD3/GJA1/GRK2/GSK3A/ITPR3/KCND1/KCNIP2/KCNIP3/KCNK1/KCNQ1/MYH7/NMU/NOS1/NPFF/PLN/PRKACA/RNF207/S100A1/SCN2B/SCN3B/TNNI3/UCN	31
GO:0033630	BP	GO:0033630	positive regulation of cell adhesion mediated by integrin	7/1114	21/18866	0.00013722838526665	0.0573458923006878	0.0558072547822458	CD3E/IFT74/NCKAP1L/P2RY12/PIEZO1/RET/SFRP2	7
GO:0007218	BP	GO:0007218	neuropeptide signaling pathway	17/1114	106/18866	0.000152069953402757	0.0573458923006878	0.0558072547822458	ADCYAP1/GALR3/LTB4R/NMU/NMUR2/NPBWR1/NPFF/NPY1R/NPY6R/NXPH2/NXPH3/OPRL1/OPRM1/PROK2/SSTR4/TAC3/UCN	17
GO:0061337	BP	GO:0061337	cardiac conduction	21/1114	148/18866	0.000164977670804048	0.0573458923006878	0.0558072547822458	ACE2/ATP1A3/CACNB2/CACNG6/CASQ1/DMPK/FLNA/FXYD3/GJA1/ITPR3/KCND1/KCNIP2/KCNIP3/KCNK1/KCNQ1/NOS1/PLN/PRKACA/RNF207/SCN2B/SCN3B	21
GO:0003015	BP	GO:0003015	heart process	34/1114	297/18866	0.000170051514052809	0.0573458923006878	0.0558072547822458	ACE2/APLN/ATP1A3/CACNA1H/CACNB2/CACNG6/CASQ1/DMPK/FLNA/FXYD3/GJA1/GRK2/GSK3A/ITPR3/KCND1/KCNIP2/KCNIP3/KCNK1/KCNQ1/MYH7/NMU/NOS1/NPFF/PLN/PRKACA/RNF207/S100A1/SCN2B/SCN3B/SRC/TCAP/TNNI3/UCN/WWTR1	34
GO:0043266	BP	GO:0043266	regulation of potassium ion transport	17/1114	107/18866	0.000171022232397205	0.0573458923006878	0.0558072547822458	ACTN2/ADCYAP1/AKAP6/DPP6/FLNA/KCNAB3/KCNIP2/KCNIP3/KCNMB1/KCNQ1/KCNS1/LRRC52/NOS1/PTK2B/RNF207/VAMP2/WNK4	17
GO:0022898	BP	GO:0022898	regulation of transmembrane transporter activity	32/1114	276/18866	0.000207002971782945	0.0653277025656175	0.0635749065042356	ACE2/ACTN2/AKAP6/ANO9/CACNB2/CASQ1/CFTR/FXYD3/GJA1/GRIA4/GRIN1/HAP1/KCNIP2/KCNS1/LRRC52/NOS1/OPRL1/OPRM1/PIM1/PIRT/PLN/PM20D1/PRKACA/PTK2B/RASGRF1/RNF207/S100A1/SCN2B/SCN3B/SLN/VAMP2/WNK4	32
GO:0035725	BP	GO:0035725	sodium ion transmembrane transport	23/1114	174/18866	0.000241896314574787	0.0720985404274297	0.0701640772099968	ARF1/ATP1A3/CACNA1H/CACNA1I/FXYD3/KCNK1/NOS1/SCN2B/SCN3B/SLC17A1/SLC17A3/SLC17A4/SLC34A3/SLC4A8/SLC6A12/SLC6A13/SLC6A16/SLC6A18/SLC6A19/SLC9A5/SLC9A8/TPCN1/WNK4	23
GO:0038003	BP	GO:0038003	opioid receptor signaling pathway	5/1114	12/18866	0.000397217536894452	0.101838539669554	0.0991061277796608	NPBWR1/OPRL1/OPRM1/PPP1R9B/SYP	5
GO:0060047	BP	GO:0060047	heart contraction	32/1114	287/18866	0.000417323641535784	0.101838539669554	0.0991061277796608	ACE2/APLN/ATP1A3/CACNA1H/CACNB2/CACNG6/CASQ1/DMPK/FLNA/FXYD3/GJA1/GRK2/GSK3A/ITPR3/KCND1/KCNIP2/KCNIP3/KCNK1/KCNQ1/MYH7/NMU/NOS1/NPFF/PLN/PRKACA/RNF207/S100A1/SCN2B/SCN3B/TCAP/TNNI3/UCN	32
GO:1901381	BP	GO:1901381	positive regulation of potassium ion transmembrane transport	9/1114	40/18866	0.000437885969907322	0.101838539669554	0.0991061277796608	ACTN2/AKAP6/FLNA/KCNIP2/KCNMB1/KCNQ1/LRRC52/RNF207/WNK4	9
GO:1903524	BP	GO:1903524	positive regulation of blood circulation	13/1114	76/18866	0.000467279822994218	0.101838539669554	0.0991061277796608	ACE2/AKT1/APLN/EGFR/FGA/GJA1/GSK3A/HRH2/KCNQ1/NMU/RNF207/SCN3B/UCN	13
GO:0019233	BP	GO:0019233	sensory perception of pain	16/1114	106/18866	0.000475881204710433	0.101838539669554	0.0991061277796608	ADCYAP1/ALOXE3/ARRB2/BDKRB1/EDNRB/GRIN1/LXN/NMU/NMUR2/NPFF/NPY1R/OPRL1/OPRM1/PRDM12/PROK2/SCN3B	16
GO:0006836	BP	GO:0006836	neurotransmitter transport	27/1114	229/18866	0.000482010596781481	0.101838539669554	0.0991061277796608	APBA1/BRSK1/CACNB2/CPLX1/GDNF/GPM6B/GRM4/NOS1/P2RY4/PIP5K1C/PPFIA3/SLC29A1/SLC29A2/SLC30A1/SLC4A8/SLC6A12/SLC6A13/SLC6A16/SLC6A18/STX1A/STXBP2/STXBP5L/SYN1/SYN2/SYP/SYT1/VAMP2	27
GO:0071805	BP	GO:0071805	potassium ion transmembrane transport	26/1114	218/18866	0.000509996569586892	0.101838539669554	0.0991061277796608	ACTN2/AKAP6/ATP1A3/DPP6/FLNA/KCNA3/KCNAB3/KCNB2/KCND1/KCNF1/KCNIP2/KCNIP3/KCNK1/KCNK16/KCNMB1/KCNMB2/KCNN4/KCNQ1/KCNS1/LRRC52/P2RY12/RNF207/SLC9A5/SLC9A8/VAMP2/WNK4	26
GO:0015698	BP	GO:0015698	inorganic anion transport	22/1114	172/18866	0.000518474089630568	0.101838539669554	0.0991061277796608	ANO9/APOL1/BEST1/CA2/CA7/CFTR/CLCN6/FXYD3/GABRA4/NMUR2/P2RY4/SLC17A1/SLC17A3/SLC22A8/SLC26A10/SLC26A6/SLC34A3/SLC4A2/SLC4A8/TG/TTYH3/WNK4	22
GO:0050806	BP	GO:0050806	positive regulation of synaptic transmission	22/1114	172/18866	0.000518474089630568	0.101838539669554	0.0991061277796608	ADCYAP1/AGER/ARRB2/CA2/CA7/CACNB2/CRHR2/EGFR/GRIN1/HAP1/ITPR3/KCTD13/MPP2/NFATC4/NMU/PTK2B/S100B/SLC4A8/STX1A/SYT1/TNR/VAMP2	22
GO:0032409	BP	GO:0032409	regulation of transporter activity	32/1114	291/18866	0.000531496572366729	0.101838539669554	0.0991061277796608	ACE2/ACTN2/AKAP6/ANO9/CACNB2/CASQ1/CFTR/FXYD3/GJA1/GRIA4/GRIN1/HAP1/KCNIP2/KCNS1/LRRC52/NOS1/OPRL1/OPRM1/PIM1/PIRT/PLN/PM20D1/PRKACA/PTK2B/RASGRF1/RNF207/S100A1/SCN2B/SCN3B/SLN/VAMP2/WNK4	32
GO:0001696	BP	GO:0001696	gastric acid secretion	6/1114	19/18866	0.000582730860325512	0.10780520916022	0.104912706613958	CCKBR/HRH2/KCNQ1/NMU/OPRL1/UCN	6
GO:0034764	BP	GO:0034764	positive regulation of transmembrane transport	25/1114	210/18866	0.000665168505848519	0.118191710045365	0.115020529126406	ACE2/ACTN2/AKAP6/AKT1/ARF1/BDKRB1/CA2/CACNB2/CAPN10/CASQ1/CFTR/FLNA/HAP1/IL13/KCNIP2/KCNMB1/KCNQ1/LRRC52/NOS1/PIRT/PRKCI/RNF207/S100A1/SLC26A6/WNK4	25
GO:0008217	BP	GO:0008217	regulation of blood pressure	23/1114	187/18866	0.000682934391688034	0.118191710045365	0.115020529126406	ACE2/APLN/BDKRB1/CD34/CTSZ/CYP4A11/ECE1/EDNRB/GJA1/GSK3A/GUCY1A1/KLK3/NMU/NOS1/NOX1/NPFF/NPY1R/OPRL1/PCSK5/POSTN/TAC3/TNNI3/UCN	23
GO:0086014	BP	GO:0086014	atrial cardiac muscle cell action potential	6/1114	20/18866	0.000791166825758706	0.122438757360625	0.119153624664482	CACNB2/FLNA/GJA1/KCNQ1/RNF207/SCN3B	6
GO:0086026	BP	GO:0086026	atrial cardiac muscle cell to AV node cell signaling	6/1114	20/18866	0.000791166825758706	0.122438757360625	0.119153624664482	CACNB2/FLNA/GJA1/KCNQ1/RNF207/SCN3B	6
GO:0086066	BP	GO:0086066	atrial cardiac muscle cell to AV node cell communication	6/1114	20/18866	0.000791166825758706	0.122438757360625	0.119153624664482	CACNB2/FLNA/GJA1/KCNQ1/RNF207/SCN3B	6
GO:0006821	BP	GO:0006821	chloride transport	16/1114	111/18866	0.000798761697599605	0.122438757360625	0.119153624664482	ANO9/APOL1/BEST1/CA2/CA7/CFTR/CLCN6/FXYD3/GABRA4/NMUR2/P2RY4/SLC26A10/SLC26A6/SLC4A8/TTYH3/WNK4	16
GO:1901379	BP	GO:1901379	regulation of potassium ion transmembrane transport	14/1114	91/18866	0.000867314287946339	0.129253920967558	0.125785931819118	ACTN2/AKAP6/DPP6/FLNA/KCNAB3/KCNIP2/KCNIP3/KCNMB1/KCNQ1/KCNS1/LRRC52/RNF207/VAMP2/WNK4	14
GO:0106070	BP	GO:0106070	regulation of adenylate cyclase-activating G protein-coupled receptor signaling pathway	5/1114	14/18866	0.000909128608174736	0.131823648185337	0.128286711139308	GSK3A/NOS1/OPRL1/OPRM1/SSTR4	5
GO:0043949	BP	GO:0043949	regulation of cAMP-mediated signaling	10/1114	53/18866	0.00094318603392767	0.133083354102789	0.129512618109547	ADCYAP1/CDC34/GIPR/GSK3A/NOS1/OPRL1/OPRM1/SSTR4/TCP11/UCN	10
GO:0051047	BP	GO:0051047	positive regulation of secretion	35/1114	340/18866	0.000997279888219075	0.133083354102789	0.129512618109547	ACHE/ADCYAP1/APLN/ARF1/ATP13A2/C2CD2L/CACNA1H/CACNA1I/CACNB2/CAPN10/CD34/CFTR/CYP4A11/EDNRB/EGFR/FGA/GDNF/GIPR/GJA1/GRK2/HGS/HTR2B/IL13/IL1A/IRF3/KCNN4/NMU/OPRL1/PRL/SLC4A8/SRC/SSTR4/STX1A/SYT1/UCN	35
GO:0098656	BP	GO:0098656	anion transmembrane transport	33/1114	315/18866	0.00102036919563668	0.133083354102789	0.129512618109547	ABCD1/ACE2/AKT1/ANO9/APOL1/BEST1/CFTR/CLCN6/FOLR1/FXYD3/GABRA4/GJA1/NMUR2/SLC13A5/SLC17A1/SLC23A2/SLC26A10/SLC26A6/SLC38A3/SLC38A5/SLC4A2/SLC4A8/SLC6A12/SLC6A13/SLC6A18/SLC6A19/SLC7A4/SLC7A9/SLC9A5/SLC9A8/THBS1/THRSP/TTYH3	33
GO:0002029	BP	GO:0002029	desensitization of G protein-coupled receptor signaling pathway	6/1114	21/18866	0.00105274220195553	0.133083354102789	0.129512618109547	APLN/ARR3/ARRB2/GIPR/GRK2/HTR2B	6
GO:0022401	BP	GO:0022401	negative adaptation of signaling pathway	6/1114	21/18866	0.00105274220195553	0.133083354102789	0.129512618109547	APLN/ARR3/ARRB2/GIPR/GRK2/HTR2B	6
GO:1904064	BP	GO:1904064	positive regulation of cation transmembrane transport	19/1114	147/18866	0.00106665130035786	0.133083354102789	0.129512618109547	ACE2/ACTN2/AKAP6/ARF1/BDKRB1/CACNB2/CASQ1/FLNA/HAP1/IL13/KCNIP2/KCNMB1/KCNQ1/LRRC52/NOS1/PIRT/RNF207/S100A1/WNK4	19
GO:0034767	BP	GO:0034767	positive regulation of ion transmembrane transport	20/1114	161/18866	0.00131233833507756	0.160015799265706	0.15572244358815	ACE2/ACTN2/AKAP6/ARF1/BDKRB1/CACNB2/CASQ1/CFTR/FLNA/HAP1/IL13/KCNIP2/KCNMB1/KCNQ1/LRRC52/NOS1/PIRT/RNF207/S100A1/WNK4	20
GO:0023058	BP	GO:0023058	adaptation of signaling pathway	6/1114	22/18866	0.00137587437030145	0.16403479992594	0.159633611150765	APLN/ARR3/ARRB2/GIPR/GRK2/HTR2B	6
GO:0043268	BP	GO:0043268	positive regulation of potassium ion transport	9/1114	47/18866	0.00150533718941368	0.175336475535446	0.170632053496014	ACTN2/AKAP6/FLNA/KCNIP2/KCNMB1/KCNQ1/LRRC52/RNF207/WNK4	9
GO:0001505	BP	GO:0001505	regulation of neurotransmitter levels	26/1114	235/18866	0.00155164266654551	0.175336475535446	0.170632053496014	ACHE/APBA1/BRSK1/CACNB2/COLQ/CPLX1/GDNF/GPM6B/GRM4/HNMT/NOS1/P2RY4/PIP5K1C/PPFIA3/SLC29A1/SLC29A2/SLC30A1/SLC4A8/STX1A/STXBP2/STXBP5L/SYN1/SYN2/SYP/SYT1/VAMP2	26
GO:0006936	BP	GO:0006936	muscle contraction	36/1114	362/18866	0.00156871404020529	0.175336475535446	0.170632053496014	ACE2/ACTN2/ARHGEF11/CACNA1H/CACNB2/CASQ1/CCDC78/DMPK/EDNRB/FLNA/GDNF/GJA1/GRK2/GUCY1A1/HSPB6/HTR2B/ITGA1/KCNB2/KCNIP2/KCNQ1/LTB4R/MYH7/NMU/NMUR2/NOS1/PABPN1/PLN/PRKACA/PROK2/RNF207/SCN2B/SCN3B/TCAP/TLN1/TNNI3/UCN	36
GO:0042391	BP	GO:0042391	regulation of membrane potential	42/1114	443/18866	0.0017017907243631	0.183601702095022	0.178675517220054	ABCD1/ACTN2/ADCYAP1/AKAP6/AKT1/ARRB2/ATP1A3/CACNA1H/CACNA1I/CACNB2/CFTR/CNTNAP1/DMPK/FLNA/GABBR1/GABRA4/GJA1/GRIN1/GSK3A/INSYN1/KCNIP2/KCNK1/KCNK16/KCNMB2/KCNN4/KCNQ1/MPP2/MYOC/NPFF/OPRM1/PIEZO1/PLN/PMAIP1/PTK2B/RNF207/SCN2B/SCN3B/SEZ6/SLC29A1/SLC4A8/SRC/STX1A	42
GO:0033628	BP	GO:0033628	regulation of cell adhesion mediated by integrin	9/1114	48/18866	0.00175728907172597	0.183601702095022	0.178675517220054	CD3E/EFNA1/HRG/IFT74/NCKAP1L/P2RY12/PIEZO1/RET/SFRP2	9
GO:0034380	BP	GO:0034380	high-density lipoprotein particle assembly	5/1114	16/18866	0.00179655627094353	0.183601702095022	0.178675517220054	ABCA7/APOA5/LCAT/PRKACA/ZDHHC8	5
GO:1904262	BP	GO:1904262	negative regulation of TORC1 signaling	5/1114	16/18866	0.00179655627094353	0.183601702095022	0.178675517220054	CASTOR3/DEPDC5/SPAAR/STK11/SZT2	5
GO:0014072	BP	GO:0014072	response to isoquinoline alkaloid	7/1114	31/18866	0.00184799476479612	0.183601702095022	0.178675517220054	AIF1/GRIN1/NPFF/OPRM1/PPP1R1B/PPP1R9B/PPP5C	7
GO:0043278	BP	GO:0043278	response to morphine	7/1114	31/18866	0.00184799476479612	0.183601702095022	0.178675517220054	AIF1/GRIN1/NPFF/OPRM1/PPP1R1B/PPP1R9B/PPP5C	7
GO:2001225	BP	GO:2001225	regulation of chloride transport	4/1114	10/18866	0.00190474595190955	0.185799309672631	0.180814161176485	ANO9/CA2/CA7/CFTR	4
GO:0032412	BP	GO:0032412	regulation of ion transmembrane transporter activity	28/1114	265/18866	0.00208672062513788	0.19991528846187	0.194551396629396	ACTN2/AKAP6/ANO9/CACNB2/CASQ1/CFTR/FXYD3/GRIA4/GRIN1/HAP1/KCNIP2/KCNS1/LRRC52/NOS1/OPRL1/OPRM1/PIRT/PLN/PRKACA/PTK2B/RASGRF1/RNF207/S100A1/SCN2B/SCN3B/SLN/VAMP2/WNK4	28
GO:0097755	BP	GO:0097755	positive regulation of blood vessel diameter	10/1114	60/18866	0.00251020027012421	0.236267095600288	0.229927854844249	ADCYAP1/APLN/EDNRB/EGFR/GJA1/GUCY1A1/ITGA1/KCNMB1/NOS1/UCN	10
GO:0006885	BP	GO:0006885	regulation of pH	14/1114	103/18866	0.00290157683829136	0.267438615861597	0.260263017545204	ATP6V0A1/ATP6V0D2/ATP6V1G2/CA2/CA7/CCKBR/CFTR/EDNRB/NOX1/SLC26A6/SLC4A2/SLC4A8/SLC9A5/SLC9A8	14
GO:0018105	BP	GO:0018105	peptidyl-serine phosphorylation	31/1114	310/18866	0.00294107704302595	0.267438615861597	0.260263017545204	AKT1/ARRB2/BRSK1/DCLK2/DMPK/EGFR/EIF4G1/GRK2/GSK3A/HDAC6/IFNA14/IFNA17/MAP4K1/MAPK12/MST1/NOS1/NSD1/PKN1/PKN3/PRKACA/PRKCI/PRKY/PWP1/RAPGEF3/RET/SFRP2/SRC/TSSK4/TTBK1/UCN/ULK1	31
GO:0046942	BP	GO:0046942	carboxylic acid transport	34/1114	350/18866	0.00304553566223603	0.269793326642262	0.262554549496369	ABCD1/ACE2/AKT1/APBA1/ATP8B1/CPLX1/CYP4A11/FABP4/FOLR1/GJA1/NMUR2/PPFIA3/SLC13A5/SLC17A1/SLC17A3/SLC17A4/SLC23A2/SLC25A45/SLC26A10/SLC26A6/SLC38A3/SLC38A5/SLC6A12/SLC6A13/SLC6A18/SLC6A19/SLC7A4/SLC7A9/SSTR4/STX1A/SYT1/THBS1/THRSP/VAMP2	34
GO:2001257	BP	GO:2001257	regulation of cation channel activity	21/1114	185/18866	0.00308972840333082	0.269793326642262	0.262554549496369	ACTN2/AKAP6/CACNB2/CASQ1/GRIA4/GRIN1/HAP1/KCNIP2/KCNS1/LRRC52/NOS1/OPRL1/OPRM1/PIRT/PLN/PRKACA/PTK2B/RASGRF1/RNF207/S100A1/VAMP2	21
GO:0017157	BP	GO:0017157	regulation of exocytosis	24/1114	222/18866	0.00311783527526938	0.269793326642262	0.262554549496369	APBA1/ARF1/ATP13A2/CACNA1H/CACNA1I/CACNB2/CFTR/CPLX1/FGA/HAP1/HGS/IL13/LGALS9/P2RY4/SLC4A8/STX1A/STXBP2/STXBP5L/STXBP6/SYN1/SYP/SYT1/SYT15/VAMP2	24
GO:0015701	BP	GO:0015701	bicarbonate transport	8/1114	43/18866	0.00328883653362221	0.271455507736664	0.264172132903095	CA2/CA4/CA7/CFTR/SLC26A10/SLC26A6/SLC4A2/SLC4A8	8
GO:0045823	BP	GO:0045823	positive regulation of heart contraction	8/1114	43/18866	0.00328883653362221	0.271455507736664	0.264172132903095	ACE2/APLN/GSK3A/KCNQ1/NMU/RNF207/SCN3B/UCN	8
GO:0046717	BP	GO:0046717	acid secretion	8/1114	43/18866	0.00328883653362221	0.271455507736664	0.264172132903095	APBA1/CCKBR/HRH2/KCNQ1/NMU/OPRL1/SLC26A6/UCN	8
GO:0060074	BP	GO:0060074	synapse maturation	6/1114	26/18866	0.00346760264680883	0.273368120871845	0.266033429052701	ANAPC2/BCAN/DISC1/NFATC4/SEZ6/SEZ6L	6
GO:0070633	BP	GO:0070633	transepithelial transport	6/1114	26/18866	0.00346760264680883	0.273368120871845	0.266033429052701	BEST1/CFTR/EDNRB/P2RY4/SLC23A2/SLC26A6	6
GO:0015849	BP	GO:0015849	organic acid transport	34/1114	353/18866	0.00348638020633564	0.273368120871845	0.266033429052701	ABCD1/ACE2/AKT1/APBA1/ATP8B1/CPLX1/CYP4A11/FABP4/FOLR1/GJA1/NMUR2/PPFIA3/SLC13A5/SLC17A1/SLC17A3/SLC17A4/SLC23A2/SLC25A45/SLC26A10/SLC26A6/SLC38A3/SLC38A5/SLC6A12/SLC6A13/SLC6A18/SLC6A19/SLC7A4/SLC7A9/SSTR4/STX1A/SYT1/THBS1/THRSP/VAMP2	34
GO:0051966	BP	GO:0051966	regulation of synaptic transmission, glutamatergic	11/1114	73/18866	0.00354491441947283	0.273368120871845	0.266033429052701	ADCYAP1/DGKZ/DISC1/EGFR/GRM4/GRM6/MIR142/PTK2B/SYT1/TNR/UCN	11
GO:0045744	BP	GO:0045744	negative regulation of G protein-coupled receptor signaling pathway	9/1114	53/18866	0.0035667788370977	0.273368120871845	0.266033429052701	APLN/ARR3/ARRB2/GIPR/GRK2/HTR2B/OPRL1/OPRM1/SSTR4	9
GO:0043666	BP	GO:0043666	regulation of phosphoprotein phosphatase activity	15/1114	117/18866	0.00370973828791932	0.278883669142848	0.271400990621185	B3GAT3/DMPK/HSP90B1/ITGA1/NCKAP1L/PPP1R10/PPP1R14A/PPP1R15A/PPP1R1B/PPP1R37/PPP1R9B/PPP2R1A/PPP2R5E/PPP6R2/TIPRL	15
GO:0032091	BP	GO:0032091	negative regulation of protein binding	14/1114	106/18866	0.00378604682195517	0.278883669142848	0.271400990621185	AKT1/ARRB2/CRMP1/CTSZ/DDX11/DISC1/DNAJB2/GOLGA2/NFATC4/PIM2/SYMPK/TLE5/TTBK1/WFIKKN2	14
GO:0016486	BP	GO:0016486	peptide hormone processing	7/1114	35/18866	0.00384667129852204	0.278883669142848	0.271400990621185	ACE2/CTSZ/ECE1/FURIN/PCSK1/PCSK5/TSHB	7
GO:0140448	BP	GO:0140448	signaling receptor ligand precursor processing	7/1114	35/18866	0.00384667129852204	0.278883669142848	0.271400990621185	ACE2/CTSZ/ECE1/FURIN/PCSK1/PCSK5/TSHB	7
GO:0060453	BP	GO:0060453	regulation of gastric acid secretion	4/1114	12/18866	0.00408240237056848	0.291193463150638	0.283380502717843	KCNQ1/NMU/OPRL1/UCN	4
GO:0045956	BP	GO:0045956	positive regulation of calcium ion-dependent exocytosis	5/1114	19/18866	0.00412501457585247	0.291193463150638	0.283380502717843	ARF1/CACNA1H/CACNA1I/STX1A/SYT1	5
GO:0030308	BP	GO:0030308	negative regulation of cell growth	21/1114	190/18866	0.00423173651874459	0.291771279396888	0.283942815678337	ARHGAP4/BDKRB1/CCAR2/DNAJB2/FRZB/GJA1/GSK3A/HNF4A/HRG/MAG/MT3/PLXNA3/PPP1R9B/PPP2R1A/RERG/SERTAD3/SFRP2/STK11/TNR/TRIM46/TSPYL2	21
GO:0046425	BP	GO:0046425	regulation of receptor signaling pathway via JAK-STAT	17/1114	142/18866	0.0042860997228415	0.291771279396888	0.283942815678337	DOT1L/HGS/HPX/IFNA14/IFNA17/IFNL1/IL13/IL18/IL20/PARP14/PPP2R1A/PRL/PTK2B/PWP1/RET/TNFSF18/VHL	17
GO:0006941	BP	GO:0006941	striated muscle contraction	20/1114	178/18866	0.00429635248319741	0.291771279396888	0.283942815678337	ACE2/ARHGEF11/CACNB2/CASQ1/CCDC78/DMPK/FLNA/GJA1/GRK2/KCNQ1/MYH7/NOS1/PLN/PRKACA/RNF207/SCN2B/SCN3B/TCAP/TNNI3/UCN	20
GO:0003012	BP	GO:0003012	muscle system process	42/1114	467/18866	0.00443693260721343	0.294074914175409	0.28618464203856	ACE2/ACTN2/AIF1/AKAP6/ARHGEF11/CACNA1H/CACNB2/CASQ1/CCDC78/DMPK/EDNRB/FLNA/GDNF/GJA1/GRK2/GSK3A/GUCY1A1/HSPB6/HTR2B/ITGA1/KCNB2/KCNIP2/KCNQ1/LTB4R/MYH7/MYOC/NMU/NMUR2/NOS1/PABPN1/PLN/PRKACA/PRKAG3/PROK2/RNF207/SCN2B/SCN3B/SLN/TCAP/TLN1/TNNI3/UCN	42
GO:0071634	BP	GO:0071634	regulation of transforming growth factor beta production	7/1114	36/18866	0.00453631706891651	0.294074914175409	0.28618464203856	CD34/FURIN/IL13/ITGAV/LGALS9/LUM/THBS1	7
GO:0120162	BP	GO:0120162	positive regulation of cold-induced thermogenesis	13/1114	97/18866	0.00455469992405724	0.294074914175409	0.28618464203856	ACHE/ADCYAP1/CNOT3/ELOVL3/FABP4/GJA1/IL13/IL18/IRF4/LEPR/PDGFC/SIRT6/SLN	13
GO:0035296	BP	GO:0035296	regulation of tube diameter	17/1114	143/18866	0.00460434161989457	0.294074914175409	0.28618464203856	ACE2/ADCYAP1/AKT1/APLN/ECE1/EDNRB/EGFR/FGA/GJA1/GUCY1A1/HRH2/HTR2B/ITGA1/KCNMB1/KCNMB2/NOS1/UCN	17
GO:0097746	BP	GO:0097746	regulation of blood vessel diameter	17/1114	143/18866	0.00460434161989457	0.294074914175409	0.28618464203856	ACE2/ADCYAP1/AKT1/APLN/ECE1/EDNRB/EGFR/FGA/GJA1/GUCY1A1/HRH2/HTR2B/ITGA1/KCNMB1/KCNMB2/NOS1/UCN	17
GO:0018209	BP	GO:0018209	peptidyl-serine modification	32/1114	333/18866	0.00466035499663067	0.29415064184616	0.286258337873537	AKT1/ARRB2/BRSK1/DCLK2/DMPK/EGFR/EIF4G1/GALNT2/GRK2/GSK3A/HDAC6/IFNA14/IFNA17/MAP4K1/MAPK12/MST1/NOS1/NSD1/PKN1/PKN3/PRKACA/PRKCI/PRKY/PWP1/RAPGEF3/RET/SFRP2/SRC/TSSK4/TTBK1/UCN/ULK1	32
GO:0035150	BP	GO:0035150	regulation of tube size	17/1114	144/18866	0.0049416817434263	0.3035158876886	0.295372306457145	ACE2/ADCYAP1/AKT1/APLN/ECE1/EDNRB/EGFR/FGA/GJA1/GUCY1A1/HRH2/HTR2B/ITGA1/KCNMB1/KCNMB2/NOS1/UCN	17
GO:0006942	BP	GO:0006942	regulation of striated muscle contraction	13/1114	98/18866	0.0049749511233598	0.3035158876886	0.295372306457145	ACE2/CASQ1/DMPK/FLNA/GRK2/KCNQ1/MYH7/NOS1/PLN/PRKACA/RNF207/TNNI3/UCN	13
GO:0051453	BP	GO:0051453	regulation of intracellular pH	12/1114	87/18866	0.00498043089700008	0.3035158876886	0.295372306457145	ATP6V0A1/ATP6V0D2/ATP6V1G2/CA2/CA7/CFTR/NOX1/SLC26A6/SLC4A2/SLC4A8/SLC9A5/SLC9A8	12
GO:0002793	BP	GO:0002793	positive regulation of peptide secretion	21/1114	193/18866	0.00507154566137501	0.3035158876886	0.295372306457145	ACHE/ADCYAP1/APLN/ARF1/ATP13A2/C2CD2L/CAPN10/CD34/CFTR/EGFR/FGA/GIPR/GJA1/HTR2B/IL13/IL1A/IRF3/KCNN4/NMU/SRC/UCN	21
GO:0120254	BP	GO:0120254	olefinic compound metabolic process	15/1114	121/18866	0.00510011799712003	0.3035158876886	0.295372306457145	ABCD1/AKR1C3/ALOXE3/CACNA1H/CYP17A1/CYP2C9/CYP2D6/CYP2S1/CYP4A11/ELOVL3/FAAH/GRIN1/PTGES2/PTGIS/STAR	15
GO:0043950	BP	GO:0043950	positive regulation of cAMP-mediated signaling	5/1114	20/18866	0.00523629715921704	0.3035158876886	0.295372306457145	ADCYAP1/GIPR/GSK3A/NOS1/UCN	5
GO:0071636	BP	GO:0071636	positive regulation of transforming growth factor beta production	5/1114	20/18866	0.00523629715921704	0.3035158876886	0.295372306457145	CD34/FURIN/LGALS9/LUM/THBS1	5
GO:0016125	BP	GO:0016125	sterol metabolic process	19/1114	169/18866	0.0052613192087679	0.3035158876886	0.295372306457145	ACADVL/APOA5/APOL1/CFTR/CYP2C9/CYP2D6/CYP8B1/DISP3/FASN/FAXDC2/GBA2/LCAT/LEPR/LMF1/MT3/MVD/SERPINA12/SREBF2/STAR	19
GO:0010951	BP	GO:0010951	negative regulation of endopeptidase activity	26/1114	258/18866	0.00553057486217611	0.311050301566062	0.302704565805203	AKT1/AMBP/ARRB2/CST11/CST5/CST8/FETUB/FURIN/HRG/ITIH2/LTF/LXN/MT3/PZP/SERPINA12/SERPINA4/SERPINB10/SFRP2/SPINK13/SPINK2/SRC/TFPI/THBS1/WFDC8/WFDC9/WFIKKN2	26
GO:0051346	BP	GO:0051346	negative regulation of hydrolase activity	42/1114	473/18866	0.00553158508423699	0.311050301566062	0.302704565805203	ADCYAP1/AKT1/AMBP/ARRB2/CST11/CST5/CST8/FETUB/FURIN/HRG/ITIH2/LEPR/LTF/LXN/MT3/NCKAP1L/NOS1/PLIN5/PLN/PPP1R10/PPP1R14A/PPP1R15A/PPP1R1B/PPP1R37/PPP1R9B/PZP/SERPINA12/SERPINA4/SERPINB10/SFRP2/SPINK13/SPINK2/SRC/TFPI/THBS1/TIPRL/TNK2/TNNI3/TSKS/WFDC8/WFDC9/WFIKKN2	42
GO:0005513	BP	GO:0005513	detection of calcium ion	4/1114	13/18866	0.00562383583446561	0.311050301566062	0.302704565805203	KCNIP2/KCNMB1/KCNMB2/SYT1	4
GO:0033605	BP	GO:0033605	positive regulation of catecholamine secretion	4/1114	13/18866	0.00562383583446561	0.311050301566062	0.302704565805203	GDNF/GRK2/STX1A/SYT1	4
GO:0042310	BP	GO:0042310	vasoconstriction	11/1114	78/18866	0.00593203827771564	0.324748830203514	0.316035551637697	ACE2/AKT1/APLN/ECE1/EDNRB/EGFR/FGA/GJA1/HRH2/HTR2B/KCNMB2	11
GO:0007565	BP	GO:0007565	female pregnancy	21/1114	196/18866	0.00604453609109847	0.327565011401447	0.318776172374784	ADCYAP1/AKT1/AMBP/ARID1A/DAZAP1/EPN1/EPOR/GJA1/LGALS9/NPFF/PCSK5/PRL/PSG2/PSG4/PSG6/PSG9/PTGIS/PZP/SLC38A3/TAC3/UCN	21
GO:0043032	BP	GO:0043032	positive regulation of macrophage activation	6/1114	29/18866	0.00615128865313957	0.327964115015794	0.31916456771047	IL13/IL1RL1/LBP/MIR142/THBS1/TTBK1	6
GO:0071604	BP	GO:0071604	transforming growth factor beta production	7/1114	38/18866	0.00619026311559336	0.327964115015794	0.31916456771047	CD34/FURIN/IL13/ITGAV/LGALS9/LUM/THBS1	7
GO:1903532	BP	GO:1903532	positive regulation of secretion by cell	30/1114	313/18866	0.00623529165547268	0.327964115015794	0.31916456771047	ACHE/ADCYAP1/APLN/ARF1/ATP13A2/C2CD2L/CACNA1H/CACNA1I/CACNB2/CAPN10/CD34/CFTR/EGFR/FGA/GDNF/GIPR/GJA1/GRK2/HGS/HTR2B/IL13/IL1A/IRF3/KCNN4/NMU/SLC4A8/SRC/STX1A/SYT1/UCN	30
GO:0008277	BP	GO:0008277	regulation of G protein-coupled receptor signaling pathway	17/1114	148/18866	0.00649893858163368	0.338512674664706	0.329430100816587	ADCYAP1/APLN/ARR3/ARRB2/GIPR/GRK2/GSK3A/HTR2B/KLK6/NOS1/OPRL1/OPRM1/PPP1R9B/RGS18/RGS5/SSTR4/SYP	17
GO:0019369	BP	GO:0019369	arachidonic acid metabolic process	9/1114	58/18866	0.00659039433604404	0.339975630893041	0.330853804724478	AKR1C3/ALOXE3/CYP2C9/CYP2D6/CYP2S1/CYP4A11/FAAH/PTGES2/PTGIS	9
GO:0006937	BP	GO:0006937	regulation of muscle contraction	19/1114	173/18866	0.00674915230792833	0.344849544114624	0.335596946840346	ACE2/CASQ1/DMPK/FLNA/GRK2/GUCY1A1/HSPB6/KCNB2/KCNQ1/MYH7/NMU/NMUR2/NOS1/PLN/PRKACA/PROK2/RNF207/TNNI3/UCN	19
GO:0045921	BP	GO:0045921	positive regulation of exocytosis	12/1114	91/18866	0.00714706635354137	0.359512698028344	0.349866676258515	ARF1/ATP13A2/CACNA1H/CACNA1I/CACNB2/CFTR/FGA/HGS/IL13/SLC4A8/STX1A/SYT1	12
GO:0001659	BP	GO:0001659	temperature homeostasis	19/1114	174/18866	0.00717015073420928	0.359512698028344	0.349866676258515	ACADVL/ACHE/ADCYAP1/APLN/CNOT3/EDNRB/ELOVL3/FABP4/GJA1/IL13/IL18/IL1A/IRF4/LEPR/NMU/PDGFC/SIRT6/SLN/STK11	19
GO:0048265	BP	GO:0048265	response to pain	6/1114	30/18866	0.00731249494047035	0.362969738374127	0.353230961364727	EDNRB/NMUR2/PIRT/RET/THBS1/UCN	6
GO:0032802	BP	GO:0032802	low-density lipoprotein particle receptor catabolic process	4/1114	14/18866	0.00750971872498194	0.362969738374127	0.353230961364727	ABCA2/AP2A1/AP2M1/FURIN	4
GO:0060452	BP	GO:0060452	positive regulation of cardiac muscle contraction	4/1114	14/18866	0.00750971872498194	0.362969738374127	0.353230961364727	ACE2/KCNQ1/RNF207/UCN	4
GO:1901678	BP	GO:1901678	iron coordination entity transport	4/1114	14/18866	0.00750971872498194	0.362969738374127	0.353230961364727	ABCB6/HPX/HRG/LTF	4
GO:1904892	BP	GO:1904892	regulation of receptor signaling pathway via STAT	17/1114	151/18866	0.00790993051061322	0.376184211557951	0.366090879350064	DOT1L/HGS/HPX/IFNA14/IFNA17/IFNL1/IL13/IL18/IL20/PARP14/PPP2R1A/PRL/PTK2B/PWP1/RET/TNFSF18/VHL	17
GO:0035304	BP	GO:0035304	regulation of protein dephosphorylation	16/1114	139/18866	0.00797050853078421	0.376184211557951	0.366090879350064	B3GAT3/DMPK/HSP90B1/ITGA1/NCKAP1L/PPP1R10/PPP1R14A/PPP1R15A/PPP1R1B/PPP1R37/PPP1R9B/PPP2R1A/PPP2R5E/PPP6R2/SYMPK/TIPRL	16
GO:0051291	BP	GO:0051291	protein heterooligomerization	5/1114	22/18866	0.00806359446955534	0.376184211557951	0.366090879350064	CPSF7/GRIN1/KRT1/SYT1/TMEM120B	5
GO:0061339	BP	GO:0061339	establishment or maintenance of monopolar cell polarity	5/1114	22/18866	0.00806359446955534	0.376184211557951	0.366090879350064	CARMIL2/GBF1/PRKCI/SH3BP1/SYNE4	5
GO:0051924	BP	GO:0051924	regulation of calcium ion transport	25/1114	253/18866	0.00819030799288667	0.376365978537118	0.366267769371483	AKAP6/ARRB2/BDKRB1/BEST1/CACNB2/CACNG6/CASQ1/GJA1/GRIN1/GRM6/HAP1/IL13/NOS1/OPRL1/P2RY12/PLN/PLPP4/PRKACA/PTK2B/S100A1/SLC30A1/SLN/TMC2/TSPAN13/UCN	25
GO:0019229	BP	GO:0019229	regulation of vasoconstriction	9/1114	60/18866	0.00823883674485943	0.376365978537118	0.366267769371483	ACE2/AKT1/APLN/ECE1/EGFR/FGA/GJA1/HRH2/KCNMB2	9
GO:0007259	BP	GO:0007259	receptor signaling pathway via JAK-STAT	18/1114	164/18866	0.00827794696502888	0.376365978537118	0.366267769371483	DOT1L/HGS/HPX/IFNA14/IFNA17/IFNL1/IFNL2/IL13/IL18/IL20/PARP14/PPP2R1A/PRL/PTK2B/PWP1/RET/TNFSF18/VHL	18
GO:0060048	BP	GO:0060048	cardiac muscle contraction	16/1114	140/18866	0.00852106781939134	0.382377072577038	0.372117580807791	ACE2/CACNB2/FLNA/GJA1/GRK2/KCNQ1/MYH7/NOS1/PLN/PRKACA/RNF207/SCN2B/SCN3B/TCAP/TNNI3/UCN	16
GO:0033627	BP	GO:0033627	cell adhesion mediated by integrin	10/1114	71/18866	0.00857935002911455	0.382377072577038	0.372117580807791	CD3E/EFNA1/HRG/IFT74/ITGAV/NCKAP1L/P2RY12/PIEZO1/RET/SFRP2	10
GO:0034377	BP	GO:0034377	plasma lipoprotein particle assembly	6/1114	31/18866	0.00862397498263218	0.382377072577038	0.372117580807791	ABCA7/APOA5/ARF1/LCAT/PRKACA/ZDHHC8	6
GO:0008203	BP	GO:0008203	cholesterol metabolic process	17/1114	153/18866	0.00898018295244324	0.394907225736541	0.384311539638641	ACADVL/APOA5/APOL1/CFTR/CYP2C9/CYP2D6/DISP3/FASN/GBA2/LCAT/LEPR/LMF1/MT3/MVD/SERPINA12/SREBF2/STAR	17
GO:0030641	BP	GO:0030641	regulation of cellular pH	12/1114	94/18866	0.00921151177065316	0.401786671947595	0.391006404642188	ATP6V0A1/ATP6V0D2/ATP6V1G2/CA2/CA7/CFTR/NOX1/SLC26A6/SLC4A2/SLC4A8/SLC9A5/SLC9A8	12
GO:0045912	BP	GO:0045912	negative regulation of carbohydrate metabolic process	8/1114	51/18866	0.00953392606277194	0.412496075215899	0.401428465800924	AP2A1/COX11/GSK3A/LEPR/MST1/SERPINA12/SIRT6/SOGA1	8
GO:0032799	BP	GO:0032799	low-density lipoprotein receptor particle metabolic process	5/1114	23/18866	0.00981196583386033	0.421129573589285	0.409830320302714	ABCA2/AP2A1/AP2M1/FURIN/ITGAV	5
GO:0003073	BP	GO:0003073	regulation of systemic arterial blood pressure	12/1114	95/18866	0.0099939205365201	0.425534791098653	0.414117342198326	ACE2/CTSZ/CYP4A11/ECE1/GJA1/GSK3A/KLK3/NMU/NOX1/PCSK5/POSTN/TNNI3	12
GO:0086019	BP	GO:0086019	cell-cell signaling involved in cardiac conduction	6/1114	32/18866	0.0100956762097451	0.425976282798199	0.414546988311977	CACNB2/FLNA/GJA1/KCNQ1/RNF207/SCN3B	6
GO:1990845	BP	GO:1990845	adaptive thermogenesis	17/1114	155/18866	0.0101630874553904	0.425976282798199	0.414546988311977	ACHE/ADCYAP1/BMP8A/CNOT3/ELOVL3/FABP4/GJA1/IL13/IL18/IRF4/LEPR/PDGFC/PM20D1/SIRT6/SLN/STK11/UCP3	17
GO:1903779	BP	GO:1903779	regulation of cardiac conduction	10/1114	73/18866	0.0103882461439563	0.432038298932754	0.420446355561183	ACE2/ATP1A3/CASQ1/DMPK/FLNA/FXYD3/ITPR3/NOS1/PRKACA/RNF207	10
GO:0010466	BP	GO:0010466	negative regulation of peptidase activity	26/1114	272/18866	0.0107158648725428	0.436736783822629	0.42501877623196	AKT1/AMBP/ARRB2/CST11/CST5/CST8/FETUB/FURIN/HRG/ITIH2/LTF/LXN/MT3/PZP/SERPINA12/SERPINA4/SERPINB10/SFRP2/SPINK13/SPINK2/SRC/TFPI/THBS1/WFDC8/WFDC9/WFIKKN2	26
GO:0044058	BP	GO:0044058	regulation of digestive system process	7/1114	42/18866	0.0107887791096371	0.436736783822629	0.42501877623196	APOA5/KCNQ1/NMU/OPRL1/TYMP/UCN/WNK4	7
GO:0006865	BP	GO:0006865	amino acid transport	17/1114	156/18866	0.010799249521337	0.436736783822629	0.42501877623196	ACE2/APBA1/CPLX1/GJA1/PPFIA3/SLC25A45/SLC38A3/SLC38A5/SLC6A12/SLC6A13/SLC6A18/SLC6A19/SLC7A4/SLC7A9/STX1A/SYT1/VAMP2	17
GO:0035249	BP	GO:0035249	synaptic transmission, glutamatergic	12/1114	96/18866	0.0108268391888928	0.436736783822629	0.42501877623196	ADCYAP1/DGKZ/DISC1/EGFR/GRIN1/GRM4/GRM6/MIR142/PTK2B/SYT1/TNR/UCN	12
GO:0060078	BP	GO:0060078	regulation of postsynaptic membrane potential	16/1114	144/18866	0.0110335051832285	0.441751905283738	0.429899337853994	ADCYAP1/AKT1/ARRB2/DMPK/GABBR1/GABRA4/GRIN1/GSK3A/INSYN1/MPP2/NPFF/OPRM1/PTK2B/SEZ6/SLC29A1/STX1A	16
GO:0051100	BP	GO:0051100	negative regulation of binding	18/1114	169/18866	0.0111289637962745	0.442273264940836	0.430406709002118	AKT1/ARRB2/CRMP1/CTSZ/CYP2D6/DDX11/DISC1/DNAJB2/GOLGA2/HAND1/NFATC4/PIM2/PLN/SLN/SYMPK/TLE5/TTBK1/WFIKKN2	18
GO:0051588	BP	GO:0051588	regulation of neurotransmitter transport	14/1114	120/18866	0.0112254867903189	0.442828945809271	0.430947480495214	APBA1/CACNB2/CPLX1/GDNF/GPM6B/NOS1/P2RY4/SLC30A1/SLC4A8/STX1A/STXBP5L/SYN1/SYP/SYT1	14
GO:2001259	BP	GO:2001259	positive regulation of cation channel activity	10/1114	74/18866	0.0113947021288508	0.446223189206455	0.434250653546675	ACTN2/AKAP6/CACNB2/CASQ1/HAP1/KCNIP2/LRRC52/PIRT/RNF207/S100A1	10
GO:0021700	BP	GO:0021700	developmental maturation	27/1114	287/18866	0.0115087821904688	0.447424756897573	0.435419982187073	AGRN/ANAPC2/BCAN/C1QA/CFTR/DISC1/EDNRB/GPAT4/GRIN1/KCNIP2/LTF/MYOC/NFATC4/NTN4/PABPC1L/POU2F2/PPP2R1A/PRKACA/PTK2B/PTPRN/RERE/RET/SEZ6/SEZ6L/SLC26A6/SYP/TCP11	27
GO:0042445	BP	GO:0042445	hormone metabolic process	22/1114	221/18866	0.0115960094205802	0.447572593823112	0.435563852526146	ACE2/ADH1A/AKR1C3/CACNA1H/CTSZ/CYP17A1/CYP2C9/CYP2D6/CYP2S1/DHRS2/ECE1/FURIN/KLK6/PCSK1/PCSK5/PNPLA2/PNPLA4/RDH12/SAFB/STAR/TG/TSHB	22
GO:1902476	BP	GO:1902476	chloride transmembrane transport	12/1114	97/18866	0.0117123176733401	0.448832745124783	0.436790192930578	ANO9/APOL1/BEST1/CFTR/CLCN6/FXYD3/GABRA4/NMUR2/SLC26A10/SLC26A6/SLC4A8/TTYH3	12
GO:0042738	BP	GO:0042738	exogenous drug catabolic process	5/1114	24/18866	0.0118038522772847	0.449132393387462	0.43708180138359	CYP2C9/CYP2D6/CYP2S1/CYP4B1/NOS1	5
GO:0033138	BP	GO:0033138	positive regulation of peptidyl-serine phosphorylation	13/1114	109/18866	0.0119659276041728	0.452092968988642	0.439962942303167	AKT1/ARRB2/EGFR/EIF4G1/GSK3A/HDAC6/IFNA14/IFNA17/NOS1/RAPGEF3/RET/SFRP2/UCN	13
GO:0097756	BP	GO:0097756	negative regulation of blood vessel diameter	11/1114	86/18866	0.0121887970068645	0.457292978614181	0.445023431387911	ACE2/AKT1/APLN/ECE1/EDNRB/EGFR/FGA/GJA1/HRH2/HTR2B/KCNMB2	11
GO:0045989	BP	GO:0045989	positive regulation of striated muscle contraction	4/1114	16/18866	0.0124259604581268	0.462953318457294	0.450531899651381	ACE2/KCNQ1/RNF207/UCN	4
GO:0055067	BP	GO:0055067	monovalent inorganic cation homeostasis	17/1114	159/18866	0.0128986486017092	0.477249998263242	0.464444987763904	ATP1A3/ATP6V0A1/ATP6V0D2/ATP6V1G2/CA2/CA7/CCKBR/CFTR/CYP4A11/EDNRB/MLLT6/NOX1/SLC26A6/SLC4A2/SLC4A8/SLC9A5/SLC9A8	17
GO:0006022	BP	GO:0006022	aminoglycan metabolic process	18/1114	172/18866	0.0131824629028548	0.481115057645008	0.468206344419334	AGRN/AKT1/AP2A1/B3GALT5/B3GAT3/B3GNT6/BCAN/CHST5/CTBS/GPC6/ITIH2/LUM/LYG1/PGLYRP4/PIM1/ST3GAL1/ST3GAL3/STAB2	18
GO:0050714	BP	GO:0050714	positive regulation of protein secretion	18/1114	172/18866	0.0131824629028548	0.481115057645008	0.468206344419334	ACHE/ARF1/ATP13A2/C2CD2L/CAPN10/CD34/CFTR/EGFR/FGA/GIPR/GJA1/HTR2B/IL13/IL1A/IRF3/KCNN4/NMU/SRC	18
GO:0010765	BP	GO:0010765	positive regulation of sodium ion transport	6/1114	34/18866	0.0135582459650164	0.487383774015746	0.474306865967155	AKT1/ARF1/MLLT6/NOS1/SCN3B/WNK4	6
GO:0018149	BP	GO:0018149	peptide cross-linking	6/1114	34/18866	0.0135582459650164	0.487383774015746	0.474306865967155	ABCA7/COL3A1/KRT1/KRT2/TGM4/THBS1	6
GO:0033555	BP	GO:0033555	multicellular organismal response to stress	10/1114	76/18866	0.013626759758129	0.487383774015746	0.474306865967155	ADCYAP1/EDNRB/EIF4G1/GJA1/NMUR2/NOS1/PIRT/RET/THBS1/UCN	10
GO:0006633	BP	GO:0006633	fatty acid biosynthetic process	18/1114	173/18866	0.0139295570364592	0.490630719732041	0.477466693455814	ABCD1/ABHD1/ACADVL/ACSBG2/AKR1C3/ALOXE3/APOA5/CYP2C9/CYP2D6/CYP4A11/ELOVL3/FASN/LTC4S/PRKAG3/PTGES2/PTGIS/TECRL/THNSL2	18
GO:0031644	BP	GO:0031644	regulation of nervous system process	16/1114	148/18866	0.0140964126585207	0.490630719732041	0.477466693455814	DLGAP4/DMPK/EDNRB/GRIN1/MAG/NMU/NMUR2/NPFF/OPRL1/OPRM1/PTK2B/S100B/SRC/STX1A/TNR/TYMP	16
GO:0010506	BP	GO:0010506	regulation of autophagy	31/1114	347/18866	0.0143639970803402	0.490630719732041	0.477466693455814	AKT1/ATP13A2/ATP6V0A1/ATP6V0D2/ATP6V1G2/DEPDC5/EIF4G1/GOLGA2/GPR137/GSK3A/HDAC6/HTR2B/KAT5/LEPR/MAPK15/MT3/MTDH/PIM2/PRKACA/PRKAG3/RAB3GAP2/RNF5/SNRNP70/SOGA1/SREBF2/STK11/TBC1D25/TPCN1/TRIM21/ULK1/WDR24	31
GO:0097696	BP	GO:0097696	receptor signaling pathway via STAT	18/1114	174/18866	0.0147094885328727	0.490630719732041	0.477466693455814	DOT1L/HGS/HPX/IFNA14/IFNA17/IFNL1/IFNL2/IL13/IL18/IL20/PARP14/PPP2R1A/PRL/PTK2B/PWP1/RET/TNFSF18/VHL	18
GO:0044706	BP	GO:0044706	multi-multicellular organism process	22/1114	226/18866	0.0147476282590376	0.490630719732041	0.477466693455814	ADCYAP1/AKT1/AMBP/ARID1A/DAZAP1/EDDM3A/EPN1/EPOR/GJA1/LGALS9/NPFF/PCSK5/PRL/PSG2/PSG4/PSG6/PSG9/PTGIS/PZP/SLC38A3/TAC3/UCN	22
GO:0099565	BP	GO:0099565	chemical synaptic transmission, postsynaptic	13/1114	112/18866	0.014801750768195	0.490630719732041	0.477466693455814	AKT1/ARRB2/DMPK/GRIN1/GSK3A/INSYN1/MPP2/NPFF/OPRM1/PTK2B/SEZ6/SLC29A1/STX1A	13
GO:1902652	BP	GO:1902652	secondary alcohol metabolic process	17/1114	162/18866	0.0153059141104417	0.490630719732041	0.477466693455814	ACADVL/APOA5/APOL1/CFTR/CYP2C9/CYP2D6/DISP3/FASN/GBA2/LCAT/LEPR/LMF1/MT3/MVD/SERPINA12/SREBF2/STAR	17
GO:1903305	BP	GO:1903305	regulation of regulated secretory pathway	17/1114	162/18866	0.0153059141104417	0.490630719732041	0.477466693455814	APBA1/ARF1/CACNA1H/CACNA1I/CACNB2/CPLX1/IL13/LGALS9/P2RY4/SLC4A8/STX1A/STXBP2/STXBP5L/SYN1/SYP/SYT1/SYT15	17
GO:0002031	BP	GO:0002031	G protein-coupled receptor internalization	4/1114	17/18866	0.0155039548312039	0.490630719732041	0.477466693455814	APLN/ARR3/ARRB2/HTR2B	4
GO:0006895	BP	GO:0006895	Golgi to endosome transport	4/1114	17/18866	0.0155039548312039	0.490630719732041	0.477466693455814	AP2A1/CORO7/GBF1/VPS13A	4
GO:0031649	BP	GO:0031649	heat generation	4/1114	17/18866	0.0155039548312039	0.490630719732041	0.477466693455814	APLN/EDNRB/IL1A/NMU	4
GO:1903818	BP	GO:1903818	positive regulation of voltage-gated potassium channel activity	4/1114	17/18866	0.0155039548312039	0.490630719732041	0.477466693455814	AKAP6/KCNIP2/LRRC52/RNF207	4
GO:0007269	BP	GO:0007269	neurotransmitter secretion	18/1114	175/18866	0.0155231883827676	0.490630719732041	0.477466693455814	APBA1/BRSK1/CACNB2/CPLX1/GRM4/P2RY4/PIP5K1C/PPFIA3/SLC30A1/SLC4A8/STX1A/STXBP2/STXBP5L/SYN1/SYN2/SYP/SYT1/VAMP2	18
GO:0099643	BP	GO:0099643	signal release from synapse	18/1114	175/18866	0.0155231883827676	0.490630719732041	0.477466693455814	APBA1/BRSK1/CACNB2/CPLX1/GRM4/P2RY4/PIP5K1C/PPFIA3/SLC30A1/SLC4A8/STX1A/STXBP2/STXBP5L/SYN1/SYN2/SYP/SYT1/VAMP2	18
GO:0043687	BP	GO:0043687	post-translational protein modification	32/1114	363/18866	0.0155485725014836	0.490630719732041	0.477466693455814	ABCA2/APOA5/APOL1/ASB14/ASB16/ATG12/COPS7B/CUL7/DCAF17/ESCO2/FBXL19/FBXL22/FBXL4/FBXL8/FBXO27/FBXO44/FGA/HIF3A/HSP90B1/IGFBP4/ITIH2/KCTD6/LMO7/MATN3/NUCB1/PNPLA2/PSMC6/PSMD3/PSME3/SPARCL1/VGF/VHL	32
GO:0065005	BP	GO:0065005	protein-lipid complex assembly	6/1114	35/18866	0.0155675372753255	0.490630719732041	0.477466693455814	ABCA7/APOA5/ARF1/LCAT/PRKACA/ZDHHC8	6
GO:0010677	BP	GO:0010677	negative regulation of cellular carbohydrate metabolic process	7/1114	45/18866	0.0155806019331484	0.490630719732041	0.477466693455814	COX11/GSK3A/LEPR/MST1/SERPINA12/SIRT6/SOGA1	7
GO:0014047	BP	GO:0014047	glutamate secretion	7/1114	45/18866	0.0155806019331484	0.490630719732041	0.477466693455814	APBA1/CPLX1/GJA1/PPFIA3/STX1A/SYT1/VAMP2	7
GO:0032722	BP	GO:0032722	positive regulation of chemokine production	7/1114	45/18866	0.0155806019331484	0.490630719732041	0.477466693455814	ADCYAP1/AGER/IL7/LBP/LGALS9/MAVS/SELENOK	7
GO:0016049	BP	GO:0016049	cell growth	41/1114	490/18866	0.0156191618053088	0.490630719732041	0.477466693455814	AKAP6/AKT1/ANAPC2/ARHGAP4/ARHGEF11/BDKRB1/BRAT1/CCAR2/DISC1/DNAJB2/EGFR/EIF4G1/FLRT1/FRZB/GDI1/GJA1/GSK3A/H1-5/HDAC6/HNF4A/HRG/IGFBP4/MAG/MT3/PLXNA3/POSTN/PPP1R9B/PPP2R1A/PTK2B/RERG/SERTAD3/SFRP2/SIRT6/STK11/SYT1/TAOK2/TNR/TRIM46/TSPYL2/UCN/ULK1	41
GO:0001676	BP	GO:0001676	long-chain fatty acid metabolic process	13/1114	113/18866	0.0158528535397225	0.490630719732041	0.477466693455814	ABCD1/ACSBG2/AKR1C3/ALOXE3/CYP2C9/CYP2D6/CYP2S1/CYP4A11/ELOVL3/FAAH/LTC4S/PTGES2/PTGIS	13
GO:1905039	BP	GO:1905039	carboxylic acid transmembrane transport	16/1114	150/18866	0.0158573357903236	0.490630719732041	0.477466693455814	ABCD1/ACE2/AKT1/FOLR1/SLC13A5/SLC23A2/SLC38A3/SLC38A5/SLC6A12/SLC6A13/SLC6A18/SLC6A19/SLC7A4/SLC7A9/THBS1/THRSP	16
GO:0052548	BP	GO:0052548	regulation of endopeptidase activity	37/1114	434/18866	0.0160392904907305	0.490630719732041	0.477466693455814	ABCA2/AGER/AKT1/AMBP/ARRB2/ATP13A2/CST11/CST5/CST8/EFNA1/FETUB/FURIN/GRIN1/HRG/ITIH2/LGALS9/LTF/LXN/MT3/PMAIP1/PSENEN/PSME3/PZP/SERPINA12/SERPINA4/SERPINB10/SFRP2/SOX2/SPINK13/SPINK2/SRC/TFPI/THBS1/TTBK1/WFDC8/WFDC9/WFIKKN2	37
GO:0001558	BP	GO:0001558	regulation of cell growth	36/1114	420/18866	0.0161016578511515	0.490630719732041	0.477466693455814	AKAP6/AKT1/ANAPC2/ARHGAP4/ARHGEF11/BDKRB1/BRAT1/CCAR2/DISC1/DNAJB2/EGFR/EIF4G1/FRZB/GDI1/GJA1/GSK3A/H1-5/HNF4A/HRG/IGFBP4/MAG/MT3/PLXNA3/PPP1R9B/PPP2R1A/PTK2B/RERG/SERTAD3/SFRP2/STK11/SYT1/TAOK2/TNR/TRIM46/TSPYL2/UCN	36
GO:0061045	BP	GO:0061045	negative regulation of wound healing	10/1114	78/18866	0.0161710945493583	0.490630719732041	0.477466693455814	AGER/CD34/EPPK1/F12/FGA/GJA1/HRG/KRT1/TFPI/THBS1	10
GO:0086065	BP	GO:0086065	cell communication involved in cardiac conduction	8/1114	56/18866	0.0164340412798988	0.490630719732041	0.477466693455814	ATP1A3/CACNB2/FLNA/GJA1/KCNQ1/PRKACA/RNF207/SCN3B	8
GO:1903307	BP	GO:1903307	positive regulation of regulated secretory pathway	8/1114	56/18866	0.0164340412798988	0.490630719732041	0.477466693455814	ARF1/CACNA1H/CACNA1I/CACNB2/IL13/SLC4A8/STX1A/SYT1	8
GO:0042730	BP	GO:0042730	fibrinolysis	5/1114	26/18866	0.0165738653015969	0.490630719732041	0.477466693455814	F12/FGA/HRG/KRT1/THBS1	5
GO:0042737	BP	GO:0042737	drug catabolic process	5/1114	26/18866	0.0165738653015969	0.490630719732041	0.477466693455814	CYP2C9/CYP2D6/CYP2S1/CYP4B1/NOS1	5
GO:1901018	BP	GO:1901018	positive regulation of potassium ion transmembrane transporter activity	5/1114	26/18866	0.0165738653015969	0.490630719732041	0.477466693455814	ACTN2/AKAP6/KCNIP2/LRRC52/RNF207	5
GO:0035567	BP	GO:0035567	non-canonical Wnt signaling pathway	16/1114	151/18866	0.0167992504901411	0.490630719732041	0.477466693455814	AP2A1/AP2M1/ARRB2/CCDC88C/CELSR3/DVL3/FRZB/GPC6/MYOC/PLCB2/PSMC6/PSMD3/PSME3/RNF213/SFRP2/TNRC6C	16
GO:1903825	BP	GO:1903825	organic acid transmembrane transport	16/1114	151/18866	0.0167992504901411	0.490630719732041	0.477466693455814	ABCD1/ACE2/AKT1/FOLR1/SLC13A5/SLC23A2/SLC38A3/SLC38A5/SLC6A12/SLC6A13/SLC6A18/SLC6A19/SLC7A4/SLC7A9/THBS1/THRSP	16
GO:0030004	BP	GO:0030004	cellular monovalent inorganic cation homeostasis	13/1114	114/18866	0.0169597969419923	0.490630719732041	0.477466693455814	ATP1A3/ATP6V0A1/ATP6V0D2/ATP6V1G2/CA2/CA7/CFTR/NOX1/SLC26A6/SLC4A2/SLC4A8/SLC9A5/SLC9A8	13
GO:0022600	BP	GO:0022600	digestive system process	12/1114	102/18866	0.0170002906152921	0.490630719732041	0.477466693455814	APOA5/CCKBR/HRH2/KCNN4/KCNQ1/NMU/OPRL1/SLC26A6/TFF1/TYMP/UCN/WNK4	12
GO:0090257	BP	GO:0090257	regulation of muscle system process	24/1114	256/18866	0.0171417558240927	0.490630719732041	0.477466693455814	ACE2/AIF1/AKAP6/CASQ1/DMPK/FLNA/GRK2/GSK3A/GUCY1A1/HSPB6/KCNB2/KCNQ1/MYH7/NMU/NMUR2/NOS1/PLN/PRKACA/PRKAG3/PROK2/RNF207/SLN/TNNI3/UCN	24
GO:0032007	BP	GO:0032007	negative regulation of TOR signaling	7/1114	46/18866	0.0174684339973879	0.490630719732041	0.477466693455814	AKT1S1/CASTOR3/DEPDC5/GSK3A/SPAAR/STK11/SZT2	7
GO:0034405	BP	GO:0034405	response to fluid shear stress	6/1114	36/18866	0.0177737813166073	0.490630719732041	0.477466693455814	AKT1/CA2/GJA1/PTK2B/SRC/SREBF2	6
GO:2000310	BP	GO:2000310	regulation of NMDA receptor activity	6/1114	36/18866	0.0177737813166073	0.490630719732041	0.477466693455814	ACTN2/GRIA4/GRIN1/OPRM1/PTK2B/RASGRF1	6
GO:1903169	BP	GO:1903169	regulation of calcium ion transmembrane transport	16/1114	152/18866	0.017783696122486	0.490630719732041	0.477466693455814	AKAP6/BDKRB1/CACNB2/CACNG6/CASQ1/HAP1/IL13/NOS1/OPRL1/PLN/PRKACA/PTK2B/S100A1/SLN/TMC2/TSPAN13	16
GO:0006547	BP	GO:0006547	histidine metabolic process	3/1114	10/18866	0.0180157039677935	0.490630719732041	0.477466693455814	CARNS1/HDC/HNMT	3
GO:0010749	BP	GO:0010749	regulation of nitric oxide mediated signal transduction	3/1114	10/18866	0.0180157039677935	0.490630719732041	0.477466693455814	EGFR/GUCY1A1/THBS1	3
GO:0015851	BP	GO:0015851	nucleobase transport	3/1114	10/18866	0.0180157039677935	0.490630719732041	0.477466693455814	SLC23A2/SLC28A1/SLC29A2	3
GO:0015886	BP	GO:0015886	heme transport	3/1114	10/18866	0.0180157039677935	0.490630719732041	0.477466693455814	ABCB6/HPX/HRG	3
GO:0021859	BP	GO:0021859	pyramidal neuron differentiation	3/1114	10/18866	0.0180157039677935	0.490630719732041	0.477466693455814	DCLK2/DISC1/PLXNA3	3
GO:0042756	BP	GO:0042756	drinking behavior	3/1114	10/18866	0.0180157039677935	0.490630719732041	0.477466693455814	ACE2/APLN/UCN	3
GO:0045792	BP	GO:0045792	negative regulation of cell size	3/1114	10/18866	0.0180157039677935	0.490630719732041	0.477466693455814	AKT1/AKT1S1/UCN	3
GO:0072530	BP	GO:0072530	purine-containing compound transmembrane transport	3/1114	10/18866	0.0180157039677935	0.490630719732041	0.477466693455814	SLC28A1/SLC29A1/SLC29A2	3
GO:0048167	BP	GO:0048167	regulation of synaptic plasticity	19/1114	191/18866	0.0181891959164596	0.491865982890206	0.478668813486128	AGER/ANAPC2/ARF1/BRSK1/CRHR2/GRIN1/HRH2/ITPR3/MPP2/NFATC4/PPFIA3/PTK2B/RASGRF1/S100B/STAR/SYP/TNR/VAMP2/VGF	19
GO:0060079	BP	GO:0060079	excitatory postsynaptic potential	12/1114	103/18866	0.0182444232237001	0.491865982890206	0.478668813486128	AKT1/ARRB2/DMPK/GRIN1/GSK3A/MPP2/NPFF/OPRM1/PTK2B/SEZ6/SLC29A1/STX1A	12
GO:0045721	BP	GO:0045721	negative regulation of gluconeogenesis	4/1114	18/18866	0.0190214177399153	0.506837067687098	0.493238211748272	LEPR/MST1/SERPINA12/SOGA1	4
GO:2000300	BP	GO:2000300	regulation of synaptic vesicle exocytosis	10/1114	80/18866	0.0190514927437929	0.506837067687098	0.493238211748272	APBA1/CACNB2/CPLX1/P2RY4/SLC4A8/STX1A/STXBP5L/SYN1/SYP/SYT1	10
GO:0034968	BP	GO:0034968	histone lysine methylation	13/1114	116/18866	0.0193481927111271	0.506837067687098	0.493238211748272	DOT1L/EHMT2/H1-3/H1-4/H1-5/MLLT6/NSD1/NSD3/PRDM12/PWP1/PYGO2/SUPT6H/ZNF335	13
GO:0002026	BP	GO:0002026	regulation of the force of heart contraction	5/1114	27/18866	0.0193772230405958	0.506837067687098	0.493238211748272	APLN/GRK2/MYH7/NOS1/PLN	5
GO:0048143	BP	GO:0048143	astrocyte activation	5/1114	27/18866	0.0193772230405958	0.506837067687098	0.493238211748272	AGER/C1QA/EGFR/MIR142/TTBK1	5
GO:0042551	BP	GO:0042551	neuron maturation	7/1114	47/18866	0.0195117413702336	0.506837067687098	0.493238211748272	AGRN/C1QA/EDNRB/KCNIP2/MYOC/NTN4/RET	7
GO:0007200	BP	GO:0007200	phospholipase C-activating G protein-coupled receptor signaling pathway	12/1114	104/18866	0.0195555028911891	0.506837067687098	0.493238211748272	ACTN2/CCKBR/EDNRB/F2RL2/GPR20/HTR2B/LTB4R/NMUR2/OPRL1/OPRM1/P2RY12/P2RY4	12
GO:1901606	BP	GO:1901606	alpha-amino acid catabolic process	12/1114	104/18866	0.0195555028911891	0.506837067687098	0.493238211748272	AGXT2/AMT/CARNS1/HDC/HMGCLL1/HNMT/NOS1/OAT/OGDH/PRODH2/TDO2/THNSL2	12
GO:0072330	BP	GO:0072330	monocarboxylic acid biosynthetic process	23/1114	246/18866	0.0198766771933855	0.512684486262082	0.498928739267166	ABCD1/ABHD1/ACADVL/ACSBG2/AKR1C3/ALOXE3/APOA5/BCAN/CYP2C9/CYP2D6/CYP4A11/CYP8B1/ELOVL3/FASN/LDHC/LTC4S/PKM/PRKAG3/PTGES2/PTGIS/STAR/TECRL/THNSL2	23
GO:0071692	BP	GO:0071692	protein localization to extracellular region	39/1114	470/18866	0.0203112431301832	0.521386695662359	0.507397461222406	ACHE/ADCYAP1/ARF1/ATP13A2/BMP8A/C2CD2L/CAPN10/CAVIN1/CD34/CDK16/CER1/CFTR/CPLX1/EGFR/FGA/GIPR/GJA1/HNF4A/HTR2B/IL13/IL1A/IRF3/ITPR3/KCNN4/LMF1/LRP5L/NMU/NPFF/OPRM1/PCSK5/POU2F2/PTPRN/RAPGEF3/SRC/STX1A/STXBP5L/TNFSF13B/TVP23C/VGF	39
GO:0031146	BP	GO:0031146	SCF-dependent proteasomal ubiquitin-dependent protein catabolic process	11/1114	93/18866	0.0209691198442519	0.533172170447447	0.518866722012917	FBXL17/FBXL22/FBXL4/FBXL6/FBXL8/FBXO27/FBXO44/PSMC6/PSMD3/PSME3/WWTR1	11
GO:1903035	BP	GO:1903035	negative regulation of response to wounding	11/1114	93/18866	0.0209691198442519	0.533172170447447	0.518866722012917	AGER/CD34/EPPK1/F12/FGA/GJA1/HRG/KRT1/TFPI/THBS1/TNR	11
GO:0046461	BP	GO:0046461	neutral lipid catabolic process	7/1114	48/18866	0.0217162853363454	0.545741158872153	0.531098474126822	APOA5/FAAH/FABP4/LYPLA2/PLIN5/PNPLA2/PNPLA4	7
GO:0046464	BP	GO:0046464	acylglycerol catabolic process	7/1114	48/18866	0.0217162853363454	0.545741158872153	0.531098474126822	APOA5/FAAH/FABP4/LYPLA2/PLIN5/PNPLA2/PNPLA4	7
GO:0016571	BP	GO:0016571	histone methylation	15/1114	143/18866	0.0218880493448981	0.545741158872153	0.531098474126822	DOT1L/EHMT2/FBLL1/H1-3/H1-4/H1-5/MLLT6/NSD1/NSD3/PRDM12/PRMT8/PWP1/PYGO2/SUPT6H/ZNF335	15
GO:0033559	BP	GO:0033559	unsaturated fatty acid metabolic process	13/1114	118/18866	0.0219808034146971	0.545741158872153	0.531098474126822	ABCD1/AKR1C3/ALOXE3/CYP2C9/CYP2D6/CYP2S1/CYP4A11/ELOVL3/FAAH/LTC4S/LYPLA2/PTGES2/PTGIS	13
GO:0045815	BP	GO:0045815	positive regulation of gene expression, epigenetic	8/1114	59/18866	0.0219914489834609	0.545741158872153	0.531098474126822	ARID1A/H1-3/H1-4/H1-5/PABPC1L/POLR2K/TAF1B/WBP2	8
GO:0032414	BP	GO:0032414	positive regulation of ion transmembrane transporter activity	12/1114	106/18866	0.0223865248295746	0.545741158872153	0.531098474126822	ACTN2/AKAP6/CACNB2/CASQ1/CFTR/HAP1/KCNIP2/LRRC52/PIRT/RNF207/S100A1/WNK4	12
GO:0032800	BP	GO:0032800	receptor biosynthetic process	5/1114	28/18866	0.0224743951494175	0.545741158872153	0.531098474126822	ACE2/ACHE/FURIN/HDAC6/ITGAV	5
GO:0051930	BP	GO:0051930	regulation of sensory perception of pain	6/1114	38/18866	0.0228091461425711	0.545741158872153	0.531098474126822	EDNRB/NMU/NMUR2/NPFF/OPRL1/OPRM1	6
GO:0051954	BP	GO:0051954	positive regulation of amine transport	6/1114	38/18866	0.0228091461425711	0.545741158872153	0.531098474126822	ACE2/GDNF/GRK2/SLC38A3/STX1A/SYT1	6
GO:0071276	BP	GO:0071276	cellular response to cadmium ion	6/1114	38/18866	0.0228091461425711	0.545741158872153	0.531098474126822	AKR1C3/AKT1/EGFR/MT3/PPP5C/STAR	6
GO:1903432	BP	GO:1903432	regulation of TORC1 signaling	6/1114	38/18866	0.0228091461425711	0.545741158872153	0.531098474126822	CASTOR3/DEPDC5/GPR137/SPAAR/STK11/SZT2	6
GO:0035303	BP	GO:0035303	regulation of dephosphorylation	20/1114	209/18866	0.0228750941843047	0.545741158872153	0.531098474126822	B3GAT3/CDK5RAP3/DMPK/HSP90B1/ITGA1/NCKAP1L/PPP1R10/PPP1R14A/PPP1R15A/PPP1R1B/PPP1R37/PPP1R9B/PPP2R1A/PPP2R5E/PPP6R2/SMG6/SRC/SYMPK/TIPRL/TSKS	20
GO:0007187	BP	GO:0007187	G protein-coupled receptor signaling pathway, coupled to cyclic nucleotide second messenger	24/1114	263/18866	0.022919070323309	0.545741158872153	0.531098474126822	ADCYAP1/ADGRD1/ADGRL4/CRHR2/FLNA/GABBR1/GALR3/GIPR/GPR26/GRM4/GRM6/GSK3A/HRH2/HTR2B/NOS1/NPY1R/OPRL1/OPRM1/OR10H3/OXER1/P2RY12/PLN/SSTR4/VIPR1	24
GO:0031935	BP	GO:0031935	regulation of chromatin silencing	4/1114	19/18866	0.0229937919169987	0.545741158872153	0.531098474126822	H1-3/H1-4/H1-5/SIRT6	4
GO:0032095	BP	GO:0032095	regulation of response to food	4/1114	19/18866	0.0229937919169987	0.545741158872153	0.531098474126822	MT3/NPFF/OPRM1/UCN	4
GO:0042982	BP	GO:0042982	amyloid precursor protein metabolic process	9/1114	71/18866	0.0234019445039196	0.545741158872153	0.531098474126822	ABCA2/ABCA7/ACHE/AGER/EFNA1/GSK3A/HAP1/KLK6/PSENEN	9
GO:0006857	BP	GO:0006857	oligopeptide transport	3/1114	11/18866	0.0237013401709621	0.545741158872153	0.531098474126822	CA2/GJA1/SLC26A6	3
GO:0019371	BP	GO:0019371	cyclooxygenase pathway	3/1114	11/18866	0.0237013401709621	0.545741158872153	0.531098474126822	AKR1C3/PTGES2/PTGIS	3
GO:0032908	BP	GO:0032908	regulation of transforming growth factor beta1 production	3/1114	11/18866	0.0237013401709621	0.545741158872153	0.531098474126822	FURIN/LUM/THBS1	3
GO:0042135	BP	GO:0042135	neurotransmitter catabolic process	3/1114	11/18866	0.0237013401709621	0.545741158872153	0.531098474126822	ACHE/COLQ/HNMT	3
GO:0106072	BP	GO:0106072	negative regulation of adenylate cyclase-activating G protein-coupled receptor signaling pathway	3/1114	11/18866	0.0237013401709621	0.545741158872153	0.531098474126822	OPRL1/OPRM1/SSTR4	3
GO:1902513	BP	GO:1902513	regulation of organelle transport along microtubule	3/1114	11/18866	0.0237013401709621	0.545741158872153	0.531098474126822	HAP1/STK11/TRIM46	3
GO:0032515	BP	GO:0032515	negative regulation of phosphoprotein phosphatase activity	8/1114	60/18866	0.0241072354817072	0.550731896599928	0.535955306251168	NCKAP1L/PPP1R10/PPP1R14A/PPP1R15A/PPP1R1B/PPP1R37/PPP1R9B/TIPRL	8
GO:0043491	BP	GO:0043491	protein kinase B signaling	25/1114	278/18866	0.0241233915565672	0.550731896599928	0.535955306251168	AKR1C3/AKT1/ARRB2/EGFR/FGF16/FGF22/FGF4/FGF7/IL18/LEMD2/LOX/MAZ/MST1R/MT3/MTDH/MYOC/OTUD3/P2RY12/PHLDA3/PIK3CD/RAPGEF1/RET/SRC/STK11/THBS1	25
GO:0033135	BP	GO:0033135	regulation of peptidyl-serine phosphorylation	15/1114	145/18866	0.0244662177317844	0.556053582165309	0.541134206610081	AKT1/ARRB2/EGFR/EIF4G1/GSK3A/HDAC6/IFNA14/IFNA17/NOS1/NSD1/PWP1/RAPGEF3/RET/SFRP2/UCN	15
GO:0009306	BP	GO:0009306	protein secretion	38/1114	462/18866	0.0245637835923911	0.556053582165309	0.541134206610081	ACHE/ADCYAP1/ARF1/ATP13A2/BMP8A/C2CD2L/CAPN10/CAVIN1/CD34/CDK16/CFTR/CPLX1/EGFR/FGA/GIPR/GJA1/HNF4A/HTR2B/IL13/IL1A/IRF3/ITPR3/KCNN4/LMF1/LRP5L/NMU/NPFF/OPRM1/PCSK5/POU2F2/PTPRN/RAPGEF3/SRC/STX1A/STXBP5L/TNFSF13B/TVP23C/VGF	38
GO:0060271	BP	GO:0060271	cilium assembly	32/1114	377/18866	0.0251489936657234	0.566909037884899	0.551698401512552	ABLIM3/ATAT1/CCDC13/CELSR3/CEP250/CEP89/CFAP410/CNTROB/DCX/DISC1/DNAH1/E2F4/FLNA/HAP1/HAUS5/HDAC6/HOATZ/IFT74/KIF3C/MAPK15/NME8/ODF2/ONECUT2/PPP2R1A/PRKACA/SPEF2/STK36/TMEM17/TPGS1/TUBA1A/TUBB4A/WWTR1	32
GO:0035592	BP	GO:0035592	establishment of protein localization to extracellular region	38/1114	463/18866	0.0252965226639959	0.567848720051624	0.552612871232856	ACHE/ADCYAP1/ARF1/ATP13A2/BMP8A/C2CD2L/CAPN10/CAVIN1/CD34/CDK16/CFTR/CPLX1/EGFR/FGA/GIPR/GJA1/HNF4A/HTR2B/IL13/IL1A/IRF3/ITPR3/KCNN4/LMF1/LRP5L/NMU/NPFF/OPRM1/PCSK5/POU2F2/PTPRN/RAPGEF3/SRC/STX1A/STXBP5L/TNFSF13B/TVP23C/VGF	38
GO:0001825	BP	GO:0001825	blastocyst formation	6/1114	39/18866	0.0256529436514847	0.568710920207502	0.553451937848474	CNOT3/FURIN/HAND1/HOPX/SUPT6H/TM4SF1	6
GO:0034205	BP	GO:0034205	amyloid-beta formation	6/1114	39/18866	0.0256529436514847	0.568710920207502	0.553451937848474	ABCA2/ABCA7/EFNA1/GSK3A/HAP1/PSENEN	6
GO:0051931	BP	GO:0051931	regulation of sensory perception	6/1114	39/18866	0.0256529436514847	0.568710920207502	0.553451937848474	EDNRB/NMU/NMUR2/NPFF/OPRL1/OPRM1	6
GO:0019835	BP	GO:0019835	cytolysis	5/1114	29/18866	0.0258750423361421	0.571274082853507	0.555946328729759	APOL1/C8B/HRG/LBP/REG3G	5
GO:0007204	BP	GO:0007204	positive regulation of cytosolic calcium ion concentration	28/1114	322/18866	0.0263228938158293	0.573790541518438	0.558395268736244	ADCYAP1/AKAP6/BDKRB1/CACNB2/CASQ1/CCKBR/EDNRB/F2RL2/GIPR/GJA1/GPR20/GRIN1/HAP1/HTR2B/IL13/ITGAV/ITPR3/NMU/NMUR2/NOS1/NPFF/OPRL1/P2RY4/PLN/PRKACA/PROK2/PTK2B/TPCN1	28
GO:0016079	BP	GO:0016079	synaptic vesicle exocytosis	13/1114	121/18866	0.026417323402675	0.573790541518438	0.558395268736244	APBA1/CACNB2/CPLX1/P2RY4/PIP5K1C/PPFIA3/SLC4A8/STX1A/STXBP5L/SYN1/SYP/SYT1/VAMP2	13
GO:0098661	BP	GO:0098661	inorganic anion transmembrane transport	13/1114	121/18866	0.026417323402675	0.573790541518438	0.558395268736244	ANO9/APOL1/BEST1/CFTR/CLCN6/FXYD3/GABRA4/NMUR2/SLC17A1/SLC26A10/SLC26A6/SLC4A8/TTYH3	13
GO:0051896	BP	GO:0051896	regulation of protein kinase B signaling	23/1114	253/18866	0.0265435322489244	0.573790541518438	0.558395268736244	AKR1C3/AKT1/ARRB2/EGFR/FGF16/FGF22/FGF4/FGF7/IL18/LEMD2/MAZ/MST1R/MTDH/MYOC/OTUD3/P2RY12/PHLDA3/PIK3CD/RAPGEF1/RET/SRC/STK11/THBS1	23
GO:0030195	BP	GO:0030195	negative regulation of blood coagulation	7/1114	50/18866	0.0266307259716852	0.573790541518438	0.558395268736244	CD34/F12/FGA/HRG/KRT1/TFPI/THBS1	7
GO:0042987	BP	GO:0042987	amyloid precursor protein catabolic process	7/1114	50/18866	0.0266307259716852	0.573790541518438	0.558395268736244	ABCA2/ABCA7/AGER/EFNA1/GSK3A/HAP1/PSENEN	7
GO:0090276	BP	GO:0090276	regulation of peptide hormone secretion	20/1114	213/18866	0.0273377708816424	0.586668563120046	0.570927762412406	ADCYAP1/APLN/BMP8A/C2CD2L/CAPN10/CDK16/CFTR/EGFR/FGA/GIPR/GJA1/HNF4A/ITPR3/LRP5L/NMU/NPFF/RAPGEF3/STX1A/STXBP5L/UCN	20
GO:0052547	BP	GO:0052547	regulation of peptidase activity	38/1114	466/18866	0.0275982168596401	0.589898141242906	0.574070688294465	ABCA2/AGER/AKT1/AMBP/ARRB2/ATP13A2/CST11/CST5/CST8/EFNA1/FETUB/FURIN/GRIN1/HRG/ITIH2/LGALS9/LTF/LXN/MAPK12/MT3/PMAIP1/PSENEN/PSME3/PZP/SERPINA12/SERPINA4/SERPINB10/SFRP2/SOX2/SPINK13/SPINK2/SRC/TFPI/THBS1/TTBK1/WFDC8/WFDC9/WFIKKN2	38
GO:0010038	BP	GO:0010038	response to metal ion	31/1114	366/18866	0.0278971214428043	0.593771217289228	0.577839846520738	AKR1C3/AKT1/ATP13A2/C1QA/CA2/CACNA1H/D2HGDH/EGFR/FABP4/FGA/GDI1/GIPR/GSK3A/IL1A/ITPR3/KCNIP2/KCNMB1/KCNMB2/MT3/NFATC4/PLN/PPP5C/PTK2B/SLC30A1/SLC39A13/STAR/SYT1/SYT15/TFF1/THBS1/TSHB	31
GO:0043087	BP	GO:0043087	regulation of GTPase activity	39/1114	481/18866	0.0280007675627539	0.593771217289228	0.577839846520738	ACAP3/ADCYAP1/AGAP6/AGAP9/AGRN/ARFGAP2/ARHGAP33/ARHGAP4/ARHGEF11/ARRB2/DEPDC5/DVL3/EIF5/ELMOD3/EPHA3/GDI1/HTR2B/IQGAP3/MTSS2/NCKAP1L/PLXNA3/PROM2/PTK2B/RAB3GAP2/RANGAP1/RAPGEF1/RAPGEF3/RASGRF1/RGS18/RGS5/SBF1/SH3BP1/STXBP5L/TBC1D10B/TBC1D17/TBC1D19/TBC1D25/TNK2/VPS9D1	39
GO:0006006	BP	GO:0006006	glucose metabolic process	20/1114	214/18866	0.0285499122294356	0.598682252583944	0.582619114693945	AKT1/ALDOB/BRAT1/COX11/CRTC2/ENO2/GNMT/GSK3A/HK3/IGFBP4/INPPL1/LEPR/MST1/NPY1R/PKM/PMAIP1/RORC/SERPINA12/SOGA1/SRC	20
GO:0032200	BP	GO:0032200	telomere organization	17/1114	174/18866	0.0285742812350023	0.598682252583944	0.582619114693945	DHX36/DOT1L/H3C2/H3C6/H3C7/LTO1/MAP2K7/MAPK15/NEK7/PIF1/PPP1R10/RECQL4/SIRT6/SMG6/SRC/XRCC3/ZBTB48	17
GO:1902991	BP	GO:1902991	regulation of amyloid precursor protein catabolic process	6/1114	40/18866	0.0287229724186139	0.598682252583944	0.582619114693945	ABCA2/ABCA7/AGER/EFNA1/GSK3A/HAP1	6
GO:1900047	BP	GO:1900047	negative regulation of hemostasis	7/1114	51/18866	0.0293506714117396	0.598682252583944	0.582619114693945	CD34/F12/FGA/HRG/KRT1/TFPI/THBS1	7
GO:0006835	BP	GO:0006835	dicarboxylic acid transport	11/1114	98/18866	0.0296130659333584	0.598682252583944	0.582619114693945	APBA1/CPLX1/FOLR1/GJA1/PPFIA3/SLC13A5/SLC26A10/SLC26A6/STX1A/SYT1/VAMP2	11
GO:0010771	BP	GO:0010771	negative regulation of cell morphogenesis involved in differentiation	11/1114	98/18866	0.0296130659333584	0.598682252583944	0.582619114693945	ARHGAP4/EFNA1/EFNB3/GDI1/MAG/MT3/NFATC4/PLXNA3/POSTN/TNR/TRIM46	11
GO:0070252	BP	GO:0070252	actin-mediated cell contraction	13/1114	123/18866	0.0297192693646517	0.598682252583944	0.582619114693945	ACTN2/CACNB2/CCDC88C/FLNA/GJA1/KCNQ1/MYH7/PLN/RNF207/SCN2B/SCN3B/TCAP/TNNI3	13
GO:0046503	BP	GO:0046503	glycerolipid catabolic process	9/1114	74/18866	0.0297359804595193	0.598682252583944	0.582619114693945	APOA5/FAAH/FABP4/GDPD3/LYPLA2/PLIN5/PNPLA2/PNPLA4/PNPLA6	9
GO:0010921	BP	GO:0010921	regulation of phosphatase activity	17/1114	175/18866	0.0299785127444197	0.598682252583944	0.582619114693945	B3GAT3/CDK5RAP3/DMPK/HSP90B1/ITGA1/NCKAP1L/PPP1R10/PPP1R14A/PPP1R15A/PPP1R1B/PPP1R37/PPP1R9B/PPP2R1A/PPP2R5E/PPP6R2/TIPRL/TSKS	17
GO:0003334	BP	GO:0003334	keratinocyte development	3/1114	12/18866	0.0302409861044266	0.598682252583944	0.582619114693945	IFT74/KDF1/KRT2	3
GO:0010755	BP	GO:0010755	regulation of plasminogen activation	3/1114	12/18866	0.0302409861044266	0.598682252583944	0.582619114693945	CTSZ/F12/THBS1	3
GO:0032905	BP	GO:0032905	transforming growth factor beta1 production	3/1114	12/18866	0.0302409861044266	0.598682252583944	0.582619114693945	FURIN/LUM/THBS1	3
GO:0045117	BP	GO:0045117	azole transmembrane transport	3/1114	12/18866	0.0302409861044266	0.598682252583944	0.582619114693945	SLC28A1/SLC38A3/SLC38A5	3
GO:0045161	BP	GO:0045161	neuronal ion channel clustering	3/1114	12/18866	0.0302409861044266	0.598682252583944	0.582619114693945	AGRN/KCNIP2/MYOC	3
GO:0046322	BP	GO:0046322	negative regulation of fatty acid oxidation	3/1114	12/18866	0.0302409861044266	0.598682252583944	0.582619114693945	ACADVL/AKT1/PLIN5	3
GO:0071639	BP	GO:0071639	positive regulation of monocyte chemotactic protein-1 production	3/1114	12/18866	0.0302409861044266	0.598682252583944	0.582619114693945	AGER/LGALS9/SELENOK	3
GO:0072531	BP	GO:0072531	pyrimidine-containing compound transmembrane transport	3/1114	12/18866	0.0302409861044266	0.598682252583944	0.582619114693945	SLC28A1/SLC29A1/SLC29A2	3
GO:2000302	BP	GO:2000302	positive regulation of synaptic vesicle exocytosis	3/1114	12/18866	0.0302409861044266	0.598682252583944	0.582619114693945	CACNB2/SLC4A8/SYT1	3
GO:0006816	BP	GO:0006816	calcium ion transport	35/1114	426/18866	0.0304112934192768	0.599840401450075	0.583746189472187	AKAP6/ARRB2/BDKRB1/BEST1/CACNA1H/CACNA1I/CACNB2/CACNG6/CASQ1/GJA1/GRIN1/GRM6/HAP1/HTR2B/IL13/ITGAV/ITPR3/KCNN4/NMUR2/NOS1/OPRL1/OPRM1/P2RY12/PLN/PLPP4/PRKACA/PTK2B/S100A1/SELENOK/SLC30A1/SLN/TMC2/TPCN1/TSPAN13/UCN	35
GO:0045861	BP	GO:0045861	negative regulation of proteolysis	31/1114	369/18866	0.0307269817708495	0.603847095972922	0.587645381081217	AKT1/AMBP/ARRB2/CCAR2/CST11/CST5/CST8/CTSZ/EFNA1/FETUB/FURIN/HDAC6/HRG/ITIH2/LTF/LXN/MT3/PZP/SERPINA12/SERPINA4/SERPINB10/SFRP2/SPINK13/SPINK2/SRC/TFPI/THBS1/TRIM21/WFDC8/WFDC9/WFIKKN2	31
GO:0030072	BP	GO:0030072	peptide hormone secretion	23/1114	257/18866	0.031053639449292	0.603849426829665	0.587647649399154	ADCYAP1/APLN/BMP8A/C2CD2L/CAPN10/CDK16/CFTR/CPLX1/EGFR/FGA/GIPR/GJA1/HNF4A/ITPR3/LRP5L/NMU/NPFF/PTPRN/RAPGEF3/STX1A/STXBP5L/UCN/VGF	23
GO:0006874	BP	GO:0006874	cellular calcium ion homeostasis	37/1114	456/18866	0.0313759483981094	0.603849426829665	0.587647649399154	ADCYAP1/AKAP6/ATP13A2/ATP13A4/BDKRB1/CACNB2/CASQ1/CCKBR/DISC1/DMPK/EDNRB/F2RL2/GIPR/GJA1/GPR20/GRIN1/GRINA/HAP1/HSP90B1/HTR2B/IL13/ITGAV/ITPR3/NMU/NMUR2/NOS1/NPFF/OPRL1/P2RY4/PLN/PRKACA/PROK2/PTK2B/SELENOK/SLC30A1/TNNI3/TPCN1	37
GO:0019932	BP	GO:0019932	second-messenger-mediated signaling	37/1114	456/18866	0.0313759483981094	0.603849426829665	0.587647649399154	ADCYAP1/ADGRD1/ADGRL4/AKAP6/CASQ1/CD3E/CDC34/DGKD/DMPK/EDNRB/EGFR/GIPR/GPR26/GRIN1/GSK3A/GUCY1A1/HAP1/HTR2B/ITPR3/NFATC4/NMUR2/NOS1/OPRL1/OPRM1/P2RY12/PLN/PPP1R9B/PPP2R1A/PRKACA/PTK2B/RAPGEF3/SELENOK/SSTR4/TCP11/THBS1/TNNI3/UCN	37
GO:0051208	BP	GO:0051208	sequestering of calcium ion	13/1114	124/18866	0.0314782824335393	0.603849426829665	0.587647649399154	AKAP6/BDKRB1/CASQ1/HAP1/HSP90B1/HTR2B/IL13/ITPR3/NOS1/PLN/PRKACA/PTK2B/TPCN1	13
GO:0090277	BP	GO:0090277	positive regulation of peptide hormone secretion	11/1114	99/18866	0.0316085495549634	0.603849426829665	0.587647649399154	ADCYAP1/APLN/C2CD2L/CAPN10/CFTR/EGFR/FGA/GIPR/GJA1/NMU/UCN	11
GO:0070838	BP	GO:0070838	divalent metal ion transport	38/1114	471/18866	0.0317943709647446	0.603849426829665	0.587647649399154	AKAP6/ARRB2/BDKRB1/BEST1/CACNA1H/CACNA1I/CACNB2/CACNG6/CASQ1/GJA1/GRIN1/GRM6/HAP1/HTR2B/IL13/ITGAV/ITPR3/KCNN4/MT3/NMUR2/NOS1/OPRL1/OPRM1/P2RY12/PLN/PLPP4/PRKACA/PTK2B/S100A1/SELENOK/SLC30A1/SLC39A13/SLC39A2/SLN/TMC2/TPCN1/TSPAN13/UCN	38
GO:0007618	BP	GO:0007618	mating	6/1114	41/18866	0.0320250786058623	0.603849426829665	0.587647649399154	EDDM3A/EDNRB/GRIN1/OR2H2/PPP1R1B/PPP1R9B	6
GO:2000008	BP	GO:2000008	regulation of protein localization to cell surface	6/1114	41/18866	0.0320250786058623	0.603849426829665	0.587647649399154	ABCA2/ABCA7/ACTN2/AKT1/GBF1/GPM6B	6
GO:0009994	BP	GO:0009994	oocyte differentiation	7/1114	52/18866	0.0322519079977692	0.603849426829665	0.587647649399154	MEIOC/PABPC1L/PPP2R1A/PTK2B/SOHLH1/SOHLH2/ZGLP1	7
GO:0032616	BP	GO:0032616	interleukin-13 production	4/1114	21/18866	0.0323483438471696	0.603849426829665	0.587647649399154	IFNL1/IL18/IRF4/LGALS9	4
GO:0043651	BP	GO:0043651	linoleic acid metabolic process	4/1114	21/18866	0.0323483438471696	0.603849426829665	0.587647649399154	ABCD1/ALOXE3/CYP4A11/ELOVL3	4
GO:0061162	BP	GO:0061162	establishment of monopolar cell polarity	4/1114	21/18866	0.0323483438471696	0.603849426829665	0.587647649399154	GBF1/PRKCI/SH3BP1/SYNE4	4
GO:0070734	BP	GO:0070734	histone H3-K27 methylation	4/1114	21/18866	0.0323483438471696	0.603849426829665	0.587647649399154	EHMT2/H1-3/H1-4/SUPT6H	4
GO:0071498	BP	GO:0071498	cellular response to fluid shear stress	4/1114	21/18866	0.0323483438471696	0.603849426829665	0.587647649399154	CA2/PTK2B/SRC/SREBF2	4
GO:0003018	BP	GO:0003018	vascular process in circulatory system	18/1114	190/18866	0.0324154025958888	0.603849426829665	0.587647649399154	ACE2/ADCYAP1/AKT1/APLN/ECE1/EDNRB/EGFR/FGA/GJA1/GUCY1A1/HRH2/HTR2B/ITGA1/KCNMB1/KCNMB2/NOS1/SRC/UCN	18
GO:0003014	BP	GO:0003014	renal system process	13/1114	125/18866	0.033311356423195	0.618392481697029	0.601800502127289	AKR1C3/CD34/CYP4A11/EDNRB/GJA1/JCHAIN/KCNQ1/MLLT6/OPRL1/PCSK5/PKN1/PRKACA/WNK4	13
GO:0006356	BP	GO:0006356	regulation of transcription by RNA polymerase I	5/1114	31/18866	0.0336190088984772	0.619814373678111	0.6031842435755	DDX11/FLNA/MAF1/POLR2K/PWP1	5
GO:0032770	BP	GO:0032770	positive regulation of monooxygenase activity	5/1114	31/18866	0.0336190088984772	0.619814373678111	0.6031842435755	AKT1/GDNF/HTR2B/PTK2B/S100A1	5
GO:1905268	BP	GO:1905268	negative regulation of chromatin organization	8/1114	64/18866	0.0339939222241869	0.624580112098502	0.607822113309181	H1-3/H1-4/H1-5/MLLT6/NOC2L/SPI1/SUPT6H/UCN	8
GO:0051897	BP	GO:0051897	positive regulation of protein kinase B signaling	17/1114	178/18866	0.0344985981835108	0.631689348991588	0.614740603521514	AKR1C3/ARRB2/EGFR/FGF16/FGF22/FGF4/FGF7/IL18/MAZ/MST1R/MTDH/MYOC/P2RY12/PIK3CD/RET/SRC/THBS1	17
GO:0071320	BP	GO:0071320	cellular response to cAMP	7/1114	53/18866	0.0353385943736629	0.634694234840679	0.617664865808558	AKAP6/CFTR/KCNQ1/RAPGEF1/RAPGEF3/SLC26A6/STAR	7
GO:0097035	BP	GO:0097035	regulation of membrane lipid distribution	7/1114	53/18866	0.0353385943736629	0.634694234840679	0.617664865808558	ABCA2/ABCA7/ANO9/ATP10B/ATP8B1/GBA2/KCNN4	7
GO:0048015	BP	GO:0048015	phosphatidylinositol-mediated signaling	18/1114	192/18866	0.0354250285776889	0.634694234840679	0.617664865808558	AKT1/EGFR/EPOR/HTR2B/IL18/MAZ/MUC5AC/MYOC/NYAP2/PDGFC/PIK3CD/PIP5K1C/PIRT/PITPNM2/PLCB2/PLCD4/SERPINA12/SRC	18
GO:0090279	BP	GO:0090279	regulation of calcium ion import	6/1114	42/18866	0.0355644618552331	0.634694234840679	0.617664865808558	GRM6/PLN/PLPP4/SLC30A1/SLN/UCN	6
GO:0007188	BP	GO:0007188	adenylate cyclase-modulating G protein-coupled receptor signaling pathway	21/1114	233/18866	0.0356511561294123	0.634694234840679	0.617664865808558	ADCYAP1/ADGRD1/ADGRL4/CRHR2/FLNA/GABBR1/GALR3/GIPR/GPR26/GRM4/GRM6/GSK3A/NOS1/NPY1R/OPRL1/OPRM1/OXER1/P2RY12/PLN/SSTR4/VIPR1	21
GO:0009266	BP	GO:0009266	response to temperature stimulus	21/1114	233/18866	0.0356511561294123	0.634694234840679	0.617664865808558	ACADVL/AKT1/AKT1S1/ARRB2/CASQ1/CCAR2/CD34/CETN1/DHX36/FGF16/HTR2B/IL1A/LXN/MAP2K7/NOS1/PIRT/PRDM12/PRKACA/THBS1/UCP3/VGF	21
GO:0048545	BP	GO:0048545	response to steroid hormone	29/1114	346/18866	0.0366304002483453	0.634694234840679	0.617664865808558	ABCA2/ADCYAP1/AIF1/AKR1C3/ARID1A/ARRB2/ATP1A3/CA2/CALCOCO1/CPN1/CST11/EGFR/HDAC6/HNMT/KCTD6/KLF9/LOX/PPP1R9B/PPP5C/S100B/SAFB/SRC/SSTR4/STAR/TFPI/THBS1/UCN/UCP3/WBP2	29
GO:1901019	BP	GO:1901019	regulation of calcium ion transmembrane transporter activity	10/1114	89/18866	0.0367711513244861	0.634694234840679	0.617664865808558	AKAP6/CACNB2/CASQ1/HAP1/NOS1/OPRL1/PLN/PRKACA/S100A1/SLN	10
GO:0032411	BP	GO:0032411	positive regulation of transporter activity	12/1114	114/18866	0.0367758800996636	0.634694234840679	0.617664865808558	ACTN2/AKAP6/CACNB2/CASQ1/CFTR/HAP1/KCNIP2/LRRC52/PIRT/RNF207/S100A1/WNK4	12
GO:0098693	BP	GO:0098693	regulation of synaptic vesicle cycle	12/1114	114/18866	0.0367758800996636	0.634694234840679	0.617664865808558	APBA1/BRSK1/CACNB2/CPLX1/GRIPAP1/P2RY4/SLC4A8/STX1A/STXBP5L/SYN1/SYP/SYT1	12
GO:0017156	BP	GO:0017156	calcium-ion regulated exocytosis	8/1114	65/18866	0.0368392983194789	0.634694234840679	0.617664865808558	ARF1/CACNA1H/CACNA1I/STX1A/SYN2/SYT1/SYT15/VAMP2	8
GO:0031646	BP	GO:0031646	positive regulation of nervous system process	8/1114	65/18866	0.0368392983194789	0.634694234840679	0.617664865808558	GRIN1/MAG/NMU/OPRL1/PTK2B/S100B/STX1A/TNR	8
GO:0035308	BP	GO:0035308	negative regulation of protein dephosphorylation	8/1114	65/18866	0.0368392983194789	0.634694234840679	0.617664865808558	NCKAP1L/PPP1R10/PPP1R14A/PPP1R15A/PPP1R1B/PPP1R37/PPP1R9B/TIPRL	8
GO:0008202	BP	GO:0008202	steroid metabolic process	28/1114	332/18866	0.0369220262787433	0.634694234840679	0.617664865808558	ABCA2/ACADVL/AKR1C3/APOA5/APOL1/ATP8B1/CACNA1H/CFTR/CYP17A1/CYP2C9/CYP2D6/CYP8B1/DHRS2/DISP3/FASN/FAXDC2/GBA2/LCAT/LEPR/LMF1/MT3/MVD/RORC/SERPINA12/SF1/SLC22A24/SREBF2/STAR	28
GO:0030048	BP	GO:0030048	actin filament-based movement	15/1114	153/18866	0.0370824404327344	0.634694234840679	0.617664865808558	ACTN2/CACNB2/CCDC88C/FLNA/GJA1/KCNQ1/MYH7/MYO1A/MYO1H/PLN/RNF207/SCN2B/SCN3B/TCAP/TNNI3	15
GO:0002679	BP	GO:0002679	respiratory burst involved in defense response	3/1114	13/18866	0.0376261311854149	0.634694234840679	0.617664865808558	LBP/PIK3CD/SELENOK	3
GO:0007494	BP	GO:0007494	midgut development	3/1114	13/18866	0.0376261311854149	0.634694234840679	0.617664865808558	EDNRB/EGFR/RET	3
GO:0015801	BP	GO:0015801	aromatic amino acid transport	3/1114	13/18866	0.0376261311854149	0.634694234840679	0.617664865808558	ACE2/SLC38A3/SLC38A5	3
GO:0031650	BP	GO:0031650	regulation of heat generation	3/1114	13/18866	0.0376261311854149	0.634694234840679	0.617664865808558	APLN/EDNRB/NMU	3
GO:0032230	BP	GO:0032230	positive regulation of synaptic transmission, GABAergic	3/1114	13/18866	0.0376261311854149	0.634694234840679	0.617664865808558	CA2/CA7/HAP1	3
GO:0035563	BP	GO:0035563	positive regulation of chromatin binding	3/1114	13/18866	0.0376261311854149	0.634694234840679	0.617664865808558	DDX11/MED25/PYGO2	3
GO:0048711	BP	GO:0048711	positive regulation of astrocyte differentiation	3/1114	13/18866	0.0376261311854149	0.634694234840679	0.617664865808558	MAG/MIR142/TTBK1	3
GO:0060340	BP	GO:0060340	positive regulation of type I interferon-mediated signaling pathway	3/1114	13/18866	0.0376261311854149	0.634694234840679	0.617664865808558	IRF3/MAVS/NLRC5	3
GO:0071872	BP	GO:0071872	cellular response to epinephrine stimulus	3/1114	13/18866	0.0376261311854149	0.634694234840679	0.617664865808558	KCNQ1/PRKACA/STAR	3
GO:0051000	BP	GO:0051000	positive regulation of nitric-oxide synthase activity	4/1114	22/18866	0.0377449548199726	0.634694234840679	0.617664865808558	AKT1/HTR2B/PTK2B/S100A1	4
GO:0072503	BP	GO:0072503	cellular divalent inorganic cation homeostasis	39/1114	492/18866	0.0377971974879261	0.634694234840679	0.617664865808558	ADCYAP1/AKAP6/ATP13A2/ATP13A4/BDKRB1/CACNB2/CASQ1/CCKBR/DISC1/DMPK/EDNRB/F2RL2/GIPR/GJA1/GPR20/GRIN1/GRINA/HAP1/HSP90B1/HTR2B/IL13/ITGAV/ITPR3/MT3/NMU/NMUR2/NOS1/NPFF/OPRL1/P2RY4/PLN/PRKACA/PROK2/PTK2B/SELENOK/SLC30A1/SLC39A13/TNNI3/TPCN1	39
GO:0098810	BP	GO:0098810	neurotransmitter reuptake	5/1114	32/18866	0.0379751816186128	0.634694234840679	0.617664865808558	GDNF/GPM6B/NOS1/SLC29A1/SLC29A2	5
GO:1903959	BP	GO:1903959	regulation of anion transmembrane transport	5/1114	32/18866	0.0379751816186128	0.634694234840679	0.617664865808558	ACE2/AKT1/ANO9/CFTR/THBS1	5
GO:0072511	BP	GO:0072511	divalent inorganic cation transport	38/1114	478/18866	0.0384771937633553	0.641087405404973	0.623886502341427	AKAP6/ARRB2/BDKRB1/BEST1/CACNA1H/CACNA1I/CACNB2/CACNG6/CASQ1/GJA1/GRIN1/GRM6/HAP1/HTR2B/IL13/ITGAV/ITPR3/KCNN4/MT3/NMUR2/NOS1/OPRL1/OPRM1/P2RY12/PLN/PLPP4/PRKACA/PTK2B/S100A1/SELENOK/SLC30A1/SLC39A13/SLC39A2/SLN/TMC2/TPCN1/TSPAN13/UCN	38
GO:0003009	BP	GO:0003009	skeletal muscle contraction	6/1114	43/18866	0.0393456554624825	0.647184160396634	0.629819676375594	CASQ1/CCDC78/DMPK/MYH7/TCAP/TNNI3	6
GO:0017158	BP	GO:0017158	regulation of calcium ion-dependent exocytosis	6/1114	43/18866	0.0393456554624825	0.647184160396634	0.629819676375594	ARF1/CACNA1H/CACNA1I/STX1A/SYT1/SYT15	6
GO:0030517	BP	GO:0030517	negative regulation of axon extension	6/1114	43/18866	0.0393456554624825	0.647184160396634	0.629819676375594	ARHGAP4/MAG/MT3/PLXNA3/TNR/TRIM46	6
GO:0090207	BP	GO:0090207	regulation of triglyceride metabolic process	6/1114	43/18866	0.0393456554624825	0.647184160396634	0.629819676375594	APOA5/LMF1/PLIN5/PNPLA2/SERPINA12/THRSP	6
GO:0008361	BP	GO:0008361	regulation of cell size	17/1114	181/18866	0.0394993357397523	0.647184160396634	0.629819676375594	AKT1/AKT1S1/ANAPC2/ARHGAP4/CLCN6/DISC1/E2F4/GDI1/IQGAP3/KCNN4/MAG/MT3/PLXNA3/RET/TNR/TRIM46/UCN	17
GO:0006360	BP	GO:0006360	transcription by RNA polymerase I	8/1114	66/18866	0.0398404963944184	0.647184160396634	0.629819676375594	CAVIN1/DDX11/FLNA/MAF1/POLR2K/PWP1/RRN3P1/TAF1B	8
GO:0034394	BP	GO:0034394	protein localization to cell surface	8/1114	66/18866	0.0398404963944184	0.647184160396634	0.629819676375594	ABCA2/ABCA7/ACTN2/AKT1/FGF7/FLNA/GBF1/GPM6B	8
GO:2000378	BP	GO:2000378	negative regulation of reactive oxygen species metabolic process	8/1114	66/18866	0.0398404963944184	0.647184160396634	0.629819676375594	ABCD1/CD34/HDAC6/MPV17L/MT3/PAGE4/PLIN5/PTGIS	8
GO:0043406	BP	GO:0043406	positive regulation of MAP kinase activity	23/1114	264/18866	0.0403058365933666	0.647184160396634	0.629819676375594	AGER/DVL3/EGFR/GRM4/HTR2B/IQGAP3/ITGA1/MADD/MAP2K7/MAP4K1/MAPK8IP3/MST1R/PDGFC/PIK3R6/PKN1/PROK2/PTK2B/RAPGEF1/RET/SRC/TAB1/TAOK2/THBS1	23
GO:0048017	BP	GO:0048017	inositol lipid-mediated signaling	18/1114	196/18866	0.0420517519427465	0.647184160396634	0.629819676375594	AKT1/EGFR/EPOR/HTR2B/IL18/MAZ/MUC5AC/MYOC/NYAP2/PDGFC/PIK3CD/PIP5K1C/PIRT/PITPNM2/PLCB2/PLCD4/SERPINA12/SRC	18
GO:0050819	BP	GO:0050819	negative regulation of coagulation	7/1114	55/18866	0.0420830491926351	0.647184160396634	0.629819676375594	CD34/F12/FGA/HRG/KRT1/TFPI/THBS1	7
GO:0009648	BP	GO:0009648	photoperiodism	5/1114	33/18866	0.0426605173466672	0.647184160396634	0.629819676375594	FBXL17/FBXL22/FBXL6/FBXL8/NMU	5
GO:1902003	BP	GO:1902003	regulation of amyloid-beta formation	5/1114	33/18866	0.0426605173466672	0.647184160396634	0.629819676375594	ABCA2/ABCA7/EFNA1/GSK3A/HAP1	5
GO:0034976	BP	GO:0034976	response to endoplasmic reticulum stress	25/1114	294/18866	0.042964255160383	0.647184160396634	0.629819676375594	ACADVL/CDK5RAP3/CFTR/CUL7/DDX11/DNAJB2/EIF4G1/FBXO27/FBXO44/GRINA/GSK3A/HSP90B1/HYOU1/KLHDC3/PMAIP1/PPP1R15A/PSMC6/RASGRF1/RNF5/SELENOK/THBS1/TLN1/TMEM259/TSPYL2/UBXN6	25
GO:0019935	BP	GO:0019935	cyclic-nucleotide-mediated signaling	20/1114	224/18866	0.0429941578077351	0.647184160396634	0.629819676375594	ADCYAP1/ADGRD1/ADGRL4/AKAP6/CDC34/EDNRB/GIPR/GPR26/GSK3A/HTR2B/NOS1/OPRL1/OPRM1/PLN/PTK2B/RAPGEF3/SSTR4/TCP11/THBS1/UCN	20
GO:0006026	BP	GO:0006026	aminoglycan catabolic process	8/1114	67/18866	0.0430002611949113	0.647184160396634	0.629819676375594	AGRN/BCAN/CTBS/GPC6/LUM/LYG1/PGLYRP4/STAB2	8
GO:0031060	BP	GO:0031060	regulation of histone methylation	8/1114	67/18866	0.0430002611949113	0.647184160396634	0.629819676375594	H1-5/MLLT6/NSD1/NSD3/PRDM12/PYGO2/SUPT6H/ZNF335	8
GO:0036498	BP	GO:0036498	IRE1-mediated unfolded protein response	8/1114	67/18866	0.0430002611949113	0.647184160396634	0.629819676375594	ACADVL/CUL7/DDX11/GSK3A/HYOU1/KLHDC3/TLN1/TSPYL2	8
GO:0043279	BP	GO:0043279	response to alkaloid	11/1114	104/18866	0.0430299114981829	0.647184160396634	0.629819676375594	AIF1/GRIN1/HNMT/NPFF/OPRM1/PPP1R1B/PPP1R9B/PPP5C/PTK2B/RECQL5/STAR	11
GO:0097178	BP	GO:0097178	ruffle assembly	6/1114	44/18866	0.0433725113587602	0.647184160396634	0.629819676375594	AIF1/CARMIL2/EPS8L3/INPPL1/MTSS2/P2RY12	6
GO:0016570	BP	GO:0016570	histone modification	37/1114	468/18866	0.0435534353157606	0.647184160396634	0.629819676375594	CBX8/CRTC2/DOT1L/EHMT2/FBLL1/H1-3/H1-4/H1-5/HDAC10/HDAC6/HDAC7/IRF4/KAT5/MLLT6/MST1/MT3/NOC2L/NOS1/NSD1/NSD3/PKN1/PPP5C/PRDM12/PRMT8/PWP1/PYGO2/RBM14/RNF40/SIN3B/SIRT6/SPI1/SRCAP/SUPT6H/UCN/USP49/WBP2/ZNF335	37
GO:0055074	BP	GO:0055074	calcium ion homeostasis	37/1114	468/18866	0.0435534353157606	0.647184160396634	0.629819676375594	ADCYAP1/AKAP6/ATP13A2/ATP13A4/BDKRB1/CACNB2/CASQ1/CCKBR/DISC1/DMPK/EDNRB/F2RL2/GIPR/GJA1/GPR20/GRIN1/GRINA/HAP1/HSP90B1/HTR2B/IL13/ITGAV/ITPR3/NMU/NMUR2/NOS1/NPFF/OPRL1/P2RY4/PLN/PRKACA/PROK2/PTK2B/SELENOK/SLC30A1/TNNI3/TPCN1	37
GO:0051341	BP	GO:0051341	regulation of oxidoreductase activity	12/1114	117/18866	0.0435621941929903	0.647184160396634	0.629819676375594	AKT1/EGFR/GDNF/HDAC6/HTR2B/IL13/IL1A/MT3/PTK2B/RFK/S100A1/SZT2	12
GO:0001956	BP	GO:0001956	positive regulation of neurotransmitter secretion	4/1114	23/18866	0.0436255840802069	0.647184160396634	0.629819676375594	CACNB2/SLC4A8/STX1A/SYT1	4
GO:0010226	BP	GO:0010226	response to lithium ion	4/1114	23/18866	0.0436255840802069	0.647184160396634	0.629819676375594	FABP4/GSK3A/NFATC4/PTK2B	4
GO:0031639	BP	GO:0031639	plasminogen activation	4/1114	23/18866	0.0436255840802069	0.647184160396634	0.629819676375594	CTSZ/F12/FGA/THBS1	4
GO:0033139	BP	GO:0033139	regulation of peptidyl-serine phosphorylation of STAT protein	4/1114	23/18866	0.0436255840802069	0.647184160396634	0.629819676375594	IFNA14/IFNA17/PWP1/RET	4
GO:0035561	BP	GO:0035561	regulation of chromatin binding	4/1114	23/18866	0.0436255840802069	0.647184160396634	0.629819676375594	DDX11/MED25/NFATC4/PYGO2	4
GO:1902001	BP	GO:1902001	fatty acid transmembrane transport	4/1114	23/18866	0.0436255840802069	0.647184160396634	0.629819676375594	ABCD1/AKT1/THBS1/THRSP	4
GO:1902259	BP	GO:1902259	regulation of delayed rectifier potassium channel activity	4/1114	23/18866	0.0436255840802069	0.647184160396634	0.629819676375594	AKAP6/KCNS1/RNF207/VAMP2	4
GO:0030198	BP	GO:0030198	extracellular matrix organization	32/1114	395/18866	0.0436499291497185	0.647184160396634	0.629819676375594	ADAMTS4/ADAMTS7/ADAMTSL4/AGRN/BCAN/CARMIL2/COL23A1/COL3A1/COL4A6/COL8A1/COL9A2/COLQ/FGA/FURIN/GPM6B/ICAM5/ITGA1/ITGAL/ITGAV/LOX/LUM/MATN3/MATN4/NFKB2/NOX1/NTN4/POSTN/SFRP2/SLC2A10/THBS1/TNR/VIT	32
GO:0002791	BP	GO:0002791	regulation of peptide secretion	31/1114	381/18866	0.0442929648893507	0.647184160396634	0.629819676375594	ACHE/ADCYAP1/APLN/ARF1/ATP13A2/BMP8A/C2CD2L/CAPN10/CD34/CDK16/CFTR/EGFR/FGA/GIPR/GJA1/HNF4A/HTR2B/IL13/IL1A/IRF3/ITPR3/KCNN4/LRP5L/NMU/NPFF/OPRM1/RAPGEF3/SRC/STX1A/STXBP5L/UCN	31
GO:0043393	BP	GO:0043393	regulation of protein binding	19/1114	211/18866	0.0443537514136275	0.647184160396634	0.629819676375594	AKT1/ARRB2/CRMP1/CTSZ/DDX11/DISC1/DNAJB2/GOLGA2/LOX/MAPRE3/NFATC4/PIM2/PRKACA/PRMT8/SRC/SYMPK/TLE5/TTBK1/WFIKKN2	19
GO:0051098	BP	GO:0051098	regulation of binding	30/1114	367/18866	0.0449127162233653	0.647184160396634	0.629819676375594	AGER/AKT1/ARRB2/CRMP1/CTSZ/CYP2D6/DDX11/DISC1/DNAJB2/DOT1L/EIF4G1/GOLGA2/HAND1/IRF4/LOX/MAPRE3/MED25/NFATC4/NSD1/PIM2/PLN/PRKACA/PRMT8/PYGO2/SLN/SRC/SYMPK/TLE5/TTBK1/WFIKKN2	30
GO:0043062	BP	GO:0043062	extracellular structure organization	32/1114	396/18866	0.0449150580925769	0.647184160396634	0.629819676375594	ADAMTS4/ADAMTS7/ADAMTSL4/AGRN/BCAN/CARMIL2/COL23A1/COL3A1/COL4A6/COL8A1/COL9A2/COLQ/FGA/FURIN/GPM6B/ICAM5/ITGA1/ITGAL/ITGAV/LOX/LUM/MATN3/MATN4/NFKB2/NOX1/NTN4/POSTN/SFRP2/SLC2A10/THBS1/TNR/VIT	32
GO:0006479	BP	GO:0006479	protein methylation	17/1114	184/18866	0.045004602956034	0.647184160396634	0.629819676375594	BHMT/DOT1L/EHMT2/FAM86C1P/FBLL1/H1-3/H1-4/H1-5/MLLT6/NSD1/NSD3/PRDM12/PRMT8/PWP1/PYGO2/SUPT6H/ZNF335	17
GO:0008213	BP	GO:0008213	protein alkylation	17/1114	184/18866	0.045004602956034	0.647184160396634	0.629819676375594	BHMT/DOT1L/EHMT2/FAM86C1P/FBLL1/H1-3/H1-4/H1-5/MLLT6/NSD1/NSD3/PRDM12/PRMT8/PWP1/PYGO2/SUPT6H/ZNF335	17
GO:0106106	BP	GO:0106106	cold-induced thermogenesis	14/1114	144/18866	0.045548731397848	0.647184160396634	0.629819676375594	ACHE/ADCYAP1/CNOT3/ELOVL3/FABP4/GJA1/IL13/IL18/IRF4/LEPR/PDGFC/SIRT6/SLN/STK11	14
GO:0120161	BP	GO:0120161	regulation of cold-induced thermogenesis	14/1114	144/18866	0.045548731397848	0.647184160396634	0.629819676375594	ACHE/ADCYAP1/CNOT3/ELOVL3/FABP4/GJA1/IL13/IL18/IRF4/LEPR/PDGFC/SIRT6/SLN/STK11	14
GO:0007631	BP	GO:0007631	feeding behavior	11/1114	105/18866	0.04561542295383	0.647184160396634	0.629819676375594	ACE2/APLN/GALR3/GRIN1/LEPR/NMU/NMUR2/NPY1R/OPRL1/OPRM1/UCN	11
GO:0044070	BP	GO:0044070	regulation of anion transport	11/1114	105/18866	0.04561542295383	0.647184160396634	0.629819676375594	ABCA7/ACE2/AKT1/ANO9/CA2/CA7/CFTR/CYP4A11/SLC38A3/SSTR4/THBS1	11
GO:0062014	BP	GO:0062014	negative regulation of small molecule metabolic process	11/1114	105/18866	0.04561542295383	0.647184160396634	0.629819676375594	ACADVL/AKR1C3/AKT1/AP2A1/GSK3A/LEPR/MST1/PLIN5/SERPINA12/SIRT6/SOGA1	11
GO:0086002	BP	GO:0086002	cardiac muscle cell action potential involved in contraction	7/1114	56/18866	0.0457471931801689	0.647184160396634	0.629819676375594	CACNB2/FLNA/GJA1/KCNQ1/RNF207/SCN2B/SCN3B	7
GO:1905515	BP	GO:1905515	non-motile cilium assembly	7/1114	56/18866	0.0457471931801689	0.647184160396634	0.629819676375594	CCDC13/CEP250/CEP89/DISC1/HAP1/IFT74/TMEM17	7
GO:0032204	BP	GO:0032204	regulation of telomere maintenance	9/1114	80/18866	0.0458024361820431	0.647184160396634	0.629819676375594	DHX36/MAP2K7/MAPK15/NEK7/PIF1/PPP1R10/SIRT6/SMG6/SRC	9
GO:0003214	BP	GO:0003214	cardiac left ventricle morphogenesis	3/1114	14/18866	0.0458396982200785	0.647184160396634	0.629819676375594	GSK3A/HAND1/SFRP2	3
GO:0010896	BP	GO:0010896	regulation of triglyceride catabolic process	3/1114	14/18866	0.0458396982200785	0.647184160396634	0.629819676375594	APOA5/PLIN5/PNPLA2	3
GO:0014819	BP	GO:0014819	regulation of skeletal muscle contraction	3/1114	14/18866	0.0458396982200785	0.647184160396634	0.629819676375594	CASQ1/DMPK/MYH7	3
GO:0031936	BP	GO:0031936	negative regulation of chromatin silencing	3/1114	14/18866	0.0458396982200785	0.647184160396634	0.629819676375594	H1-3/H1-4/H1-5	3
GO:0035791	BP	GO:0035791	platelet-derived growth factor receptor-beta signaling pathway	3/1114	14/18866	0.0458396982200785	0.647184160396634	0.629819676375594	LOX/PDGFRL/SRC	3
GO:0038166	BP	GO:0038166	angiotensin-activated signaling pathway	3/1114	14/18866	0.0458396982200785	0.647184160396634	0.629819676375594	ACTN2/CA2/SRC	3
GO:0051917	BP	GO:0051917	regulation of fibrinolysis	3/1114	14/18866	0.0458396982200785	0.647184160396634	0.629819676375594	F12/HRG/THBS1	3
GO:0052803	BP	GO:0052803	imidazole-containing compound metabolic process	3/1114	14/18866	0.0458396982200785	0.647184160396634	0.629819676375594	CARNS1/HDC/HNMT	3
GO:0071285	BP	GO:0071285	cellular response to lithium ion	3/1114	14/18866	0.0458396982200785	0.647184160396634	0.629819676375594	FABP4/GSK3A/NFATC4	3
GO:0090128	BP	GO:0090128	regulation of synapse maturation	3/1114	14/18866	0.0458396982200785	0.647184160396634	0.629819676375594	ANAPC2/DISC1/NFATC4	3
GO:0110154	BP	GO:0110154	RNA decapping	3/1114	14/18866	0.0458396982200785	0.647184160396634	0.629819676375594	EDC4/PATL1/PATL2	3
GO:0110156	BP	GO:0110156	methylguanosine-cap decapping	3/1114	14/18866	0.0458396982200785	0.647184160396634	0.629819676375594	EDC4/PATL1/PATL2	3
GO:1901569	BP	GO:1901569	fatty acid derivative catabolic process	3/1114	14/18866	0.0458396982200785	0.647184160396634	0.629819676375594	ABCD1/CYP4A11/LYPLA2	3
GO:0051209	BP	GO:0051209	release of sequestered calcium ion into cytosol	12/1114	118/18866	0.046005370507514	0.647263137936287	0.629896534882815	AKAP6/BDKRB1/CASQ1/HAP1/HTR2B/IL13/ITPR3/NOS1/PLN/PRKACA/PTK2B/TPCN1	12
GO:1901215	BP	GO:1901215	negative regulation of neuron death	19/1114	212/18866	0.0461443568430764	0.647263137936287	0.629896534882815	AKT1/ARRB2/ATP13A2/CD34/EIF4G1/GDNF/GRIN1/HYOU1/IL13/MAG/MT3/NFATC4/PM20D1/PPP5C/PRKCI/PTK2B/STAR/TMEM259/UCN	19
GO:0044782	BP	GO:0044782	cilium organization	32/1114	397/18866	0.0462072286728049	0.647263137936287	0.629896534882815	ABLIM3/ATAT1/CCDC13/CELSR3/CEP250/CEP89/CFAP410/CNTROB/DCX/DISC1/DNAH1/E2F4/FLNA/HAP1/HAUS5/HDAC6/HOATZ/IFT74/KIF3C/MAPK15/NME8/ODF2/ONECUT2/PPP2R1A/PRKACA/SPEF2/STK36/TMEM17/TPGS1/TUBA1A/TUBB4A/WWTR1	32
GO:0019318	BP	GO:0019318	hexose metabolic process	22/1114	254/18866	0.0465471162223587	0.650326246179569	0.632877457409263	AKT1/ALDOB/BRAT1/COX11/CRTC2/ENO2/GNMT/GSK3A/HK3/IGFBP4/INPPL1/LEPR/MAN2A2/MAN2C1/MST1/NPY1R/PKM/PMAIP1/RORC/SERPINA12/SOGA1/SRC	22
GO:0030203	BP	GO:0030203	glycosaminoglycan metabolic process	15/1114	158/18866	0.0470287608218671	0.654202753434517	0.636649954782009	AGRN/AKT1/AP2A1/B3GAT3/BCAN/CHST5/GPC6/ITIH2/LUM/LYG1/PGLYRP4/PIM1/ST3GAL1/ST3GAL3/STAB2	15
GO:0014002	BP	GO:0014002	astrocyte development	6/1114	45/18866	0.0476481897319312	0.654202753434517	0.636649954782009	AGER/C1QA/EGFR/MIR142/MT3/TTBK1	6
GO:0072583	BP	GO:0072583	clathrin-dependent endocytosis	6/1114	45/18866	0.0476481897319312	0.654202753434517	0.636649954782009	AP2A1/AP2M1/DGKD/FCHO1/PIP5K1C/TNK2	6
GO:0030431	BP	GO:0030431	sleep	5/1114	34/18866	0.0476781503435035	0.654202753434517	0.636649954782009	CACNA1I/IL18/NMU/SLC29A1/STAR	5
GO:0042759	BP	GO:0042759	long-chain fatty acid biosynthetic process	5/1114	34/18866	0.0476781503435035	0.654202753434517	0.636649954782009	ACSBG2/ALOXE3/CYP2C9/CYP2D6/LTC4S	5
GO:0045907	BP	GO:0045907	positive regulation of vasoconstriction	5/1114	34/18866	0.0476781503435035	0.654202753434517	0.636649954782009	AKT1/EGFR/FGA/GJA1/HRH2	5
GO:0050715	BP	GO:0050715	positive regulation of cytokine secretion	5/1114	34/18866	0.0476781503435035	0.654202753434517	0.636649954782009	CD34/HTR2B/IL1A/IRF3/SRC	5
GO:0046928	BP	GO:0046928	regulation of neurotransmitter secretion	11/1114	106/18866	0.0483050848419017	0.656495967122362	0.638881639658001	APBA1/CACNB2/CPLX1/P2RY4/SLC30A1/SLC4A8/STX1A/STXBP5L/SYN1/SYP/SYT1	11
GO:0071868	BP	GO:0071868	cellular response to monoamine stimulus	11/1114	106/18866	0.0483050848419017	0.656495967122362	0.638881639658001	ARRB2/FLNA/GSK3A/HRH2/HTR2B/KCNQ1/KLF16/OPRM1/OR10H3/PRKACA/STAR	11
GO:0071870	BP	GO:0071870	cellular response to catecholamine stimulus	11/1114	106/18866	0.0483050848419017	0.656495967122362	0.638881639658001	ARRB2/FLNA/GSK3A/HRH2/HTR2B/KCNQ1/KLF16/OPRM1/OR10H3/PRKACA/STAR	11
GO:0018022	BP	GO:0018022	peptidyl-lysine methylation	13/1114	132/18866	0.0483347450164647	0.656495967122362	0.638881639658001	DOT1L/EHMT2/H1-3/H1-4/H1-5/MLLT6/NSD1/NSD3/PRDM12/PWP1/PYGO2/SUPT6H/ZNF335	13
GO:0051283	BP	GO:0051283	negative regulation of sequestering of calcium ion	12/1114	119/18866	0.0485413420110354	0.657637120932336	0.63999217537144	AKAP6/BDKRB1/CASQ1/HAP1/HTR2B/IL13/ITPR3/NOS1/PLN/PRKACA/PTK2B/TPCN1	12
GO:0051279	BP	GO:0051279	regulation of release of sequestered calcium ion into cytosol	9/1114	81/18866	0.0489496164687707	0.661497965629609	0.643749430425832	AKAP6/BDKRB1/CASQ1/HAP1/IL13/NOS1/PLN/PRKACA/PTK2B	9
GO:2000377	BP	GO:2000377	regulation of reactive oxygen species metabolic process	18/1114	200/18866	0.0495299237017876	0.662212288431717	0.644444587358869	ABCD1/ACE2/AGXT2/AIF1/AKR1C3/AKT1/CD34/EGFR/GRIN1/HDAC6/MPV17L/MT3/PAGE4/PLIN5/PTGIS/PTK2B/SZT2/THBS1	18
GO:0031667	BP	GO:0031667	response to nutrient levels	37/1114	473/18866	0.0495620459830942	0.662212288431717	0.644444587358869	ADCYAP1/AKR1C3/AKT1/BMP8A/BRSK1/CD3E/DEPDC5/EGFR/EHMT2/EIF4G1/FOLR1/GIPR/MT3/NMUR2/NPFF/OPRM1/PAGE4/PIM1/PKM/PMAIP1/POSTN/PRKAG3/PRL/SFRP2/SIRT6/SLC38A3/SLC6A19/SRC/SREBF2/STAR/SZT2/TSHB/UCN/UCP3/ULK1/VGF/WDR24	37
GO:0006576	BP	GO:0006576	cellular biogenic amine metabolic process	7/1114	57/18866	0.049609516515239	0.662212288431717	0.644444587358869	BHMT/CHKA/GDPD3/HDAC10/HDC/HNMT/TDO2	7
GO:0044380	BP	GO:0044380	protein localization to cytoskeleton	7/1114	57/18866	0.049609516515239	0.662212288431717	0.644444587358869	CEP250/CRIPT/DISC1/FAM83H/MAPRE3/MID1/PPP1R9B	7
GO:0033622	BP	GO:0033622	integrin activation	4/1114	24/18866	0.0499899304407913	0.662212288431717	0.644444587358869	P2RY12/PIEZO1/SRC/TLN1	4
GO:0051004	BP	GO:0051004	regulation of lipoprotein lipase activity	4/1114	24/18866	0.0499899304407913	0.662212288431717	0.644444587358869	APOA5/FURIN/LMF1/PCSK5	4
GO:1902993	BP	GO:1902993	positive regulation of amyloid precursor protein catabolic process	4/1114	24/18866	0.0499899304407913	0.662212288431717	0.644444587358869	ABCA2/AGER/EFNA1/GSK3A	4
GO:1903429	BP	GO:1903429	regulation of cell maturation	4/1114	24/18866	0.0499899304407913	0.662212288431717	0.644444587358869	EDNRB/PPP2R1A/RET/TCP11	4
GO:0008076	CC	GO:0008076	voltage-gated potassium channel complex	17/1157	88/19559	1.33553843464625e-05	0.00456673359378494	0.00434113439150715	DPP6/KCNA3/KCNAB3/KCNB2/KCND1/KCNF1/KCNIP2/KCNIP3/KCNK1/KCNMB1/KCNMB2/KCNN4/KCNQ1/KCNS1/LRRC52/STX1A/VAMP2	17
GO:0062023	CC	GO:0062023	collagen-containing extracellular matrix	48/1157	427/19559	1.47551973951048e-05	0.00456673359378494	0.00434113439150715	ACHE/ADAMTS4/ADAMTSL4/AGRN/AMBP/ANGPTL1/ASPN/C1QA/C1QC/COL23A1/COL3A1/COL4A6/COL8A1/COL9A2/COLQ/CTSZ/EMILIN3/F12/FGA/FRAS1/GPC6/HMCN1/HPX/HRG/HSP90B1/IL7/ITIH2/KRT1/LGALS9/LUM/MATN3/MATN4/MGP/MST1/MUC17/MYOC/NTN4/NTN5/PKM/POSTN/PZP/SFRP2/SPARCL1/TGM4/THBS1/TINAG/TNR/VIT	48
GO:1902495	CC	GO:1902495	transmembrane transporter complex	38/1157	322/19559	3.91811773935703e-05	0.00587429169471028	0.00558409838847555	ABCA2/ABCB6/AKAP6/ATP1A3/BEST1/CACNA1H/CACNA1I/CACNB2/CACNG6/CFTR/DPP6/GABRA4/GRIA4/GRIN1/KCNA3/KCNAB3/KCNB2/KCND1/KCNF1/KCNIP2/KCNIP3/KCNK1/KCNMB1/KCNMB2/KCNN4/KCNQ1/KCNS1/LRRC52/NOS1/PLN/PRKACA/PTK2B/SCN2B/SCN3B/SLC26A6/STX1A/TTYH3/VAMP2	38
GO:0034705	CC	GO:0034705	potassium channel complex	17/1157	96/19559	4.34053993002369e-05	0.00587429169471028	0.00558409838847555	DPP6/KCNA3/KCNAB3/KCNB2/KCND1/KCNF1/KCNIP2/KCNIP3/KCNK1/KCNMB1/KCNMB2/KCNN4/KCNQ1/KCNS1/LRRC52/STX1A/VAMP2	17
GO:0034703	CC	GO:0034703	cation channel complex	29/1157	221/19559	4.7449852138209e-05	0.00587429169471028	0.00558409838847555	AKAP6/CACNA1H/CACNA1I/CACNB2/CACNG6/DPP6/GRIA4/GRIN1/KCNA3/KCNAB3/KCNB2/KCND1/KCNF1/KCNIP2/KCNIP3/KCNK1/KCNMB1/KCNMB2/KCNN4/KCNQ1/KCNS1/LRRC52/NOS1/PRKACA/PTK2B/SCN2B/SCN3B/STX1A/VAMP2	29
GO:1990351	CC	GO:1990351	transporter complex	38/1157	330/19559	6.67242238749035e-05	0.00688371576309421	0.00654365634141597	ABCA2/ABCB6/AKAP6/ATP1A3/BEST1/CACNA1H/CACNA1I/CACNB2/CACNG6/CFTR/DPP6/GABRA4/GRIA4/GRIN1/KCNA3/KCNAB3/KCNB2/KCND1/KCNF1/KCNIP2/KCNIP3/KCNK1/KCNMB1/KCNMB2/KCNN4/KCNQ1/KCNS1/LRRC52/NOS1/PLN/PRKACA/PTK2B/SCN2B/SCN3B/SLC26A6/STX1A/TTYH3/VAMP2	38
GO:0016324	CC	GO:0016324	apical plasma membrane	40/1157	361/19559	0.000101645426190321	0.00898835983025836	0.00854432981058486	ACE2/AGER/AP2A1/ATP6V0D2/ATP8B1/C2CD2L/CA4/CD34/CEACAM7/CFTR/CYP4A11/EGFR/F2RL2/FOLR1/GJA1/GP2/KCNK1/LMO7/MFSD4B/MTDH/MUC17/MYO1A/P2RY4/PRKCI/PROM2/SHROOM1/SLC17A1/SLC17A3/SLC17A4/SLC22A8/SLC23A2/SLC26A6/SLC29A1/SLC34A3/SLC38A3/SLC4A2/SLC6A18/SLC6A19/SLC7A9/STXBP2	40
GO:0031526	CC	GO:0031526	brush border membrane	12/1157	58/19559	0.000122674680760639	0.0094919534238544	0.00902304559805223	ACE2/ATP8B1/CA4/FOLR1/KCNK1/SLC17A3/SLC26A6/SLC28A1/SLC34A3/SLC6A18/SLC6A19/SLC7A9	12
GO:0034702	CC	GO:0034702	ion channel complex	34/1157	299/19559	0.000200817998018121	0.0138118156414685	0.0131295041979099	AKAP6/BEST1/CACNA1H/CACNA1I/CACNB2/CACNG6/CFTR/DPP6/GABRA4/GRIA4/GRIN1/KCNA3/KCNAB3/KCNB2/KCND1/KCNF1/KCNIP2/KCNIP3/KCNK1/KCNMB1/KCNMB2/KCNN4/KCNQ1/KCNS1/LRRC52/NOS1/PRKACA/PTK2B/SCN2B/SCN3B/SLC26A6/STX1A/TTYH3/VAMP2	34
GO:0016529	CC	GO:0016529	sarcoplasmic reticulum	13/1157	71/19559	0.000238099642262203	0.0147383678560304	0.0140102842131128	AKAP6/CASQ1/CCDC78/DMPK/FSD2/HSP90B1/ITPR3/NOS1/PLN/S100A1/SLN/THBS1/TMEM109	13
GO:0005903	CC	GO:0005903	brush border	16/1157	106/19559	0.000486075883763938	0.027352815640898	0.0260015711984729	ACE2/ATP8B1/CA4/FOLR1/ITPR3/KCNK1/MYO1A/SCART1/SLC17A3/SLC26A6/SLC28A1/SLC34A3/SLC6A18/SLC6A19/SLC7A9/TMPRSS15	16
GO:0016528	CC	GO:0016528	sarcoplasm	13/1157	80/19559	0.000789037043428539	0.0407011608235221	0.0386905006382942	AKAP6/CASQ1/CCDC78/DMPK/FSD2/HSP90B1/ITPR3/NOS1/PLN/S100A1/SLN/THBS1/TMEM109	13
GO:0043204	CC	GO:0043204	perikaryon	20/1157	156/19559	0.000906633887486916	0.0431697212580308	0.0410371128020394	ADCYAP1/AIF1/CPLX1/CRMP1/DHX36/DMWD/ELAVL4/ENO2/FLNA/HDAC6/ITGA1/KCNB2/KCNK1/KIF5A/NPFF/OPRM1/PPP5C/PRPH/PTPRN/UCN	20
GO:0045177	CC	GO:0045177	apical part of cell	42/1157	433/19559	0.00114265445327877	0.0505216504699684	0.0480258525851753	ACE2/AGER/AP2A1/ATP6V0D2/ATP8B1/C2CD2L/CA2/CA4/CD34/CEACAM7/CFTR/CYP4A11/EGFR/F2RL2/FOLR1/GJA1/GP2/ITPR3/KCNK1/LMO7/MFSD4B/MTDH/MUC17/MYO1A/P2RY4/PRKCI/PROM2/SHROOM1/SLC17A1/SLC17A3/SLC17A4/SLC22A8/SLC23A2/SLC26A6/SLC29A1/SLC34A3/SLC38A3/SLC4A2/SLC6A18/SLC6A19/SLC7A9/STXBP2	42
GO:0150034	CC	GO:0150034	distal axon	32/1157	309/19559	0.00150451291264577	0.0619820368975654	0.0589200894919463	ACAP3/ADCYAP1/ARHGAP4/BRSK1/CPLX1/CRHR2/CRMP1/CTSZ/DISC1/ELAVL4/FLNA/FSCN3/GPRIN1/GRIN1/HAP1/KCNA3/KCNIP3/KIF21B/MAPK8IP3/NMU/NOS1/NPFF/PPP1R9B/PTK2B/PTPRN/RASGRF1/RNF40/SLC4A8/SYP/TAOK2/UCN/WHRN	32
GO:0043197	CC	GO:0043197	dendritic spine	21/1157	175/19559	0.00160212050139103	0.0619820368975654	0.0589200894919463	ACTN2/APBA1/ARHGAP33/ARRB2/CD3E/CRIPT/CTTNBP2/GRIA4/GRIN1/HAP1/KCND1/MPP2/MT3/NOS1/OPRM1/PPP1R1B/PPP1R9B/PRKACA/PTK2B/SEZ6/STRN4	21
GO:0005581	CC	GO:0005581	collagen trimer	13/1157	87/19559	0.00174894327034342	0.0634813884076273	0.06034537219601	C1QA/C1QC/C1QTNF2/C1QTNF6/COL23A1/COL3A1/COL4A6/COL8A1/COL9A2/COLEC10/COLQ/LOX/LUM	13
GO:0044309	CC	GO:0044309	neuron spine	21/1157	177/19559	0.00184598544642535	0.0634813884076273	0.06034537219601	ACTN2/APBA1/ARHGAP33/ARRB2/CD3E/CRIPT/CTTNBP2/GRIA4/GRIN1/HAP1/KCND1/MPP2/MT3/NOS1/OPRM1/PPP1R1B/PPP1R9B/PRKACA/PTK2B/SEZ6/STRN4	21
GO:0098862	CC	GO:0098862	cluster of actin-based cell projections	19/1157	159/19559	0.00273718326874092	0.0891745496500331	0.0847692768546356	ACE2/ATP8B1/CA4/ELMOD3/FOLR1/ITPR3/KCNK1/MYO1A/SCART1/SLC17A3/SLC26A6/SLC28A1/SLC34A3/SLC6A18/SLC6A19/SLC7A9/TMC2/TMPRSS15/WHRN	19
GO:0045095	CC	GO:0045095	keratin filament	13/1157	95/19559	0.00386148534980082	0.119512971576335	0.113608963712561	CASP14/EPPK1/FAM83H/KRT1/KRT2/KRT3/KRT6B/KRT74/KRT77/KRT82/KRTAP1-5/KRTAP4-2/KRTAP4-5	13
GO:0031253	CC	GO:0031253	cell projection membrane	33/1157	344/19559	0.00434120663137296	0.12796223356285	0.121640827415413	ABCA7/ACE2/AIF1/ATP8B1/CA4/CDHR1/EPS8L3/FOLR1/FSCN3/GABRA4/ITGAV/KCNK1/MPP2/MTSS2/NOX1/OPRM1/P2RY12/PIEZO1/PIP5K1C/PPP1R9B/PROM2/PSD4/SGCE/SLC17A3/SLC26A6/SLC28A1/SLC34A3/SLC6A18/SLC6A19/SLC7A9/SRC/TLN1/TMEM17	33
GO:0043209	CC	GO:0043209	myelin sheath	8/1157	47/19559	0.00585689949600494	0.159593355656896	0.151709354327362	CA2/ERMN/GDI1/ITPR3/MAG/PRKCI/TUBA1A/TUBB4A	8
GO:0016323	CC	GO:0016323	basolateral plasma membrane	25/1157	246/19559	0.0059299631342627	0.159593355656896	0.151709354327362	AP2A1/ARRB2/BEST1/CA11/CA2/CD34/EGFR/EPPK1/FOLR1/KCNQ1/LEPR/MST1R/MYO1A/P2RY12/P2RY4/PROM2/SLC22A8/SLC23A2/SLC26A10/SLC26A6/SLC29A1/SLC29A2/SLC38A3/SLC4A2/SLC6A13	25
GO:0044306	CC	GO:0044306	neuron projection terminus	17/1157	149/19559	0.00707331290562525	0.182432528690918	0.173420259396689	ADCYAP1/CPLX1/CRHR2/FLRT1/GRIN1/KCNA3/KCNIP3/NMU/NOS1/NPFF/PTPRN/RNF40/SLC4A8/SYP/SYT1/UCN/VAMP2	17
GO:0033017	CC	GO:0033017	sarcoplasmic reticulum membrane	7/1157	40/19559	0.0083374762084785	0.206435910921928	0.196237861075347	AKAP6/CASQ1/DMPK/NOS1/PLN/SLN/TMEM109	7
GO:0019005	CC	GO:0019005	SCF ubiquitin ligase complex	9/1157	63/19559	0.0114051503605929	0.271530310507962	0.258116560792366	FBXL17/FBXL19/FBXL22/FBXL4/FBXL6/FBXL8/FBXO27/FBXO44/TRIM21	9
GO:0031965	CC	GO:0031965	nuclear membrane	28/1157	301/19559	0.0120599593241283	0.276485734134644	0.262827183711021	AEN/AK9/AKAP6/DISP3/DMPK/DNAJB2/EDNRB/EGFR/EPHA3/FZR1/ITPR3/LEMD2/LMNB2/LTC4S/MATR3/MTDH/NPAP1/NPIPA1/PLCD4/QSOX2/RANGAP1/RNF13/SLC29A2/SLC30A1/STX1A/SYNE4/TMEM109/TMEM120B	28
GO:0031461	CC	GO:0031461	cullin-RING ubiquitin ligase complex	17/1157	162/19559	0.0155671469875184	0.319379609355601	0.303602077425017	ANAPC2/CUL7/DCAF15/DCAF17/DEPDC5/FBXL17/FBXL19/FBXL22/FBXL4/FBXL6/FBXL8/FBXO27/FBXO44/FZR1/KCTD13/TRIM21/ZER1	17
GO:0001518	CC	GO:0001518	voltage-gated sodium channel complex	4/1157	17/19559	0.0156001789747892	0.319379609355601	0.303602077425017	CACNA1H/CACNA1I/SCN2B/SCN3B	4
GO:0035859	CC	GO:0035859	Seh1-associated complex	4/1157	17/19559	0.0156001789747892	0.319379609355601	0.303602077425017	CASTOR3/DEPDC5/SZT2/WDR24	4
GO:0005788	CC	GO:0005788	endoplasmic reticulum lumen	28/1157	308/19559	0.0159947784976149	0.319379609355601	0.303602077425017	ADAMTS7/ADAMTSL4/APOA5/APOL1/ARSA/ARSK/CASQ1/COL23A1/COL3A1/COL4A6/COL8A1/COL9A2/CTSZ/FGA/GANAB/GBF1/HSP90B1/HYOU1/IGFBP4/ITIH2/MATN3/NUCB1/PDGFC/PNPLA2/SPARCL1/THBS1/VGF/WNT6	28
GO:0016471	CC	GO:0016471	vacuolar proton-transporting V-type ATPase complex	4/1157	18/19559	0.0191377791130335	0.353179894633301	0.335732609642063	ATP6V0A1/ATP6V0D2/ATP6V1G2/SPAAR	4
GO:0097440	CC	GO:0097440	apical dendrite	4/1157	18/19559	0.0191377791130335	0.353179894633301	0.335732609642063	FLNA/GSK3A/PTK2B/SEZ6	4
GO:0001891	CC	GO:0001891	phagocytic cup	5/1157	27/19559	0.0195169939541108	0.353179894633301	0.335732609642063	ABCA7/AIF1/PIP5K1C/SH3BP1/TRIP10	5
GO:0045178	CC	GO:0045178	basal part of cell	9/1157	69/19559	0.0199697840261155	0.353179894633301	0.335732609642063	BEST1/CD34/EGFR/GKN2/ITGA1/MST1R/MYO1A/P2RY12/SLC23A2	9
GO:0045121	CC	GO:0045121	membrane raft	29/1157	329/19559	0.0210075469555367	0.354777398173404	0.337251195610803	ACE2/AKAP6/CAVIN1/CDH15/EDNRB/EGFR/FURIN/GJA1/GPM6B/HDAC6/ITGA1/KCNA3/KCNQ1/LTB4R/LYPD4/MAG/MYO1A/NOS1/OPRM1/P2RY12/PRKACA/PROM2/PTGIS/PTK2B/RET/SRC/TFPI/TNR/TUBA1A	29
GO:0043679	CC	GO:0043679	axon terminus	14/1157	130/19559	0.0217006997372749	0.354777398173404	0.337251195610803	ADCYAP1/CPLX1/CRHR2/GRIN1/KCNA3/KCNIP3/NMU/NOS1/NPFF/PTPRN/RNF40/SLC4A8/SYP/UCN	14
GO:0098857	CC	GO:0098857	membrane microdomain	29/1157	330/19559	0.0217795494839893	0.354777398173404	0.337251195610803	ACE2/AKAP6/CAVIN1/CDH15/EDNRB/EGFR/FURIN/GJA1/GPM6B/HDAC6/ITGA1/KCNA3/KCNQ1/LTB4R/LYPD4/MAG/MYO1A/NOS1/OPRM1/P2RY12/PRKACA/PROM2/PTGIS/PTK2B/RET/SRC/TFPI/TNR/TUBA1A	29
GO:0005640	CC	GO:0005640	nuclear outer membrane	5/1157	28/19559	0.0226344386025887	0.359249166538522	0.341502056109232	DMPK/ITPR3/LTC4S/SYNE4/TMEM109	5
GO:0005938	CC	GO:0005938	cell cortex	27/1157	305/19559	0.0240763486015241	0.365265418145514	0.347221101510657	ACTN2/C2CD2L/CTSZ/CTTNBP2/ERMN/FGA/FLNA/FMNL1/HMCN1/KDF1/MISP/MOBP/MTSS2/MYO1A/NRBP1/OR2C1/PPFIA3/PPP1R9B/PTK2B/RAPGEF3/SEPTIN10/SH3BP1/SHROOM1/SPTBN5/STXBP6/TNFAIP2/TRIP10	27
GO:0098978	CC	GO:0098978	glutamatergic synapse	31/1157	361/19559	0.0241936706687658	0.365265418145514	0.347221101510657	ABLIM3/ACTN2/ADAM23/APBA1/ARF1/BCAN/CPLX1/CTTNBP2/DGKZ/DLGAP4/EFNB3/FLNA/GPC6/GRIN1/GRIPAP1/GUCY1A1/IL1RAPL2/KCNA3/P2RY4/PPFIA3/PPP1R1B/PPP2R1A/PRKCI/PTK2B/SLC4A8/SPARCL1/SRC/STX1A/SYN2/SYT1/TNR	31
GO:0005791	CC	GO:0005791	rough endoplasmic reticulum	10/1157	84/19559	0.0262056938860766	0.383176964879187	0.364247807784144	CA4/F12/MT3/MYOC/NUCB1/PKM/RP9/SEC61A2/SEC62/UBA1	10
GO:0001917	CC	GO:0001917	photoreceptor inner segment	8/1157	61/19559	0.0266181090303797	0.383176964879187	0.364247807784144	ARR3/ATP1A3/CEP250/ENO2/NOS1/RDH12/USH1G/WHRN	8
GO:0071682	CC	GO:0071682	endocytic vesicle lumen	4/1157	20/19559	0.027596146676249	0.388227608922685	0.369048947177589	HPX/HSP90B1/HYOU1/LTF	4
GO:0032391	CC	GO:0032391	photoreceptor connecting cilium	6/1157	40/19559	0.0289502744986879	0.391830438420743	0.372473794876618	CETN1/CFAP410/KIAA1549/SPTBN5/USH1G/WHRN	6
GO:0009925	CC	GO:0009925	basal plasma membrane	7/1157	51/19559	0.0296083490541704	0.391830438420743	0.372473794876618	BEST1/CD34/EGFR/MST1R/MYO1A/P2RY12/SLC23A2	7
GO:0033270	CC	GO:0033270	paranode region of axon	3/1157	12/19559	0.0303842666303646	0.391830438420743	0.372473794876618	CNTNAP1/ERMN/MAG	3
GO:0061700	CC	GO:0061700	GATOR2 complex	3/1157	12/19559	0.0303842666303646	0.391830438420743	0.372473794876618	CASTOR3/SZT2/WDR24	3
GO:0098644	CC	GO:0098644	complex of collagen trimers	4/1157	21/19559	0.0325377016453873	0.402529091789564	0.382643928765184	COL3A1/COL4A6/COL8A1/LUM	4
GO:0044298	CC	GO:0044298	cell body membrane	5/1157	31/19559	0.0338492366632021	0.402529091789564	0.382643928765184	ATP1A3/FLRT1/KCNB2/P2RY12/SLC4A8	5
GO:0098589	CC	GO:0098589	membrane region	29/1157	343/19559	0.0339711488346111	0.402529091789564	0.382643928765184	ACE2/AKAP6/CAVIN1/CDH15/EDNRB/EGFR/FURIN/GJA1/GPM6B/HDAC6/ITGA1/KCNA3/KCNQ1/LTB4R/LYPD4/MAG/MYO1A/NOS1/OPRM1/P2RY12/PRKACA/PROM2/PTGIS/PTK2B/RET/SRC/TFPI/TNR/TUBA1A	29
GO:0030427	CC	GO:0030427	site of polarized growth	18/1157	191/19559	0.0344355481272652	0.402529091789564	0.382643928765184	ACAP3/ARHGAP4/CRMP1/CTSZ/DISC1/ELAVL4/FLNA/FSCN3/GPRIN1/GRM6/HAP1/KIF21B/MAPK8IP3/PPP1R9B/PTK2B/RASGRF1/TAOK2/WHRN	18
GO:0031594	CC	GO:0031594	neuromuscular junction	9/1157	76/19559	0.0349221359168607	0.402529091789564	0.382643928765184	ACHE/CDH15/COLQ/DLGAP4/POSTN/PRKACA/STXBP5L/SYP/TUBA1A	9
GO:0044853	CC	GO:0044853	plasma membrane raft	12/1157	113/19559	0.0351156235163755	0.402529091789564	0.382643928765184	AKAP6/CAVIN1/CDH15/HDAC6/LYPD4/MYO1A/NOS1/P2RY12/PRKACA/PTGIS/SRC/TFPI	12
GO:0000118	CC	GO:0000118	histone deacetylase complex	9/1157	77/19559	0.0375539671297503	0.42265283006028	0.401773543072352	CHD3/GATAD2B/HDAC10/HDAC6/HDAC7/KAT5/RERE/SIN3B/SRCAP	9
GO:0036126	CC	GO:0036126	sperm flagellum	12/1157	115/19559	0.0394188722924529	0.435719320518363	0.414194541569195	AK8/CST11/DNAH1/NME8/ODF2/PRKACA/SLC26A6/SPEF2/TCP11/TPPP2/TSSK4/VPS13A	12
GO:0031252	CC	GO:0031252	cell leading edge	34/1157	421/19559	0.0409244659896424	0.444425341185765	0.422470479930011	ABCA7/ABLIM3/AIF1/ARF1/CARMIL2/CDC42BPB/DGKZ/DPP9/EPS8L3/FSCN3/GABRA4/GBF1/HDAC6/INPPL1/ITGAV/KDF1/MPP2/MTSS2/NRBP1/OPRM1/PARVB/PDLIM7/PIEZO1/PIP5K1C/PPP1R9B/PRKCI/PSD4/PTK2B/RAPGEF3/S100B/SGCE/SH3BP1/SRC/TLN1	34
GO:0030426	CC	GO:0030426	growth cone	17/1157	184/19559	0.0456657657298526	0.485243317442804	0.461272025253852	ACAP3/ARHGAP4/CRMP1/CTSZ/DISC1/ELAVL4/FLNA/FSCN3/GPRIN1/HAP1/KIF21B/MAPK8IP3/PPP1R9B/PTK2B/RASGRF1/TAOK2/WHRN	17
GO:0030864	CC	GO:0030864	cortical actin cytoskeleton	9/1157	80/19559	0.0462509785607842	0.485243317442804	0.461272025253852	ACTN2/MISP/MOBP/MTSS2/MYO1A/PPP1R9B/RAPGEF3/SHROOM1/SPTBN5	9
GO:0005875	CC	GO:0005875	microtubule associated complex	15/1157	159/19559	0.0498819553782345	0.5101132268967	0.48491334722431	ACTL9/DCX/DISC1/DNAH1/DNHD1/HAUS5/HDAC6/KIF21B/KIF3C/KIF5A/KIFC2/KLC2/MID1/NME8/TTBK1	15
GO:0099106	MF	GO:0099106	ion channel regulator activity	21/1144	119/18352	1.33763923945029e-05	0.0105840987756509	0.00994996376128714	AMBP/ANKRD36C/CACNG6/CFTR/DPP6/FLNA/FXYD3/KCNAB3/KCNIP2/KCNIP3/KCNMB1/KCNMB2/KCNS1/LRRC52/PLN/SCN3B/SLC30A1/STX1A/TNNI3/TSPAN13/WNK4	21
GO:0005244	MF	GO:0005244	voltage-gated ion channel activity	28/1144	197/18352	3.73117109714085e-05	0.0105840987756509	0.00994996376128714	CACNA1H/CACNA1I/CACNB2/CACNG6/CLCN6/GRIN1/ITGAV/KCNA3/KCNAB3/KCNB2/KCND1/KCNF1/KCNIP2/KCNIP3/KCNK1/KCNK16/KCNQ1/KCNS1/LRRC52/NOX1/OPRM1/PTK2B/SCN2B/SCN3B/SLC17A3/TMC2/TMEM109/TPCN1	28
GO:0022832	MF	GO:0022832	voltage-gated channel activity	28/1144	197/18352	3.73117109714085e-05	0.0105840987756509	0.00994996376128714	CACNA1H/CACNA1I/CACNB2/CACNG6/CLCN6/GRIN1/ITGAV/KCNA3/KCNAB3/KCNB2/KCND1/KCNF1/KCNIP2/KCNIP3/KCNK1/KCNK16/KCNQ1/KCNS1/LRRC52/NOX1/OPRM1/PTK2B/SCN2B/SCN3B/SLC17A3/TMC2/TMEM109/TPCN1	28
GO:0016247	MF	GO:0016247	channel regulator activity	23/1144	148/18352	4.43777726442384e-05	0.0105840987756509	0.00994996376128714	AMBP/ANKRD36C/CACNG6/CFTR/DPP6/FLNA/FXYD3/KCNAB3/KCNIP2/KCNIP3/KCNMB1/KCNMB2/KCNS1/LRRC52/NOS1/PLN/SCN2B/SCN3B/SLC30A1/STX1A/TNNI3/TSPAN13/WNK4	23
GO:0022836	MF	GO:0022836	gated channel activity	40/1144	337/18352	6.8614935053442e-05	0.0130917296081967	0.0123073525611648	ANO9/CACNA1H/CACNA1I/CACNB2/CACNG6/CFTR/CLCN6/GABRA4/GRIA4/GRIN1/ITGAV/ITPR3/KCNA3/KCNAB3/KCNB2/KCND1/KCNF1/KCNIP2/KCNIP3/KCNK1/KCNK16/KCNMB1/KCNMB2/KCNN4/KCNQ1/KCNS1/LRRC52/NMUR2/NOX1/OPRM1/PIEZO1/PTK2B/SCN2B/SCN3B/SLC17A3/TMC2/TMC7/TMEM109/TPCN1/TTYH3	40
GO:0022843	MF	GO:0022843	voltage-gated cation channel activity	20/1144	140/18352	0.000429563919973371	0.0466263913732131	0.0438328207546922	CACNA1H/CACNA1I/CACNB2/CACNG6/GRIN1/ITGAV/KCNA3/KCNAB3/KCNB2/KCND1/KCNF1/KCNIP2/KCNK1/KCNQ1/KCNS1/LRRC52/OPRM1/PTK2B/TMC2/TPCN1	20
GO:0008200	MF	GO:0008200	ion channel inhibitor activity	9/1144	38/18352	0.000433117219626149	0.0466263913732131	0.0438328207546922	AMBP/ANKRD36C/CFTR/KCNMB2/SCN3B/SLC30A1/STX1A/TNNI3/WNK4	9
GO:0042277	MF	GO:0042277	peptide binding	35/1144	308/18352	0.000435770216539795	0.0466263913732131	0.0438328207546922	ACHE/AGER/AP2M1/APBA1/ATP1A3/BDKRB1/C1QA/C2CD2L/CCKBR/CRHR2/ECE1/EDNRB/FURIN/GALR3/GIPR/GRIA4/GRIN1/KCNIP2/LBP/LEPR/NKTR/NMUR2/NPAP1/NPBWR1/OPRL1/OPRM1/PCSK5/POM121L12/PPIG/PTGES2/SEC61A2/SLC7A9/SSTR4/TAPBP/VIPR1	35
GO:0033218	MF	GO:0033218	amide binding	41/1144	381/18352	0.000462082182109158	0.0466263913732131	0.0438328207546922	ACADVL/ACBD4/ACHE/AGER/AP2M1/APBA1/ATP1A3/BDKRB1/C1QA/C2CD2L/CCKBR/CRHR2/ECE1/EDNRB/FASN/FOLR1/FURIN/GALR3/GIPR/GNMT/GRIA4/GRIN1/KCNIP2/LBP/LEPR/MAG/NKTR/NMUR2/NPAP1/NPBWR1/OPRL1/OPRM1/PCSK5/POM121L12/PPIG/PTGES2/SEC61A2/SLC7A9/SSTR4/TAPBP/VIPR1	41
GO:0016248	MF	GO:0016248	channel inhibitor activity	9/1144	39/18352	0.000532267932020927	0.0466263913732131	0.0438328207546922	AMBP/ANKRD36C/CFTR/KCNMB2/SCN3B/SLC30A1/STX1A/TNNI3/WNK4	9
GO:0044325	MF	GO:0044325	ion channel binding	19/1144	132/18352	0.000537620864890297	0.0466263913732131	0.0438328207546922	ACTN2/AKAP6/AP2M1/FLNA/GRINA/HAP1/KCNAB3/KCNIP2/KCNIP3/KCNQ1/LRRC52/NOS1/PIRT/PPP1R9B/RNF207/SCN3B/SRC/STX1A/TCAP	19
GO:0046873	MF	GO:0046873	metal ion transmembrane transporter activity	44/1144	428/18352	0.000767510190618294	0.0610170601541544	0.0573612879304199	ATP1A3/CACNA1H/CACNA1I/CACNB2/CACNG6/GRIN1/ITGAV/ITPR3/KCNA3/KCNAB3/KCNB2/KCND1/KCNF1/KCNIP2/KCNIP3/KCNK1/KCNK16/KCNMB1/KCNMB2/KCNN4/KCNQ1/KCNS1/LRRC52/OPRM1/SCN2B/SCN3B/SLC13A5/SLC17A1/SLC17A3/SLC17A4/SLC23A2/SLC28A1/SLC30A1/SLC31A1/SLC34A3/SLC39A13/SLC39A2/SLC4A8/SLC6A12/SLC6A13/SLC9A5/SLC9A8/TMC2/TPCN1	44
GO:0061135	MF	GO:0061135	endopeptidase regulator activity	24/1144	192/18352	0.000891681587257982	0.0654357103264704	0.0615151993800648	ABCA2/AMBP/CST11/CST5/CST8/FETUB/FURIN/HRG/ITIH2/LTF/LXN/MT3/PSME3/PZP/SERPINA12/SERPINA4/SERPINB10/SFRP2/SPINK13/SPINK2/TFPI/WFDC8/WFDC9/WFIKKN2	24
GO:0015459	MF	GO:0015459	potassium channel regulator activity	10/1144	53/18352	0.0014224155176705	0.0969274574184042	0.0911201519590427	DPP6/FLNA/KCNAB3/KCNIP2/KCNIP3/KCNMB1/KCNMB2/KCNS1/LRRC52/WNK4	10
GO:0005216	MF	GO:0005216	ion channel activity	43/1144	431/18352	0.00158054138289098	0.100522431951867	0.0944997374191661	ANO9/APOL1/ATP5MF/BEST1/CACNA1H/CACNA1I/CACNB2/CACNG6/CFTR/CLCN6/FXYD3/GABRA4/GRIA4/GRIN1/ITGAV/ITPR3/KCNA3/KCNAB3/KCNB2/KCND1/KCNF1/KCNIP2/KCNIP3/KCNK1/KCNK16/KCNMB1/KCNMB2/KCNN4/KCNQ1/KCNS1/LRRC52/NMUR2/OPRM1/PIEZO1/PTK2B/SCN2B/SCN3B/SLC17A3/SLC26A6/TMC2/TMC7/TPCN1/TTYH3	43
GO:0015267	MF	GO:0015267	channel activity	46/1144	479/18352	0.00237530759591895	0.138803455182625	0.130487193882375	ANO9/APOL1/ATP5MF/BEST1/CACNA1H/CACNA1I/CACNB2/CACNG6/CFTR/CLCN6/FXYD3/GABRA4/GJA1/GRIA4/GRIN1/ITGAV/ITPR3/KCNA3/KCNAB3/KCNB2/KCND1/KCNF1/KCNIP2/KCNIP3/KCNK1/KCNK16/KCNMB1/KCNMB2/KCNN4/KCNQ1/KCNS1/LRRC52/NMUR2/NOX1/OPRM1/PIEZO1/PTK2B/SCN2B/SCN3B/SLC17A3/SLC26A6/TMC2/TMC7/TMEM109/TPCN1/TTYH3	46
GO:0022803	MF	GO:0022803	passive transmembrane transporter activity	46/1144	480/18352	0.00247343683239478	0.138803455182625	0.130487193882375	ANO9/APOL1/ATP5MF/BEST1/CACNA1H/CACNA1I/CACNB2/CACNG6/CFTR/CLCN6/FXYD3/GABRA4/GJA1/GRIA4/GRIN1/ITGAV/ITPR3/KCNA3/KCNAB3/KCNB2/KCND1/KCNF1/KCNIP2/KCNIP3/KCNK1/KCNK16/KCNMB1/KCNMB2/KCNN4/KCNQ1/KCNS1/LRRC52/NMUR2/NOX1/OPRM1/PIEZO1/PTK2B/SCN2B/SCN3B/SLC17A3/SLC26A6/TMC2/TMC7/TMEM109/TPCN1/TTYH3	46
GO:0015077	MF	GO:0015077	monovalent inorganic cation transmembrane transporter activity	38/1144	381/18352	0.00288130186543119	0.141675733884203	0.133187383062276	ATP1A3/ATP5MF/ATP6V0A1/ATP6V0D2/ATP6V1G2/CACNA1H/CACNA1I/KCNA3/KCNAB3/KCNB2/KCND1/KCNF1/KCNIP2/KCNIP3/KCNK1/KCNK16/KCNMB1/KCNMB2/KCNN4/KCNQ1/KCNS1/LRRC52/SCN2B/SCN3B/SLC13A5/SLC17A1/SLC17A3/SLC17A4/SLC23A2/SLC28A1/SLC2A10/SLC34A3/SLC4A8/SLC6A12/SLC6A13/SLC9A5/SLC9A8/TPCN1	38
GO:0015081	MF	GO:0015081	sodium ion transmembrane transporter activity	19/1144	152/18352	0.00292226711992987	0.141675733884203	0.133187383062276	ATP1A3/CACNA1H/CACNA1I/KCNK1/SCN2B/SCN3B/SLC13A5/SLC17A1/SLC17A3/SLC17A4/SLC23A2/SLC28A1/SLC34A3/SLC4A8/SLC6A12/SLC6A13/SLC9A5/SLC9A8/TPCN1	19
GO:0004867	MF	GO:0004867	serine-type endopeptidase inhibitor activity	14/1144	98/18352	0.00297014117157659	0.141675733884203	0.133187383062276	AMBP/FURIN/HRG/ITIH2/PZP/SERPINA12/SERPINA4/SERPINB10/SPINK13/SPINK2/TFPI/WFDC8/WFDC9/WFIKKN2	14
GO:0005436	MF	GO:0005436	sodium:phosphate symporter activity	4/1144	11/18352	0.00347849041596931	0.150839993492487	0.141802575808892	SLC17A1/SLC17A3/SLC17A4/SLC34A3	4
GO:0019855	MF	GO:0019855	calcium channel inhibitor activity	4/1144	11/18352	0.00347849041596931	0.150839993492487	0.141802575808892	AMBP/SLC30A1/STX1A/TNNI3	4
GO:0017046	MF	GO:0017046	peptide hormone binding	9/1144	51/18352	0.00390525172682351	0.161983049886506	0.152278007837695	C2CD2L/CCKBR/CRHR2/ECE1/EDNRB/GALR3/GIPR/LEPR/VIPR1	9
GO:0005201	MF	GO:0005201	extracellular matrix structural constituent	20/1144	169/18352	0.00434425202388107	0.172684017949273	0.162337838787135	AGRN/ASPN/COL23A1/COL3A1/COL4A6/COL8A1/COL9A2/COLQ/EMILIN3/FGA/FRAS1/GP2/HMCN1/LUM/MATN3/MGP/MUC17/MUC5AC/POSTN/THBS1	20
GO:0017075	MF	GO:0017075	syntaxin-1 binding	6/1144	26/18352	0.00453189324216234	0.172937046120915	0.16257570704515	CPLX1/RNF40/STXBP2/SYP/SYT1/VAMP2	6
GO:0004866	MF	GO:0004866	endopeptidase inhibitor activity	21/1144	183/18352	0.00505732752892856	0.174135121312983	0.163702000837098	AMBP/CST11/CST5/CST8/FETUB/FURIN/HRG/ITIH2/LTF/LXN/MT3/PZP/SERPINA12/SERPINA4/SERPINB10/SPINK13/SPINK2/TFPI/WFDC8/WFDC9/WFIKKN2	21
GO:0005245	MF	GO:0005245	voltage-gated calcium channel activity	8/1144	44/18352	0.00528985095731997	0.174135121312983	0.163702000837098	CACNA1H/CACNA1I/CACNB2/CACNG6/ITGAV/OPRM1/TMC2/TPCN1	8
GO:0048365	MF	GO:0048365	Rac GTPase binding	11/1144	73/18352	0.00532410328427986	0.174135121312983	0.163702000837098	ARHGAP4/DVL3/ELMO3/FLNA/FMNL1/IQGAP3/MTSS2/NCKAP1L/NOX1/PKN1/SH3BP1	11
GO:0022804	MF	GO:0022804	active transmembrane transporter activity	34/1144	344/18352	0.00533829966093566	0.174135121312983	0.163702000837098	ABCA2/ABCA7/ABCB6/ABCD1/ATP13A2/ATP1A3/ATP6V0A1/ATP6V0D2/ATP6V1G2/CFTR/CLCN6/MFSD4B/SLC13A5/SLC17A1/SLC17A3/SLC17A4/SLC22A8/SLC23A2/SLC26A10/SLC26A6/SLC28A1/SLC2A10/SLC34A3/SLC38A3/SLC4A2/SLC4A8/SLC6A12/SLC6A13/SLC6A16/SLC6A18/SLC6A19/SLC9A5/SLC9A8/TAPBP	34
GO:0020037	MF	GO:0020037	heme binding	17/1144	138/18352	0.00547594721110009	0.174135121312983	0.163702000837098	ABCB6/AMBP/CYP17A1/CYP2C9/CYP2D6/CYP2S1/CYP4A11/CYP4B1/CYP8B1/GUCY1A1/HBD/HRG/NOS1/PTGES2/PTGIS/SRC/TDO2	17
GO:0042562	MF	GO:0042562	hormone binding	12/1144	84/18352	0.00572604474536177	0.175702126381409	0.165175120464482	ATP1A3/C2CD2L/CCKBR/CRHR2/ECE1/EDNRB/EGFR/GALR3/GIPR/LEPR/PKM/VIPR1	12
GO:0017048	MF	GO:0017048	Rho GTPase binding	19/1144	162/18352	0.00589357237338058	0.175702126381409	0.165175120464482	ARHGAP4/ARHGEF11/ARHGEF17/ARHGEF38/CDC42BPB/DVL3/ELMO3/FLNA/FMNL1/IQGAP3/KCTD13/MTSS2/NCKAP1L/NOX1/PKN1/PKN3/SH3BP1/STXBP6/TRIO	19
GO:0015271	MF	GO:0015271	outward rectifier potassium channel activity	4/1144	13/18352	0.00681794825289137	0.197100685856314	0.185291608021163	KCNA3/KCND1/KCNIP2/KCNQ1	4
GO:0030414	MF	GO:0030414	peptidase inhibitor activity	21/1144	189/18352	0.00728595408461743	0.204435299903677	0.1921867764735	AMBP/CST11/CST5/CST8/FETUB/FURIN/HRG/ITIH2/LTF/LXN/MT3/PZP/SERPINA12/SERPINA4/SERPINB10/SPINK13/SPINK2/TFPI/WFDC8/WFDC9/WFIKKN2	21
GO:0005267	MF	GO:0005267	potassium channel activity	15/1144	120/18352	0.00766927909091267	0.208526317092334	0.196032684721029	KCNA3/KCNAB3/KCNB2/KCND1/KCNF1/KCNIP2/KCNIP3/KCNK1/KCNK16/KCNMB1/KCNMB2/KCNN4/KCNQ1/KCNS1/LRRC52	15
GO:0070717	MF	GO:0070717	poly-purine tract binding	6/1144	29/18352	0.00797209986377543	0.208526317092334	0.196032684721029	DAZAP1/ELAVL4/HNRNPDL/PABPC1L/PABPC5/PATL1	6
GO:0050750	MF	GO:0050750	low-density lipoprotein particle receptor binding	5/1144	21/18352	0.00820550902424641	0.208526317092334	0.196032684721029	AP2A1/AP2M1/APOA5/HSP90B1/SYT1	5
GO:0019208	MF	GO:0019208	phosphatase regulator activity	13/1144	99/18352	0.00841810533141062	0.208526317092334	0.196032684721029	B3GAT3/DMPK/PPP1R10/PPP1R12C/PPP1R14A/PPP1R15A/PPP1R1B/PPP1R37/PPP1R9B/PPP2R1A/PPP2R5E/PPP6R2/SBF1	13
GO:0015079	MF	GO:0015079	potassium ion transmembrane transporter activity	18/1144	156/18352	0.00852466076163632	0.208526317092334	0.196032684721029	ATP1A3/KCNA3/KCNAB3/KCNB2/KCND1/KCNF1/KCNIP2/KCNIP3/KCNK1/KCNK16/KCNMB1/KCNMB2/KCNN4/KCNQ1/KCNS1/LRRC52/SLC9A5/SLC9A8	18
GO:0061134	MF	GO:0061134	peptidase regulator activity	24/1144	229/18352	0.00883699001456768	0.210762211847439	0.19813461822136	ABCA2/AMBP/CST11/CST5/CST8/FETUB/FURIN/HRG/ITIH2/LTF/LXN/MT3/PSME3/PZP/SERPINA12/SERPINA4/SERPINB10/SFRP2/SPINK13/SPINK2/TFPI/WFDC8/WFDC9/WFIKKN2	24
GO:0015562	MF	GO:0015562	efflux transmembrane transporter activity	4/1144	14/18352	0.00908021859170525	0.211281183816751	0.198622496537429	ABCB6/GJA1/SLC17A3/SLC26A6	4
GO:0016811	MF	GO:0016811	hydrolase activity, acting on carbon-nitrogen (but not peptide) bonds, in linear amides	10/1144	69/18352	0.0101038916221384	0.22950268113143	0.215752272232129	DARS1/FAAH/HDAC10/HDAC6/HDAC7/KLK3/PGLYRP4/PM20D1/SIN3B/SIRT6	10
GO:0046906	MF	GO:0046906	tetrapyrrole binding	17/1144	148/18352	0.0108324908268811	0.240330145321968	0.225931020428464	ABCB6/AMBP/CYP17A1/CYP2C9/CYP2D6/CYP2S1/CYP4A11/CYP4B1/CYP8B1/GUCY1A1/HBD/HRG/NOS1/PTGES2/PTGIS/SRC/TDO2	17
GO:0000149	MF	GO:0000149	SNARE binding	14/1144	115/18352	0.0122232506660986	0.259430277852015	0.243886788844662	CAPN10/CPLX1/GOLGA2/HECTD3/RNF40/STX1A/STXBP2/STXBP5L/SYP/SYT1/SYT15/TNFAIP2/TXLNA/VAMP2	14
GO:0005248	MF	GO:0005248	voltage-gated sodium channel activity	5/1144	23/18352	0.0122372772571705	0.259430277852015	0.243886788844662	CACNA1H/CACNA1I/SCN2B/SCN3B/TPCN1	5
GO:0015291	MF	GO:0015291	secondary active transmembrane transporter activity	24/1144	236/18352	0.0125335081723894	0.259934060792598	0.244360388166494	ATP1A3/CLCN6/MFSD4B/SLC13A5/SLC17A1/SLC17A3/SLC17A4/SLC22A8/SLC23A2/SLC26A10/SLC26A6/SLC28A1/SLC2A10/SLC34A3/SLC38A3/SLC4A2/SLC4A8/SLC6A12/SLC6A13/SLC6A16/SLC6A18/SLC6A19/SLC9A5/SLC9A8	24
GO:0015370	MF	GO:0015370	solute:sodium symporter activity	10/1144	72/18352	0.0134808346964549	0.273632261711022	0.25723787595475	SLC13A5/SLC17A1/SLC17A3/SLC17A4/SLC23A2/SLC28A1/SLC34A3/SLC4A8/SLC6A12/SLC6A13	10
GO:0008509	MF	GO:0008509	anion transmembrane transporter activity	33/1144	357/18352	0.0153939686562084	0.301032259228233	0.282996231780265	ABCD1/ANO9/APOL1/BEST1/CFTR/CLCN6/FXYD3/GABRA4/GJA1/NMUR2/SLC13A5/SLC17A1/SLC17A3/SLC17A4/SLC22A8/SLC23A2/SLC25A45/SLC26A10/SLC26A6/SLC2A10/SLC38A3/SLC38A5/SLC4A2/SLC4A8/SLC6A12/SLC6A13/SLC6A18/SLC6A19/SLC7A4/SLC7A9/SLC9A5/SLC9A8/TTYH3	33
GO:0019888	MF	GO:0019888	protein phosphatase regulator activity	11/1144	85/18352	0.0162566829010042	0.301032259228233	0.282996231780265	B3GAT3/DMPK/PPP1R10/PPP1R14A/PPP1R15A/PPP1R1B/PPP1R37/PPP1R9B/PPP2R1A/PPP2R5E/PPP6R2	11
GO:0022853	MF	GO:0022853	active ion transmembrane transporter activity	23/1144	229/18352	0.0163669791099252	0.301032259228233	0.282996231780265	ABCD1/ATP13A2/ATP1A3/ATP6V0A1/ATP6V0D2/ATP6V1G2/SLC13A5/SLC17A1/SLC17A3/SLC17A4/SLC22A8/SLC23A2/SLC26A10/SLC26A6/SLC28A1/SLC2A10/SLC34A3/SLC4A2/SLC4A8/SLC6A12/SLC6A13/SLC9A5/SLC9A8	23
GO:0015293	MF	GO:0015293	symporter activity	16/1144	143/18352	0.0165994951310831	0.301032259228233	0.282996231780265	MFSD4B/SLC13A5/SLC17A1/SLC17A3/SLC17A4/SLC23A2/SLC28A1/SLC2A10/SLC34A3/SLC38A3/SLC4A8/SLC6A12/SLC6A13/SLC6A16/SLC6A18/SLC6A19	16
GO:0004407	MF	GO:0004407	histone deacetylase activity	5/1144	25/18352	0.0174331232495694	0.301032259228233	0.282996231780265	HDAC10/HDAC6/HDAC7/SIN3B/SIRT6	5
GO:0005261	MF	GO:0005261	cation channel activity	31/1144	334/18352	0.017488878154312	0.301032259228233	0.282996231780265	ATP5MF/CACNA1H/CACNA1I/CACNB2/CACNG6/GRIA4/GRIN1/ITGAV/ITPR3/KCNA3/KCNAB3/KCNB2/KCND1/KCNF1/KCNIP2/KCNIP3/KCNK1/KCNK16/KCNMB1/KCNMB2/KCNN4/KCNQ1/KCNS1/LRRC52/OPRM1/PIEZO1/PTK2B/SCN2B/SCN3B/TMC2/TPCN1	31
GO:0005254	MF	GO:0005254	chloride channel activity	10/1144	75/18352	0.0176398522842991	0.301032259228233	0.282996231780265	ANO9/APOL1/BEST1/CFTR/CLCN6/FXYD3/GABRA4/NMUR2/SLC26A6/TTYH3	10
GO:0051015	MF	GO:0051015	actin filament binding	21/1144	206/18352	0.0181809488714995	0.301032259228233	0.282996231780265	ABLIM3/ACTN2/AIF1/CACNB2/CORO7/EGFR/ERMN/FLNA/FMNL1/FSCN3/IQGAP3/KLHL17/MISP/MYH7/MYO1A/MYO1H/NEXN/PPP1R9B/SHROOM1/TLN1/TNNI3	21
GO:0015103	MF	GO:0015103	inorganic anion transmembrane transporter activity	16/1144	145/18352	0.0187140545577395	0.301032259228233	0.282996231780265	ANO9/APOL1/BEST1/CFTR/CLCN6/FXYD3/GABRA4/NMUR2/SLC17A1/SLC17A3/SLC22A8/SLC26A10/SLC26A6/SLC4A2/SLC4A8/TTYH3	16
GO:0005253	MF	GO:0005253	anion channel activity	11/1144	87/18352	0.0190804615390653	0.301032259228233	0.282996231780265	ANO9/APOL1/BEST1/CFTR/CLCN6/FXYD3/GABRA4/NMUR2/SLC17A3/SLC26A6/TTYH3	11
GO:0008188	MF	GO:0008188	neuropeptide receptor activity	7/1144	45/18352	0.0203968766223863	0.301032259228233	0.282996231780265	GALR3/NMUR2/NPBWR1/NPY1R/NPY6R/OPRM1/SSTR4	7
GO:0048156	MF	GO:0048156	tau protein binding	7/1144	45/18352	0.0203968766223863	0.301032259228233	0.282996231780265	BRSK1/GSK3A/HDAC6/PPP5C/S100B/TAOK2/TTBK1	7
GO:0001965	MF	GO:0001965	G-protein alpha-subunit binding	5/1144	26/18352	0.0205048446799044	0.301032259228233	0.282996231780265	CCDC88C/HTR2B/NUCB1/OPRM1/PPP5C	5
GO:0033558	MF	GO:0033558	protein deacetylase activity	5/1144	26/18352	0.0205048446799044	0.301032259228233	0.282996231780265	HDAC10/HDAC6/HDAC7/SIN3B/SIRT6	5
GO:0042923	MF	GO:0042923	neuropeptide binding	5/1144	26/18352	0.0205048446799044	0.301032259228233	0.282996231780265	NMUR2/NPBWR1/OPRL1/OPRM1/SSTR4	5
GO:0070325	MF	GO:0070325	lipoprotein particle receptor binding	5/1144	26/18352	0.0205048446799044	0.301032259228233	0.282996231780265	AP2A1/AP2M1/APOA5/HSP90B1/SYT1	5
GO:0019869	MF	GO:0019869	chloride channel inhibitor activity	3/1144	10/18352	0.0208261311415759	0.301032259228233	0.282996231780265	CFTR/STX1A/WNK4	3
GO:0051880	MF	GO:0051880	G-quadruplex DNA binding	3/1144	10/18352	0.0208261311415759	0.301032259228233	0.282996231780265	DDX11/DHX36/PIF1	3
GO:0070016	MF	GO:0070016	armadillo repeat domain binding	3/1144	10/18352	0.0208261311415759	0.301032259228233	0.282996231780265	CALCOCO1/CHD8/STRN4	3
GO:0008528	MF	GO:0008528	G protein-coupled peptide receptor activity	16/1144	148/18352	0.0222647683572855	0.317023716609707	0.298029578011111	BDKRB1/CCKBR/CRHR2/EDNRB/F2RL2/GALR3/GIPR/LTB4R/NMUR2/NPBWR1/NPY1R/NPY6R/OPRL1/OPRM1/SSTR4/VIPR1	16
GO:0019905	MF	GO:0019905	syntaxin binding	10/1144	78/18352	0.0226752353056789	0.318120212964966	0.299060378954155	CPLX1/GOLGA2/HECTD3/RNF40/STXBP2/STXBP5L/SYP/SYT1/TXLNA/VAMP2	10
GO:0008066	MF	GO:0008066	glutamate receptor activity	5/1144	27/18352	0.0239094352313375	0.328619243187326	0.308930370953991	GRIA4/GRIN1/GRM4/GRM6/PTK2B	5
GO:0004857	MF	GO:0004857	enzyme inhibitor activity	34/1144	383/18352	0.0241125230850239	0.328619243187326	0.308930370953991	AMBP/CCAR2/CST11/CST5/CST8/FETUB/FURIN/HRG/ITIH2/LTF/LXN/MT3/PIF1/PLN/PPP1R10/PPP1R12C/PPP1R14A/PPP1R1B/PPP1R37/PPP1R9B/PZP/RNH1/SERPINA12/SERPINA4/SERPINB10/SLN/SPINK13/SPINK2/TFPI/TNK2/UCN/WFDC8/WFDC9/WFIKKN2	34
GO:0015108	MF	GO:0015108	chloride transmembrane transporter activity	12/1144	102/18352	0.0247745907159102	0.332886754126455	0.31294219851676	ANO9/APOL1/BEST1/CFTR/CLCN6/FXYD3/GABRA4/NMUR2/SLC26A10/SLC26A6/SLC4A8/TTYH3	12
GO:0005246	MF	GO:0005246	calcium channel regulator activity	7/1144	47/18352	0.0254029976872318	0.336589719355822	0.316423304525169	AMBP/CACNG6/PLN/SLC30A1/STX1A/TNNI3/TSPAN13	7
GO:0008525	MF	GO:0008525	phosphatidylcholine transporter activity	3/1144	11/18352	0.0273314964136783	0.343980052601154	0.323370853819026	ABCA7/PITPNM1/PITPNM2	3
GO:0140326	MF	GO:0140326	ATPase-coupled intramembrane lipid transporter activity	3/1144	11/18352	0.0273314964136783	0.343980052601154	0.323370853819026	ABCA2/ABCA7/ATP8B1	3
GO:1901474	MF	GO:1901474	azole transmembrane transporter activity	3/1144	11/18352	0.0273314964136783	0.343980052601154	0.323370853819026	SLC28A1/SLC38A3/SLC38A5	3
GO:0005326	MF	GO:0005326	neurotransmitter transmembrane transporter activity	4/1144	19/18352	0.0274431247496043	0.343980052601154	0.323370853819026	CPLX1/SLC29A1/SLC29A2/SLC6A16	4
GO:0001653	MF	GO:0001653	peptide receptor activity	16/1144	152/18352	0.0277635891512462	0.343980052601154	0.323370853819026	BDKRB1/CCKBR/CRHR2/EDNRB/F2RL2/GALR3/GIPR/LTB4R/NMUR2/NPBWR1/NPY1R/NPY6R/OPRL1/OPRM1/SSTR4/VIPR1	16
GO:0008144	MF	GO:0008144	drug binding	12/1144	104/18352	0.0283360760790886	0.346572007428853	0.325807514431626	CHKA/CYP2C9/CYP2D6/CYP4B1/DCAF15/DCK/FASN/FOLR1/HTR2B/MT3/NKTR/PPIG	12
GO:0008187	MF	GO:0008187	poly-pyrimidine tract binding	5/1144	29/18352	0.0317588810969554	0.383518640082221	0.360540528908808	DAZAP1/PABPC1L/PABPC5/PATL1/U2AF2	5
GO:1902936	MF	GO:1902936	phosphatidylinositol bisphosphate binding	13/1144	119/18352	0.0342487124060597	0.400436364228981	0.376444645617446	ACTN2/AKT1/AMER1/ATP13A2/GBF1/GSDMB/KCNQ1/MTSS2/PHLDA3/PIRT/STXBP6/SYT1/TPCN1	13
GO:0017022	MF	GO:0017022	myosin binding	9/1144	72/18352	0.0343332296638782	0.400436364228981	0.376444645617446	HAP1/IQGAP3/MOBP/MYOC/RAB6B/SHROOM1/SPTBN5/STX1A/STXBP5L	9
GO:0015269	MF	GO:0015269	calcium-activated potassium channel activity	3/1144	12/18352	0.0347878638084149	0.400436364228981	0.376444645617446	KCNMB1/KCNMB2/KCNN4	3
GO:1901505	MF	GO:1901505	carbohydrate derivative transmembrane transporter activity	8/1144	61/18352	0.0348388031771545	0.400436364228981	0.376444645617446	ABCD1/SLC17A1/SLC17A3/SLC17A4/SLC25A45/SLC28A1/SLC29A1/SLC29A2	8
GO:0008483	MF	GO:0008483	transaminase activity	4/1144	21/18352	0.0384113882482948	0.416915900315806	0.391936827837434	AGXT2/AMT/GOT1L1/OAT	4
GO:0015106	MF	GO:0015106	bicarbonate transmembrane transporter activity	4/1144	21/18352	0.0384113882482948	0.416915900315806	0.391936827837434	CFTR/SLC26A10/SLC26A6/SLC4A8	4
GO:0042165	MF	GO:0042165	neurotransmitter binding	4/1144	21/18352	0.0384113882482948	0.416915900315806	0.391936827837434	ACHE/GRIN1/SLC6A12/SLC6A13	4
GO:0140303	MF	GO:0140303	intramembrane lipid transporter activity	4/1144	21/18352	0.0384113882482948	0.416915900315806	0.391936827837434	ABCA2/ABCA7/ANO9/ATP8B1	4
GO:0016810	MF	GO:0016810	hydrolase activity, acting on carbon-nitrogen (but not peptide) bonds	13/1144	121/18352	0.0384576511821708	0.416915900315806	0.391936827837434	ADAD1/ALLC/APOBEC4/DARS1/FAAH/HDAC10/HDAC6/HDAC7/KLK3/PGLYRP4/PM20D1/SIN3B/SIRT6	13
GO:0015294	MF	GO:0015294	solute:cation symporter activity	11/1144	98/18352	0.0413925487970564	0.436378367155357	0.410233221688585	SLC13A5/SLC17A1/SLC17A3/SLC17A4/SLC23A2/SLC28A1/SLC2A10/SLC34A3/SLC4A8/SLC6A12/SLC6A13	11
GO:0017016	MF	GO:0017016	Ras GTPase binding	35/1144	415/18352	0.0426749887374258	0.436378367155357	0.410233221688585	ARHGAP4/ARHGEF11/ARHGEF17/ARHGEF38/CDC42BPB/DENND3/DVL3/ELMO3/FLNA/FMNL1/GDI1/IQGAP3/KCTD13/MADD/MOBP/MTSS2/NCKAP1L/NOX1/PKN1/PKN3/RAB3GAP2/RAB3IL1/RANGAP1/RAPGEF1/RAPGEF3/RASGRF1/SBF1/SH3BP1/STXBP5L/STXBP6/TBC1D10B/TBC1D17/TBC1D25/TRIO/ULK1	35
GO:0005452	MF	GO:0005452	inorganic anion exchanger activity	3/1144	13/18352	0.043178838475072	0.436378367155357	0.410233221688585	SLC22A8/SLC4A2/SLC4A8	3
GO:0036122	MF	GO:0036122	BMP binding	3/1144	13/18352	0.043178838475072	0.436378367155357	0.410233221688585	CER1/TCAP/UCMA	3
GO:0072542	MF	GO:0072542	protein phosphatase activator activity	3/1144	13/18352	0.043178838475072	0.436378367155357	0.410233221688585	B3GAT3/PPP1R15A/PPP2R5E	3
GO:0022839	MF	GO:0022839	ion gated channel activity	6/1144	42/18352	0.0444925109825493	0.436378367155357	0.410233221688585	ANO9/KCNMB1/KCNMB2/KCNN4/NMUR2/TTYH3	6
GO:1901682	MF	GO:1901682	sulfur compound transmembrane transporter activity	6/1144	42/18352	0.0444925109825493	0.436378367155357	0.410233221688585	ABCD1/GJA1/SLC26A10/SLC26A6/SLC6A13/SLC7A9	6
GO:0017049	MF	GO:0017049	GTP-Rho binding	4/1144	22/18352	0.0447063623933753	0.436378367155357	0.410233221688585	KCTD13/PKN1/PKN3/STXBP6	4
GO:0050321	MF	GO:0050321	tau-protein kinase activity	4/1144	22/18352	0.0447063623933753	0.436378367155357	0.410233221688585	BRSK1/GSK3A/TAOK2/TTBK1	4
GO:0048018	MF	GO:0048018	receptor ligand activity	40/1144	487/18352	0.0453974842788372	0.436378367155357	0.410233221688585	ADCYAP1/APLN/ARTN/BMP8A/CCL27/CER1/CMTM5/COLEC10/CXCL14/FGF16/FGF22/FGF4/FGF7/FNDC5/GDNF/IFNA14/IFNA17/IFNL1/IFNL2/IL13/IL18/IL19/IL1A/IL20/IL7/LEFTY1/NPFF/PDGFC/PRL/SFRP2/TFF1/TG/THNSL2/TNFSF13B/TNFSF18/TSHB/TYMP/UCN/VGF/WNT6	40
GO:0042626	MF	GO:0042626	ATPase-coupled transmembrane transporter activity	11/1144	100/18352	0.0468404136246771	0.436378367155357	0.410233221688585	ABCA2/ABCA7/ABCB6/ABCD1/ATP13A2/ATP1A3/ATP6V0A1/ATP6V0D2/ATP6V1G2/CFTR/TAPBP	11
GO:0005249	MF	GO:0005249	voltage-gated potassium channel activity	10/1144	88/18352	0.0468828493028871	0.436378367155357	0.410233221688585	KCNA3/KCNAB3/KCNB2/KCND1/KCNF1/KCNIP2/KCNK1/KCNQ1/KCNS1/LRRC52	10
GO:0030374	MF	GO:0030374	nuclear receptor transcription coactivator activity	7/1144	54/18352	0.0493292571597597	0.436378367155357	0.410233221688585	ACTN2/CALCOCO1/CCAR1/CCAR2/HELZ2/PKN1/RBM14	7
GO:0004497	MF	GO:0004497	monooxygenase activity	11/1144	101/18352	0.0497393020719942	0.436378367155357	0.410233221688585	AKR1C3/CYP17A1/CYP2C9/CYP2D6/CYP2S1/CYP4A11/CYP4B1/CYP8B1/FAXDC2/NOS1/PTGIS	11
