# Supplementary material for: The Identification and Analysis of a Novel Model Based on Ferroptosis-Related Genes for Predicting the Prognosis of Diffuse Large B-Cell Lymphomas
Source: Research Square preprint supplement (doi:10.21203/rs.3.rs-1119694/v1), 2021-12-09
Supplement: Supplementary file 2 [file a408b57b14ac690d2dd6b4cc.csv]

	logFC	AveExpr	t	P.Value	adj.P.Val	B	SYMBOL	change
E2F4	-1.22766313382382	10.4138819599109	-26.0660721126781	5.38453316801745e-92	7.27311357115475e-88	199.183016470839	E2F4	down-regulated
U2AF2	-1.5983815072579	11.4082048997773	-26.0379562556167	7.21503255905436e-92	7.27311357115475e-88	198.891767982344	U2AF2	down-regulated
SIRT6	-1.50743203420164	8.98003786191537	-25.7161311512537	2.06507651305704e-90	1.3878002526581e-86	195.55342046934	SIRT6	down-regulated
GSK3A	-1.24258283953072	9.25501781737194	-25.6788251003598	3.04808794838337e-90	1.53631252818393e-86	195.165900519389	GSK3A	down-regulated
SRRM2	-1.93748880493139	11.4977260579065	-25.5047779498329	1.8772440413995e-89	7.56942342373105e-86	193.356531444662	SRRM2	down-regulated
GRK2	-1.69108077152516	9.56904008908686	-25.3829874731617	6.70759637162955e-89	2.25386417414039e-85	192.089029985199	GRK2	down-regulated
OR7E104P	-1.78263845694969	10.4731002227172	-25.3298196245963	1.16990530773027e-88	3.36949441559286e-85	191.535348920178	OR7E104P	down-regulated
ACIN1	-2.02650246569894	9.26059020044544	-25.2313245916629	3.28042405334101e-88	8.26707866742601e-85	190.509082842763	ACIN1	down-regulated
FOLR1	4.20706937760986	10.7815723830735	25.1663727534634	6.47711968237512e-88	1.4509467768485e-84	189.83192926026	FOLR1	up-regulated
GANAB	-1.83252990654205	10.7251893095768	-25.123444484223	1.01560637397954e-87	2.04756401058015e-84	189.384213753173	GANAB	down-regulated
PPIG	2.47005042752039	10.3915857461025	24.955720692137	5.89504214219807e-87	1.0804540420805e-83	187.633696556972	PPIG	up-regulated
TBC1D10B	-1.55289550606483	10.1951224944321	-24.8955101586038	1.1088512672513e-86	1.76181507457924e-83	187.004803282449	TBC1D10B	down-regulated
CPSF7	-1.39521614635115	10.8067216035635	-24.8932025219846	1.13603471898865e-86	1.76181507457924e-83	186.980695248073	CPSF7	down-regulated
SEC61A2	-1.62540717836547	8.26968151447661	-24.7909837508581	3.32250718974118e-86	4.78464767516943e-83	185.91244326664	SEC61A2	down-regulated
ADPGK	-1.12409274209583	11.2858195991091	-24.7384843973301	5.76711611772724e-86	7.75138853663326e-83	185.363516139482	ADPGK	not-changed
PSME3	-1.31367941936767	11.215719376392	-24.7193386355912	7.05209183326971e-86	8.88607646565942e-83	185.163284373895	PSME3	down-regulated
LYPLA2	-1.32638568303837	10.4287995545657	-24.7107615009396	7.71716067126049e-86	8.95112325686853e-83	185.073574370598	LYPLA2	down-regulated
YIPF5	1.29173012527341	11.7534788418708	24.7074349514682	7.99167792389433e-86	8.95112325686853e-83	185.038779994974	YIPF5	up-regulated
EML3	-1.85597074965202	9.68395322939866	-24.6949039678895	9.11643194468085e-86	9.67349391772161e-83	184.907704334974	EML3	down-regulated
STRN4	-1.79847935971365	8.6761714922049	-24.5976509243491	2.53398211359052e-85	2.55438066960492e-82	183.890074081401	STRN4	down-regulated
FAXDC2	-1.88659403459931	10.5669109131403	-24.5268955333965	5.33311423618322e-85	5.12004362455666e-82	183.149322259174	FAXDC2	down-regulated
IRF3	-1.4829886657387	10.6050155902004	-24.4897361676118	7.88428641494802e-85	7.22523174598941e-82	182.760165416271	IRF3	down-regulated
CHD8	-1.62338779081329	9.88798440979955	-24.3777099924229	2.56351913273502e-84	2.24709170587264e-81	181.586429199168	CHD8	down-regulated
ARFGAP2	-1.48658965997215	10.6999844097996	-24.2522200797456	9.61274477291904e-84	8.07510614028419e-81	180.270710829114	ARFGAP2	down-regulated
INPPL1	-1.79397862398091	9.66413363028953	-24.0514523482557	7.98041856833003e-83	6.43572875024407e-80	178.163784001252	INPPL1	down-regulated
LYRM2	1.84140787432889	9.95360801781737	23.9491067631131	2.34950894442089e-82	1.82186345494114e-79	177.088845283983	LYRM2	up-regulated
TLN1	-2.66300538874527	8.76819376391982	-23.9269846254937	2.96738855916382e-82	2.21576002745562e-79	176.856419271187	TLN1	down-regulated
NUCB1	-2.20299646052893	10.0344365256125	-23.9162592301304	3.32306361593981e-82	2.39272448432009e-79	176.743723344764	NUCB1	down-regulated
CALCOCO1	-2.03698516603698	9.1789131403118	-23.8533410915623	6.45659761484342e-82	4.48867119009856e-79	176.082491829243	CALCOCO1	down-regulated
SNRNP70	-1.69571982501492	11.3324120267261	-23.8359105162457	7.76131042182645e-82	5.21585931381477e-79	175.899269292008	SNRNP70	down-regulated
IGHMBP2	-1.19617928017498	9.31338975501114	-23.8264257399887	8.57891345019829e-82	5.57933787320799e-79	175.799562677303	IGHMBP2	not-changed
EIF5	1.69298896400875	12.4106481069042	23.7356180098177	2.2386186825378e-81	1.41039972683264e-78	174.844726014938	EIF5	up-regulated
MLF2	-1.47311421753828	10.8511091314031	-23.5763035040787	1.20563936828013e-80	7.36572584966539e-78	173.168521386688	MLF2	down-regulated
THRAP3	-1.13590795386756	10.5696904231626	-23.5686320678443	1.30750170438223e-80	7.7531005476618e-78	173.08777544933	THRAP3	not-changed
LENG8	-2.5463225293299	9.40719376391982	-23.5491440144786	1.60668554260379e-80	9.25496777840999e-78	172.882640385718	LENG8	down-regulated
EIF4G1	-1.59405406641478	10.9123184855234	-23.5287409977335	1.99356085079751e-80	1.11644945313691e-77	172.667854416733	EIF4G1	down-regulated
RAB5B	-1.72087124676873	9.39778619153675	-23.4787619764781	3.38212004633906e-80	1.84288979065519e-77	172.141632115768	RAB5B	down-regulated
DCAF15	-2.24741630542852	8.36884409799555	-23.4636401912793	3.96876360901086e-80	2.10563797687548e-77	171.982393408357	DCAF15	down-regulated
FIZ1	-1.67863239212567	9.03435189309577	-23.4412566062565	5.0290862954479e-80	2.59977971288526e-77	171.74666509161	FIZ1	down-regulated
SPATA24	-1.52872815669119	10.4001559020045	-23.4165523959979	6.53124494836885e-80	3.29191073510161e-77	171.486470297791	SPATA24	down-regulated
CLPTM1	-2.05217953867568	9.72230957683742	-23.3646232228661	1.13143918307953e-79	5.56364521221131e-77	170.93943894785	CLPTM1	down-regulated
AP2M1	-1.28808981904951	11.7036859688196	-23.3607143409608	1.17922378796782e-79	5.66055494981408e-77	170.89825707009	AP2M1	down-regulated
CDK5RAP3	-1.45916349174787	11.5882561247216	-23.2992511533737	2.26004332138494e-79	1.05964496284749e-76	170.250623188594	CDK5RAP3	down-regulated
GS1-124K5.11	-1.52030336050904	9.40592873051225	-23.2893446681891	2.50991788827562e-79	1.15005578512556e-76	170.146223332369	GS1-124K5.11	down-regulated
STK11	-1.51109880691985	8.9886859688196	-23.2546025100328	3.62571071061014e-79	1.62439896970247e-76	169.780057590711	STK11	down-regulated
GDI1	-1.6039731954663	11.5007483296214	-23.2449180448572	4.01719905454887e-79	1.76066848127739e-76	169.677978527955	GDI1	down-regulated
C20orf27	-1.53983772121694	8.83883964365256	-23.192931204182	6.96617099624011e-79	2.98819092457866e-76	169.129942103821	C20orf27	down-regulated
PPP1R10	-1.54967868363492	9.95705567928731	-23.1802437154735	7.96796380300067e-79	3.34671079650618e-76	168.996175185355	PPP1R10	down-regulated
ZNF843	-1.51625016901968	8.50930734966592	-23.0861605407208	2.15849872152008e-78	8.88112096419722e-76	168.004025644743	ZNF843	down-regulated
AKAP8	-1.11647576058858	9.62235634743875	-23.0815092702681	2.26752863787934e-78	9.14312897365707e-76	167.954966430518	AKAP8	not-changed
FAM193B	-1.5967453569298	9.99061024498886	-23.0476296953042	3.24674061667965e-78	1.28348112887997e-75	167.597595660227	FAM193B	down-regulated
HMGXB3	-0.972379817061046	9.33382182628062	-23.0347472986717	3.72160560922126e-78	1.44290943629827e-75	167.46169662484	HMGXB3	not-changed
PTGES2	-1.49844501889044	8.63971269487751	-22.9904948938511	5.94832087071236e-78	2.26271881272513e-75	166.994818917601	PTGES2	down-regulated
EHBP1L1	-2.72658506661364	8.92203118040089	-22.9260866417804	1.17728210862396e-77	4.39540455406808e-75	166.315154318534	EHBP1L1	down-regulated
KRR1	1.40402773911315	10.7446057906459	22.8777117749028	1.96610017546953e-77	7.20700829775295e-75	165.804577784481	KRR1	up-regulated
BCAP29	1.51919188705508	10.2116436525612	22.8555851293777	2.48595015986614e-77	8.94986449518951e-75	165.571011365333	BCAP29	up-regulated
THUMPD3-AS1	-2.07892050109364	9.04387082405345	-22.7529114665576	7.38539501293551e-77	2.61222717290864e-74	164.486968969477	THUMPD3-AS1	down-regulated
SIN3B	-1.37092927023265	8.87922048997773	-22.7374632959143	8.70034942007757e-77	2.98710444562824e-74	164.323833059478	SIN3B	down-regulated
GIGYF1	-2.10587234042553	8.39318262806236	-22.7370174964781	8.74158832855842e-77	2.98710444562824e-74	164.31912520251	GIGYF1	down-regulated
EPOR	-1.94086456551998	9.52900222717149	-22.7313765628142	9.28061117824459e-77	3.11844003274315e-74	164.259553635763	EPOR	down-regulated
TAF1B	1.70936204016703	9.06139643652561	22.6566786298664	2.04990055217652e-76	6.77508934957881e-74	163.47059847621	TAF1B	up-regulated
GRINA	-2.45020950487175	9.80348775055679	-22.6467062176781	2.27868738907549e-76	7.40977684695982e-74	163.365256451341	GRINA	down-regulated
PPP1R9B	-2.49524577450785	9.41036748329621	-22.5930189186936	4.02804703295864e-76	1.28903898780126e-73	162.798083878556	PPP1R9B	down-regulated
SF1	-1.486408948101	11.7827216035635	-22.5886957264102	4.21714974176299e-76	1.32846806162006e-73	162.752408077544	SF1	down-regulated
GOLGA2	-1.36195301252734	9.5749710467706	-22.5804451216658	4.60303896685547e-76	1.42772105555035e-73	162.66523637701	GOLGA2	down-regulated
PIGS	-1.71244635116326	9.52975055679287	-22.5538433970754	6.10455001639017e-76	1.86475504364306e-73	162.384161620723	PIGS	down-regulated
GBF1	-1.31305633326705	9.25208017817372	-22.5367966662125	7.31523057098327e-76	2.20122930659095e-73	162.204033799064	GBF1	down-regulated
CDC34	-1.20594583416187	9.72035189309577	-22.5334649759377	7.57853731059902e-76	2.24692486351451e-73	162.168827766113	CDC34	down-regulated
PSMC6	1.29922093855637	12.4089554565702	22.5163797959529	9.08534713580642e-76	2.65463309572454e-73	161.988283073052	PSMC6	up-regulated
TOMM40	-1.18419894611256	9.87742316258352	-22.4652680070547	1.56303812652076e-75	4.50177309554072e-73	161.448116119111	TOMM40	not-changed
DOT1L	-1.76415941539073	8.7207416481069	-22.3908257714806	3.4451655238219e-75	9.78281438391173e-73	160.661250086361	DOT1L	down-regulated
MRPL38	-1.76423052296679	9.27755456570156	-22.3492399133104	5.35777129835385e-75	1.50025037702933e-72	160.221614105377	MRPL38	down-regulated
TOMM34	-1.08104293100019	9.75027394209354	-22.3402488858088	5.89452909437479e-75	1.62793974070808e-72	160.126556938967	TOMM34	not-changed
SMIM19	1.46382201232848	11.8926748329621	22.3245520019621	6.96373799674799e-75	1.89724218584373e-72	159.960597325823	SMIM19	up-regulated
PPM1G	-1.71502364287135	10.1312583518931	-22.29218094178	9.82075736651649e-75	2.63995052355119e-72	159.618325096013	PPM1G	down-regulated
TDP2	1.0603702525353	12.3214944320713	22.2867201955208	1.04071617359815e-74	2.76077352314636e-72	159.560583771618	TDP2	not-changed
LIMD2	-2.29268021475443	9.17758129175947	-22.2452209781787	1.61716814255724e-74	4.23425024962293e-72	159.121751091572	LIMD2	down-regulated
WNT6	-1.53275116325314	8.50852783964365	-22.2407022884712	1.69667861128486e-74	4.38547916437359e-72	159.073965708737	WNT6	down-regulated
HYOU1	-1.66582087890237	10.8616325167038	-22.2219967659201	2.06961309078338e-74	5.28170500294731e-72	158.876148512671	HYOU1	down-regulated
ATG12	1.23708415191888	10.6890890868597	22.2123798190384	2.29220823463143e-74	5.77665127730053e-72	158.774442767225	ATG12	up-regulated
DDX11	-1.75553939152913	10.1112160356347	-22.1958952601971	2.73088148031286e-74	6.79719771908488e-72	158.600102220033	DDX11	down-regulated
INO80E	-1.21973585205806	9.70320489977728	-22.1846613479873	3.07701934459418e-74	7.56533987882478e-72	158.481288784257	INO80E	down-regulated
LINC01000	-2.19468156691191	10.2040846325167	-22.1517958939404	4.36276081948014e-74	1.05973037206674e-71	158.133676437853	LINC01000	down-regulated
ODF2	-1.81926420759595	9.02164810690423	-22.1496809320823	4.46189716439901e-74	1.07090843727915e-71	158.111305996777	ODF2	down-regulated
POM121L12	-2.57339942334459	7.79779064587973	-22.136857569737	5.11311748226189e-74	1.2127713124692e-71	157.975668162752	POM121L12	down-regulated
ACADVL	-1.57575939550606	10.6983741648107	-22.1341837235508	5.26045046031624e-74	1.23320862477251e-71	157.947385356582	ACADVL	down-regulated
HGS	-1.40243276993439	10.6312650334076	-22.1147186159622	6.46900173152759e-74	1.49909820585434e-71	157.741486951851	HGS	down-regulated
SIRT3	-1.02781898985881	9.35635189309577	-22.0675949518232	1.06729905108836e-73	2.44520638284004e-71	157.242987210481	SIRT3	not-changed
BRD9	-1.34530248558363	10.2418218262806	-22.0617577306426	1.13559371834417e-73	2.57243875904907e-71	157.181234628872	BRD9	down-regulated
INTS3	-1.2005544442235	9.77533853006681	-22.0565434108021	1.20028840923196e-73	2.6887794020584e-71	157.126071186424	INTS3	down-regulated
WDR55	-0.892060926625581	9.8606859688196	-22.0233405954862	1.70809867663596e-73	3.77225527625688e-71	156.774798175236	WDR55	not-changed
PAX8	-0.997493736329288	9.75364365256125	-22.0221389447519	1.73004986900727e-73	3.77225527625688e-71	156.762084754369	PAX8	not-changed
PSMD3	-1.30194273215351	10.5007728285078	-22.021594349732	1.74009097114176e-73	3.77225527625688e-71	156.756322949447	PSMD3	down-regulated
ANAPC2	-1.36256770729767	9.42617594654788	-22.0151811995873	1.86281246124717e-73	3.99533638629832e-71	156.688471498367	ANAPC2	down-regulated
FKBP8	-2.44718242195268	7.98349220489978	-21.9937476681533	2.33931690224469e-73	4.96452295433214e-71	156.461697766571	FKBP8	down-regulated
SRP9	1.09786072777887	13.9302182628062	21.9925714446647	2.36874151080557e-73	4.97460391659906e-71	156.449252679823	SRP9	not-changed
VPS72	-1.16242581030026	10.1800601336303	-21.9501681846555	3.71730818125541e-73	7.72625260229797e-71	156.000585408322	VPS72	not-changed
KLHDC3	-1.5013181745874	9.54244543429844	-21.9474202620247	3.82747194781767e-73	7.87404713672979e-71	155.971508580881	KLHDC3	down-regulated
CCAR1	2.27579562537283	11.1034521158129	21.9274858687164	4.73068436403051e-73	9.63387146093122e-71	155.760570954603	CCAR1	up-regulated
HAUS5	-1.26175792404056	9.93166592427617	-21.8909986485869	6.97183907403963e-73	1.40559247571713e-70	155.374459667256	HAUS5	down-regulated
MVK	-0.872544482004376	9.87206013363029	-21.866897419037	9.00747317562925e-73	1.79801650191942e-70	155.119405501089	MVK	not-changed
SECISBP2	1.87923290912706	10.2728530066815	21.8648470233192	9.20594059137048e-73	1.81961733590804e-70	155.097706489645	SECISBP2	up-regulated
FASN	-1.68344020680056	9.31220935412027	-21.8600526838591	9.68724479515608e-73	1.89533905660554e-70	155.046968485653	FASN	down-regulated
PPP2R5E	1.30733012527342	11.1923140311804	21.8591844798188	9.77705777922606e-73	1.89533905660554e-70	155.037780330392	PPP2R5E	up-regulated
MTF1	-1.18051123483794	8.98671269487751	-21.8579603959314	9.90510202460804e-73	1.90187392302974e-70	155.02482589727	MTF1	not-changed
TMEM109	-1.25423288924239	10.2132694877506	-21.8567789674345	1.00302746146067e-72	1.90773930665175e-70	155.012322861079	TMEM109	down-regulated
KAT5	-1.20966412805726	9.83654565701559	-21.842114662215	1.17221963980319e-72	2.20870281851141e-70	154.857128884618	KAT5	down-regulated
CCDC88C	-1.90461833366474	10.1591202672606	-21.8265344503263	1.38335925723831e-72	2.58239870233163e-70	154.692237961364	CCDC88C	down-regulated
ZFC3H1	-1.15769455160072	10.653719376392	-21.8219420603177	1.45256657837601e-72	2.68671511804025e-70	154.643634328382	ZFC3H1	not-changed
ATP6V0A1	-1.50914796182143	9.8895434298441	-21.8075619780036	1.69248001047216e-72	3.10200813555721e-70	154.491440363193	ATP6V0A1	down-regulated
HDGFL1	-1.49678763173594	8.60963028953229	-21.7822343331056	2.21541550179117e-72	4.02387314699205e-70	154.22337336289	HDGFL1	down-regulated
MAF1	-1.30833004573473	10.4411625835189	-21.7812902280936	2.23776241879553e-72	4.02817215404793e-70	154.213380798599	MAF1	down-regulated
SKIV2L	-1.55221978524557	9.55128285077951	-21.7665642649917	2.6169907246673e-72	4.66912831858561e-70	154.057517058744	SKIV2L	down-regulated
SCAF1	-2.43059083316762	7.015	-21.7635413441149	2.70245739670623e-72	4.77931961184161e-70	154.025521221411	SCAF1	down-regulated
NUDCD2	1.33099984092265	11.2644677060134	21.7208132816251	4.25635755469085e-72	7.4619499704454e-70	153.573256004557	NUDCD2	up-regulated
TBC1D14	-1.06008723404256	10.2003340757238	-21.7038852201361	5.09564816255505e-72	8.85632436252348e-70	153.39407004345	TBC1D14	not-changed
TMEM259	-1.70228540465299	9.49337639198218	-21.6800314384833	6.56661232572524e-72	1.13153394101664e-69	153.141567975038	TMEM259	down-regulated
SMIM26	1.19206810499105	12.1613273942094	21.6731692494153	7.06361922634364e-72	1.20686124764673e-69	153.068927545312	SMIM26	not-changed
ZNF800	2.09495162060052	8.66170601336303	21.6710617627343	7.22368121360475e-72	1.22383728527299e-69	153.046618403585	ZNF800	up-regulated
DMWD	-1.54363726386957	9.16130957683742	-21.6540609550942	8.65486775051214e-72	1.45408990598396e-69	152.866651601591	DMWD	down-regulated
ACTR1A	-1.09380449393518	9.96862138084633	-21.6273749372577	1.14944214474166e-71	1.91519860166418e-69	152.584152326084	ACTR1A	not-changed
GTPBP2	-1.32289940345993	9.38303563474387	-21.6043247946745	1.46868082388958e-71	2.42705525331458e-69	152.340136000998	GTPBP2	down-regulated
RAVER1	-1.38891763770133	9.38505122494432	-21.5911634608075	1.68929148483102e-71	2.76892728664051e-69	152.200803208023	RAVER1	down-regulated
HELZ	-1.17268377411018	9.94173273942094	-21.5665957043561	2.19359829736488e-71	3.5665431671914e-69	151.940711146692	HELZ	not-changed
FBXL3	0.995649135016913	11.7627750556793	21.5467693223451	2.70842069317941e-71	4.36835756761521e-69	151.730810256915	FBXL3	not-changed
MIIP	-1.0145699343806	10.3033474387528	-21.5291988041723	3.26481697975181e-71	5.22396628006161e-69	151.544788911183	MIIP	not-changed
PNPLA6	-1.63334732551203	9.67117371937639	-21.5268937645916	3.34583004073399e-71	5.31143932686913e-69	151.520384945133	PNPLA6	down-regulated
CXXC1	-1.19634633127858	11.4023697104677	-21.5088932187808	4.0516688609217e-71	6.38169499258143e-69	151.329807511211	CXXC1	not-changed
TMED5	1.1894278981905	12.3578307349666	21.4728594538155	5.94358652304063e-71	9.28904247217226e-69	150.948298307964	TMED5	not-changed
FAM168B	-1.13857180353948	10.278846325167	-21.467284347153	6.30661760732267e-71	9.78059366009479e-69	150.889270650669	FAM168B	not-changed
OGFR	-1.18531727977729	9.57077951002227	-21.461636899323	6.69697401436275e-71	1.03066941300433e-68	150.829476817331	OGFR	not-changed
AK9	2.89821727977729	6.35521380846325	21.3899526730468	1.43533374239037e-70	2.19225481669183e-68	150.070481339162	AK9	up-regulated
ADRM1	-1.0325456154305	11.0352182628062	-21.370358775368	1.76786860845245e-70	2.67984955000075e-68	149.863014586004	ADRM1	not-changed
SH3GLB2	-1.52539634122092	8.45222048997773	-21.3628667701966	1.91448990848899e-70	2.88045007798854e-68	149.783686146979	SH3GLB2	down-regulated
COPS7B	-1.45826166235832	8.99920935412027	-21.3333370021887	2.62085241757136e-70	3.91400041412268e-68	149.471009914527	COPS7B	down-regulated
RBM14	-1.2174379996023	10.1937639198218	-21.3123729962907	3.27544539888251e-70	4.85560696226987e-68	149.249029788879	RBM14	down-regulated
PKM	-1.63757375223703	13.0156614699332	-21.2828656708548	4.48290037957285e-70	6.59706237609987e-68	148.936584481961	PKM	down-regulated
STX16	-1.17553139789223	11.2194521158129	-21.2813877742905	4.55391844368574e-70	6.65301085095277e-68	148.920935337274	STX16	not-changed
UBE2Z	-0.862260946510245	11.37685077951	-21.2748023705736	4.88429833390781e-70	7.08434091438241e-68	148.851203750353	UBE2Z	not-changed
TLE5	-1.35382147544244	10.2101870824053	-21.2601509661979	5.70788108989481e-70	8.21975647524066e-68	148.696062301046	TLE5	down-regulated
SYMPK	-1.60639140982304	9.802714922049	-21.2498836527216	6.36646468848794e-70	9.10314145990109e-68	148.587342917638	SYMPK	down-regulated
RANGAP1	-1.2474870749652	9.46432293986637	-21.2442500356528	6.75957438657804e-70	9.59716754984506e-68	148.52768907753	RANGAP1	down-regulated
ZNF384	-1.0849341022072	10.2566236080178	-21.222196218892	8.54640919144623e-70	1.20492416579544e-67	148.294162516965	ZNF384	not-changed
STXBP2	-1.27714627162458	9.68537416481069	-21.202472756342	1.05410708382299e-69	1.47582311923301e-67	148.085311048745	STXBP2	down-regulated
MLLT6	-1.7966165042752	10.3245189309577	-21.2015787817956	1.06417716107304e-69	1.47964660306163e-67	148.075844747994	MLLT6	down-regulated
CEP250	-1.21205072579041	9.31742093541203	-21.1957227334823	1.13256360379707e-69	1.56394622028444e-67	148.01383499243	CEP250	down-regulated
FAM204A	1.21604064426326	10.7156636971047	21.1761107163297	1.39524108056638e-69	1.91356839627883e-67	147.8061627903	FAM204A	up-regulated
USP19	-0.97249642075959	9.98238752783964	-21.1614284936669	1.63104380102591e-69	2.22185635624888e-67	147.650692046421	USP19	not-changed
ZHX1	1.32428856631538	9.38135412026726	21.1339977435549	2.18356883897297e-69	2.95455915184793e-67	147.360226201026	ZHX1	up-regulated
NCKAP1L	-1.42418462915092	11.2216169265033	-21.0872096038671	3.59152513294944e-69	4.82724921369292e-67	146.864783991983	NCKAP1L	down-regulated
CDK16	-1.3796594949294	9.05804677060134	-21.0865705640268	3.61601811796449e-69	4.82798286597895e-67	146.858017174323	CDK16	down-regulated
CNOT7	1.13491385961423	12.6856102449889	21.0422345965659	5.79449049152781e-69	7.68570544734816e-67	146.388543332257	CNOT7	not-changed
MAZ	-1.29813529528734	10.2769109131403	-21.0356337145648	6.21590150117395e-69	8.19077059903059e-67	146.31864686284	MAZ	down-regulated
C18orf21	1.25855802346391	10.8472004454343	21.0349109567725	6.26386621506413e-69	8.20037706246155e-67	146.310993616168	C18orf21	up-regulated
SLC39A13	-1.40245525949494	8.89773942093541	-21.0138797729634	7.83399461362626e-69	1.01897526067948e-66	146.088296018982	SLC39A13	down-regulated
GID8	-1.2528314774309	10.2094565701559	-20.997579918306	9.31687344702037e-69	1.20408644593191e-66	145.915698959626	GID8	down-regulated
PYROXD1	1.01847218134818	10.7320400890869	20.9897642484966	1.0124408058175e-68	1.30011586535583e-66	145.832940139139	PYROXD1	not-changed
PARP6	-0.882647067011348	10.4588663697105	-20.9762264082468	1.16922675871395e-68	1.49194814445772e-66	145.689590716326	PARP6	not-changed
NDUFB1	1.07390868960033	13.8605768374165	20.9032578344806	2.5405230032335e-68	3.22135121183589e-66	144.916954828519	NDUFB1	not-changed
PSD4	-1.21360475243588	9.72322494432071	-20.8995556482888	2.64254469860659e-68	3.32977147928796e-66	144.877754525213	PSD4	down-regulated
ZNF346	-0.995356790614425	9.27581959910913	-20.8982661508463	2.6790332852959e-68	3.35478199160563e-66	144.864100802483	ZNF346	not-changed
OS9	-1.10510646251741	11.5604432071269	-20.8951898553854	2.76813009335067e-68	3.4449549883977e-66	144.831527774782	OS9	not-changed
PRKACA	-1.80098876516206	9.21726057906459	-20.8436413777306	4.78925652361254e-68	5.9236932989296e-66	144.285720867379	PRKACA	down-regulated
MMUT	1.17011378007556	10.7772338530067	20.8286148054589	5.61912031632762e-68	6.90774906691958e-66	144.12661950051	MMUT	not-changed
PTPN9	-1.02382746072778	9.24273942093541	-20.8250179207726	5.83821978608901e-68	7.13359691559639e-66	144.088535925855	PTPN9	not-changed
PPP2R1A	-1.28799783257109	10.4480957683742	-20.8172111965425	6.34359473538441e-68	7.70441044940271e-66	144.005879187019	PPP2R1A	down-regulated
PNPLA2	-1.24419178763173	10.5326169265033	-20.8037419196485	7.32052418152413e-68	8.8376699415394e-66	143.863269072201	PNPLA2	down-regulated
DARS1	1.30701725989262	13.1847861915367	20.7994933180007	7.65885539105918e-68	9.19108235352048e-66	143.818285994105	DARS1	up-regulated
PDCD11	-1.04961662358322	9.87512026726058	-20.7830056565536	9.12661398536787e-68	1.08876724591125e-65	143.643720375393	PDCD11	not-changed
USP36	-1.01610103400278	9.80091982182628	-20.7635494726598	1.12244195876564e-67	1.32372249367616e-65	143.437728074673	USP36	not-changed
HECTD3	-1.36086098627957	9.65033407572383	-20.7635241174707	1.12274463775916e-67	1.32372249367616e-65	143.437459628863	HECTD3	down-regulated
MALAT1	2.32726870153111	14.0083296213808	20.7430354560239	1.396052953352e-67	1.63638509258893e-65	143.220539683874	MALAT1	up-regulated
SEC24C	-1.05206297474648	10.8318819599109	-20.7339556528298	1.53756600893235e-67	1.79184209861763e-65	143.124410203621	SEC24C	not-changed
UBA1	-1.75771936766753	12.7113429844098	-20.7313102492467	1.58143217690712e-67	1.83237092635772e-65	143.096402999613	UBA1	down-regulated
NEU3	-1.08644418373434	9.4820868596882	-20.6927011804332	2.38423235177256e-67	2.74677191109066e-65	142.687652264616	NEU3	not-changed
TRIM23	1.96651328295884	8.03145211581292	20.691405440913	2.41730933953774e-67	2.76905531786479e-65	142.67393465899	TRIM23	up-regulated
ACAD9	-0.855724358719437	10.273434298441	-20.6598496042173	3.38105994737733e-67	3.85116099429798e-65	142.339868248734	ACAD9	not-changed
SPI1	-2.30971895008947	8.3292561247216	-20.6513401702367	3.70124185466287e-67	4.19217623774484e-65	142.249784935534	SPI1	down-regulated
CTSZ	2.63163280970371	11.8198663697105	20.6480769045064	3.83191945685625e-67	4.31594012121111e-65	142.215239294417	CTSZ	up-regulated
FZR1	-1.43772048120898	8.4675144766147	-20.6287531803029	4.70594822650496e-67	5.2709234552537e-65	142.010676788337	FZR1	down-regulated
SAFB	-1.20332338437066	9.99804008908686	-20.6197189915071	5.18040195612378e-67	5.77028087499511e-65	141.915041721731	SAFB	down-regulated
SLC30A5	0.923748796977526	10.256855233853	20.6015394776709	6.28503814295482e-67	6.96223373626989e-65	141.722598272171	SLC30A5	not-changed
PHF8	-1.12966655398687	9.31460133630289	-20.5937256361617	6.8294857132788e-67	7.52400335876579e-65	141.639884373513	PHF8	not-changed
CRTC2	-1.52845331079738	9.44604008908686	-20.5889500875929	7.18519771525445e-67	7.8728679965894e-65	141.589332912317	CRTC2	down-regulated
AMPD2	-1.06411391926825	9.74061915367483	-20.586657166212	7.36251278081063e-67	8.02354703642827e-65	141.565061354157	AMPD2	not-changed
UVSSA	-1.68924149930404	9.34775501113586	-20.5812553183418	7.79773445059752e-67	8.45215721819874e-65	141.507880755328	UVSSA	down-regulated
PABPN1	-1.70404684827997	9.85239643652561	-20.5639497014998	9.37289768328962e-67	1.01051866413263e-64	141.324696978899	PABPN1	down-regulated
TBC1D22B	-1.14336796579837	9.16735189309577	-20.5586753273556	9.91349862090898e-67	1.0631172643412e-64	141.268867399486	TBC1D22B	not-changed
RAP1B	0.886816901968576	13.6774231625835	20.5482777960105	1.10722120475225e-66	1.18109453486826e-64	141.158810048201	RAP1B	not-changed
OGFOD2	-0.826023801948699	9.34306236080178	-20.5294673452579	1.35233479283994e-66	1.434969566234e-64	140.959706379959	OGFOD2	not-changed
LINC00491	-2.51809655995228	6.88566369710468	-20.52892394715	1.36016975758018e-66	1.43572683154838e-64	140.953954732294	LINC00491	down-regulated
NBEAL2	-2.11486997414992	9.34525167037862	-20.5087326121044	1.68583871552273e-66	1.77021845539863e-64	140.740240859825	NBEAL2	down-regulated
CUL7	-1.22807420958441	8.57235412026726	-20.5042332304182	1.76843537422492e-66	1.84732775024604e-64	140.692618304547	CUL7	down-regulated
ZFYVE27	-1.14014265261483	9.20904231625835	-20.4969637923205	1.91051800256021e-66	1.98546151802146e-64	140.615677467552	ZFYVE27	not-changed
POLDIP2	-0.868936428713466	10.8046904231626	-20.4640255384541	2.71155057967665e-66	2.80346519163389e-64	140.267064650156	POLDIP2	not-changed
NDUFA4	1.19519795187909	13.6769042316258	20.4339823384735	3.73174427596291e-66	3.83855593610654e-64	139.949108402643	NDUFA4	not-changed
ING3	1.02273098031416	10.3415167037862	20.4146747662066	4.58185726456063e-66	4.68907737618309e-64	139.744778849987	ING3	not-changed
IFNGR2	-1.10121280572678	11.7958819599109	-20.4078097012042	4.92869692987506e-66	5.0185585254147e-64	139.672128361615	IFNGR2	not-changed
RECQL4	-1.40978075164048	9.49355011135857	-20.3812445933767	6.53670133939967e-66	6.62243395495662e-64	139.391007647799	RECQL4	down-regulated
KLHDC4	-1.45144943328693	9.85220935412027	-20.3578305661558	8.38368234392342e-66	8.451170986792e-64	139.143243764576	KLHDC4	down-regulated
MADD	-1.30980276396898	9.72840534521158	-20.3381683612974	1.03321217360871e-65	1.03634779264304e-63	138.935189393485	MADD	down-regulated
PTBP1	-0.859398468880491	12.7941469933185	-20.3347106625212	1.07188661890626e-65	1.06981713484006e-63	138.898602770257	PTBP1	not-changed
PWP1	1.35471674289123	11.7651247216036	20.3171255549843	1.29215009842106e-65	1.28330237114615e-63	138.712534878367	PWP1	up-regulated
PKN1	-1.76443036388945	9.24256570155902	-20.304641057955	1.47548073563345e-65	1.45819446623069e-63	138.580440373258	PKN1	down-regulated
KXD1	-0.809252734141982	10.4705322939866	-20.2993379049263	1.56102240798741e-65	1.53520842767972e-63	138.524330378394	KXD1	not-changed
DAZAP1	-1.30840218731358	11.991583518931	-20.2967591094329	1.60439365875322e-65	1.57020293952057e-63	138.497045654663	DAZAP1	down-regulated
HDAC6	-1.29362064028634	10.0606881959911	-20.274525037377	2.03200294752261e-65	1.97418609938913e-63	138.261805860824	HDAC6	down-regulated
AGPAT1	-1.13703137800756	10.2090400890869	-20.2743050995646	2.03675764432786e-65	1.97418609938913e-63	138.259478939304	AGPAT1	not-changed
TSEN54	-1.40011041956651	10.0224187082405	-20.2586583864595	2.40518434238964e-65	2.32013978597692e-63	138.093940897085	TSEN54	down-regulated
ZNF692	-1.42411401869158	9.17584632516704	-20.2446680449669	2.79068820390236e-65	2.67919356566073e-63	137.945931424689	ZNF692	down-regulated
RNF6	1.10640093457943	12.0171269487751	20.2291317042427	3.29159625209824e-65	3.14511241888875e-63	137.781571385676	RNF6	not-changed
CACNG6	-1.24583012527342	9.09299777282851	-20.2182796176577	3.69389086140782e-65	3.49770124387525e-63	137.666769688009	CACNG6	down-regulated
IPO13	-0.939819308013531	8.92048106904232	-20.2182436038633	3.69530462251589e-65	3.49770124387525e-63	137.666388711011	IPO13	not-changed
PPP2R5D	-0.974066693179569	9.90149443207127	-20.2167974068729	3.75252595934745e-65	3.53526522740205e-63	137.651089937379	PPP2R5D	not-changed
CLN5	1.08501646450586	10.3914454342984	20.2085447221272	4.09642706536005e-65	3.84130539835925e-63	137.563788828209	CLN5	not-changed
ZKSCAN8	-1.24229125074567	9.53055679287305	-20.2019061047487	4.39580311635258e-65	4.10295308466595e-63	137.493563311057	ZKSCAN8	down-regulated
CHMP1A	-0.94425661165241	10.072719376392	-20.1941891608068	4.77140704724829e-65	4.43301094375911e-63	137.411932210268	CHMP1A	not-changed
RNH1	-1.3158476038974	11.2851625835189	-20.1586574460191	6.95972730746398e-65	6.43647074521933e-63	137.03609049338	RNH1	down-regulated
STRADA	-0.753162159475041	11.0327126948775	-20.1383055483195	8.6395522183692e-65	7.95351654221651e-63	136.820829524184	STRADA	not-changed
ESF1	2.23103404255319	9.18430957683742	20.1328152710681	9.15843674316855e-65	8.39287468995551e-63	136.762760943691	ESF1	up-regulated
FBXL4	1.41126683237225	8.74734966592428	20.1304749314618	9.38898649259427e-65	8.56521975914901e-63	136.738008293767	FBXL4	up-regulated
DND1	-1.10774826009147	9.29988195991091	-20.1299507998717	9.44140947725944e-65	8.57424578698323e-63	136.732464824514	DND1	not-changed
BAHD1	-1.11287059057469	8.51143207126949	-20.1252703767241	9.922707112233e-65	8.97092816545873e-63	136.682962718688	BAHD1	not-changed
ATP5PB	1.0377464505866	14.1130690423163	20.1111180195511	1.15324403879731e-64	1.03797111902645e-62	136.533284945988	ATP5PB	not-changed
GPR137	-1.33624070391728	7.85053229398664	-20.1028976352824	1.2584745426969e-64	1.12764912245832e-62	136.446347149604	GPR137	down-regulated
BSDC1	-0.949037283754219	9.65586636971047	-20.0854191929775	1.51521908151116e-64	1.34830245238063e-62	136.261503204082	BSDC1	not-changed
THUMPD1	1.22206726983496	10.8446169265033	20.0852402055207	1.51810255786123e-64	1.34830245238063e-62	136.259610357594	THUMPD1	up-regulated
HCFC1	-1.15095279379599	9.96015812917595	-20.0366677072621	2.54305306037466e-64	2.24870582237779e-62	135.745973924392	HCFC1	not-changed
STRIP1	-0.874705647245973	9.67462583518931	-20.0225546333301	2.95427315190304e-64	2.60092144172565e-62	135.59674569224	STRIP1	not-changed
DHX36	1.91281845297276	10.7730178173719	20.0209343343874	3.00555007609916e-64	2.63456065583631e-62	135.579613406979	DHX36	up-regulated
SPATS2	1.70010489162856	9.57031625835189	20.0132919749277	3.25966118368876e-64	2.8449363257294e-62	135.498807681346	SPATS2	up-regulated
WDR89	-0.9835679459137	9.28095322939866	-20.0106573672121	3.35215251547655e-64	2.90211914158328e-62	135.470951310514	WDR89	not-changed
FXR2	-0.993133207397092	9.24930066815145	-20.0106063458641	3.35396934670356e-64	2.90211914158328e-62	135.470411850939	FXR2	not-changed
TELO2	-1.16585076555974	8.96776391982183	-20.0075013802546	3.46640789293319e-64	2.98659186023188e-62	135.437582530792	TELO2	not-changed
LINC01210	-2.04644557566116	8.90485523385301	-20.0013218368695	3.70152174824169e-64	3.17559063686386e-62	135.372246021718	LINC01210	down-regulated
UBR4	-1.1967246371048	11.3025723830735	-19.9872530918563	4.29798507256667e-64	3.67168123084816e-62	135.223500912187	UBR4	not-changed
GPAT4	-1.2395319944323	10.0557995545657	-19.9831968221619	4.48716275369127e-64	3.81711764882573e-62	135.180616135598	GPAT4	down-regulated
COPS7A	-0.864434281169222	10.0565723830735	-19.9543307167446	6.09665962441807e-64	5.16448549108793e-62	134.875444454752	COPS7A	not-changed
IGSF8	-2.03209023662756	7.86308017817372	-19.9368101623141	7.34319666238134e-64	6.19440116779374e-62	134.690230016597	IGSF8	down-regulated
VAMP2	-1.35666655398688	9.16940979955457	-19.9306916869158	7.8360746127801e-64	6.58262917784415e-62	134.625552226681	VAMP2	down-regulated
SMARCD1	-1.19287906144362	9.66978396436526	-19.9288557575038	7.99032178443108e-64	6.68435176331598e-62	134.606145028872	SMARCD1	not-changed
TAF6	-1.11785929608271	10.2114075723831	-19.9273518803939	8.1189301830927e-64	6.76387402567487e-62	134.59024796004	TAF6	not-changed
KDM5C	-1.16637035195863	9.01679287305122	-19.9062005765503	1.01631066657644e-63	8.43203265384675e-62	134.366670934105	KDM5C	not-changed
PATL1	-1.20981185126268	10.1541603563474	-19.9049845979922	1.02951604446593e-63	8.50658728380231e-62	134.353818027388	PATL1	down-regulated
COMMD6	1.08621712069994	13.6306815144766	19.9031578491502	1.04967742524087e-63	8.63777411031884e-62	134.33450936095	COMMD6	not-changed
MDN1	-1.10643996818453	9.87207572383073	-19.8880895983043	1.23177249341961e-63	1.00950265202572e-61	134.175242610209	MDN1	not-changed
TBC1D25	-1.20571047922052	8.82795768374165	-19.8866779765488	1.25037089069505e-63	1.02059625616611e-61	134.160322580905	TBC1D25	down-regulated
TMEM184C	0.9759585404653	9.47530512249443	19.8835100945803	1.29313668411139e-63	1.05124712453104e-61	134.12684012805	TMEM184C	not-changed
TAPBP	-1.53885647245975	12.2765924276169	-19.8830333647661	1.29969782293953e-63	1.05233766298329e-61	134.121801432141	TAPBP	down-regulated
NPIPA1	-1.77721288526547	11.4657371937639	-19.8819369797538	1.31491371324809e-63	1.06039901491179e-61	134.110213448534	NPIPA1	down-regulated
TCF25	-0.956513640882887	11.6906391982183	-19.8745385402333	1.42235232096114e-63	1.14247191804373e-61	134.032018408829	TCF25	not-changed
NSD1	-1.37150174985087	8.24635189309577	-19.8630675010123	1.60654168173138e-63	1.28529709703914e-61	133.910783108116	NSD1	down-regulated
FMNL1	-1.7807980910718	9.49592204899777	-19.8609534078362	1.64300307414721e-63	1.30927213351312e-61	133.888440121743	FMNL1	down-regulated
SUPT16H	-1.02908252137602	11.3215879732739	-19.854375642259	1.76182488373507e-63	1.39843116066861e-61	133.818923357929	SUPT16H	not-changed
PYGO2	-1.31145549811094	8.96625167037862	-19.8471031411531	1.90322092724904e-63	1.50473871036345e-61	133.74206600203	PYGO2	down-regulated
LZTR1	-1.01108164645058	9.28265256124722	-19.8407940541166	2.0350434329001e-63	1.60267619729293e-61	133.675391653335	LZTR1	not-changed
TYK2	-1.11238753231259	10.6746325167038	-19.810072358363	2.81961880184554e-63	2.21191963673182e-61	133.350744536832	TYK2	not-changed
NOL6	-1.35838621992444	8.4971135857461	-19.7826647969991	3.7715358900976e-63	2.9472067860565e-61	133.061146661281	NOL6	down-regulated
CWC27	1.22134068403261	10.1098663697105	19.7774292819816	3.98702230531012e-63	3.10356589565087e-61	133.005829391705	CWC27	up-regulated
PRR12	-1.67276901968582	8.50680178173719	-19.7691108938891	4.35498984875267e-63	3.37695962848856e-61	132.917941190797	PRR12	down-regulated
ATN1	-2.09411887055081	7.75536748329621	-19.7648366734668	4.55707439151237e-63	3.52012171675405e-61	132.872782739329	ATN1	down-regulated
CHMP2B	1.00605639292107	10.8443140311804	19.7614691396346	4.72287189675986e-63	3.63426795078533e-61	132.837204172982	CHMP2B	not-changed
RNPS1	-0.913548936170205	12.4941380846325	-19.7593018113918	4.83275412050594e-63	3.70468273093233e-61	132.814306198656	RNPS1	not-changed
ANKRD54	-0.910641817458734	9.23843429844098	-19.7476297666032	5.46998616744235e-63	4.17728754249263e-61	132.690993156103	ANKRD54	not-changed
PPP4R3A	-1.13911028037381	10.2964832962138	-19.7458710633384	5.57302723165149e-63	4.23991705725757e-61	132.6724132038	PPP4R3A	not-changed
CTBS	1.26242525352953	9.89992873051225	19.7370062441646	6.1227102840592e-63	4.64060007657585e-61	132.57876188117	CTBS	up-regulated
TUBA1A	1.28840501093657	13.072723830735	19.7346489165143	6.27779293862415e-63	4.74032147698882e-61	132.553858660661	TUBA1A	up-regulated
AGRN	-1.72026001193082	8.11811581291759	-19.7232443939169	7.08534869332383e-63	5.33013861963066e-61	132.43338219322	AGRN	down-regulated
MAP2K7	-1.3696190693975	8.95029175946548	-19.720414329265	7.30133696690346e-63	5.47220277285281e-61	132.403486363128	MAP2K7	down-regulated
PRKCSH	-0.872977669516811	11.2115345211581	-19.7194291335395	7.37806068219963e-63	5.50922523754914e-61	132.393079164163	PRKCSH	not-changed
R3HDM4	-1.00624921455558	11.9398195991091	-19.6946761688109	9.59400609018732e-63	7.13744489978843e-61	132.13161106519	R3HDM4	not-changed
FXYD3	-1.22109862795785	8.85104899777283	-19.6837598370052	1.07720304169496e-62	7.98437151603386e-61	132.016308109549	FXYD3	down-regulated
YWHAH	-1.06781059852854	10.3708530066815	-19.6768124166672	1.15959721419861e-62	8.56360418881253e-61	131.942928866764	YWHAH	not-changed
TRIM21	-1.26606122489562	9.6138574610245	-19.6612188262243	1.36820216321334e-62	1.00672714644321e-60	131.778234828488	TRIM21	down-regulated
ARHGAP33	-2.30333032412009	8.09759465478842	-19.6563615058061	1.44054951906253e-62	1.0561061401389e-60	131.726935443379	ARHGAP33	down-regulated
SLC17A9	-1.82045000994233	9.0194276169265	-19.6471669810108	1.58813254426359e-62	1.16008479075718e-60	131.629832280105	SLC17A9	down-regulated
RHOT2	-0.938983853648825	9.75396436525612	-19.6467360686382	1.59540847483862e-62	1.16119242820294e-60	131.625281506051	RHOT2	not-changed
OCIAD1	0.778086140385762	12.614153674833	19.6422672396097	1.67285747241811e-62	1.21318271587847e-60	131.578087583592	OCIAD1	not-changed
ARHGDIA	-1.07454923444025	11.5998285077951	-19.6412182583724	1.69157535363616e-62	1.22236024031034e-60	131.567009731222	ARHGDIA	not-changed
ZRSR2	-1.15877009345795	10.2079131403118	-19.6357944592687	1.79174915922105e-62	1.29012338568055e-60	131.509731951402	ZRSR2	not-changed
RSRC1	1.45155834161861	9.432	19.6304370358908	1.89651728329729e-62	1.36070053197711e-60	131.453156276717	RSRC1	up-regulated
SLC34A3	-1.40355760588586	9.24569487750557	-19.6251009170423	2.00695563004512e-62	1.43483093820353e-60	131.396806720954	SLC34A3	down-regulated
NFATC2IP	-1.50279612248956	11.191013363029	-19.6232105044356	2.04760361476431e-62	1.45871860343686e-60	131.376844187257	NFATC2IP	down-regulated
ZBTB21	1.36807092861404	9.36805122494432	19.6177322612156	2.17010559795681e-62	1.54054573804251e-60	131.318995396372	ZBTB21	up-regulated
PLA2G6	-1.07098329687811	9.04372383073497	-19.6123315553193	2.29804311491244e-62	1.62564376279824e-60	131.261966561663	PLA2G6	not-changed
HSBP1	1.14156565917676	12.1579465478842	19.5895002930621	2.92765808741474e-62	2.06379422029261e-60	131.020892587429	HSBP1	not-changed
HAT1	1.0286212368264	11.9131581291759	19.5847007204153	3.08053620279395e-62	2.1639961806456e-60	130.970216891016	HAT1	not-changed
SUPT6H	-1.67274688804931	9.28403786191537	-19.5829743376868	3.13745585275182e-62	2.19632803636561e-60	130.951989323785	SUPT6H	down-regulated
MSTO1	-1.06070855040764	9.42018262806236	-19.5718695745702	3.5295736434274e-62	2.46227454066228e-60	130.83474549126	MSTO1	not-changed
PHRF1	-1.86913968979917	8.24109799554566	-19.5159491478926	6.38613749889583e-62	4.43968683155996e-60	130.244417725757	PHRF1	down-regulated
OGDH	-1.92485376814476	8.8590289532294	-19.5092146255571	6.85878469050989e-62	4.75188859606083e-60	130.173333311191	OGDH	down-regulated
RRP9	-1.84325398687613	8.57069933184855	-19.5016943367337	7.42802085633843e-62	5.12864138646024e-60	130.093957283046	RRP9	down-regulated
KCTD13	-1.23931666335256	8.662429844098	-19.4740038994219	9.96231010686648e-62	6.85495338104216e-60	129.801708399855	KCTD13	down-regulated
SLC22A25	-1.59414549612249	7.99558129175947	-19.4692576837301	1.04763548910066e-61	7.18414254957771e-60	129.751619561887	SLC22A25	down-regulated
ATP5PD	0.883500596540051	13.8282383073497	19.4688970690502	1.05164786755229e-61	7.18721107041414e-60	129.74781388249	ATP5PD	not-changed
UPF1	-0.986970471266652	10.1614677060134	-19.4681769603061	1.05970617844438e-61	7.21781630527607e-60	129.740214367288	UPF1	not-changed
RPL36AL	0.818578604096242	13.9761380846325	19.4667072117351	1.07634532250918e-61	7.30646398892508e-60	129.724703758791	RPL36AL	not-changed
PSENEN	-1.3743729369656	9.28367706013363	-19.4624131741856	1.12646966338714e-61	7.62105868575438e-60	129.679388306621	PSENEN	down-regulated
URM1	-0.886245436468499	9.89029175946548	-19.4578663240861	1.18209076680054e-61	7.97061269212902e-60	129.631405797557	URM1	not-changed
C11orf54	1.11144145953471	10.6421804008909	19.4494229933636	1.29276163432972e-61	8.68778910324049e-60	129.542306541457	C11orf54	not-changed
CNOT3	-1.38713438059257	8.99545434298441	-19.4198976809721	1.7677586331852e-61	1.1840459070979e-59	129.230762641214	CNOT3	down-regulated
FBXL5	1.01630819248359	12.0577661469933	19.4130153563954	1.90151486999378e-61	1.26941858589221e-59	129.158147782526	FBXL5	not-changed
SMARCE1	0.923434241399871	12.2130712694878	19.4029237768692	2.11614674357763e-61	1.40804074248411e-59	129.051676303103	SMARCE1	not-changed
TRANK1	-1.63816915887851	9.33702449888641	-19.4010045434925	2.15962694985675e-61	1.43224470184415e-59	129.031427916899	TRANK1	down-regulated
CAMTA2	-0.953567965798371	8.93301336302895	-19.4001678216828	2.17886132749488e-61	1.44026305651227e-59	129.022600348973	CAMTA2	not-changed
SNAPC4	-1.71148160668126	8.87170824053452	-19.3928194401313	2.35531235506705e-61	1.55181216962441e-59	128.945074989005	SNAPC4	down-regulated
IMPA1	1.06348753231257	11.7994610244989	19.3760680615782	2.81279503767714e-61	1.84719090405892e-59	128.768357593061	IMPA1	not-changed
USP7	-1.01245225690992	11.7086035634744	-19.3527447464946	3.60132317179848e-61	2.35734663852692e-59	128.522332267374	USP7	not-changed
BRAT1	-1.37851051898986	9.34392204899777	-19.3503454644021	3.69404294829616e-61	2.41021358836889e-59	128.497024988605	BRAT1	down-regulated
BMT2	1.18749602306621	9.68931848552339	19.3401696718974	4.11455251823786e-61	2.67591913936108e-59	128.389695300521	BMT2	not-changed
MYBBP1A	-0.900842771922848	9.46886636971047	-19.3215669486868	5.01085159709838e-61	3.24835302408683e-59	128.193495154546	MYBBP1A	not-changed
SPOUT1	-0.959015390733743	9.20347661469933	-19.3189700222649	5.15061531549596e-61	3.32825497999084e-59	128.166107106919	SPOUT1	not-changed
FAM193A	-1.03813044342811	10.1069777282851	-19.3029343571298	6.10422582728708e-61	3.93186252089248e-59	127.996997033872	FAM193A	not-changed
YWHAQ	0.700608053290894	13.9748307349666	19.3019094061755	6.17085945226831e-61	3.96212412156629e-59	127.986188465401	YWHAQ	not-changed
ZNF236	-1.0565303241201	9.02203786191537	-19.2979998922817	6.4317671616533e-61	4.11043264116934e-59	127.944961364237	ZNF236	not-changed
CHCHD1	1.2935356333267	12.0915478841871	19.2978407172483	6.44262047819806e-61	4.11043264116934e-59	127.94328282764	CHCHD1	up-regulated
PTK2B	-1.87767586001193	9.35256570155902	-19.2970486171939	6.49690247854855e-61	4.13198898643588e-59	127.934929972852	PTK2B	down-regulated
CACTIN	-1.33310425531915	8.4842271714922	-19.2951009859483	6.63232403188283e-61	4.20485172348395e-59	127.914391941763	CACTIN	down-regulated
SLC25A39	-1.00310713859615	10.8479554565702	-19.2903853536665	6.97200993639605e-61	4.40635399146335e-59	127.864665755783	SLC25A39	not-changed
NOC2L	-1.57022533306821	8.73721603563474	-19.2897803902373	7.01682814384053e-61	4.42082100649903e-59	127.858286517023	NOC2L	down-regulated
LIG1	-1.44005760588586	9.79829844097996	-19.2853684822538	7.35250718190768e-61	4.61787842038756e-59	127.811764235889	LIG1	down-regulated
ZBTB17	-1.04197490554782	9.44411135857461	-19.2780948218388	7.94132770216309e-61	4.97220831687298e-59	127.735067747329	ZBTB17	not-changed
FAM111B	3.13114489958242	6.76982628062361	19.2761794328566	8.10407416697673e-61	5.05839750094173e-59	127.714871536007	FAM111B	up-regulated
SLC29A1	-1.62959204613244	9.07623162583519	-19.2669151916736	8.93954418496014e-61	5.56265896027721e-59	127.617190304569	SLC29A1	down-regulated
RFK	1.20040135215748	10.7369331848552	19.2632449114276	9.29387325604547e-61	5.7653470373887e-59	127.578492441646	RFK	up-regulated
LINC00520	-1.29422563133824	9.80218708240534	-19.2615854934346	9.45864888612343e-61	5.84956503659922e-59	127.560996474119	LINC00520	down-regulated
GNG11	2.1881661562935	10.2251291759465	19.2486150514774	1.08513438839277e-60	6.69033468024059e-59	127.424248295005	GNG11	up-regulated
RNMT	-0.938613461920859	10.0849153674833	-19.2469209652021	1.10477743594922e-60	6.79067618480863e-59	127.406388074256	RNMT	not-changed
SELENOK	1.23173817856432	12.3873964365256	19.2339938269493	1.26685201347725e-60	7.7632229312203e-59	127.27010617652	SELENOK	up-regulated
TAOK2	-1.65132449791212	7.7581714922049	-19.2262594865621	1.3749720059398e-60	8.40024563992496e-59	127.188572499067	TAOK2	down-regulated
RPF2	1.32067784847883	11.2597906458797	19.2244341608977	1.40180563318759e-60	8.53830917543657e-59	127.169330779932	RPF2	up-regulated
DNAJC11	-1.00256172201232	9.52348775055679	-19.2142727465795	1.56104251395812e-60	9.4795717240692e-59	127.062217138937	DNAJC11	not-changed
LINC01231	-1.53581065818255	7.45908240534521	-19.211497598946	1.60759169415752e-60	9.7329297735465e-59	127.032964654047	LINC01231	down-regulated
CIZ1	-2.26899286140385	8.8771135857461	-19.2079188237553	1.66967467116732e-60	1.0078536241139e-58	126.995241828489	CIZ1	down-regulated
SDAD1	-1.04991016106583	10.1712271714922	-19.2053347046624	1.71598744820278e-60	1.03271710278257e-58	126.968003801708	SDAD1	not-changed
CYGB	-0.938795545834158	8.12873496659243	-19.1933130960596	1.94890044969434e-60	1.16939827280618e-58	126.841294115751	CYGB	not-changed
BOD1L1	-1.16576456551999	10.1568262806236	-19.1870113626649	2.08335757380632e-60	1.24636712301214e-58	126.774875894201	BOD1L1	not-changed
GSKIP	1.11228403261086	11.3819777282851	19.1833232690037	2.16630968853766e-60	1.29215886481088e-58	126.736005566685	GSKIP	not-changed
STK19	-0.714016345197848	9.63680846325167	-19.1819905544413	2.19709016169649e-60	1.30665294247678e-58	126.72195972136	STK19	not-changed
RASEF	2.84355150129251	9.26846993318486	19.1732218701272	2.41080502918824e-60	1.42953647627835e-58	126.629546515165	RASEF	up-regulated
SH2B1	-1.14422151521178	9.11100890868597	-19.1683390848038	2.53869209251728e-60	1.50095516942055e-58	126.578088605496	SH2B1	not-changed
PTPA	-1.09670497116723	9.46491982182628	-19.1661098643617	2.59931184186024e-60	1.53230193110363e-58	126.554596083657	PTPA	not-changed
ST3GAL3	-2.20566790614436	8.64355902004454	-19.164513948437	2.64359663525654e-60	1.55386448289817e-58	126.537777772572	ST3GAL3	down-regulated
TRAPPC8	0.918938258103006	11.9050645879733	19.1598853993007	2.77634478351869e-60	1.62714788315466e-58	126.489001307225	TRAPPC8	not-changed
MAN2C1	-1.46114448200438	9.03012472160356	-19.1433702106508	3.30668178701738e-60	1.93234815965384e-58	126.314970812483	MAN2C1	down-regulated
POLR2A	-1.50812847484589	10.183561247216	-19.1409730037953	3.39165479444754e-60	1.97627607834846e-58	126.289711234331	POLR2A	down-regulated
COX11	1.25658751242792	11.6696570155902	19.127156904149	3.9257032859912e-60	2.28086754895875e-58	126.144135925122	COX11	up-regulated
FAM160A2	-1.02955156094651	9.34339420935412	-19.1234408806891	4.08316978929404e-60	2.36553983109072e-58	126.104983305269	FAM160A2	not-changed
RAPGEF1	-1.39103181547026	10.8747371937639	-19.1174639533216	4.34979229648097e-60	2.51278402548289e-58	126.042011039986	RAPGEF1	down-regulated
SMARCD2	-0.880962517399093	10.4803118040089	-19.1061148923957	4.9048823794931e-60	2.82535239008458e-58	125.922444008214	SMARCD2	not-changed
ZFR	0.765619308013513	12.2536926503341	19.102294409911	5.10724596171027e-60	2.93353805794988e-58	125.88219526602	ZFR	not-changed
VPS26A	0.632627878305829	12.135013363029	19.0945556023204	5.54308731294258e-60	3.17483475330214e-58	125.800669513434	VPS26A	not-changed
POFUT2	-0.887469636110565	8.92989977728285	-19.0846912780206	6.15294074540487e-60	3.5141483956971e-58	125.696757030062	POFUT2	not-changed
SLC25A22	-1.09235197852456	8.67625835189309	-19.0816850749892	6.35180449568809e-60	3.61747826094824e-58	125.665090262952	SLC25A22	not-changed
EDC4	-1.31113795983297	9.22878173719376	-19.0797287651606	6.48465425246462e-60	3.68273561644899e-58	125.644483144316	EDC4	down-regulated
BMS1P1	-1.80960254523762	8.27061469933185	-19.0522326373191	8.67417383943383e-60	4.90593333000562e-58	125.354871093333	BMS1P1	down-regulated
C12orf29	1.25804609266255	9.90997772828508	19.0520912374727	8.68715936120235e-60	4.90593333000562e-58	125.353381864508	C12orf29	up-regulated
ARFGAP1	-1.04407762974747	9.51706236080178	-19.0491179014487	8.96476227744843e-60	5.04856347138653e-58	125.322066837214	ARFGAP1	not-changed
UBFD1	-0.945954086299469	9.98137416481069	-19.0292899990968	1.10568765300559e-59	6.20940634324391e-58	125.113253412987	UBFD1	not-changed
HEXD	-1.24627436866175	9.11597327394209	-19.0249496413499	1.15763513672091e-59	6.48307833095288e-58	125.067546884185	HEXD	down-regulated
NCSTN	-0.88307100815271	10.025153674833	-19.0230255785119	1.18143690540309e-59	6.59804693901155e-58	125.047285718422	NCSTN	not-changed
UBE2D4	-0.748938834758389	10.0740489977728	-19.0160790540785	1.27151348218887e-59	7.0814871034281e-58	124.974137786757	UBE2D4	not-changed
DHX37	-1.19011264664944	8.82581737193764	-19.0135770178801	1.30561263372379e-59	7.2513653742439e-58	124.94779166736	DHX37	not-changed
DVL3	-1.58373809902565	9.70278841870824	-19.00962154242	1.36139429923828e-59	7.54040397443487e-58	124.90614176952	DVL3	down-regulated
KLF16	-2.38085722807716	7.10922717149221	-19.0058902677667	1.41619572007006e-59	7.82244435954313e-58	124.866853478613	KLF16	down-regulated
ATP5MD	1.00803901372042	14.283986636971	19.0042071863939	1.44163155388012e-59	7.94118408682437e-58	124.84913181652	ATP5MD	not-changed
TMEM230	0.742330284350771	13.2939331848552	19.0031071520657	1.45850222667324e-59	8.01222435748207e-58	124.83754931971	TMEM230	not-changed
ARFIP2	-0.844244283157691	10.283131403118	-19.0001217210398	1.50528939612411e-59	8.24677704218973e-58	124.806115437884	ARFIP2	not-changed
ATXN2L	-1.95362306621595	7.44604899777283	-18.9978758346718	1.54147266322048e-59	8.42212204964449e-58	124.782468638152	ATXN2L	down-regulated
DOLPP1	-0.910083078146751	9.52563251670379	-18.9938517239535	1.60849267622326e-59	8.76454617441542e-58	124.740099770628	DOLPP1	not-changed
FANCA	-1.43929399482998	9.65977728285078	-18.9793829692296	1.87444430425418e-59	1.01861648566223e-57	124.5877697808	FANCA	down-regulated
COPS5	0.97714038576259	12.0931024498886	18.9770151917223	1.92197166883297e-59	1.04163631224036e-57	124.562842527532	COPS5	not-changed
TMX1	1.0593916882084	12.7829131403118	18.9713435276778	2.04077218379171e-59	1.10305651467627e-57	124.50313431111	TMX1	not-changed
ASXL1	-0.911869974149932	10.0986191536748	-18.9665105471179	2.14777953797513e-59	1.15779099639349e-57	124.452256825882	ASXL1	not-changed
RNF139	0.799096699144956	10.6967037861915	18.9536652295789	2.46024365679683e-59	1.32269259639149e-57	124.317039157109	RNF139	not-changed
CC2D1A	-0.977790932590972	8.54643429844098	-18.9388113617019	2.87862362386922e-59	1.543508800022e-57	124.160690735072	CC2D1A	not-changed
POLRMT	-1.21921928812886	9.63495322939866	-18.9381542149382	2.89869334112187e-59	1.55014738595114e-57	124.153774068891	POLRMT	down-regulated
SLC25A11	-0.964809604295088	10.230859688196	-18.9364985471244	2.94988081360731e-59	1.5733478064322e-57	124.136347787136	SLC25A11	not-changed
STK36	-1.30472384171803	8.62263028953229	-18.9347549073596	3.00476506695556e-59	1.59839230910003e-57	124.117995761808	STK36	down-regulated
PSMG2	0.818145794392519	13.300140311804	18.9237158677048	3.37672150742092e-59	1.7915284818714e-57	124.001812823886	PSMG2	not-changed
DDX42	-0.941976854245382	11.0234187082405	-18.9141005666614	3.73800935683905e-59	1.97800542370688e-57	123.900620467515	DDX42	not-changed
VHL	-1.98464643070192	7.67626280623608	-18.9136892800911	3.75429678496636e-59	1.98142349428552e-57	123.89629217536	VHL	down-regulated
C9orf85	1.32083929210579	9.66460801781737	18.9134139716215	3.76523893295398e-59	1.98200997721371e-57	123.893394893589	C9orf85	up-regulated
SURF1	0.91289586398886	11.7801336302895	18.8677427307128	6.1015591296208e-59	3.20347743781992e-57	123.412826938083	SURF1	not-changed
UAP1L1	-1.21369395506065	8.91117817371938	-18.8636550197489	6.37092104416101e-59	3.33621140704754e-57	123.36982108756	UAP1L1	down-regulated
ARRB2	-1.86585213760191	8.83769042316258	-18.8517426466972	7.22560034290273e-59	3.77397224127622e-57	123.244499859606	ARRB2	down-regulated
DHX38	-1.76571881089679	8.56620267260579	-18.8454268653398	7.72429009323915e-59	4.02401582867686e-57	123.178059890588	DHX38	down-regulated
SETDB1	-1.17431455557765	9.86767037861915	-18.8406251633958	8.12632163887878e-59	4.22254563302668e-57	123.127549256092	SETDB1	not-changed
RNF26	-1.1231543845695	9.4335434298441	-18.8246521925158	9.62034833366205e-59	4.98601138187559e-57	122.959535162782	RNF26	not-changed
BAG4	0.985820680055671	10.7328864142539	18.8161446360673	1.05251282605192e-58	5.44095156052121e-57	122.870053890328	BAG4	not-changed
ASMTL-AS1	-1.98484505865977	7.60281069042316	-18.8149610041564	1.06575722943626e-58	5.49532775004204e-57	122.857604990409	ASMTL-AS1	down-regulated
ZNF148	1.28533020481208	10.0137817371938	18.8120101939043	1.09950548411251e-58	5.65488011867152e-57	122.826570112924	ZNF148	up-regulated
CABIN1	-1.07982406044939	9.7857995545657	-18.8108528639637	1.11303155025313e-58	5.70988017421205e-57	122.81439815585	CABIN1	not-changed
TCHP	-1.00359956253728	10.1905122494432	-18.8084231474455	1.14197187506178e-58	5.8434758815027e-57	122.788844443756	TCHP	not-changed
NOP9	-0.973251242791816	9.09424053452116	-18.7924270901938	1.35220885950947e-58	6.90174248520772e-57	122.620621031833	NOP9	not-changed
ATF1	1.02837933982899	10.72314922049	18.7915608579471	1.36463894606944e-58	6.94759742214797e-57	122.611511732586	ATF1	not-changed
TRIM11	-0.87856440644264	9.24241648106904	-18.7886423244184	1.40736538169082e-58	7.14628435938397e-57	122.580820794707	TRIM11	not-changed
SMIM10L1	0.903515788427123	11.2638374164811	18.7882100946252	1.41380575983036e-58	7.14628435938397e-57	122.576275567366	SMIM10L1	not-changed
SUPT5H	-0.731226605687009	10.4178440979955	-18.7881770982678	1.41429862575974e-58	7.14628435938397e-57	122.5759285859	SUPT5H	not-changed
GON7	1.3168993636906	10.4996280623608	18.7872017737275	1.42894483986181e-58	7.20223922911348e-57	122.565672348721	GON7	up-regulated
GATD1	-1.14207659574468	9.32874610244989	-18.768961011181	1.73257008479923e-58	8.71080934654298e-57	122.373869246506	GATD1	not-changed
SLC12A9	-0.965342692384167	8.84607795100223	-18.759290742361	1.91887694026411e-58	9.62350198822507e-57	122.27219455851	SLC12A9	not-changed
TXNDC9	1.0156159276198	12.1213340757238	18.7475446664939	2.17230747328113e-58	1.08674667416429e-56	122.148702936849	TXNDC9	not-changed
DLGAP4	-1.32700180950488	9.62484632516704	-18.7265123663738	2.71254787195493e-58	1.35365538728919e-56	121.9276044215	DLGAP4	down-regulated
FUS	-0.973252913104002	11.8902227171492	-18.7243072841171	2.77644697085976e-58	1.38212215751861e-56	121.904425602112	FUS	not-changed
SELENOF	1.11917906144363	12.645289532294	18.7232291504706	2.80823462877657e-58	1.39450291504346e-56	121.893092873188	SELENOF	not-changed
NLGN2	-1.18006078743289	8.36508908685969	-18.7088910017984	3.26723775738559e-58	1.61844669352951e-56	121.742385935666	NLGN2	not-changed
TRAF7	-1.10361173195466	9.33600668151448	-18.7075749511368	3.31295217343529e-58	1.63706933256443e-56	121.728553755347	TRAF7	not-changed
PROSER3	-1.08338975939551	8.32076391982183	-18.7012499730009	3.54173521060762e-58	1.74584165234866e-56	121.662077549903	PROSER3	not-changed
NFKB2	-1.73856607675482	8.45851002227172	-18.6986126604841	3.64173376778929e-58	1.79075596322927e-56	121.634359922555	NFKB2	down-regulated
ATP6V1G1	1.02527377212169	12.8645456570156	18.6973612120677	3.69016703347972e-58	1.81015711829646e-56	121.621207617515	ATP6V1G1	not-changed
SLFN5	1.88442519387553	9.78566815144766	18.6879107963792	4.07731473106232e-58	1.99521219157639e-56	121.521890395313	SLFN5	up-regulated
TSEN15	1.24415824219527	10.5933585746102	18.680216761298	4.42229640117216e-58	2.15878735457704e-56	121.441036065231	TSEN15	up-regulated
LSM3	1.14895862000398	12.2577126948775	18.6789832795413	4.48025393620173e-58	2.18179709197495e-56	121.428074154098	LSM3	not-changed
NEK7	1.30640670113342	11.8135590200445	18.6756906591678	4.63870890918684e-58	2.2529612817997e-56	121.393474523519	NEK7	up-regulated
FAM53B	-1.06486371047922	10.2837639198218	-18.6754860758067	4.64873713222893e-58	2.2529612817997e-56	121.391324738276	FAM53B	not-changed
PIM1	-1.77870542851463	10.7793875278396	-18.6562172967222	5.69722006678476e-58	2.75447610950714e-56	121.188859326642	PIM1	down-regulated
HNRNPUL1	-1.01481177172399	11.8770534521158	-18.655125477095	5.7632513172871e-58	2.77973468439773e-56	121.177387884041	HNRNPUL1	not-changed
SLC9A8	-1.38372451779678	8.67787527839644	-18.6546913158632	5.78972063645993e-58	2.78583670051715e-56	121.17282629705	SLC9A8	down-regulated
NEURL4	-1.54484171803539	7.89655679287305	-18.6361814209293	7.0387494544098e-58	3.37876732738943e-56	120.978361388341	NEURL4	down-regulated
HDAC10	-1.86604112149533	7.64281737193764	-18.6346208909333	7.15562437887843e-58	3.42671123759069e-56	120.961967572874	HDAC10	down-regulated
ERAL1	-0.787093497713263	9.82738307349666	-18.6317683852894	7.37429649294715e-58	3.52306141218738e-56	120.93200162963	ERAL1	not-changed
NFU1	0.999382640684018	11.0808864142539	18.6295606928154	7.54811137983886e-58	3.59757620635771e-56	120.908809929973	NFU1	not-changed
GRIPAP1	-1.71533133823822	8.51969042316258	-18.620988990715	8.2626702137196e-58	3.92886071176417e-56	120.818767918433	GRIPAP1	down-regulated
NUP54	0.886338138794983	11.3536971046771	18.6204304393109	8.31151231139336e-58	3.94278587552945e-56	120.812900760332	NUP54	not-changed
VIPAS39	-0.685083436070785	9.86158129175947	-18.6142659536969	8.87010910238063e-58	4.19789365288957e-56	120.748149005945	VIPAS39	not-changed
TROAP	-1.58009123086101	9.37359465478842	-18.5981113600364	1.05184620204024e-57	4.966339878064e-56	120.578474109038	TROAP	down-regulated
B3GAT3	-1.25354547623782	8.65455456570156	-18.5933377292371	1.10617628314467e-57	5.21065888889714e-56	120.52833932208	B3GAT3	down-regulated
BRMS1	-0.697123086100605	10.3596770601336	-18.5750310417856	1.34182667788481e-57	6.30595982583584e-56	120.336089704417	BRMS1	not-changed
PPP6R3	0.875174985086508	11.5151425389755	18.5699383512671	1.41588089257815e-57	6.63850573843446e-56	120.2826126177	PPP6R3	not-changed
BAZ1B	-1.01286470471267	10.3686325167038	-18.5659363549522	1.47692972962631e-57	6.90867291856058e-56	120.240589973567	BAZ1B	not-changed
SMG7	-1.14004539669915	10.3426035634744	-18.5599459663404	1.57326112807803e-57	7.34224944518083e-56	120.177690569593	SMG7	not-changed
PWP2	-1.04629560548817	9.57378396436526	-18.5589870171661	1.58925466541379e-57	7.39976057953984e-56	120.16762179629	PWP2	not-changed
BAZ2A	-1.0272903360509	9.15499109131403	-18.5512217296711	1.72489663527457e-57	8.01282052160611e-56	120.086090335099	BAZ2A	not-changed
TWSG1	1.46540298270034	10.7227772828508	18.5384632499463	1.97333248684893e-57	9.14582902697962e-56	119.95214263747	TWSG1	up-regulated
IL11RA	-1.40548995824219	8.00746325167038	-18.5352067582637	2.04227878166355e-57	9.4436657149355e-56	119.917955578813	IL11RA	down-regulated
ARHGAP4	-1.30347629747464	9.55679510022272	-18.5347869183134	2.05134105142071e-57	9.46386428780158e-56	119.913548103653	ARHGAP4	down-regulated
ZNF585B	-1.07363664744481	8.37070601336303	-18.5231644404716	2.31881448363434e-57	1.0673428950811e-55	119.791540673521	ZNF585B	not-changed
KATNIP	-0.957556015112347	9.11232962138085	-18.521404604304	2.36224670072212e-57	1.08485776157764e-55	119.773067601476	KATNIP	not-changed
ZBTB40	-0.971288029429315	9.48832516703786	-18.5181706333855	2.44419079110165e-57	1.11993933044092e-55	119.739121081188	ZBTB40	not-changed
ATXN7L3	-1.17126752833565	9.18369710467706	-18.5139743245541	2.55476787713369e-57	1.16795181793407e-55	119.695074208866	ATXN7L3	not-changed
TXLNA	-1.24655233644859	9.44367483296214	-18.5089950775285	2.69247946036789e-57	1.22812394571215e-55	119.642810882017	TXLNA	down-regulated
POLR2K	1.28098814873731	11.8395122494432	18.4980819973372	3.02080535860652e-57	1.37477329198343e-55	119.528271202851	POLR2K	up-regulated
GTF2IP20	-2.58819777291709	7.42731625835189	-18.492122134272	3.21670306807013e-57	1.46062951701266e-55	119.465722469615	GTF2IP20	down-regulated
HLA-J	-1.53481684231457	12.4804454342984	-18.4910623945026	3.25284259596963e-57	1.47372043994031e-55	119.454600787807	HLA-J	down-regulated
COPS2	0.848829469079332	12.2639220489978	18.4899471656434	3.29131268730009e-57	1.48780616790711e-55	119.442896855031	COPS2	not-changed
ARID1A	-1.20723048319747	11.5585055679287	-18.4789931223635	3.69419891567685e-57	1.66619114852261e-55	119.32794306593	ARID1A	down-regulated
ELAVL1	-0.97383103996817	12.2746748329621	-18.4763678416665	3.79786107317228e-57	1.70802531250433e-55	119.300394234568	ELAVL1	not-changed
CWF19L1	-1.59682300656195	8.78002004454343	-18.4762172318783	3.80389546805438e-57	1.70802531250433e-55	119.298813800987	CWF19L1	down-regulated
EPN1	-2.08875867965799	7.83444988864143	-18.4706037769465	4.0357731584139e-57	1.80811605881739e-55	119.239909883956	EPN1	down-regulated
PACS2	-0.941573016504275	10.5382026726058	-18.4510127611033	4.96141466773749e-57	2.21789536843139e-55	119.03435354192	PACS2	not-changed
ORC4	0.93032256909923	10.5820734966592	18.4494027279763	5.04632205999904e-57	2.25086059848762e-55	119.01746178026	ORC4	not-changed
MTIF3	0.880761920859015	10.4716436525612	18.4319411001367	6.06589291266466e-57	2.6996571084378e-55	118.834274933241	MTIF3	not-changed
ETFRF1	1.19739771326307	10.1808930957684	18.4301057233496	6.18435553403815e-57	2.74631700268157e-55	118.815021695968	ETFRF1	not-changed
TMED9	-0.950596838337646	11.047420935412	-18.4201966996948	6.865018848709e-57	3.0418823078862e-55	118.71107984999	TMED9	not-changed
MOGS	-0.899830960429513	9.12589755011136	-18.4163931728033	7.14573947823628e-57	3.15932573729653e-55	118.671184355399	MOGS	not-changed
L3MBTL2	-0.806320441439651	10.2345256124722	-18.4039137818816	8.14987810397134e-57	3.59539808433624e-55	118.540295011515	L3MBTL2	not-changed
DCAF17	-1.35603203420163	8.67779732739421	-18.4035822292526	8.17839683399994e-57	3.60010171550814e-55	118.53681770874	DCAF17	down-regulated
SNX1	-0.798345496122483	10.8300712694877	-18.3800588843012	1.04783549230971e-56	4.60248613517563e-55	118.290128564147	SNX1	not-changed
EIF1	0.684177013322723	15.286416481069	18.3786441656436	1.06356780100252e-56	4.66143270348083e-55	118.27529382047	EIF1	not-changed
CBLN3	-1.47455150129249	8.91801559020045	-18.3771033630195	1.0809708678682e-56	4.72743029654898e-55	118.259137141431	CBLN3	down-regulated
INAFM1	-1.07751578842713	9.48023162583519	-18.3590205943188	1.30777286440252e-56	5.70692829420329e-55	118.069537491299	INAFM1	not-changed
RP9	1.20445683038378	9.76171714922049	18.3456776903164	1.50508583420926e-56	6.55378736576519e-55	117.929652637134	RP9	up-regulated
ZDHHC8	-1.60612016305429	8.88346547884187	-18.340830631099	1.58390689310117e-56	6.8821437223734e-55	117.878840408589	ZDHHC8	down-regulated
HM13	-0.825654006760795	9.72586414253898	-18.3397684665527	1.60172305728838e-56	6.94458893720236e-55	117.867705880636	HM13	not-changed
BECN1	-0.719959673891433	11.1521247216036	-18.334839224683	1.68706050507633e-56	7.2988898804386e-55	117.816034498846	BECN1	not-changed
MAP4K1	-1.4320316762776	11.609864142539	-18.3282721993564	1.80785152784291e-56	7.80473118904515e-55	117.747197917121	MAP4K1	down-regulated
CYB5D1	-1.0732226486379	8.37726503340757	-18.3261086727722	1.84950963995263e-56	7.96751364339424e-55	117.724520263214	CYB5D1	not-changed
SPG21	-0.761157307615832	11.6000467706013	-18.3161777877277	2.05337647674959e-56	8.82689192915746e-55	117.620431607752	SPG21	not-changed
FBXL17	1.22661366076754	9.83773273942094	18.2939350026367	2.59518244134987e-56	1.11322283404372e-54	117.387327483257	FBXL17	up-regulated
FLNA	-1.8034935374826	10.6838752783964	-18.2931439660298	2.61688344936095e-56	1.12014834867444e-54	117.37903817936	FLNA	down-regulated
SHKBP1	-1.57478293895406	9.46269487750557	-18.28534254886	2.84086083701386e-56	1.21344481642026e-54	117.297289592813	SHKBP1	down-regulated
TMED10	0.70687675482205	13.1169376391982	18.2813249079429	2.96357882951663e-56	1.26318631674175e-54	117.255191970062	TMED10	not-changed
SLC25A25-AS1	-1.49359119109166	8.81529844097996	-18.2803805004037	2.9931861767343e-56	1.27311448331519e-54	117.245296478743	SLC25A25-AS1	down-regulated
CAP1	0.69020731755815	13.7734565701559	18.2785494957546	3.05143315865949e-56	1.29515671393124e-54	117.226111444256	CAP1	not-changed
COA6	1.10322503479816	11.0196302895323	18.2706415226248	3.31628968286154e-56	1.40461588857503e-54	117.14325590935	COA6	not-changed
TMEM106B	1.14032889242393	11.3289443207127	18.2679520173878	3.41150573401631e-56	1.44191545290362e-54	117.115077892472	TMEM106B	not-changed
CDK9	-1.14997832571088	8.36964810690423	-18.2581479716831	3.78231681662008e-56	1.5952989401648e-54	117.012365768557	CDK9	not-changed
CLUH	-1.09543324716644	9.89886636971047	-18.2566105865781	3.84401069140301e-56	1.61793527242956e-54	116.996260077624	CLUH	not-changed
HAUS3	0.812071127460735	10.1604365256125	18.2508858321893	4.08271505049916e-56	1.7148253777732e-54	116.936289129966	HAUS3	not-changed
SEPTIN7P13	-2.45273133823822	7.54663474387528	-18.2483155270965	4.19465297731704e-56	1.75817876664634e-54	116.909364219175	SEPTIN7P13	down-regulated
CCDC88B	-1.42658862596938	9.78797327394209	-18.2456973299931	4.31183009463268e-56	1.80354370410559e-54	116.881938193517	CCDC88B	down-regulated
IFFO1	-1.11799471067808	10.2955345211581	-18.2423538580403	4.46623437116036e-56	1.86425985832224e-54	116.846915640134	IFFO1	not-changed
LMO7	2.8185549612249	7.39502004454343	18.2377148345556	4.68966109729544e-56	1.95347639220193e-54	116.798323869803	LMO7	up-regulated
ANKRD40	-0.79537271823424	9.9542583518931	-18.2354899442451	4.80074618421965e-56	1.99562564577428e-54	116.775019748881	ANKRD40	not-changed
FBXO44	-2.1432497116723	6.94195100222717	-18.2326207662902	4.94788990023448e-56	2.05255984112402e-54	116.744967798351	FBXO44	down-regulated
CRIPT	1.20073676675283	10.82070155902	18.2160521551212	5.89016889589641e-56	2.4338747902963e-54	116.571440794719	CRIPT	up-regulated
GBA2	-1.22747981706104	8.55883741648107	-18.2160350319038	5.89123008612962e-56	2.4338747902963e-54	116.571261471281	GBA2	down-regulated
KMT2B	-1.19892000397694	9.40024944320713	-18.2145488071451	5.98406868680909e-56	2.46717400398278e-54	116.555697030721	KMT2B	not-changed
TNK1	-0.979693895406635	8.52242093541203	-18.2126195860985	6.10676336640678e-56	2.51262155571688e-54	116.535493607223	TNK1	not-changed
HNRNPDL	-1.2438079339829	12.5309020044543	-18.2069661807245	6.48097661698531e-56	2.66116027647741e-54	116.476291159697	HNRNPDL	down-regulated
CAPN15	-1.33479471067808	8.60700445434298	-18.203755773641	6.70359376670111e-56	2.74697467338336e-54	116.442673002626	CAPN15	down-regulated
RHBDD3	-1.00344225492146	8.34676169265033	-18.1890969241988	7.82121196730414e-56	3.19844735238983e-54	116.289182378521	RHBDD3	not-changed
EDNRB	1.6547914893617	8.74790645879733	18.1885513372352	7.86622421021494e-56	3.21034304255351e-54	116.283469976031	EDNRB	up-regulated
SMNDC1	0.811810200835154	12.0403674832962	18.1872338035328	7.97599414150228e-56	3.2485660179157e-54	116.269675245744	SMNDC1	not-changed
CCDC59	0.909447007357333	11.0793919821826	18.1810693403773	8.5102691201985e-56	3.45918418815165e-54	116.205134595788	CCDC59	not-changed
MPHOSPH10	0.985092901173195	10.3418374164811	18.1804995688431	8.56142123110726e-56	3.472974113488e-54	116.199169372	MPHOSPH10	not-changed
EIF2AK1	-0.884003718433089	12.0351091314031	-18.1789231296628	8.70455503500341e-56	3.5239464670824e-54	116.182664986519	EIF2AK1	not-changed
CSNK1A1	0.669050069596336	12.4519131403118	18.1584054017896	1.08008288154381e-55	4.36383787070236e-54	115.967876202162	CSNK1A1	not-changed
HSPB11	1.18400906740903	12.8219799554566	18.1455780468707	1.23604817036163e-55	4.98399343253218e-54	115.83361235655	HSPB11	not-changed
PPP1R12C	-1.20019926426726	9.08598440979955	-18.1405295718834	1.30343214142422e-55	5.24520866332408e-54	115.780773957721	PPP1R12C	down-regulated
PPP2R1B	-0.97972692384173	10.0035924276169	-18.1361656853722	1.36462907889153e-55	5.48053523098248e-54	115.735102412414	PPP2R1B	not-changed
SCAMP4	-1.76390552793796	8.25844988864143	-18.1333079380692	1.4062520144762e-55	5.6364705494741e-54	115.705194721898	SCAMP4	down-regulated
UBE2V2	1.05567727182343	11.6435768374165	18.1325660528286	1.41726339789519e-55	5.66933479463588e-54	115.69743065629	UBE2V2	not-changed
TVP23C	-1.70297190296282	7.84405345211581	-18.1296322482343	1.46165872426709e-55	5.83534683959383e-54	115.66672793178	TVP23C	down-regulated
DEGS1	1.09782288725391	11.896719376392	18.1229208042845	1.56851411991832e-55	6.24956782048878e-54	115.596494481611	DEGS1	not-changed
STK25	-0.891576894014722	9.33056347438753	-18.1216604084699	1.58943522300951e-55	6.32043462151771e-54	115.583305224308	STK25	not-changed
ZNF687	-2.02526784649036	7.25285523385301	-18.1207201119712	1.60522444490184e-55	6.37065551843818e-54	115.573465698731	ZNF687	down-regulated
DRAP1	-0.977214575462314	10.0177728285078	-18.1201758768163	1.61443461085352e-55	6.39462007650645e-54	115.567770705665	DRAP1	not-changed
GLYR1	-0.897514018691576	10.6972316258352	-18.1187071752773	1.63955402345322e-55	6.48138209153734e-54	115.552402029765	GLYR1	not-changed
GOLGA1	-1.14644776297475	8.52359465478842	-18.1070604914869	1.85308389946772e-55	7.31115939279231e-54	115.430536467658	GOLGA1	not-changed
PPCS	0.963082203221326	10.6751425389755	18.0898894035875	2.21960115656744e-55	8.7401130698352e-54	115.250888151373	PPCS	not-changed
SLC1A5	-1.16815842115729	9.11971937639198	-18.0885067557174	2.25208999850628e-55	8.85075759451951e-54	115.236423684694	SLC1A5	not-changed
H1-5	3.12141403857626	5.93155011135857	18.0845021553177	2.3488942548606e-55	9.21324067553395e-54	115.19453082821	H1-5	up-regulated
CDH22	-1.13957510439451	8.62981069042316	-18.0751057573686	2.59267395173778e-55	1.01496892312593e-53	115.096239061237	CDH22	not-changed
LOC100507156	-1.61308719427322	7.08224276169265	-18.0674895463897	2.80869900597917e-55	1.09740660192918e-53	115.016574930786	LOC100507156	down-regulated
RNF40	-1.48358584211573	9.46616926503341	-18.0668219739934	2.82847030013501e-55	1.10299399847238e-53	115.009592499649	RNF40	down-regulated
SLC35F5	1.17023654802147	10.1515434298441	18.0626764081473	2.95439969584384e-55	1.14987741876815e-53	114.96623312095	SLC35F5	not-changed
NCAPD3	-0.950058540465287	10.1526391982183	-18.0624928585741	2.96010307197397e-55	1.14987741876815e-53	114.964313371909	NCAPD3	not-changed
CETN3	1.1620609663949	11.6684766146993	18.0606757429688	3.01716267657331e-55	1.16978878312297e-53	114.945308284653	CETN3	not-changed
PFDN4	1.2372183535494	11.775425389755	18.0577323615531	3.11192944956289e-55	1.20421515609669e-53	114.914524297075	PFDN4	up-regulated
SARS2	-1.05504181745874	8.94201113585746	-18.0484220063491	3.43171986392191e-55	1.32541962024003e-53	114.81715513593	SARS2	not-changed
D2HGDH	-2.25421435673096	8.22275723830735	-18.0413473236617	3.69649847321664e-55	1.4249542202394e-53	114.743172277968	D2HGDH	down-regulated
RPAP1	-0.976665559753426	8.93743875278397	-18.0381567310066	3.82249721056377e-55	1.47071309660642e-53	114.709808440098	RPAP1	not-changed
ZNF740	-1.30040069596341	8.21026948775056	-18.0243811461351	4.41765524207716e-55	1.69646375877177e-53	114.565768689713	ZNF740	down-regulated
PIK3CD	-1.37620316166236	12.1013919821826	-18.0198325216982	4.63384115384324e-55	1.77610021868125e-53	114.518211369178	PIK3CD	down-regulated
POU2F2	-1.67097794790217	11.003859688196	-18.0173901887352	4.75424896984021e-55	1.81879342468593e-53	114.492676786016	POU2F2	down-regulated
SAMD4B	-1.27354674885663	9.0007706013363	-18.016897729953	4.77890347566924e-55	1.82476274570014e-53	114.487528197788	SAMD4B	down-regulated
CWC22	0.716789361702119	10.2173429844098	18.0139018664988	4.93166540282835e-55	1.87953319823105e-53	114.456207344036	CWC22	not-changed
CCAR2	-1.48973724398488	8.77583741648107	-18.0077325587356	5.26178611172972e-55	2.00156358110534e-53	114.391711698053	CCAR2	down-regulated
SPCS3	0.781589341817467	12.6841893095768	18.0022634975287	5.57285229600137e-55	2.1158997201447e-53	114.334539573366	SPCS3	not-changed
ARMC8	-0.719054344800172	9.73302004454343	-17.9992708756191	5.75077468314863e-55	2.17934902983007e-53	114.303256668567	ARMC8	not-changed
KCTD6	1.36014181745874	10.3398040089087	17.994209024573	6.06473386134528e-55	2.2940168738946e-53	114.250345297607	KCTD6	up-regulated
OR51I1	-2.15266400874926	5.77552783964365	-17.993778049239	6.09224322108815e-55	2.30010703334004e-53	114.24584043615	OR51I1	down-regulated
ZDHHC7	-0.972411632531324	10.9955300668151	-17.990267844742	6.32099477112731e-55	2.38201075851771e-53	114.209149921201	ZDHHC7	not-changed
VPS39	-1.15877245973354	9.06455456570156	-17.9753070080848	7.39619596925294e-55	2.7819908010468e-53	114.052784256156	VPS39	not-changed
GATAD2B	-1.29620614436269	9.54777505567929	-17.9738618406075	7.50927568010513e-55	2.81926456213407e-53	114.037680959694	GATAD2B	down-regulated
ABCA7	-1.62144557566117	8.84241648106904	-17.9632523972947	8.39406151875246e-55	3.14558874125592e-53	113.926808774326	ABCA7	down-regulated
CRAMP1	-1.07066752833565	8.61104454342984	-17.9523213748616	9.41472719158268e-55	3.52152717828383e-53	113.812587085702	CRAMP1	not-changed
SART3	-0.697114316961624	10.6307706013363	-17.950806930751	9.56559206217581e-55	3.57133151047271e-53	113.796763074778	SART3	not-changed
LINC00342	-1.74094651024061	8.34526057906459	-17.9478480842354	9.86734946011057e-55	3.67718359455248e-53	113.765847526783	LINC00342	down-regulated
CARMIL2	-1.67048866573872	8.15065033407572	-17.9351811257195	1.12704700732704e-54	4.19232374810342e-53	113.633506039853	CARMIL2	down-regulated
IP6K2	-1.1095562338437	9.78826280623608	-17.933717398547	1.14449504066789e-54	4.24938573018514e-53	113.618214337493	IP6K2	not-changed
PLD2	-1.03493533505667	8.76867928730512	-17.9268251544213	1.23034980804653e-54	4.55975780882832e-53	113.546213130941	PLD2	not-changed
HTT	-0.91658991847285	9.30455679287305	-17.9245794068585	1.25969165282198e-54	4.65993457110897e-53	113.522753460675	HTT	not-changed
N4BP1	-0.645604971167229	10.4243207126949	-17.9183680023675	1.34453914587971e-54	4.96469848353129e-53	113.457870009489	N4BP1	not-changed
PDHB	0.906309803141777	12.7596414253898	17.9156411073166	1.38356985862883e-54	5.09947932720581e-53	113.429386418931	PDHB	not-changed
CDK2	-1.10458391330284	10.4509220489978	-17.9139538669075	1.40828457979306e-54	5.18109952795763e-53	113.411762825454	CDK2	not-changed
SEC16A	-0.872786458540466	11.1750979955457	-17.9092597186554	1.47938988966735e-54	5.43278316312995e-53	113.362732864758	SEC16A	not-changed
RPL37	0.785664147941942	15.6176080178174	17.9077996522549	1.502229517629e-54	5.50662714634878e-53	113.347483033524	RPL37	not-changed
CHTF18	-1.14654249353748	8.76329844097996	-17.9063686304602	1.52495662882505e-54	5.57979139632338e-53	113.332536761278	CHTF18	not-changed
LINC02604	-2.2185561741897	7.71741202672606	-17.9049991539671	1.54702791524297e-54	5.6502952534807e-53	113.318233482252	LINC02604	down-regulated
UBR5	-0.935198667727178	11.1574365256125	-17.9046022970566	1.55348333765718e-54	5.66361258056174e-53	113.314088607278	UBR5	not-changed
DCTN1	-1.04262491549016	10.0230824053452	-17.8880572780225	1.8479715791296e-54	6.7250821311971e-53	113.141301745418	DCTN1	not-changed
MKLN1	-0.976184151918876	9.43085968819599	-17.8866814365063	1.87483868832316e-54	6.81056266581679e-53	113.126934425533	MKLN1	not-changed
HERPUD2	0.846924000795385	11.0628819599109	17.8746190473587	2.12774351840809e-54	7.71536638032834e-53	113.000979975355	HERPUD2	not-changed
NCOA5	-1.04940612447803	9.78384187082405	-17.8569546027675	2.56086228924392e-54	9.26921806345541e-53	112.816554961273	NCOA5	not-changed
NOP2	-0.878519984092259	10.6367951002227	-17.8534793798141	2.65592242652871e-54	9.59606667405829e-53	112.78027561806	NOP2	not-changed
ANKLE2	-0.953296102604888	9.61115144766147	-17.8498938340828	2.75769682628542e-54	9.94596166632205e-53	112.742845812491	ANKLE2	not-changed
DDX54	-0.922118532511425	9.27301113585746	-17.8417313019243	3.00415606703162e-54	1.08154982977544e-52	112.65764119331	DDX54	not-changed
KIFC2	-2.02655056671307	8.22212472160356	-17.8410173825794	3.02673136914335e-54	1.08773495781282e-52	112.650189256416	KIFC2	down-regulated
ATAT1	-1.90767331477431	7.6297706013363	-17.8314027686717	3.34779918161927e-54	1.20097827937057e-52	112.549836195867	ATAT1	down-regulated
PITPNM1	-1.54585871942732	8.53032739420935	-17.8222724252238	3.6841380039508e-54	1.3183682157276e-52	112.454546216201	PITPNM1	down-regulated
RAF1	-0.643443109962215	10.8580957683742	-17.8221696752306	3.68810909017592e-54	1.3183682157276e-52	112.453473900075	RAF1	not-changed
FHAD1	-1.27459017697354	8.23583073496659	-17.8199165328826	3.77627183738443e-54	1.3474940975842e-52	112.429959993466	FHAD1	down-regulated
NDUFA6	1.05232010340029	12.4436703786192	17.8121885095453	4.09496786533138e-54	1.45863334157148e-52	112.349313795653	NDUFA6	not-changed
GOSR2	-0.653550029827001	8.90195100222717	-17.8098874135036	4.19495550883455e-54	1.49161372158048e-52	112.325301736833	GOSR2	not-changed
PPP6R2	-1.4721667926029	8.76350111358575	-17.8086717980371	4.24875755100291e-54	1.50808452439735e-52	112.312616938711	PPP6R2	down-regulated
RAB5C	-1.17301986478425	10.6978619153675	-17.8081517805245	4.27198308190787e-54	1.51366346070904e-52	112.307190664924	RAB5C	not-changed
TTC7A	-1.14431610658182	9.22238084632517	-17.8033989499674	4.49022424080399e-54	1.58820019155876e-52	112.257597127245	TTC7A	not-changed
PARP14	-2.00887049115133	9.88257683741648	-17.7933831048638	4.98728989576729e-54	1.76092384568414e-52	112.153093935007	PARP14	down-regulated
CCDC9	-0.839282919069401	8.47948329621381	-17.7732539361779	6.15869169399791e-54	2.17072348326384e-52	111.943101014454	CCDC9	not-changed
RAP2C	0.89876225889839	11.5762739420935	17.7705088454698	6.33843724661177e-54	2.2301785921281e-52	111.914466659643	RAP2C	not-changed
SUMO1	0.765550109365668	13.0103830734967	17.7662224722662	6.6296425118302e-54	2.32857530803151e-52	111.869756538756	SUMO1	not-changed
FNBP4	-1.02435689003778	11.0108062360802	-17.7657898572582	6.65976586267561e-54	2.33305989878284e-52	111.865244139946	FNBP4	not-changed
TRIP10	-1.47723732352356	8.61284187082405	-17.7657069438224	6.66555479241564e-54	2.33305989878284e-52	111.864379311996	TRIP10	down-regulated
LOC114224	-1.74789486975542	8.17780846325167	-17.7597311000186	7.09629694153914e-54	2.47952240274472e-52	111.802050158936	LOC114224	down-regulated
NHLRC4	-1.68070344004772	7.98292650334076	-17.7594836626427	7.11471994434883e-54	2.48165862972347e-52	111.79946941976	NHLRC4	down-regulated
ALDH9A1	0.797274527739116	12.2949331848552	17.7591102847623	7.14261037093612e-54	2.48708407061214e-52	111.795575149536	ALDH9A1	not-changed
FBRS	-1.32189544641083	8.80393541202673	-17.7535631848287	7.57006698944771e-54	2.6313813892113e-52	111.737721476858	FBRS	down-regulated
ERCC2	-1.00257514416384	8.48363028953229	-17.7525847030767	7.64807759014417e-54	2.65392241471423e-52	111.727516692633	ERCC2	not-changed
LCE1E	-1.78832225094452	7.62580400890869	-17.7505755284388	7.81078826071404e-54	2.70572684062295e-52	111.706562909943	LCE1E	down-regulated
LINC00957	-1.19980369854843	9.50063251670379	-17.7502640788568	7.83631840827182e-54	2.70991450135794e-52	111.703314823578	LINC00957	not-changed
PPP1R15A	-1.2493768343607	9.08354565701559	-17.749782959292	7.87592071091786e-54	2.71894584679478e-52	111.698297280048	PPP1R15A	down-regulated
WIZ	-1.30007206204018	8.79777505567929	-17.7486312128571	7.97153836760655e-54	2.74725102614215e-52	111.686285937984	WIZ	down-regulated
DNAJC9-AS1	-1.71639300059654	6.82322271714922	-17.7445656100506	8.31843134975185e-54	2.8619094614735e-52	111.643887632168	DNAJC9-AS1	down-regulated
TIPRL	1.26089667926028	10.2017661469933	17.7431946270992	8.43877712257856e-54	2.89836772688767e-52	111.62959066135	TIPRL	up-regulated
MTMR3	-0.912095665142177	9.40483073496659	-17.7331402248918	9.37616657420654e-54	3.21484514120031e-52	111.52474659658	MTMR3	not-changed
RMND5B	-0.970106860210791	9.78602004454343	-17.7264178508878	1.00602431287903e-53	3.44354094600238e-52	111.454653638964	RMND5B	not-changed
UBXN11	-1.79108454961225	8.06510022271715	-17.7251639517755	1.01932533402252e-53	3.48315560325898e-52	111.44157997818	UBXN11	down-regulated
WASHC3	0.844841041956647	11.273710467706	17.7154053853089	1.12902854444328e-53	3.85149652868376e-52	111.339838747852	WASHC3	not-changed
FOXK2	-0.971580552793794	9.43358574610245	-17.7152383682054	1.13100533299879e-53	3.85172272273457e-52	111.338097540242	FOXK2	not-changed
SGSM2	-1.02255255517996	10.2768151447661	-17.7121799894963	1.16782145024908e-53	3.9703959963696e-52	111.306213457961	SGSM2	not-changed
SUGP1	-0.978446291509245	8.40730066815145	-17.7087232111352	1.21087681469757e-53	4.10984637392554e-52	111.270177161994	SUGP1	not-changed
OR7E12P	-1.01568494730563	8.47850111358575	-17.7058814906339	1.24745654874705e-53	4.22688596290577e-52	111.24055366169	OR7E12P	not-changed
SERPINB10	-2.31511549015708	5.52154788418708	-17.7031425277368	1.28375799686783e-53	4.34259143873362e-52	111.212002150433	SERPINB10	down-regulated
CLK2	-1.10743907337443	11.0563229398664	-17.7026335355932	1.29061941665543e-53	4.35848878713402e-52	111.206696397711	CLK2	not-changed
CMBL	-1.20354122091867	11.9113830734967	-17.7003089647452	1.32242429332004e-53	4.45842745445241e-52	111.182465328341	CMBL	down-regulated
PLEKHG2	-1.05745110359912	9.08397772828508	-17.6973679782739	1.36378742785014e-53	4.5902033944719e-52	111.151809615736	PLEKHG2	not-changed
RFX1	-0.846800735732758	9.55238530066815	-17.6965194212985	1.37596035924517e-53	4.6234561337903e-52	111.142964751254	RFX1	not-changed
TBC1D15	0.682012268840712	10.4380868596882	17.6945246003125	1.40500622258807e-53	4.7131997426952e-52	111.122172192549	TBC1D15	not-changed
ASNSD1	0.715345675084507	11.3135144766147	17.6865829845776	1.52684332370132e-53	5.1134033636449e-52	111.03939869696	ASNSD1	not-changed
SETD5	-1.18855533903361	11.3733340757238	-17.6847515640802	1.55640586128944e-53	5.20376427354171e-52	111.020311188596	SETD5	not-changed
FAM200B	0.977920918671712	10.1193808463252	17.6830514106224	1.58436109567913e-53	5.2884609354283e-52	111.002592090977	FAM200B	not-changed
MPV17L	-1.40167409027638	9.30064365256125	-17.6719998901688	1.77871724152697e-53	5.92739145560748e-52	110.887419884907	MPV17L	down-regulated
ACTR6	1.03507098826806	11.0280534521158	17.6682915327228	1.84913271856916e-53	6.15187536948398e-52	110.84877651682	ACTR6	not-changed
BMS1P2	-1.28472006363094	8.71744097995546	-17.6645664781643	1.92266909765247e-53	6.38598544938574e-52	110.809960610425	BMS1P2	down-regulated
SAFB2	-0.72391628554384	10.7472048997773	-17.6599456126312	2.01796237551802e-53	6.69147030473995e-52	110.761812182771	SAFB2	not-changed
PRKCI	1.47041316365083	9.99317371937639	17.6522029939495	2.188327428691e-53	7.24447771590135e-52	110.681140806823	PRKCI	up-regulated
PIF1	-1.23057949890634	8.85777282850779	-17.649412643982	2.25318595790266e-53	7.44696427824188e-52	110.65206933187	PIF1	down-regulated
MLEC	-1.02679063432094	10.4706547884187	-17.6465896774706	2.32075706524956e-53	7.65773865670971e-52	110.622658877717	MLEC	not-changed
ZCRB1	0.849667011334244	12.0774276169265	17.6440527401064	2.38320711182886e-53	7.85095401659831e-52	110.596229075609	ZCRB1	not-changed
FANCG	-1.03410353947107	9.7883140311804	-17.6404058478215	2.4759329434798e-53	8.14311322569271e-52	110.55823696422	FANCG	not-changed
ALG14	0.966558818850672	9.43356124721604	17.6371210807584	2.5625325944815e-53	8.4142051526615e-52	110.524018561979	ALG14	not-changed
EWSR1	-0.71619568502684	12.147561247216	-17.6331933245022	2.67006543059311e-53	8.75303888555896e-52	110.483103454881	EWSR1	not-changed
PCAT4	-1.6970543249155	7.14012917594655	-17.626528968145	2.86293337625599e-53	9.35719277536079e-52	110.413685173403	PCAT4	down-regulated
PPP4R3B	0.84545730761584	11.4953318485523	17.626505330341	2.86364165586906e-53	9.35719277536079e-52	110.413438962146	PPP4R3B	not-changed
TMEM126B	1.15557043149732	12.2868129175947	17.6141350405592	3.25938706618845e-53	1.06330910423018e-51	110.284598273964	TMEM126B	not-changed
SNRPD2	1.0905197057069	14.5719109131403	17.6136727106765	3.27519285661984e-53	1.06640745638326e-51	110.279783271771	SNRPD2	not-changed
TENT4A	-0.897491171206987	10.5560467706013	-17.6135481759106	3.27946343414327e-53	1.06640745638326e-51	110.278486290152	TENT4A	not-changed
WIPF2	-0.957939570491146	10.3286191536748	-17.6097715863936	3.41164749209637e-53	1.10760426873035e-51	110.23915535508	WIPF2	not-changed
OR1I1	-1.11256484390534	7.94164587973274	-17.6078406033113	3.48127682576258e-53	1.12839263800964e-51	110.219045905466	OR1I1	not-changed
DYNLL2	-0.949034062437857	10.5144721603563	-17.6043827343442	3.60953056423394e-53	1.1680858058671e-51	110.183036315633	DYNLL2	not-changed
TOP3B	-2.31957130642275	7.06692204899777	-17.6025841812499	3.67809487242773e-53	1.18836651799704e-51	110.16430703405	TOP3B	down-regulated
ZNF746	-0.938474666931789	9.65630066815145	-17.5948551513021	3.987862066744e-53	1.28638859404201e-51	110.083824535706	ZNF746	not-changed
LRRC43	-1.19078069198648	7.03664365256125	-17.5722257416076	5.05291484397962e-53	1.62734530622161e-51	109.848221304028	LRRC43	not-changed
ANAPC10	1.04660497116723	9.91880178173719	17.5718374777903	5.07347579807876e-53	1.63136117328654e-51	109.844179429261	ANAPC10	not-changed
ZNF444	-0.990504116126466	9.49458351893096	-17.568513118976	5.25297781511623e-53	1.68638990016813e-51	109.809573110875	ZNF444	not-changed
UBE2D3	0.660443388347604	13.8653429844098	17.5613540292165	5.6613758181843e-53	1.81461045898909e-51	109.735051628323	UBE2D3	not-changed
RERE	-1.21812954861802	10.6159109131403	-17.5463999961231	6.61965133343052e-53	2.11839350052846e-51	109.579407907586	RERE	down-regulated
CYTH1	-1.21432519387553	11.0881113585746	-17.5429187311977	6.86504883088672e-53	2.19214543952456e-51	109.543177920003	CYTH1	down-regulated
TNPO1	0.978247345396701	12.897434298441	17.5428238737221	6.87186110698637e-53	2.19214543952456e-51	109.542190744255	TNPO1	not-changed
HSF1	-1.13455460330086	9.27088864142539	-17.5404293991942	7.04607729472307e-53	2.24417005274742e-51	109.517271926851	HSF1	not-changed
FLOT2	-1.05479260290316	10.7867171492205	-17.5374420491868	7.26962875381203e-53	2.31171901112941e-51	109.48618405702	FLOT2	not-changed
LOC100129129	-1.36255225690992	7.99134075723831	-17.5304526267865	7.82074012381421e-53	2.48305419899556e-51	109.41345244474	LOC100129129	down-regulated
MTDH	1.2575699343806	12.5214699331849	17.5297824401426	7.87572839446207e-53	2.49658113460298e-51	109.406478795967	MTDH	up-regulated
TBCEL	0.719179836945715	9.10193763919822	17.5216965238879	8.57041531838345e-53	2.71252972109778e-51	109.32234444384	TBCEL	not-changed
OAT	1.20894822032214	11.6646748329621	17.5174424763236	8.9601352895761e-53	2.83143083970445e-51	109.27808377576	OAT	up-regulated
ROGDI	-1.1307014714655	8.3946570155902	-17.5164088542417	9.0574702702341e-53	2.85770982970563e-51	109.267329896051	ROGDI	not-changed
VPS53	-0.80187297673494	8.18506236080178	-17.5130930893129	9.37689825345255e-53	2.95386946387276e-51	109.232833235078	VPS53	not-changed
DCK	1.23220206800557	12.158868596882	17.5070898748746	9.98412793843994e-53	3.14024966250995e-51	109.170379907245	DCK	up-regulated
ECE1	-1.38502451779678	8.9470556792873	-17.5040664622175	1.030466642755e-52	3.23601837766099e-51	109.138927911895	ECE1	down-regulated
ATF7	-1.2295078743289	8.73863251670379	-17.4947288075632	1.1360996729692e-52	3.56219370244665e-51	109.041796471211	ATF7	down-regulated
MESP2	-1.35824221515211	8.38793541202673	-17.4859111884578	1.24576097629246e-52	3.89996693214789e-51	108.950083445766	MESP2	down-regulated
RECQL	0.726861483396295	11.8424498886414	17.4820664193222	1.29682935153109e-52	4.0512127134529e-51	108.910096305286	RECQL	not-changed
SREBF2	-1.43284491946708	9.467570155902	-17.4819732815157	1.29809206531947e-52	4.0512127134529e-51	108.909127655322	SREBF2	down-regulated
TMEM214	-1.01382221117518	9.98141870824053	-17.4812786380855	1.30754850075523e-52	4.07441813349709e-51	108.90190326923	TMEM214	not-changed
CD46	0.935620779479018	11.8133518930958	17.47818505189	1.35050534746362e-52	4.20178060342809e-51	108.869730210065	CD46	not-changed
INPP5D	-1.18957973752237	11.7814543429844	-17.4771810778074	1.36474710247667e-52	4.2395479711914e-51	108.859289187629	INPP5D	not-changed
GATAD2A	-1.01907442831577	11.1123452115813	-17.4756128269752	1.38729414581037e-52	4.30295958056661e-51	108.842980086796	GATAD2A	not-changed
PSME3IP1	-0.818057864386549	10.6806547884187	-17.472415225781	1.43442613025772e-52	4.44231416468907e-51	108.809727334501	PSME3IP1	not-changed
CRBN	0.855522668522578	11.2884142538975	17.4692204946722	1.48311322124557e-52	4.58604994686072e-51	108.776505578379	CRBN	not-changed
RANBP10	-0.896665877908127	8.60375501113586	-17.4688833233291	1.48834699665935e-52	4.59518588049758e-51	108.772999427323	RANBP10	not-changed
RBIS	1.15498152714258	12.5241024498886	17.4681441368639	1.49988574592494e-52	4.62373035528939e-51	108.765312877615	RBIS	not-changed
MAN2A2	-1.33584625173991	9.44983518930958	-17.4629349435082	1.58377545242888e-52	4.874885022354e-51	108.711145987469	MAN2A2	down-regulated
ULK3	-1.04953243189501	8.8551135857461	-17.4623274270466	1.59385928953555e-52	4.89844468541557e-51	108.704829032734	ULK3	not-changed
LYRM1	1.14953537482601	11.6288173719376	17.4574003090285	1.678047334718e-52	5.14933216366051e-51	108.653598411983	LYRM1	not-changed
MED9	-1.03410157088885	8.13890645879733	-17.457205210042	1.68147085112623e-52	5.15199602272885e-51	108.651569890693	MED9	not-changed
DDX18	0.977775462318546	11.7901625835189	17.4560795046077	1.70136098272751e-52	5.20502864533676e-51	108.63986557039	DDX18	not-changed
CNTROB	-1.40821491350169	8.71530066815145	-17.4536146431796	1.74573730818257e-52	5.33269846519223e-51	108.614238116824	CNTROB	down-regulated
SZT2	-1.52783157685424	8.35819599109131	-17.4521871338123	1.77196439436985e-52	5.40462543946906e-51	108.599396449066	SZT2	down-regulated
AARS2	-0.947693080135211	8.79344320712695	-17.451255248498	1.78929754811001e-52	5.44924892257492e-51	108.589707858091	AARS2	not-changed
RCC2	-0.964645694969191	12.0162271714922	-17.4466571390615	1.87733448540545e-52	5.70873914936038e-51	108.541903844919	RCC2	not-changed
UHRF1BP1L	0.966647424935376	9.25645879732739	17.4423832461035	1.96303948495965e-52	5.96036732775172e-51	108.497472684702	UHRF1BP1L	not-changed
CRK	0.774356591767749	10.2514654788419	17.4414662139644	1.98193218974506e-52	6.00868193645866e-51	108.487939538689	CRK	not-changed
AEN	-1.88917770928616	8.84692204899777	-17.4390140050632	2.03334968476567e-52	6.15530975894304e-51	108.462447700905	AEN	down-regulated
TUBB4A	-2.17429554583416	6.74987750556793	-17.4372459881573	2.07124589190734e-52	6.26062795003656e-51	108.444068777825	TUBB4A	down-regulated
PNRC2	0.702767210180941	13.2471959910913	17.4360930294545	2.09633801055343e-52	6.3269866213724e-51	108.43208371131	PNRC2	not-changed
TRMT2B	-1.48716613640883	8.05621603563474	-17.4353952115426	2.11167206896723e-52	6.35624927156961e-51	108.424829930899	TRMT2B	down-regulated
DGKZ	-1.43179775303241	10.1193118040089	-17.4353649680631	2.11233917561214e-52	6.35624927156961e-51	108.424515552778	DGKZ	down-regulated
CENPT	-1.89649920461325	7.85063251670379	-17.4327617669048	2.17055629946913e-52	6.52169680381477e-51	108.397455912765	CENPT	down-regulated
GNG5	0.747905846092657	13.5531224944321	17.4288140338734	2.26191483783863e-52	6.7860811079858e-51	108.356421667797	GNG5	not-changed
TCOF1	-0.936866613640886	9.46997772828508	-17.4144659276054	2.62752325450394e-52	7.87124759792777e-51	108.207296982069	TCOF1	not-changed
DNM2	-1.03000606482402	9.46640311804009	-17.4100573702036	2.75129940657385e-52	8.22981414479754e-51	108.161482105317	DNM2	not-changed
ENGASE	-0.86377061045933	9.82631848552339	-17.4098432198964	2.75745813722237e-52	8.23601681548744e-51	108.159256656421	ENGASE	not-changed
APH1A	-0.759948379399475	11.2144187082405	-17.4038269987678	2.93622144303005e-52	8.75697640723801e-51	108.096738273224	APH1A	not-changed
COASY	-0.782941141379988	10.7062004454343	-17.3984344627319	3.10626952734673e-52	9.2504431227234e-51	108.040704542054	COASY	not-changed
PIBF1	0.846965599522775	9.31342093541203	17.39031523032	3.38103669651148e-52	1.00538467313227e-50	107.956344096859	PIBF1	not-changed
NELFB	-0.8042250149135	10.6441158129176	-17.3899794578062	3.39290836265026e-52	1.0074289469719e-50	107.95285551754	NELFB	not-changed
AREL1	-0.916122151521174	9.79949888641425	-17.3882050689191	3.45633906840769e-52	1.02475370526717e-50	107.934420346815	AREL1	not-changed
ABCB6	-1.67847623782063	7.63477951002227	-17.3866642672651	3.51237966220476e-52	1.03983974111175e-50	107.918412347107	ABCB6	down-regulated
INTS1	-0.823641519188699	9.76847438752784	-17.3855461684592	3.55361357698302e-52	1.05050444758878e-50	107.906796147205	INTS1	not-changed
DIPK2A	1.01146744879697	10.709986636971	17.3843669481668	3.59762560680015e-52	1.06195797743335e-50	107.894545098331	DIPK2A	not-changed
SH3GL1P2	-2.36564641081726	6.24391091314031	-17.3840760284138	3.60856708208292e-52	1.06363042312681e-50	107.891522725921	SH3GL1P2	down-regulated
IKBIP	0.951462537283753	9.80952783964365	17.3807597864347	3.73566480876958e-52	1.09948522933728e-50	107.857070900887	IKBIP	not-changed
RBM6	-1.41600783455957	10.6352204899777	-17.3804934327842	3.7460649781267e-52	1.10093900909639e-50	107.854303857405	RBM6	down-regulated
RAB24	-0.987557665539867	10.0172516703786	-17.3793821423848	3.7897699460666e-52	1.11216232725835e-50	107.842759186709	RAB24	not-changed
ARMC1	0.980194153907325	11.3419153674833	17.3755740050754	3.94343674852277e-52	1.15557599254313e-50	107.803199336329	ARMC1	not-changed
YAE1	0.89827816663353	9.39668151447662	17.3670920116927	4.30844536900916e-52	1.26070489237436e-50	107.715092404057	YAE1	not-changed
SEC62	1.3987759992046	12.4752516703786	17.3635952642947	4.46857442967121e-52	1.30566563879132e-50	107.678772288191	SEC62	up-regulated
UFD1	0.815600139192682	12.1167951002227	17.3573368835933	4.77015511896959e-52	1.39176696604263e-50	107.613771125444	UFD1	not-changed
ITPRIPL1	-0.945573354543653	8.13824498886414	-17.3473114692364	5.29620061571819e-52	1.54301590481928e-50	107.509654128966	ITPRIPL1	not-changed
ARHGEF11	-1.69959441240803	8.26951002227172	-17.3453748614933	5.4043059019408e-52	1.57223970114038e-50	107.489543223206	ARHGEF11	down-regulated
SF3B3	-1.00901372042155	11.0466636971047	-17.3425480099824	5.56607571010767e-52	1.61696905463229e-50	107.460188278752	SF3B3	not-changed
NRBP1	-1.46325038775104	8.55294654788419	-17.3418874881222	5.60456673125688e-52	1.62580819955209e-50	107.453329340541	NRBP1	down-regulated
RCE1	-1.19012809703718	8.21865256124722	-17.3301121106698	6.33715834290048e-52	1.83568174355196e-50	107.331061029143	RCE1	not-changed
TRIM26	-1.17812010340027	10.2551714922049	-17.3293953758309	6.38471848941071e-52	1.84680501384518e-50	107.323619421136	TRIM26	not-changed
RNF13	1.39109811095646	11.7117795100223	17.3269889333664	6.54702566192554e-52	1.89103989068884e-50	107.298634611608	RNF13	up-regulated
POLR2C	0.643301908928205	10.8896837416481	17.3149870517305	7.42016732274535e-52	2.14017157931143e-50	107.174035699274	POLR2C	not-changed
ARHGAP30	-1.00332998608074	11.5922449888641	-17.314448094311	7.46199674050403e-52	2.14916166121859e-50	107.168440851358	ARHGAP30	not-changed
YY1	0.728442155498108	13.3709777282851	17.3134150536943	7.54283237262518e-52	2.16934441461478e-50	107.157717085431	YY1	not-changed
COPS9	0.998861682243005	12.5324721603563	17.3064212886975	8.11358775147632e-52	2.33017154782784e-50	107.08511969323	COPS9	not-changed
SBF1	-1.35390399681845	9.97121158129176	-17.296108290408	9.03486030178541e-52	2.59106427516779e-50	106.978078278171	SBF1	down-regulated
PPP5C	-1.47586464505866	8.45467483296214	-17.2929203102394	9.34026059718168e-52	2.67484366334914e-50	106.944991931569	PPP5C	down-regulated
NASP	-1.08852075959434	11.9714120267261	-17.2892433536142	9.70533093995923e-52	2.77544932029104e-50	106.906832267233	NASP	not-changed
PIP5K1C	-1.296894173792	9.30110244988864	-17.2756222156939	1.11863545730599e-51	3.19444893126715e-50	106.765485435406	PIP5K1C	down-regulated
PRRC2A	-1.41152658580235	9.74164142538975	-17.2729831210396	1.14984057972852e-51	3.27594749509681e-50	106.73810207055	PRRC2A	down-regulated
TBC1D17	-1.82497353350567	7.73336525612472	-17.2728078088413	1.15194403784353e-51	3.27594749509681e-50	106.736283052958	TBC1D17	down-regulated
ZNF335	-1.62183891429708	8.65345879732739	-17.2727990367506	1.15204938942693e-51	3.27594749509681e-50	106.736192034931	ZNF335	down-regulated
FAM161B	-0.971208789023672	9.81797995545657	-17.2598076275097	1.31912833052486e-51	3.74576708052278e-50	106.601405101692	FAM161B	not-changed
ANAPC11	0.994187830582618	12.3008062360802	17.2557562359511	1.37602748934697e-51	3.90184109883603e-50	106.559375749018	ANAPC11	not-changed
XAGE-4	-0.915609524756412	8.56806236080178	-17.2508017406358	1.44895279236384e-51	4.10285635489428e-50	106.507980248271	XAGE-4	not-changed
LOC105374690	-1.49475742692385	7.4505723830735	-17.2479163712461	1.49318846080721e-51	4.22218408952794e-50	106.478050213388	LOC105374690	down-regulated
ATP6V1F	-0.90150964406442	11.8427527839644	-17.2375264122149	1.66395026399261e-51	4.69844555635225e-50	106.370283183892	ATP6V1F	not-changed
UNKL	-1.25159904553589	9.21050779510022	-17.236210878295	1.6869186627844e-51	4.75622854151285e-50	106.356639101265	UNKL	down-regulated
RPL31	0.754078186518198	15.8243919821826	17.2360850368652	1.68913230282387e-51	4.75622854151285e-50	106.355333945753	RPL31	not-changed
ZMIZ2	-1.14346550009943	11.6164543429844	-17.232030071988	1.76203651972683e-51	4.95371480496434e-50	106.313279195785	ZMIZ2	not-changed
MFF	0.716648677669522	11.9883184855234	17.2319132964747	1.76418195028242e-51	4.95371480496434e-50	106.312068126187	MFF	not-changed
KLC2	-1.22402706303441	8.88528730512249	-17.2308375436822	1.78406911185754e-51	5.0025893413296e-50	106.300911657378	KLC2	down-regulated
PIGK	0.887766295486182	9.71440757238307	17.2255501728791	1.88511867623464e-51	5.27859411549535e-50	106.246079189886	PIGK	not-changed
FAM98C	-0.729188049313983	8.78087527839644	-17.2182440671021	2.03422376376362e-51	5.6882087796447e-50	106.170317132011	FAM98C	not-changed
VPS18	-0.877198051302445	8.90946770601336	-17.2158232450216	2.08618247432135e-51	5.82541895634248e-50	106.145215396132	VPS18	not-changed
TPCN1	-1.70499898588189	9.73852561247216	-17.2135500536778	2.13617875942976e-51	5.95677731242923e-50	106.121645111132	TPCN1	down-regulated
RELT	-1.15169546629548	9.03261692650334	-17.2118487242758	2.17437909278012e-51	6.05492498474308e-50	106.104004767417	RELT	not-changed
CWC25	-0.736292026247776	9.266429844098	-17.2098960911189	2.21906371407962e-51	6.17083359166333e-50	106.083759202136	CWC25	not-changed
YTHDC1	-0.57227733147743	11.9447037861915	-17.2096584274855	2.22456472036689e-51	6.17761010018139e-50	106.081295056624	YTHDC1	not-changed
CAPN10	-1.77641391926824	7.86092650334076	-17.20949769543	2.22829277340056e-51	6.17945125234232e-50	106.07962855749	CAPN10	down-regulated
BET1L	-0.846753072181331	9.97560801781737	-17.2046728866829	2.34315324129973e-51	6.48905391453898e-50	106.02960554167	BET1L	not-changed
WHAMMP2	-1.3815888645854	8.63856124721604	-17.1881865512879	2.78214041511189e-51	7.69420204514003e-50	105.858698897565	WHAMMP2	down-regulated
NDUFC1	0.836076635514033	12.8788864142539	17.1869177612107	2.81914885229527e-51	7.78587123440069e-50	105.845547294573	NDUFC1	not-changed
RNF167	-1.14013543448	10.2765478841871	-17.1767066620208	3.13546177242587e-51	8.64761214690534e-50	105.739711726835	RNF167	not-changed
RASSF7	-0.671497216146355	9.86631625835189	-17.1752765640641	3.18250591423898e-51	8.76536908975028e-50	105.724890139912	RASSF7	not-changed
DPAGT1	-0.744053410220717	10.0703051224944	-17.1743287612133	3.21407242128543e-51	8.84023384522995e-50	105.71506721676	DPAGT1	not-changed
TMC6	-1.19184853847683	10.8880623608018	-17.1720886249681	3.28992869854974e-51	9.03654666096203e-50	105.691851137663	TMC6	not-changed
MAP1LC3B	0.851305329091266	11.6198084632517	17.1718887980013	3.29678156776588e-51	9.04304941329631e-50	105.689780223075	MAP1LC3B	not-changed
C1orf50	0.902734579439246	9.2544565701559	17.1702631161019	3.35306519975763e-51	9.18493851797739e-50	105.672932589501	C1orf50	not-changed
PKMYT1	-1.17613581228874	9.65686191536748	-17.1697097914593	3.37244027721957e-51	9.22547739878204e-50	105.667198325614	PKMYT1	not-changed
DMAC2L	1.15630777490555	10.2604877505568	17.1677906684736	3.44051047086187e-51	9.39893382155097e-50	105.647310192072	DMAC2L	not-changed
YTHDF3	0.734870053688605	11.7719732739421	17.1665553691584	3.48505008530842e-51	9.50772594991921e-50	105.634508858977	YTHDF3	not-changed
R3HDM2	-1.02551664346789	10.3407683741648	-17.1663525515738	3.49241766616108e-51	9.51495034695589e-50	105.632407090598	R3HDM2	not-changed
NMD3	0.913484529727585	12.3709844097996	17.1568860180957	3.85417941901917e-51	1.04863847863489e-49	105.5343125184	NMD3	not-changed
ATP5MF	-1.92098258103003	4.90118040089087	-17.1372859474567	4.72654978022563e-51	1.28425835740066e-49	105.331247316667	ATP5MF	down-regulated
C2orf49-DT	-1.62476213959038	7.95613363028953	-17.1344985078752	4.8656921714543e-51	1.32028559715599e-49	105.302372150755	C2orf49-DT	down-regulated
MTA1	-1.12695231656393	10.9693162583519	-17.1340498521558	4.88846716343127e-51	1.32468261400454e-49	105.297724604648	MTA1	not-changed
KPNA4	0.797112606880095	11.4803964365256	17.1306348158158	5.06534980920218e-51	1.3707720470245e-49	105.262349670528	KPNA4	not-changed
POP4	0.758572221117516	11.8320445434298	17.1303891747453	5.07831659057963e-51	1.37243888448627e-49	105.259805233925	POP4	not-changed
PGP	-0.940353350566708	10.0702605790646	-17.1116256552337	6.17338918304813e-51	1.66615394001919e-49	105.065468595524	PGP	not-changed
UBE2K	0.859288208391318	11.267438752784	17.1095172856608	6.31032146315111e-51	1.7008341045266e-49	105.043634671359	UBE2K	not-changed
CAPNS1	-0.998210320143167	12.3487616926503	-17.1091870966942	6.33203931037307e-51	1.7044091393382e-49	105.040215340421	CAPNS1	not-changed
COX4I1	0.643140783455966	14.5136792873051	17.1084295691484	6.3821474633351e-51	1.71560633344399e-49	105.032370680562	COX4I1	not-changed
NSD3	1.28554157884272	10.6959888641425	17.1047544526204	6.63092437967717e-51	1.7801074090369e-49	104.994313639833	NSD3	up-regulated
DCTN6	0.890828335653216	10.8453563474388	17.0912849070269	7.62841704852332e-51	2.04516643770317e-49	104.854846733335	DCTN6	not-changed
CAPZA2	1.10030861006164	12.2928062360802	17.0872621807494	7.95442265700117e-51	2.1297359254688e-49	104.813198940205	CAPZA2	not-changed
STK4	-0.798011075760581	12.1589242761693	-17.0685700265418	9.66153516879303e-51	2.5833714925469e-49	104.619703840672	STK4	not-changed
CCDC17	-2.08113235235633	6.42199109131403	-17.0646880695564	1.00595736515699e-50	2.68623926343444e-49	104.57952470044	CCDC17	down-regulated
PHYKPL	-0.898591111552991	9.92383741648107	-17.0644922296273	1.0080082645438e-50	2.68815537320998e-49	104.577497763802	PHYKPL	not-changed
KLK3	-1.27646730960429	9.25737861915368	-17.0637849196242	1.01545028691772e-50	2.70442446955722e-49	104.570177170262	KLK3	down-regulated
DERA	0.768556750845095	10.9694075723831	17.0591773994955	1.06529014626695e-50	2.83341881779524e-49	104.522491334949	DERA	not-changed
PRPF6	-0.930510021873133	10.2274031180401	-17.0550239424758	1.11230895848288e-50	2.95457983029952e-49	104.47950719808	PRPF6	not-changed
HGH1	-0.810672459733556	10.000864142539	-17.0388949476393	1.31539723696385e-50	3.48943732821423e-49	104.312609301782	HGH1	not-changed
TEPSIN	-0.931865500099425	9.05170601336303	-17.0371711197577	1.33918361098572e-50	3.54786869659436e-49	104.2947736496	TEPSIN	not-changed
SRM	-1.17867142573076	10.8728619153675	-17.0293412371408	1.4527487211256e-50	3.84368332895186e-49	104.213766315906	SRM	not-changed
HCLS1	-0.990596897991658	13.0696414253898	-17.0191450396433	1.61517359625108e-50	4.26782632686999e-49	104.10828922321	HCLS1	not-changed
INIP	0.817636707098819	10.856995545657	17.0143652269394	1.69744113474737e-50	4.47933386356567e-49	104.058847928379	INIP	not-changed
TTBK1	-1.48378697554186	6.90869042316258	-17.0117359922214	1.74446490232641e-50	4.59740613017028e-49	104.031652993975	TTBK1	down-regulated
NRBF2	1.00226219924438	10.2748886414254	17.010716894157	1.76303937021965e-50	4.6402920030024e-49	104.021112411054	NRBF2	not-changed
DMPK	-1.21724231457547	8.24894654788419	-17.0065171136464	1.84169376068444e-50	4.84098929715241e-49	103.977675301067	DMPK	down-regulated
MEAF6	-0.700154324915502	10.7648663697105	-17.0037854965291	1.89472350549304e-50	4.97389591070901e-49	103.949424217226	MEAF6	not-changed
TTC37	0.854699184728567	10.8383919821826	17.0008257065455	1.95390567339697e-50	5.1225867726081e-49	103.918814414258	TTC37	not-changed
AP1M1	-0.85483990853052	11.0201069042316	-17.0001990111473	1.96667163240933e-50	5.14935932220839e-49	103.912333350787	AP1M1	not-changed
THNSL2	-1.2772259097236	7.14795322939866	-16.9993086693286	1.98495152120115e-50	5.19048088442755e-49	103.903125837274	THNSL2	down-regulated
AKT1S1	-2.23414370650228	7.75599554565702	-16.9989523357673	1.99231498079914e-50	5.20298734817247e-49	103.899440825429	AKT1S1	down-regulated
SLC25A45	-1.21087880294292	8.83530289532294	-16.9984595508169	2.00254311770488e-50	5.22293296197259e-49	103.894344733458	SLC25A45	down-regulated
ERGIC2	1.10968287930005	11.2565167037862	16.9957326371533	2.06009781196105e-50	5.36610232389492e-49	103.866145173035	ERGIC2	not-changed
RNF213	-1.7473715251541	10.4728195991091	-16.9936275534631	2.10565558779051e-50	5.47769320070251e-49	103.8443767486	RNF213	down-regulated
USP49	-1.2447797176377	8.88258351893096	-16.9869600587307	2.2566994869219e-50	5.86305648915365e-49	103.775432808647	USP49	down-regulated
ARL8A	-1.51016959634122	8.88878841870824	-16.9862445278386	2.27353865114952e-50	5.89920369959143e-49	103.768034347332	ARL8A	down-regulated
GPR107	-0.789716484390539	8.71726057906459	-16.9826289681774	2.36056516380686e-50	6.11714065135092e-49	103.730651139018	GPR107	not-changed
PPP4C	-0.955817896202031	10.7227750556793	-16.9800739759664	2.42406269372124e-50	6.27362361593247e-49	103.704234744741	PPP4C	not-changed
UNC45A	-0.745206820441433	9.51428730512249	-16.9797402214046	2.43248228326654e-50	6.28734298883803e-49	103.700784076824	UNC45A	not-changed
CLASRP	-0.965959117120695	10.2045501113586	-16.9749037716362	2.55782090818235e-50	6.6028460089455e-49	103.650781970004	CLASRP	not-changed
ADCK1	-1.08156371047922	8.26700445434298	-16.9729092308767	2.61137023634824e-50	6.7324597615111e-49	103.630162116024	ADCK1	not-changed
NKAPD1	-0.696904633127859	9.43572160356347	-16.9706349717816	2.67379701068082e-50	6.88460045112849e-49	103.606651134786	NKAPD1	not-changed
ADD3	0.879195088486769	12.5329777282851	16.9697604752351	2.69819614356982e-50	6.93239348146666e-49	103.597610890543	ADD3	not-changed
YME1L1	0.626464963213362	12.41270155902	16.9697233955806	2.69923559493643e-50	6.93239348146666e-49	103.597227576076	YME1L1	not-changed
ALG5	0.871423463909329	11.7461247216036	16.9694367718823	2.70728400350974e-50	6.94421791281932e-49	103.594264582383	ALG5	not-changed
CCDC18-AS1	-1.79760586597733	10.6365367483296	-16.9584119283458	3.0357489932934e-50	7.77684059133269e-49	103.480302708015	CCDC18-AS1	down-regulated
GCN1	-0.781377092861407	10.8655033407572	-16.9564210573722	3.09917255075164e-50	7.92924083701826e-49	103.459725142858	GCN1	not-changed
BANF1	-0.879762557168425	12.2112071269488	-16.9550209443433	3.14456722353999e-50	8.03518628565142e-49	103.445253944321	BANF1	not-changed
FBXL6	-1.29039127063035	8.21099331848552	-16.9529739136679	3.21213428204182e-50	8.19744800762596e-49	103.424096844874	FBXL6	down-regulated
GIT1	-1.00972250944522	9.09919821826281	-16.9501862819485	3.30648442914966e-50	8.42756416891105e-49	103.395286154735	GIT1	not-changed
ILF3	-0.787758977928	11.7809510022272	-16.9473024531804	3.40700423362456e-50	8.67202994569595e-49	103.365482339003	ILF3	not-changed
POLDIP3	-0.689684788228277	10.6837839643653	-16.9471895444998	3.4110013128996e-50	8.67202994569595e-49	103.36431547204	POLDIP3	not-changed
BAK1	-0.820069079339834	9.42129621380846	-16.9468942600209	3.42147683163372e-50	8.6877071035979e-49	103.361263830705	BAK1	not-changed
ACTR2	1.05468623980911	13.4195768374165	16.9455143790935	3.47085703678627e-50	8.80200612813181e-49	103.347003493675	ACTR2	not-changed
FBXO46	-0.82396894014715	9.99550556792873	-16.9448472059003	3.49498703965644e-50	8.85206453599416e-49	103.340108703851	FBXO46	not-changed
MICU2	0.788768602107771	12.0408663697105	16.9390652377395	3.7112503546337e-50	9.38801987450063e-49	103.280358408023	MICU2	not-changed
MOSPD3	-0.861592622787827	8.63436080178174	-16.9340459033153	3.90979663395617e-50	9.87787091944742e-49	103.228492715778	MOSPD3	not-changed
ACTR1B	-0.689116384967202	10.2317995545657	-16.9327721167458	3.96184867414456e-50	9.99684995236903e-49	103.215330984329	ACTR1B	not-changed
RAB2B	-0.795881924835948	10.2956837416481	-16.9102752025838	5.00408684484132e-50	1.26109243598557e-48	102.982911623093	RAB2B	not-changed
ARFRP1	-0.986218234241399	8.64063474387528	-16.9093516419368	5.05228769340745e-50	1.27165008972269e-48	102.973371618673	ARFRP1	not-changed
OR7E156P	-1.31956901968582	7.8309420935412	-16.9052947000314	5.26957277116738e-50	1.32468649176441e-48	102.931466427326	OR7E156P	down-regulated
PFN1	-0.924504692781856	14.1691291759465	-16.8997796777216	5.57999424976556e-50	1.40097464594674e-48	102.874503912936	PFN1	not-changed
LCORL	1.053249910519	9.48292204899777	16.8945670398372	5.89016571512359e-50	1.47701033560456e-48	102.820668388841	LCORL	not-changed
SESTD1	0.96910377808709	8.86656570155902	16.8827007188622	6.66199126368193e-50	1.66847709151666e-48	102.698128120525	SESTD1	not-changed
NDUFA12	0.716819029628157	13.4938975501114	16.8824247136527	6.6810973740469e-50	1.67118615580843e-48	102.69527811724	NDUFA12	not-changed
ZNF414	-2.10723626963611	6.51120489977728	-16.8777274677104	7.0147788844564e-50	1.75247778301766e-48	102.646776394711	ZNF414	down-regulated
STAT5A	-1.06818814873732	10.1931113585746	-16.8766196012397	7.09587469846017e-50	1.7705436855898e-48	102.63533748389	STAT5A	not-changed
STX5	-1.12705356929808	8.25585523385301	-16.8655959892977	7.95561011629654e-50	1.98260884492775e-48	102.521525916227	STX5	not-changed
B4GALT2	-1.02556567906144	8.18610244988864	-16.8650598172723	7.99998303198505e-50	1.99120565318334e-48	102.515990714322	B4GALT2	not-changed
THAP1	0.843327580035796	9.15966146993319	16.8600638073601	8.42551382220605e-50	2.09453494660291e-48	102.464416015014	THAP1	not-changed
TRAPPC9	-0.84276707098827	9.77274610244989	-16.8579369956228	8.61345458706555e-50	2.13799295906334e-48	102.442461594926	TRAPPC9	not-changed
KCNIP2	-1.72700515012925	8.29516481069042	-16.8578465633217	8.62153799771092e-50	2.13799295906334e-48	102.441528103959	KCNIP2	down-regulated
VPS35	0.754227480612455	12.3356035634744	16.8555107662253	8.83297191752043e-50	2.18773399052985e-48	102.417417135015	VPS35	not-changed
AKT1	-1.39255690992245	9.65627839643652	-16.8551863183665	8.86274736727978e-50	2.19241533339543e-48	102.414068122296	AKT1	down-regulated
GCLM	1.00355462318553	9.6239131403118	16.8549090592713	8.88827159999902e-50	2.1960348496027e-48	102.411206212429	GCLM	not-changed
CYBC1	-0.759262696361111	11.6489710467706	-16.8506803445056	9.28678760145314e-50	2.29168818644916e-48	102.367558091761	CYBC1	not-changed
ARL1	0.745709882680451	10.7896503340757	16.8490084190817	9.449229377724e-50	2.32892314772975e-48	102.35030142022	ARL1	not-changed
DPY30	0.823549214555577	11.9273028953229	16.844160654049	9.93645162124409e-50	2.44601710788647e-48	102.30026769263	DPY30	not-changed
ALDH16A1	-0.877933267051091	9.31329175946548	-16.8412807635594	1.0237691743742e-49	2.51709882006809e-48	102.270545904976	ALDH16A1	not-changed
ZNF282	-1.47439902565122	8.55835634743875	-16.840037505573	1.03705407448156e-49	2.54665617486269e-48	102.257715266211	ZNF282	down-regulated
LIPT1	0.822514257307612	9.64488195991091	16.8333239711947	1.11182406492449e-49	2.7269446439103e-48	102.188434101022	LIPT1	not-changed
NRDC	-0.64998852654603	11.4557037861915	-16.8267794246607	1.18989086807123e-49	2.91487117754363e-48	102.120902809819	NRDC	not-changed
CENPB	-1.00699992046132	8.25500222717149	-16.8256592329063	1.20379148438369e-49	2.9453446743519e-48	102.109344466503	CENPB	not-changed
GABBR1	-2.24424229469079	7.83770155902004	-16.807073370033	1.45959068566301e-49	3.56688579559418e-48	101.917597490428	GABBR1	down-regulated
SMG1P5	-1.98183467886259	8.09563697104677	-16.8053431661981	1.48600407117277e-49	3.62703729768936e-48	101.899749729881	SMG1P5	down-regulated
MAVS	-1.63165734738517	9.57467706013363	-16.8010440264239	1.5537201825418e-49	3.78773308346133e-48	101.85540414657	MAVS	down-regulated
TMEM238L	-1.10699325909723	7.83017371937639	-16.8008483168544	1.55687511896593e-49	3.79084049196522e-48	101.853385465554	TMEM238L	not-changed
SPHK2	-0.795697593955065	9.31879287305122	-16.7937041080154	1.676529866902e-49	4.07726401044768e-48	101.779698911332	SPHK2	not-changed
CCDC177	-2.13876569894611	5.45049665924276	-16.7899463819308	1.74310821406231e-49	4.23407285586869e-48	101.740943958713	CCDC177	down-regulated
SC5D	1.1130488765162	10.3162316258352	16.7884767037254	1.76986017622119e-49	4.29388098830269e-48	101.725787107981	SC5D	not-changed
MBD3	-0.816117518393334	10.6636859688196	-16.7848996822249	1.83669728310113e-49	4.45067955824543e-48	101.688898402314	MBD3	not-changed
KDELR1	-0.664995625372841	11.7764788418708	-16.7829646836307	1.87389760273072e-49	4.53537209707733e-48	101.668944112017	KDELR1	not-changed
ASXL2	-0.928452276794586	10.9904008908686	-16.7800977259544	1.93040265242014e-49	4.6665285222353e-48	101.639380141618	ASXL2	not-changed
SMIM15	0.839530841121503	11.8957327394209	16.7792874300191	1.94667905974604e-49	4.70023910461556e-48	101.631024606068	SMIM15	not-changed
TPR	-0.790242075959432	11.1813207126949	-16.7747686279829	2.03999410304318e-49	4.91965563534132e-48	101.584429724155	TPR	not-changed
UBQLN2	0.824693577251933	11.7688908685969	16.770270760129	2.137312592129e-49	5.14819105972674e-48	101.538053546877	UBQLN2	not-changed
CHD2	-1.22232097832572	9.76881959910913	-16.7684864145096	2.17719213867853e-49	5.23799173125272e-48	101.519656477325	CHD2	down-regulated
FARSA	-0.814726565917679	10.0445233853007	-16.7668986623311	2.21330228150544e-49	5.31852053604663e-48	101.503286713828	FARSA	not-changed
ZNF875	-1.22196854245377	8.31457906458797	-16.7665989555366	2.22018530261488e-49	5.32870903404983e-48	101.500196769276	ZNF875	down-regulated
DPP9	-1.99251731954664	8.58577951002227	-16.7613137630598	2.34513780705924e-49	5.62191716148887e-48	101.4457090848	DPP9	down-regulated
CTDSP2	-0.962177271823423	11.711986636971	-16.7603937172756	2.36759637961886e-49	5.66901551181661e-48	101.43622427602	CTDSP2	not-changed
SKAP2	1.17159719626168	12.1332004454343	16.7569227290741	2.45427504870006e-49	5.86958947293497e-48	101.400442718482	SKAP2	not-changed
KCNS1	-1.69685794392523	7.31965256124722	-16.751820008707	2.58748859996193e-49	6.18084806443512e-48	101.347843124224	KCNS1	down-regulated
LACTB2	1.64849349771326	9.4747728285078	16.7501792540319	2.63183856439148e-49	6.27934879250848e-48	101.330930764237	LACTB2	up-regulated
RPL24	0.753147842513417	15.464706013363	16.7491544589577	2.65992334369805e-49	6.33885514566152e-48	101.320367706416	RPL24	not-changed
ARF6	1.07134977132631	12.350280623608	16.7460466703854	2.7469364680055e-49	6.53848714657131e-48	101.288335136524	ARF6	not-changed
ACHE	-2.33278256114536	5.77894877505568	-16.7416306968025	2.87548824542728e-49	6.83640548538436e-48	101.242821205087	ACHE	down-regulated
CHIC2	0.80340027838537	10.2948485523385	16.7247418463975	3.42504636420485e-49	8.13337570656466e-48	101.068779113825	CHIC2	not-changed
WDR6	-0.968630045734733	10.465868596882	-16.7231917534475	3.48046183160842e-49	8.25524599847733e-48	101.052807209472	WDR6	not-changed
FANCC	-0.7793091469477	8.45075278396437	-16.7211024135678	3.55657471531504e-49	8.42586402296904e-48	101.031279534542	FANCC	not-changed
RELL2	-1.02574301053888	8.98087750556793	-16.7164499026625	3.73208701619693e-49	8.83129182318619e-48	100.98334426489	RELL2	not-changed
ZNHIT3	0.859301093656791	11.2918619153675	16.7161897374084	3.74215303884993e-49	8.84473006052209e-48	100.9806638483	ZNHIT3	not-changed
TRIM67-AS1	-1.1533806124478	7.59202227171492	-16.7123604522386	3.8934868687103e-49	9.19163802811105e-48	100.941212813009	TRIM67-AS1	not-changed
NAPA	-0.858383117916091	10.2275968819599	-16.7077976691389	4.08180876280959e-49	9.62495280315838e-48	100.894207685008	NAPA	not-changed
GALNT2	-1.2941873334659	10.4871670378619	-16.706044796811	4.15655087376407e-49	9.78974558013521e-48	100.87615064102	GALNT2	down-regulated
ACBD4	-1.53616223901373	8.10757015590201	-16.7005543095851	4.39962486013549e-49	1.03501559866034e-47	100.81959376814	ACBD4	down-regulated
HNMT	1.34901893020481	11.5658218262806	16.697135820467	4.55808656083319e-49	1.07104409269182e-47	100.784382490864	HNMT	up-regulated
GGA3	-1.0717282759992	9.64853897550111	-16.6959942994801	4.61226037649857e-49	1.08251200757378e-47	100.772624917914	GGA3	not-changed
NCK1	0.793412328494714	11.2804966592428	16.6938955931305	4.71354325831569e-49	1.1049970422198e-47	100.751008902144	NCK1	not-changed
FBXL19	-1.74116937760987	7.46531180400891	-16.692201543796	4.7969152720826e-49	1.12323587456977e-47	100.733561187982	FBXL19	down-regulated
CSNK1G3	0.895889421356131	9.88981959910913	16.6868327136891	5.07099442475374e-49	1.18603617862483e-47	100.678268114336	CSNK1G3	not-changed
RPS27A	0.675078962020271	15.6570334075724	16.685386775244	5.14744643875699e-49	1.20252222076222e-47	100.663377240042	RPS27A	not-changed
ERF	-1.18080349970174	8.11307126948775	-16.6813601464494	5.36646934198208e-49	1.2522382917095e-47	100.621910932615	ERF	not-changed
FKBP3	0.900087810697961	12.5433184855234	16.6804858293937	5.41524300614467e-49	1.26215854620674e-47	100.612907506157	FKBP3	not-changed
PTER	1.34323501690197	9.73264810690423	16.676901914678	5.61984124482125e-49	1.30831790818502e-47	100.576002696108	PTER	up-regulated
GINM1	0.992615609465101	10.3205590200445	16.6767914830715	5.62626668516647e-49	1.30831790818502e-47	100.574865573083	GINM1	not-changed
SLC25A34	-1.39146778683635	7.86984855233853	-16.6711667764821	5.96342937785426e-49	1.38512326828249e-47	100.516949852567	SLC25A34	down-regulated
CCNC	0.946126188108964	12.2531759465479	16.6691926944929	6.086485001572e-49	1.41207852838542e-47	100.496624475602	CCNC	not-changed
COPB1	0.690985822231054	13.7734276169265	16.6682661374406	6.14511377327434e-49	1.42404182509177e-47	100.487084731234	COPB1	not-changed
SPRTN	0.841823026446607	8.08437416481069	16.6605534068934	6.65555200501495e-49	1.54055779532843e-47	100.407680007509	SPRTN	not-changed
LAMTOR3	0.85857202227084	11.3713229398664	16.6602640401728	6.67550562399409e-49	1.54340445969432e-47	100.40470106381	LAMTOR3	not-changed
TJAP1	-0.703579081328296	10.3639532293987	-16.6582620690991	6.81519998262522e-49	1.57389744386835e-47	100.384091704178	TJAP1	not-changed
FAM219B	-1.17202555179956	9.80218262806236	-16.6512786233626	7.32574531132597e-49	1.6898667187831e-47	100.312204939957	FAM219B	not-changed
TBC1D13	-0.802031775700939	9.51693986636971	-16.6498619098923	7.43388857232021e-49	1.71285288578912e-47	100.297622324135	TBC1D13	not-changed
TMEM267	0.975151362099812	9.54469487750557	16.6449107349679	7.82450694695465e-49	1.80079776892184e-47	100.246660833058	TMEM267	not-changed
DCAF11	-0.709235315172004	9.88895100222717	-16.6420530337304	8.0592239780321e-49	1.85270256124407e-47	100.217248689522	DCAF11	not-changed
SKP1	0.667409445217739	14.4778886414254	16.640947472873	8.15190398601159e-49	1.8718739893164e-47	100.205870312634	SKP1	not-changed
LOC155060	-1.88199606283556	8.64519599109131	-16.6405281446225	8.18733434468024e-49	1.87787085009213e-47	100.201554653952	LOC155060	down-regulated
HSP90B1	2.03502499502883	11.4874632516704	16.6400295143561	8.22966538979591e-49	1.88543504458722e-47	100.196422865114	HSP90B1	up-regulated
NCBP3	-0.645763153708499	9.42258574610245	-16.6378529549745	8.41701782298662e-49	1.92616908432728e-47	100.174022637889	NCBP3	not-changed
NBEAL1	1.3440432491549	7.08188864142539	16.6342833169359	8.73354819117122e-49	1.99633860637418e-47	100.137286932936	NBEAL1	up-regulated
ATP6V0C	-0.882442931000194	12.5993296213808	-16.630896120383	9.04488501084774e-49	2.06516338282787e-47	100.102430484047	ATP6V0C	not-changed
MORN1	-1.83496080731755	6.73311581291759	-16.6289545153235	9.22832158375885e-49	2.10466279920998e-47	100.082450865773	MORN1	down-regulated
RPE	0.839992881288547	10.5770423162584	16.6227287694874	9.84193968906046e-49	2.24207170701862e-47	100.018390054128	RPE	not-changed
SLC23A3	-1.65775790415589	7.70716481069042	-16.6220759723003	9.90859498834383e-49	2.25470861805869e-47	100.011673321711	SLC23A3	down-regulated
LAMTOR5	0.887782680453382	12.8917728285078	16.6196705507065	1.01581205376793e-48	2.30888239188446e-47	99.9869241021012	LAMTOR5	not-changed
MAPK8IP3	-1.37139958242195	9.29677505567929	-16.6193037305869	1.01967200495395e-48	2.31504586620233e-47	99.9831499893896	MAPK8IP3	down-regulated
RUSC1	-0.961959117120696	9.6714565701559	-16.6146945080242	1.0694404018195e-48	2.42530797987434e-47	99.9357286328082	RUSC1	not-changed
SEZ6	-2.04879803141778	6.42190423162584	-16.612621121621	1.09261199149605e-48	2.47507307421932e-47	99.9143978981576	SEZ6	down-regulated
LRP8	-0.957532252933001	9.13910690423163	-16.6068152976299	1.16019852377128e-48	2.62522586282299e-47	99.8546716872878	LRP8	not-changed
TSPYL2	-1.24416677271825	9.81240757238307	-16.606101651274	1.16878926003091e-48	2.64169958200484e-47	99.8473305408743	TSPYL2	down-regulated
CDPF1	-0.819575402664542	8.51075278396437	-16.6056438779283	1.17433325983289e-48	2.65125787810648e-47	99.8426215517054	CDPF1	not-changed
ATMIN	0.756922350367871	10.4452071269488	16.6020270590098	1.21906934880688e-48	2.74917865115163e-47	99.8054174112166	ATMIN	not-changed
OR51B6	-1.50040546828396	6.59975278396437	-16.600319871861	1.24077270441096e-48	2.79499647973512e-47	99.7878572270902	OR51B6	down-regulated
PTMS	-1.96334372638695	6.63902449888641	-16.5995437480898	1.25076668776034e-48	2.81436464195716e-47	99.7798741342371	PTMS	down-regulated
TNPO2	-0.932945396699152	10.693710467706	-16.5968565533005	1.28599423287223e-48	2.89040465205541e-47	99.7522347382355	TNPO2	not-changed
TTYH3	-1.27760035792405	9.24038752783964	-16.5964510338282	1.2913957201117e-48	2.89931281883876e-47	99.7480638219981	TTYH3	down-regulated
LRRC52	-2.28431181149334	6.7465144766147	-16.5956007030401	1.3027957353953e-48	2.92165348401609e-47	99.7393179374262	LRRC52	down-regulated
CNIH1	0.952963929210577	12.6419242761693	16.5932338277004	1.33505935642042e-48	2.99068129831024e-47	99.7149745404178	CNIH1	not-changed
ZCCHC10	0.977856213959038	10.7739287305122	16.5866513357551	1.42904428513534e-48	3.19766502026788e-47	99.6472777346563	ZCCHC10	not-changed
LOC100507477	-2.2136172797773	5.84447661469933	-16.5831702989687	1.4813885956848e-48	3.31111701525513e-47	99.6114800467314	LOC100507477	down-regulated
ZNF585A	1.36792716245774	9.16208908685969	16.5828892646202	1.48569711202793e-48	3.31706970936823e-47	99.6085900723728	ZNF585A	up-regulated
ZNF14	0.990260290316172	9.15029175946548	16.5736517172962	1.63450252991355e-48	3.64526609575077e-47	99.513603673757	ZNF14	not-changed
SUGP2	-1.05091805527938	10.0671425389755	-16.5730579620329	1.64456106967593e-48	3.66364593654546e-47	99.5074987342437	SUGP2	not-changed
LTB4R	-1.8670398687612	7.80435412026726	-16.5703281725915	1.69160644595982e-48	3.76429112108124e-47	99.4794319536432	LTB4R	down-regulated
NIPSNAP1	-0.750622867369273	10.4787995545657	-16.5646460027685	1.79388784296833e-48	3.98749424499277e-47	99.4210133455928	NIPSNAP1	not-changed
LYSMD3	0.818441320342014	10.167864142539	16.5584705658744	1.91206300195667e-48	4.24549583507141e-47	99.3575288989644	LYSMD3	not-changed
RBM38	-1.28345768542454	10.5783830734967	-16.5543526929771	1.99515307458214e-48	4.4251134363752e-47	99.3151996933982	RBM38	down-regulated
WDFY4	-1.0826796579837	10.8429576837416	-16.5540165321143	2.00209321199113e-48	4.4356265106542e-47	99.3117442779941	WDFY4	not-changed
CSK	-0.871798588188502	12.7552071269488	-16.5535385416115	2.01200299365298e-48	4.45268851317649e-47	99.306831017271	CSK	not-changed
WWTR1	1.58554647047126	9.23159688195991	16.5514446239061	2.05599495758676e-48	4.5450563969196e-47	99.2853080559959	WWTR1	up-regulated
MPP2	-2.00310497116722	6.80631625835189	-16.5508390531318	2.06889578340957e-48	4.56856603387956e-47	99.2790836374415	MPP2	down-regulated
STYX	0.937812427918074	10.3531113585746	16.5451115441419	2.19498145724087e-48	4.84168721656819e-47	99.2202155910089	STYX	not-changed
RPL15	0.852938417180356	15.3065144766147	16.5427022125812	2.25028701443333e-48	4.95825535497164e-47	99.1954536521295	RPL15	not-changed
PAQR6	-1.97971483396302	7.44086859688196	-16.5411318729764	2.28708061329256e-48	5.03382448085059e-47	99.1793149335989	PAQR6	down-regulated
NSL1	0.870939451183137	11.9034855233853	16.5329530640367	2.48865052922689e-48	5.47150308830353e-47	99.0952655393958	NSL1	not-changed
CNBP	0.630059972161455	13.6090022271715	16.5302387346836	2.55939248451231e-48	5.62090543357871e-47	99.0673740018766	CNBP	not-changed
ARSK	-2.20278170610459	7.52115590200445	-16.5287605139255	2.59875943776464e-48	5.70115223338117e-47	99.05218476794	ARSK	down-regulated
RSAD1	-0.79665404653014	9.60220935412027	-16.5278400381803	2.62357781102173e-48	5.74934263565316e-47	99.042726724842	RSAD1	not-changed
AKR1C3	2.22898089083317	7.00336080178174	16.5267521162632	2.65321631998324e-48	5.80580628487647e-47	99.0315483087637	AKR1C3	up-regulated
NUP188	-0.974751322330484	9.8835723830735	-16.5266832702529	2.65510311723431e-48	5.80580628487647e-47	99.0308409208451	NUP188	not-changed
HDAC7	-1.43641519188705	9.32672383073497	-16.5222995401189	2.77804408998295e-48	6.06468446603942e-47	98.9857998731763	HDAC7	down-regulated
VBP1	0.908407973752228	12.8671180400891	16.5222484758151	2.77950917445584e-48	6.06468446603942e-47	98.9852752252617	VBP1	not-changed
PLXNA3	-1.61307448796977	8.16452115812918	-16.5182467400199	2.89675521597657e-48	6.31367371992471e-47	98.9441615768955	PLXNA3	down-regulated
PSMD11	-0.88530930602507	11.6903251670379	-16.5176476736695	2.91472715719589e-48	6.34598425661192e-47	98.9380070050554	PSMD11	not-changed
B3GALT6	-0.837582322529329	9.64524276169265	-16.5156476005725	2.97553950476755e-48	6.47139719046586e-47	98.9174594342369	B3GALT6	not-changed
RXRB	-0.785470491151321	10.0282672605791	-16.5114888334857	3.10607353059968e-48	6.74801168646768e-47	98.8747366516237	RXRB	not-changed
DCAF7	-0.809626347186329	11.6949755011136	-16.5034738775416	3.37399139177722e-48	7.3221787351583e-47	98.7924068423976	DCAF7	not-changed
ZNF836	-1.11120707894213	8.43674832962138	-16.5031678850684	3.38466505263451e-48	7.33744431464133e-47	98.7892638737554	ZNF836	not-changed
NAA40	-1.18789904553589	9.59166815144766	-16.5021873196568	3.41909691943258e-48	7.40412599276909e-47	98.7791921977295	NAA40	not-changed
TSR2	-0.894185404653024	9.64292873051225	-16.4981403925535	3.56494195448331e-48	7.71167325583026e-47	98.7376265622239	TSR2	not-changed
NECAP2	-0.847263014515811	11.3992160356347	-16.4966455734584	3.62037017759873e-48	7.82318147380149e-47	98.7222740347142	NECAP2	not-changed
ZER1	-1.90467200238616	7.81292873051225	-16.4951504742411	3.67666960480777e-48	7.93633146708024e-47	98.706918969921	ZER1	down-regulated
RPL13AP17	-1.55927542254921	6.91116258351893	-16.4890260247282	3.9165645563263e-48	8.44511850482294e-47	98.6440228012778	RPL13AP17	down-regulated
HINT1	0.762343706502273	14.4683229398664	16.4883758505757	3.94293231575778e-48	8.49289085662314e-47	98.6373460526664	HINT1	not-changed
PGLYRP4	-1.48350849075363	7.05618485523385	-16.4828412023026	4.1746886464701e-48	8.98248642491821e-47	98.5805124196855	PGLYRP4	down-regulated
ASB16	-1.76524322927024	7.4527995545657	-16.4816660748768	4.2256199145997e-48	9.08237986122009e-47	98.5684459920316	ASB16	down-regulated
MCM3AP	-0.948465858023466	10.6231046770601	-16.4797885072395	4.30828646591581e-48	9.25019844934277e-47	98.5491672146595	MCM3AP	not-changed
MCM3	-1.18828013521575	11.4855077951002	-16.4789691875244	4.34486417279955e-48	9.31880921146933e-47	98.5407546465404	MCM3	not-changed
FAM160A1	-1.11195989262278	7.79267037861915	-16.4784687729475	4.3673570540655e-48	9.35709729723853e-47	98.5356165663547	FAM160A1	not-changed
NADSYN1	-0.864862437860415	10.1103385300668	-16.4747952646277	4.53607467351135e-48	9.70825918181129e-47	98.4978994514929	NADSYN1	not-changed
CORO7	-1.25271813481806	8.63080846325167	-16.4641768977781	5.06124761024867e-48	1.08207649067045e-46	98.3888888069117	CORO7	down-regulated
NDUFS1	0.71962730165043	10.8375679287305	16.4620455189122	5.17376497514381e-48	1.1049605472868e-46	98.3670096538505	NDUFS1	not-changed
COLGALT1	-0.887446192085894	10.754864142539	-16.4614832766993	5.20386034260204e-48	1.11021194039365e-46	98.3612382089038	COLGALT1	not-changed
CHKA	-1.67680789421356	8.55000445434298	-16.4590402386634	5.33667306731236e-48	1.13734318932436e-46	98.3361608626141	CHKA	down-regulated
MIDEAS	-1.06408417180354	9.90812694877506	-16.4558394133325	5.51581770133742e-48	1.17428089415696e-46	98.303306353386	MIDEAS	not-changed
ASXL3	-1.79285056671307	6.69730957683742	-16.4507797391329	5.8113261454276e-48	1.23588762044268e-46	98.251375113558	ASXL3	down-regulated
MKS1	-0.956905150129246	7.81160579064588	-16.4483509181781	5.95874513688708e-48	1.26590369551929e-46	98.2264476979434	MKS1	not-changed
OTUD6B-AS1	1.21012666534102	9.74772160356348	16.4459924808592	6.10546470761139e-48	1.29570814705424e-46	98.2022435115784	OTUD6B-AS1	up-regulated
RAB28	0.73826088685623	10.5623340757238	16.4437298312134	6.24961468956147e-48	1.32490517093847e-46	98.1790231814785	RAB28	not-changed
HIKESHI	1.11090035792402	11.8303608017817	16.443085501633	6.29128216657796e-48	1.33233760252498e-46	98.1724109254589	HIKESHI	not-changed
ATAD3A	-0.896401113541465	9.61881737193764	-16.4394453015609	6.53195119544312e-48	1.38185380956274e-46	98.1350555716583	ATAD3A	not-changed
LGALS9	-1.422861741897	9.48072828507795	-16.4359163308926	6.77403889950418e-48	1.43156601942247e-46	98.0988435959406	LGALS9	down-regulated
ZNF573	1.22574925432492	8.52927394209354	16.432789140103	6.99604108744166e-48	1.47693386768493e-46	98.066756029831	ZNF573	up-regulated
CCDC14	-1.07855508053291	10.425859688196	-16.4310218123445	7.12470329245764e-48	1.50252241714685e-46	98.0486224531669	CCDC14	not-changed
AMT	-1.30616486379002	8.60273496659243	-16.4239505598956	7.66357002295894e-48	1.61447476732367e-46	97.9760730663751	AMT	down-regulated
ZNF777	-1.15791839331875	9.08909354120267	-16.4222704539006	7.7974748929555e-48	1.64096963796321e-46	97.9588367137141	ZNF777	not-changed
BPIFA3	-1.66830258500696	7.12368374164811	-16.4175747738543	8.18424085381485e-48	1.72056809023734e-46	97.9106656495633	BPIFA3	down-regulated
DYNLT3	0.795432988665743	11.1050512249443	16.416511567335	8.27443967628922e-48	1.7377185241007e-46	97.899759123533	DYNLT3	not-changed
CDC25B	-1.04073414197654	10.849013363029	-16.4162416493677	8.29749615725273e-48	1.74074734678847e-46	97.8969902940011	CDC25B	not-changed
ZFYVE26	-0.842435315172017	9.56666592427617	-16.4122670923208	8.64452678481751e-48	1.80993709717397e-46	97.856220436974	ZFYVE26	not-changed
NIT1	-0.764464525750663	10.3137683741648	-16.4122582051806	8.64531876593839e-48	1.80993709717397e-46	97.8561292780123	NIT1	not-changed
ATF2	0.905960946510248	10.8047772828508	16.4121582617632	8.65423025482719e-48	1.80993709717397e-46	97.8551041191414	ATF2	not-changed
DNAJB2	-1.45633827798768	9.03196436525612	-16.4101690857955	8.83351626950381e-48	1.84551835761105e-46	97.8347006836483	DNAJB2	down-regulated
CYP2C9	-1.74209349771326	6.78721603563474	-16.4046809531787	9.34763151215742e-48	1.95090682108288e-46	97.7784108403934	CYP2C9	down-regulated
BAP1	-0.926195983296871	9.74289755011136	-16.3973076062467	1.00856912184309e-47	2.10276753520977e-46	97.7027924125499	BAP1	not-changed
SDE2	0.850005647245975	11.3688017817372	16.3965731162043	1.01623264983542e-47	2.11655645179048e-46	97.6952602084325	SDE2	not-changed
RABL6	-0.695038735335064	9.74353006681515	-16.3936496025794	1.04731670326234e-47	2.17904561965657e-46	97.6652803772329	RABL6	not-changed
SRSF5	-0.801207973752238	12.6657750556793	-16.3914438083207	1.07139647214858e-47	2.22684786340077e-46	97.6426614461962	SRSF5	not-changed
DNTTIP2	0.555649313978922	11.7062093541203	16.3897077762817	1.09073616225962e-47	2.26470975976479e-46	97.6248601450314	DNTTIP2	not-changed
PCYT2	-0.956960628355542	8.82672828507795	-16.3853419051756	1.14092735872464e-47	2.36648523449049e-46	97.5800945167169	PCYT2	not-changed
HMG20B	-0.852908888447002	9.6483719376392	-16.3798549693073	1.20728967249098e-47	2.50155879620664e-46	97.5238382452278	HMG20B	not-changed
SNRNP40	-1.49079411413799	8.85880178173719	-16.3760818592401	1.25514702932434e-47	2.59805125854292e-46	97.485156171461	SNRNP40	down-regulated
NLRC5	-1.51824702724201	11.1880066815145	-16.3684390657314	1.35796952879656e-47	2.80800242769923e-46	97.4068088082505	NLRC5	down-regulated
NFRKB	-0.797257407039176	9.06424944320713	-16.3624816058153	1.44391686068571e-47	2.98266473650458e-46	97.3457444184544	NFRKB	not-changed
MIGA2	-1.09463801948698	8.39025389755011	-16.3563841664297	1.53751053333263e-47	3.17274819473071e-46	97.2832510266099	MIGA2	not-changed
MGRN1	-0.858992821634518	9.99961692650334	-16.3543742262244	1.56967120725821e-47	3.23580175966592e-46	97.2626521938931	MGRN1	not-changed
MRPL13	1.09654126068802	11.2270957683742	16.3539794075217	1.57606712199042e-47	3.24566795162909e-46	97.2586059772139	MRPL13	not-changed
ESRRA	-0.632479836945706	9.59518485523385	-16.3498622155688	1.64433465670018e-47	3.38279908303391e-46	97.2164132679852	ESRRA	not-changed
PDPR	-1.08923875521973	10.2816102449889	-16.3477521066233	1.68045901204578e-47	3.45359165564271e-46	97.1947900516931	PDPR	not-changed
MFN2	-0.841044263273023	9.99669487750557	-16.3472727649942	1.6887750130822e-47	3.46714796728617e-46	97.189878125053	MFN2	not-changed
COMMD8	0.986133545436466	12.4464142538976	16.346335088725	1.70516156946266e-47	3.49722913549712e-46	97.1802696405792	COMMD8	not-changed
LOC101927513	-1.06920079538676	7.79307126948775	-16.3459405318694	1.71210409959945e-47	3.50789946666915e-46	97.1762266094173	LOC101927513	not-changed
WWOX	-0.71870298270033	9.18091091314031	-16.3425346397695	1.77321897286092e-47	3.62942819409634e-46	97.1413273979356	WWOX	not-changed
PSG6	-1.89570861006164	6.60349443207127	-16.3396123364586	1.82738975198636e-47	3.73651164196724e-46	97.1113848502733	PSG6	down-regulated
CALR	-0.803694074368648	12.4451603563474	-16.3371271657126	1.87475554085682e-47	3.82947785807644e-46	97.0859223233342	CALR	not-changed
DENND4B	-0.943529488964018	11.2739042316258	-16.3367214763748	1.88260328557123e-47	3.84161587453456e-46	97.0817658104367	DENND4B	not-changed
YLPM1	-0.776431835354929	10.7788262806236	-16.3248001076503	2.12845232755128e-47	4.33890064466747e-46	96.9596364424477	YLPM1	not-changed
ARR3	-1.97250520978327	6.30544097995546	-16.3208727373112	2.21626974360451e-47	4.51335497987984e-46	96.919407155019	ARR3	down-regulated
CAMK2B	-0.919616524159876	8.18027171492205	-16.3194734226367	2.24842544361641e-47	4.57421850340569e-46	96.9050741299486	CAMK2B	not-changed
BICRA	-1.06502415987274	8.66186191536748	-16.3156507707864	2.33866287987834e-47	4.75300225012371e-46	96.8659207242345	BICRA	not-changed
NMUR2	-1.82463342612846	6.51037416481069	-16.3146746560336	2.36227892016327e-47	4.79616367667792e-46	96.8559232700167	NMUR2	down-regulated
SPARCL1	1.38282008351562	11.7759532293987	16.3116016306399	2.43819354351112e-47	4.94158453927029e-46	96.8244500647867	SPARCL1	up-regulated
GOLGA7	0.678118512626765	12.1334565701559	16.3115772320327	2.43880592062593e-47	4.94158453927029e-46	96.8242001860172	GOLGA7	not-changed
CKAP5	-0.821224975144167	10.3484899777283	-16.3111424478168	2.44974429562929e-47	4.9587645325484e-46	96.8197473517077	CKAP5	not-changed
LOC101929398	-1.81108906343209	6.61847216035635	-16.3090055053579	2.50422208769721e-47	5.06395401304549e-46	96.7978623356372	LOC101929398	down-regulated
RETSAT	-0.71668538476834	9.07676614699332	-16.3086125746909	2.5143700754585e-47	5.07938026967122e-46	96.7938383040374	RETSAT	not-changed
KCTD2	-0.753532272817655	9.20509799554566	-16.3040613589493	2.6349469096296e-47	5.31763409860283e-46	96.7472307736311	KCTD2	not-changed
ANXA7	0.630598011533113	11.9961224944321	16.2880120221032	3.10811146552115e-47	6.2662635256372e-46	96.5829012222376	ANXA7	not-changed
ERCC3	-0.725136846291498	9.43142316258352	-16.2833891103212	3.25951626986768e-47	6.56494580587436e-46	96.5355747997421	ERCC3	not-changed
LINC00668	-1.87512507456751	6.59139420935412	-16.2812702331451	3.33135138817444e-47	6.70293167035778e-46	96.513884237509	LINC00668	down-regulated
TYMP	-1.48334820043746	10.2151804008909	-16.2778005689869	3.45241087330592e-47	6.93958680126826e-46	96.4783674770993	TYMP	down-regulated
SMG9	-1.03119787234042	8.65021380846325	-16.2750606111698	3.55110636915466e-47	7.13086210244294e-46	96.4503216327184	SMG9	not-changed
IQCB1	-0.916342374229469	10.0682449888641	-16.2692475469107	3.76992549432567e-47	7.56273312349251e-46	96.3908238958177	IQCB1	not-changed
FPGS	-0.793070590574667	9.84905345211581	-16.2683415782576	3.80522069512797e-47	7.62594974497764e-46	96.3815516392526	FPGS	not-changed
RAB3IL1	-1.23277068999802	8.76149443207127	-16.267107842391	3.85381640562173e-47	7.7150159522278e-46	96.3689250191985	RAB3IL1	down-regulated
ITGAV	1.3033386557964	11.5046414253898	16.266976162506	3.85903961451266e-47	7.7150159522278e-46	96.3675773612692	ITGAV	up-regulated
ATP6V0D2	-1.35612750049712	7.96168374164811	-16.2669231766283	3.86114334397989e-47	7.7150159522278e-46	96.3670350860852	ATP6V0D2	down-regulated
MAPK12	-1.89646989461126	7.85589755011136	-16.2617485773839	4.07220797163463e-47	8.12869157585404e-46	96.3140786983585	MAPK12	down-regulated
SVEP1	-1.9043513819845	6.73039643652561	-16.2568147488311	4.28417065966206e-47	8.5433397299156e-46	96.2635903791191	SVEP1	down-regulated
MTFR1	0.973325014913504	9.79387973273942	16.2562601561014	4.30867493586859e-47	8.58371495870027e-46	96.2579154279131	MTFR1	not-changed
TMEM63B	-1.09667208192484	8.16308017817372	-16.2556158057484	4.3373208922163e-47	8.63225335715428e-46	96.2513220814175	TMEM63B	not-changed
SLC35A4	-0.953136965599528	10.3803251670379	-16.2542122296956	4.40037980381563e-47	8.7491180694997e-46	96.2369601542269	SLC35A4	not-changed
ATP5F1C	0.629799701729958	13.7417973273942	16.2537183017533	4.42278773000158e-47	8.78500723394699e-46	96.2319061706614	ATP5F1C	not-changed
LINC00092	-1.07685402664546	7.90610022271715	-16.2444930295614	4.86288494533204e-47	9.64966765579127e-46	96.137518367199	LINC00092	not-changed
POLM	-2.11913396301451	7.83157683741648	-16.2413444521261	5.02288740885903e-47	9.9573680481816e-46	96.1053070624564	POLM	down-regulated
JOSD2	-1.46529576456551	8.15617594654788	-16.2387783035848	5.15717229477532e-47	1.02135314965585e-45	96.0790554516492	JOSD2	down-regulated
ITGB3BP	1.10846259693776	11.3660712694878	16.2330133744376	5.47206370634866e-47	1.0826523688292e-45	96.0200843443331	ITGB3BP	not-changed
TPRKB	1.03439242394114	11.6198151447661	16.2294032042946	5.67895992516217e-47	1.12248540246269e-45	95.983157646795	TPRKB	not-changed
PPA1	0.944296957645639	14.0308062360802	16.2292433245446	5.68830098902104e-47	1.12323052144616e-45	95.9815223628447	PPA1	not-changed
SLC35G1	-1.04225983296878	7.61140534521158	-16.2252919936308	5.92409827346911e-47	1.16864721420167e-45	95.941108642054	SLC35G1	not-changed
MTMR4	-0.807432988665736	10.2332293986637	-16.2246776254956	5.96162757805528e-47	1.17490101271918e-45	95.9348251907793	MTMR4	not-changed
IKBKG	-0.774077987671507	9.94545879732739	-16.2226403708725	6.08778236790528e-47	1.19859160468104e-45	95.9139896075676	IKBKG	not-changed
TAF1C	-1.12945177967786	9.02455902004454	-16.222045180504	6.12513951102719e-47	1.20376551172919e-45	95.9079025544983	TAF1C	not-changed
SHARPIN	-1.47886643467886	8.31479732739421	-16.2220314698392	6.12600275300901e-47	1.20376551172919e-45	95.9077623352652	SHARPIN	down-regulated
RHEB	0.740811214953272	12.5856815144766	16.2164324768206	6.4888730014236e-47	1.27382832114607e-45	95.8505039016419	RHEB	not-changed
ZNF589	-1.492261741897	9.07005122494432	-16.2122175688969	6.77613111922573e-47	1.32892587057111e-45	95.8074032898627	ZNF589	down-regulated
MAMDC4	-2.32431415788427	7.05232962138085	-16.2081160077929	7.06784836293e-47	1.38478999849399e-45	95.7654645367743	MAMDC4	down-regulated
BNIP3L	0.925248260091477	12.011135857461	16.2064826973014	7.18747620642631e-47	1.40686124075496e-45	95.7487645913118	BNIP3L	not-changed
SEC31B	-2.34314126068801	7.81135634743875	-16.2058683225969	7.2329959981096e-47	1.41439798562452e-45	95.7424829696799	SEC31B	down-regulated
ZNF135	-1.66429477033207	6.72524498886414	-16.2056362636221	7.25026433440918e-47	1.41588246658299e-45	95.7401103186968	ZNF135	down-regulated
SGCE	1.26920033803938	9.3927706013363	16.2055776412515	7.25463314309921e-47	1.41588246658299e-45	95.7395109447663	SGCE	up-regulated
FAM160B2	-1.14068761185127	9.02599109131403	-16.2026365628829	7.47722318325124e-47	1.45791389359312e-45	95.709441141846	FAM160B2	not-changed
ZMYM3	-0.805871803539475	9.84421603563474	-16.1931923410836	8.23914416472828e-47	1.60492159908296e-45	95.6128923578534	ZMYM3	not-changed
SLC25A51	-0.864546868164644	8.12627616926503	-16.1865346073589	8.82239049080675e-47	1.71687465912312e-45	95.5448388391214	SLC25A51	not-changed
ELK1	-0.926567409027632	9.68855456570156	-16.1834778121105	9.1038152546792e-47	1.76993268418117e-45	95.5135955761002	ELK1	not-changed
LEMD3	0.829960310200827	10.7439287305123	16.1800592717903	9.42917399221924e-47	1.83142174236158e-45	95.4786567776757	LEMD3	not-changed
NSA2	0.826757705309218	13.6963853006682	16.1790821235522	9.524289454551e-47	1.8481154927161e-45	95.4686703022128	NSA2	not-changed
SAE1	-0.91740005965401	11.585438752784	-16.1769823758139	9.73193205601193e-47	1.88659117481977e-45	95.4472113718199	SAE1	not-changed
C3orf38	1.04493330682043	10.5877795100223	16.1726333696995	1.01764890351776e-46	1.97087603687046e-45	95.4027678733283	C3orf38	not-changed
C1D	0.995231278584187	11.3539844097996	16.1725195554168	1.01883914733609e-46	1.97128752873732e-45	95.4016048210227	C1D	not-changed
TUBGCP2	-0.77490290316166	10.1652783964365	-16.1696006788742	1.04984359119836e-46	2.0293285371189e-45	95.3717779631772	TUBGCP2	not-changed
MRPL32	0.938310240604503	12.147135857461	16.1664326207069	1.08456181599696e-46	2.09443015060485e-45	95.3394064179473	MRPL32	not-changed
EIF4EBP2	-0.664744064426321	10.5563051224944	-16.1639429656089	1.11264803031448e-46	2.14661214728902e-45	95.3139680364769	EIF4EBP2	not-changed
FAM220A	0.928693457943938	10.7780289532294	16.1615869454688	1.13989512857599e-46	2.19707702554689e-45	95.2898960378589	FAM220A	not-changed
LMF2	-0.805804633127879	10.1862182628062	-16.1594380870411	1.16532690060813e-46	2.24394991816241e-45	95.2679414639802	LMF2	not-changed
CREBZF	-1.04945456353152	9.53532516703786	-16.1519150823557	1.25890846599578e-46	2.42183717394474e-45	95.1910860841999	CREBZF	not-changed
COL11A2	-1.11389876715053	7.94627394209354	-16.1475209677992	1.31700189887956e-46	2.53117972195528e-45	95.1461999672185	COL11A2	not-changed
SBNO2	-1.93899578445019	8.52136525612472	-16.1467004374392	1.32814284101155e-46	2.55016074453656e-45	95.1378185628412	SBNO2	down-regulated
NLRP8	-1.92742034201631	6.37598440979955	-16.146599157233	1.32952450466813e-46	2.55038473250373e-45	95.1367840320039	NLRP8	down-regulated
MFSD10	-1.04097160469278	9.56514699331849	-16.1453075398138	1.34727110050851e-46	2.5819707849194e-45	95.1235909030805	MFSD10	not-changed
LAPTM4A	0.738583953072164	13.1321135857461	16.143822145013	1.36797275007349e-46	2.61915466421952e-45	95.108418794609	LAPTM4A	not-changed
UTP23	0.745850864983094	10.4992494432071	16.141578393643	1.39984722089092e-46	2.67763945164914e-45	95.0855013861235	UTP23	not-changed
NALT1	-0.988451779677875	7.76476169265033	-16.1405787182197	1.41428625639713e-46	2.70269433319644e-45	95.0752910921204	NALT1	not-changed
ZNF598	-1.22499568502683	9.10385968819599	-16.1238049307193	1.67998853434823e-46	3.2074099281245e-45	94.9039951785471	ZNF598	down-regulated
RBM5	-0.948182501491354	11.7439844097996	-16.120347420156	1.74066670105306e-46	3.32011176536715e-45	94.8686925448994	RBM5	not-changed
FASTK	-0.676696878106977	10.5340890868597	-16.1200924571074	1.74522689456883e-46	3.32510334922695e-45	94.8660893448393	FASTK	not-changed
SBNO1	-0.912286001193083	9.63775278396436	-16.1200168073773	1.74658223641255e-46	3.32510334922695e-45	94.8653169550899	SBNO1	not-changed
TRIO	-1.28619304036588	8.96158574610245	-16.1198408965144	1.74973792283022e-46	3.32796851530001e-45	94.8635208949412	TRIO	down-regulated
LOC100190986	-1.64626100616425	9.24046993318485	-16.1192987391971	1.75949960246099e-46	3.34338091283845e-45	94.8579854699505	LOC100190986	down-regulated
QRICH1	-0.7390776098628	10.1666681514477	-16.1129787402468	1.87738438387369e-46	3.56402510012028e-45	94.793461948164	QRICH1	not-changed
VEZF1	0.689098488765159	10.473723830735	16.1047545252795	2.04267244720082e-46	3.87415985023666e-45	94.7095075752749	VEZF1	not-changed
MRPL2	-0.820197733147742	9.40644766146993	-16.1038533705233	2.06164462815983e-46	3.9064677958957e-45	94.7003091082595	MRPL2	not-changed
ACAP3	-1.50965937562139	8.18151670378619	-16.1016808283245	2.10811005891877e-46	3.99076121106678e-45	94.6781336174892	ACAP3	down-regulated
IRF9	-0.955471306422751	11.2754721603563	-16.0971772773659	2.20778696707329e-46	4.17553405658205e-45	94.6321676857351	IRF9	not-changed
TRMT1L	0.864408411214956	9.87238975501114	16.089824499873	2.38073769947357e-46	4.49841169251047e-45	94.5571282301879	TRMT1L	not-changed
KLF13	-1.11530797375225	11.1926703786192	-16.0879075432063	2.42800938824384e-46	4.5834360745678e-45	94.5375660574083	KLF13	not-changed
KRT2	-1.80720843109962	6.49481959910913	-16.0870558579974	2.44931130668819e-46	4.61932322302531e-45	94.5288749743992	KRT2	down-regulated
ZNF316	-0.96001841320342	8.11877728285078	-16.0851188566723	2.49845593654763e-46	4.70760468567633e-45	94.5091091636773	ZNF316	not-changed
CISD1	1.141617597932	11.1124053452116	16.081004732488	2.60612799709972e-46	4.90589603637044e-45	94.4671293769599	CISD1	not-changed
IQGAP3	-1.75044219526745	7.66044543429844	-16.0788995175626	2.66300362893203e-46	5.00828508982264e-45	94.4456492540211	IQGAP3	down-regulated
RNF220	-0.867809544641089	9.81380623608018	-16.0746130929421	2.78266708631936e-46	5.2284577005857e-45	94.401915943048	RNF220	not-changed
RABGAP1	-0.82564835951481	11.1365434298441	-16.0722075374057	2.85215911354188e-46	5.35403909572793e-45	94.3773740368135	RABGAP1	not-changed
LOC100130744	-2.65732380194869	5.57003786191537	-16.0707465230457	2.89520806996306e-46	5.42979440916514e-45	94.3624689894691	LOC100130744	down-regulated
DGLUCY	-0.804243229270226	9.84282628062361	-16.0680391333272	2.97670380647457e-46	5.57744660244739e-45	94.3348495718462	DGLUCY	not-changed
TOP1	-0.861035593557371	12.3760645879733	-16.0679154118667	2.98048221161868e-46	5.57934093486019e-45	94.3335874580997	TOP1	not-changed
RECK	-1.06894096241798	9.43903340757238	-16.0661467247318	3.03502369035695e-46	5.67617000197462e-45	94.3155449213106	RECK	not-changed
TASL	1.15441576854245	8.76478173719376	16.0645994641043	3.08355350359296e-46	5.76158685689876e-45	94.2997616142973	TASL	not-changed
UBQLN4	-0.721724259296089	10.0384922048998	-16.0605592936264	3.21395734924388e-46	5.99968464056536e-45	94.2585505435743	UBQLN4	not-changed
TRABD	-1.07943829787234	9.74596213808463	-16.0528288581383	3.47901326048496e-46	6.48847237230688e-45	94.1797053356418	TRABD	not-changed
SDR39U1	-0.67554110161065	10.7814654788419	-16.0493453752853	3.60548050130368e-46	6.71812314110754e-45	94.144179514574	SDR39U1	not-changed
KIF3C	-1.5669602704315	7.72128285077951	-16.0450945488463	3.7660398949754e-46	7.0108153575807e-45	94.1008308648659	KIF3C	down-regulated
PNMA3	-2.12995883873533	7.54810690423163	-16.0387755484045	4.0180035684297e-46	7.47296770692908e-45	94.0363973333804	PNMA3	down-regulated
CLN3	-0.876509087293702	8.99334075723831	-16.0355990113777	4.15095225452482e-46	7.71311966852303e-45	94.0040094398009	CLN3	not-changed
MYO9B	-0.859767846490355	9.91834966592428	-16.03027637829	4.38363972765734e-46	8.13798900085632e-45	93.9497438972729	MYO9B	not-changed
BEST1	-1.7300900178962	8.63463919821826	-16.0186295216349	4.9392286189309e-46	9.16097407417349e-45	93.8310183945217	BEST1	down-regulated
MYG1	-0.76378383376416	10.3235055679287	-16.0176472107386	4.98918485980909e-46	9.24512462854881e-45	93.8210060039953	MYG1	not-changed
RPL19	0.671369775303237	15.5413719376392	16.0172861289709	5.00767449704391e-46	9.27086552202959e-45	93.8173256513815	RPL19	not-changed
DIS3	0.773144402465695	10.6940111358575	16.0145251632872	5.15133315340956e-46	9.5280759363202e-45	93.7891850500188	DIS3	not-changed
NKTR	1.41147977729171	10.5263830734967	16.0122036507919	5.27530553706512e-46	9.74843583251787e-45	93.7655245100437	NKTR	up-regulated
TRPC4AP	-0.843616862199253	8.82744320712695	-16.0120219663088	5.28513253024799e-46	9.75765173464557e-45	93.7636728458432	TRPC4AP	not-changed
COG6	0.830221057864399	10.0278530066815	16.0083495319739	5.48773331947479e-46	1.01224328869104e-44	93.7262459156982	COG6	not-changed
IQSEC2	-1.13279375621396	7.22671937639198	-16.0024608954594	5.82890498204199e-46	1.07419152964304e-44	93.6662378545553	IQSEC2	not-changed
AKT2	-0.844046510240597	10.4833363028953	-16.0014203143289	5.89135843629621e-46	1.08470938296044e-44	93.6556344539248	AKT2	not-changed
ZSCAN22	-0.7406923841718	8.02344320712695	-15.9988992697376	6.04545003090339e-46	1.11206494592193e-44	93.6299460825973	ZSCAN22	not-changed
HNRNPA1	-0.843280811294495	12.6158374164811	-15.9987919242979	6.05209978750548e-46	1.11227332557792e-44	93.6288523027646	HNRNPA1	not-changed
AP2A1	-1.70564595346988	7.48795768374165	-15.9982068411444	6.08847266984447e-46	1.11793895716516e-44	93.6228907232452	AP2A1	down-regulated
RPL14	0.73051286538079	14.7943518930958	15.9976928683218	6.12060485556878e-46	1.12281632841785e-44	93.6176537563022	RPL14	not-changed
SERTAD3	-1.29131871147344	8.27810022271715	-15.9921033374143	6.48117072792604e-46	1.18788075496106e-44	93.5607039279276	SERTAD3	down-regulated
LOC100505918	-1.02273251143368	7.84313363028953	-15.9856978539868	6.92051826551227e-46	1.26725312217069e-44	93.4954473245389	LOC100505918	not-changed
KAT2A	-0.970231417776892	9.45126280623608	-15.9829516428065	7.11787030619491e-46	1.30220855937564e-44	93.46747217075	KAT2A	not-changed
MAP2K2	-0.999742056074778	11.6437082405345	-15.9762002549372	7.62726368202332e-46	1.39413656476221e-44	93.3987026063657	MAP2K2	not-changed
SPATA32	-1.68616323324716	8.52516258351893	-15.9719837226469	7.9637018817615e-46	1.45431334817204e-44	93.3557570943415	SPATA32	down-regulated
ASB16-AS1	-1.09990469278187	7.91393095768374	-15.9718660557079	7.97330007419181e-46	1.45474844159078e-44	93.3545586975227	ASB16-AS1	not-changed
ZNF419	-0.744255517995633	9.66914922048998	-15.9712599708685	8.02292218468055e-46	1.46247860908991e-44	93.3483859727663	ZNF419	not-changed
USP21	-0.863772022270835	9.4463986636971	-15.968259489244	8.27315980498218e-46	1.50673147992995e-44	93.3178282488573	USP21	not-changed
ZNF277	0.992208411214959	10.3955011135857	15.9671282989685	8.36950969681382e-46	1.52290329420093e-44	93.3063083075168	ZNF277	not-changed
RFPL3	-1.06384165838138	7.35952338530067	-15.9648864198023	8.56378594286331e-46	1.55684840752089e-44	93.283477871572	RFPL3	not-changed
BCAN	-1.43337935971366	7.65258351893096	-15.9578416978391	9.20405333129213e-46	1.67173801092055e-44	93.2117428664056	BCAN	down-regulated
MIR142	-2.59028101014117	10.2148084632517	-15.9561039044925	9.36920905039337e-46	1.70020363334816e-44	93.1940486012325	MIR142	down-regulated
TMSB4X	0.675782163452	15.6805345211581	15.9540558122715	9.5676569642509e-46	1.73465406525416e-44	93.1731955445385	TMSB4X	not-changed
LBX2-AS1	-1.68413153708491	7.42497772828508	-15.9518802350682	9.78305553032218e-46	1.77211305073518e-44	93.1510452818571	LBX2-AS1	down-regulated
NFS1	-0.719710618413211	9.56092427616927	-15.9488333984207	1.0092877043647e-45	1.82659330410203e-44	93.120025841331	NFS1	not-changed
MIA3	-0.778263909325913	9.82137861915368	-15.9458005814105	1.04110000029595e-45	1.88247687049028e-44	93.0891507555904	MIA3	not-changed
KRT7	-1.06098270033803	8.13763919821826	-15.9299886982925	1.22390370535603e-45	2.21103249136944e-44	92.9282067996377	KRT7	not-changed
NBPF1	-0.965977391131437	11.7055456570156	-15.9293769638853	1.23158646210808e-45	2.22291984445488e-44	92.9219810436972	NBPF1	not-changed
CYB561D1	-0.894600397693379	9.32445434298441	-15.929034890429	1.23590352317466e-45	2.22871654120968e-44	92.9184997155663	CYB561D1	not-changed
EDEM3	1.13856925830184	9.97365033407572	15.9262255007992	1.27193514999434e-45	2.29164294540089e-44	92.8899089581797	EDEM3	not-changed
TWF1	0.807251362099825	10.7470712694878	15.9261284649134	1.27319824001801e-45	2.29187051044671e-44	92.8889214627748	TWF1	not-changed
HAUS2	-1.04928252137601	10.1731603563474	-15.9230790523502	1.31353607215588e-45	2.36237294832601e-44	92.8578896601282	HAUS2	not-changed
ABCA2	-1.34895142175384	8.12923162583519	-15.9227148766228	1.31843791269621e-45	2.36907546861571e-44	92.8541838009458	ABCA2	down-regulated
ZFP92	-1.79375702923046	7.62583073496659	-15.9225888354034	1.3201386902577e-45	2.37001924615187e-44	92.8529012085548	ZFP92	down-regulated
RCCD1	-1.03893084112151	10.5316302895323	-15.9224781779224	1.32163368795798e-45	2.37059224047339e-44	92.8517751630333	RCCD1	not-changed
UBALD1	-1.45909618214357	8.04892650334076	-15.9117294774139	1.47520511943429e-45	2.64369870337019e-44	92.7424072242371	UBALD1	down-regulated
ENY2	0.910927719228468	12.3219487750557	15.9101712413079	1.49890022978338e-45	2.68377686790966e-44	92.7265538872144	ENY2	not-changed
SLC38A10	-0.957929727580035	10.4925812917595	-15.8998741898425	1.66532318675402e-45	2.97911098208942e-44	92.621803582023	SLC38A10	not-changed
CHCHD4	-0.742897772917086	10.094013363029	-15.8932117370337	1.78270699675837e-45	3.18627267390474e-44	92.5540375505082	CHCHD4	not-changed
RPS25	0.617854941340232	14.9950957683742	15.8920687912356	1.8036585843666e-45	3.22086454556378e-44	92.5424130632452	RPS25	not-changed
OTUD3	-1.45049725591569	7.79855679287305	-15.8906000966703	1.83094283539039e-45	3.26446204170867e-44	92.5274758458964	OTUD3	down-regulated
EIF2B4	-0.513069437263885	10.3323273942094	-15.8905804161081	1.83131122919126e-45	3.26446204170867e-44	92.5272756892409	EIF2B4	not-changed
WBP2	-1.21081091668322	9.8578841870824	-15.8885312695658	1.87007627436892e-45	3.33061906073779e-44	92.5064356918186	WBP2	down-regulated
FCHO1	-1.44087218134817	8.30903786191537	-15.8878789340544	1.88258801156335e-45	3.34994323928762e-44	92.4998015407709	FCHO1	down-regulated
NACA4P	-1.32335981308412	12.3832672605791	-15.8863854172836	1.91154911754158e-45	3.39847810923772e-44	92.4846129931787	NACA4P	down-regulated
CD164	0.751829190693961	13.1263541202673	15.8853812802996	1.93127017536136e-45	3.43051436171457e-44	92.4744014925516	CD164	not-changed
RAB1B	-0.83781819447206	10.7554409799555	-15.8802623123225	2.0350073929741e-45	3.61160070860482e-44	92.4223473112385	RAB1B	not-changed
RUSF1	-0.960615152117718	8.77617371937639	-15.8793241513135	2.05461400574735e-45	3.64319023481726e-44	92.4128077713889	RUSF1	not-changed
SPCS1	0.805134977132621	13.5213051224944	15.8780703786858	2.08111131138112e-45	3.68693191113839e-44	92.4000592315715	SPCS1	not-changed
MLLT1	-0.731151799562532	10.3273563474388	-15.8763775876813	2.11742889533243e-45	3.74797927645278e-44	92.3828471369405	MLLT1	not-changed
HSCB	0.985541061841321	10.3938084632517	15.874418090497	2.16025924811392e-45	3.82043742993199e-44	92.3629238476533	HSCB	not-changed
HSD17B12	0.948930264466092	12.2145634743875	15.8710638908337	2.2355916421019e-45	3.95019834324421e-44	92.3288214473357	HSD17B12	not-changed
C2orf76	1.04481652415988	9.4392004454343	15.8574510344543	2.56921323208951e-45	4.53571873661616e-44	92.1904392641763	C2orf76	not-changed
TMEM129	-0.931653131835349	8.4898285077951	-15.855435119637	2.62267604800362e-45	4.62605177636053e-44	92.169949214929	TMEM129	not-changed
FLJ45513	-1.71989900576656	6.82558574610245	-15.8525661358924	2.7006831046093e-45	4.75948182447798e-44	92.1407897130948	FLJ45513	down-regulated
STAG2	0.608063829787227	12.5417483296214	15.8500535379791	2.77090021386741e-45	4.87896237657474e-44	92.1152536308747	STAG2	not-changed
DGCR12	-1.76488791012129	5.8781135857461	-15.8482298321881	2.82300428237046e-45	4.96636905208297e-44	92.0967196236279	DGCR12	down-regulated
RPL39	0.721143467886273	15.8790267260579	15.8468894712939	2.86192153385935e-45	5.03044464203474e-44	92.0830981500558	RPL39	not-changed
KDM3B	-0.728749353748251	10.6004120267261	-15.8465278266426	2.87251329367713e-45	5.04466380782444e-44	92.0794229767693	KDM3B	not-changed
TPRA1	-0.733411175183935	8.66692204899777	-15.8432871703222	2.96918847814987e-45	5.20990503985898e-44	92.0464912243915	TPRA1	not-changed
HSPA13	0.938600855040763	10.2069977728285	15.8428997358177	2.9809616696898e-45	5.22601462805357e-44	92.0425542177467	HSPA13	not-changed
SELENOI	-0.830475064625192	9.16500890868597	-15.8354475394976	3.21670630897609e-45	5.63440624633075e-44	91.9668322609626	SELENOI	not-changed
FAM135B	-1.58522368264069	7.00684632516704	-15.8346851202307	3.24185033252796e-45	5.67351949254308e-44	91.9590858663352	FAM135B	down-regulated
MROH6	-1.76018281964605	7.20916035634744	-15.8338377262541	3.27002704977872e-45	5.71786776674665e-44	91.9504762282966	MROH6	down-regulated
RPS27	0.716822410021871	15.8624097995546	15.8316713521623	3.34317762872601e-45	5.84071093351344e-44	91.9284661646168	RPS27	not-changed
UBN1	-0.863452654603304	9.55885300668151	-15.8297556149805	3.40922490983789e-45	5.95094228634128e-44	91.9090032465853	UBN1	not-changed
EFHC1	-1.17497611851264	8.86018485523385	-15.8288428850721	3.44114890169529e-45	6.00147084836321e-44	91.8997306078464	EFHC1	not-changed
HDGF	-0.803189898588188	11.8584432071269	-15.8275735428687	3.48604259260346e-45	6.07451207514939e-44	91.8868353118776	HDGF	not-changed
DCAF8	-0.97859325909722	9.4829710467706	-15.8261726537892	3.53626779325789e-45	6.15670941104251e-44	91.8726039656726	DCAF8	not-changed
CCDC137	-0.859095486180157	9.54723608017817	-15.8186019327684	3.82046321395239e-45	6.64576003938689e-44	91.7957007260633	CCDC137	not-changed
DYNC1I2	0.522457466693156	12.1322917594655	15.8112575694693	4.11792936386046e-45	7.15703223317161e-44	91.7211067880812	DYNC1I2	not-changed
TRIM66	-1.1421573871545	8.28450334075724	-15.8094669128756	4.19389477158149e-45	7.28278316019417e-44	91.7029212520165	TRIM66	not-changed
CTNNB1	0.779592622787835	11.7855567928731	15.8064392735211	4.3255326470077e-45	7.50491081723944e-44	91.6721745063982	CTNNB1	not-changed
MUC5AC	-1.79621075760588	6.68618040089087	-15.8041633759459	4.42719429421259e-45	7.67469167374205e-44	91.6490630649743	MUC5AC	down-regulated
FAM118A	-1.41679077351361	8.56510690423163	-15.8022433030001	4.51481432874955e-45	7.81986011013056e-44	91.629565711501	FAM118A	down-regulated
RNASEH2B	-0.877221236826404	9.0236013363029	-15.7989837919482	4.66753966545787e-45	8.07744782792241e-44	91.5964685950255	RNASEH2B	not-changed
ADAM19	-1.19463865579638	10.4609665924276	-15.7893489466853	5.14980289873217e-45	8.90438904299651e-44	91.4986476170669	ADAM19	not-changed
LINC02064	-1.23438856631538	7.51909354120267	-15.7871057749911	5.26904031938897e-45	9.10275251749795e-44	91.4758755087934	LINC02064	down-regulated
COPZ1	-0.729872777888259	11.7407616926503	-15.7795029298462	5.69405428635963e-45	9.82858120439182e-44	91.3987002258293	COPZ1	not-changed
TIMELESS	-1.08339037582024	10.3683763919822	-15.7721027285004	6.14057941598007e-45	1.05902670321278e-43	91.3235921467583	TIMELESS	not-changed
LOC101928894	-1.38600399681845	7.63151224944321	-15.7703985288479	6.248265342251e-45	1.07667758602669e-43	91.3062968605256	LOC101928894	down-regulated
TMEM126A	0.931332073970976	11.9874610244989	15.7681734874723	6.39170489188518e-45	1.10045399082235e-43	91.2837165510023	TMEM126A	not-changed
FSCN3	-1.83840161065818	6.12588864142539	-15.7590630371164	7.01412068824001e-45	1.20658436173726e-43	91.1912708053001	FSCN3	down-regulated
C1GALT1	0.921739073374425	10.1423697104677	15.7545764937289	7.3425150133242e-45	1.26199868016734e-43	91.1457504919554	C1GALT1	not-changed
EIF3K	0.665230344004762	13.6065011135857	15.7491791055535	7.75797928332454e-45	1.33227104200261e-43	91.0909937104512	EIF3K	not-changed
PTP4A2	0.608771763770125	13.9669665924276	15.746192148135	7.99790350802494e-45	1.37230410744928e-43	91.0606931908373	PTP4A2	not-changed
TSNAX	0.793173374428308	11.3897572383074	15.7459266279527	8.01958628869844e-45	1.37485441468069e-43	91.0579997608721	TSNAX	not-changed
RELB	-0.890371465500095	9.90899331848552	-15.7411011207825	8.42402813605478e-45	1.44296373195412e-43	91.0090522155947	RELB	not-changed
LEMD2	-1.2820799164844	8.25322271714922	-15.730422072531	9.39293155504951e-45	1.60756275960402e-43	90.9007446234701	LEMD2	down-regulated
BSG	-0.994795287333458	10.1641425389755	-15.729256244017	9.50522275436389e-45	1.62540115310204e-43	90.8889219990107	BSG	not-changed
MMP25-AS1	-2.02042024259296	6.10485077951002	-15.7236433143639	1.00648964510223e-44	1.71964726567001e-43	90.8320050244558	MMP25-AS1	down-regulated
CLCN6	-1.31159325909722	8.1892583518931	-15.717341137662	1.07325877799002e-44	1.83217360059753e-43	90.7681058502477	CLCN6	down-regulated
TMEM263	1.07246504275204	11.1132249443207	15.716019458805	1.08781277496433e-44	1.85544783046159e-43	90.7547059933812	TMEM263	not-changed
GET1	0.813341459534701	10.87570155902	15.7141589696854	1.10863447471015e-44	1.88936429794009e-43	90.7358439547591	GET1	not-changed
HSPB6	-2.08011191091668	6.35744766146993	-15.7110093940896	1.14479378277257e-44	1.94934015662819e-43	90.7039143537489	HSPB6	down-regulated
DCT	-1.91250206800557	6.02769042316258	-15.7085235491644	1.17416235513742e-44	1.99766137062663e-43	90.6787147953198	DCT	down-regulated
LOC101929172	-1.86973823821833	5.48880846325167	-15.7069400022575	1.19326181508188e-44	2.0284444733445e-43	90.6626626334077	LOC101929172	down-regulated
SLC5A6	-0.958729409425333	9.30081291759466	-15.7037232632551	1.23301965288521e-44	2.09426362441607e-43	90.6300565086728	SLC5A6	not-changed
NDUFA10	-0.708557466693186	11.4216102449889	-15.6961741305474	1.33159478967966e-44	2.25978809383262e-43	90.5535431570742	NDUFA10	not-changed
CNPPD1	-0.685939888645857	10.5744454342984	-15.6946581977563	1.35231844320452e-44	2.29302709280457e-43	90.538179885667	CNPPD1	not-changed
TMEM70	0.94747327500497	11.9543073496659	15.6899581935549	1.41863884413498e-44	2.40346031400045e-43	90.4905502779325	TMEM70	not-changed
LRRFIP1	-0.805942075959443	12.6600378619154	-15.6866668186264	1.46700594001685e-44	2.48331710803356e-43	90.457198119029	LRRFIP1	not-changed
SLC23A2	-1.30977629747465	9.51859242761693	-15.6864017208394	1.47097247096582e-44	2.48794261637097e-43	90.4545119188585	SLC23A2	down-regulated
TM4SF1	1.33042431895008	10.0051380846325	15.6839323554515	1.50843857067402e-44	2.54917267588926e-43	90.4294908068627	TM4SF1	up-regulated
UBTF	-0.762559156890044	10.0046169265033	-15.6828433755576	1.52526219948317e-44	2.57544482443721e-43	90.4184569647042	UBTF	not-changed
ARAF	-0.792800795386746	9.91140757238307	-15.6818708339337	1.54044523910753e-44	2.59890514356878e-43	90.4086030955862	ARAF	not-changed
SERINC1	1.05045850069597	11.6953363028953	15.6745025518386	1.66048613660697e-44	2.7990853679041e-43	90.3339528619994	SERINC1	not-changed
ACLY	-0.70397560151123	12.3368663697105	-15.6741428967694	1.66657879320165e-44	2.80700877608508e-43	90.3303093525835	ACLY	not-changed
ERLEC1	0.836316365082515	11.7689198218263	15.6709476178272	1.72169696917783e-44	2.89742342200287e-43	90.2979404396607	ERLEC1	not-changed
STAT6	-0.880886518194465	12.4151224944321	-15.6687344945664	1.76093607497717e-44	2.96098683966761e-43	90.2755221198044	STAT6	not-changed
KCNAB2	-1.1014329488964	9.87358129175947	-15.6659702562349	1.81120267738412e-44	3.04297143156177e-43	90.2475224574639	KCNAB2	not-changed
SLC4A2	-1.72554977132631	8.03211804008909	-15.6655420491964	1.81911656068992e-44	3.05372264613401e-43	90.2431851702617	SLC4A2	down-regulated
ZC3H14	0.858468025452373	10.3859755011136	15.6567410283858	1.98963866750734e-44	3.33719677001793e-43	90.1540477607877	ZC3H14	not-changed
TMEM198B	-1.12792223105986	8.45139866369711	-15.6553151614508	2.0187293056102e-44	3.38317552206211e-43	90.1396078518289	TMEM198B	not-changed
TNK2	-1.43335364883675	8.855714922049	-15.6541495540748	2.04282522180152e-44	3.42071422730402e-43	90.1278039057575	TNK2	down-regulated
SH3BP1	-1.24472604891628	8.70277505567929	-15.6514058812069	2.1006828556335e-44	3.51467776368689e-43	90.1000201232821	SH3BP1	down-regulated
KLHL7	0.70532571087691	10.1744877505568	15.6459884918336	2.21977006609546e-44	3.71084446953155e-43	90.0451651639032	KLHL7	not-changed
ZNF839	-1.10198274010737	8.09562138084632	-15.6420879674988	2.30966360162033e-44	3.85792277317875e-43	90.0056730030952	ZNF839	not-changed
XDH	-1.10369280174985	7.6174276169265	-15.6416551419902	2.31986006884051e-44	3.87174659336868e-43	90.0012908949316	XDH	not-changed
SPINDOC	-1.30931099622191	7.79198440979955	-15.6409313796758	2.33701088741938e-44	3.89714445833434e-43	89.9939632992927	SPINDOC	down-regulated
GET3	-0.859547126665332	10.083561247216	-15.635795022107	2.46241710211164e-44	4.1028753054275e-43	89.9419640740009	GET3	not-changed
RBM15B	-0.701448876516203	9.3913429844098	-15.6318096381677	2.56433124495175e-44	4.26915625346591e-43	89.901620483548	RBM15B	not-changed
RPUSD1	-0.738369755418576	8.52493318485523	-15.6308857850814	2.5885508414193e-44	4.3059219070837e-43	89.8922688553415	RPUSD1	not-changed
RHOT1	0.663371028037391	10.6885723830735	15.6233140711766	2.79585109824439e-44	4.64692118645549e-43	89.8156309265658	RHOT1	not-changed
TBCD	-1.11857796778683	9.38750334075724	-15.6217462240401	2.84080446105869e-44	4.71434731108362e-43	89.7997631580328	TBCD	not-changed
RPF1	0.726778047325526	12.2195122494432	15.6217361655464	2.84109517532196e-44	4.71434731108362e-43	89.7996613601796	RPF1	not-changed
TOR1AIP1	0.846066613640881	11.8605456570156	15.6214058154315	2.85065959669616e-44	4.72632797113415e-43	89.7963180340658	TOR1AIP1	not-changed
NOMO3	-1.70934497912111	7.90907126948775	-15.6151603974811	3.03764946091106e-44	5.03221452600065e-43	89.7331148702684	NOMO3	down-regulated
TNRC6A	-0.723815728773118	10.1223251670379	-15.6131987961829	3.09887003873397e-44	5.12941862486992e-43	89.7132651509767	TNRC6A	not-changed
NAA35	1.11092288725393	9.24936302895323	15.6112488790795	3.16094646807873e-44	5.22787873198813e-43	89.6935343956747	NAA35	not-changed
SRGAP2C	1.19575199840922	8.78886191536748	15.6104047202017	3.18820416164371e-44	5.26863804122122e-43	89.6849927751736	SRGAP2C	not-changed
NDUFB6	0.920448956054885	12.4479888641425	15.606013355829	3.33383094243067e-44	5.50478014990539e-43	89.6405609630825	NDUFB6	not-changed
TKFC	-0.992584907536287	8.11738752783964	-15.6044693140887	3.38659691071065e-44	5.58733063149242e-43	89.6249392316504	TKFC	not-changed
ATP1A1	-0.769630145158089	11.5765233853007	-15.5989781797035	3.58109559289789e-44	5.90339069897092e-43	89.5693867801932	ATP1A1	not-changed
TRIM28	-0.896632133624976	12.2371625835189	-15.5940575227621	3.7648407918773e-44	6.20122183047697e-43	89.5196106284463	TRIM28	not-changed
ELOC	0.900840524955255	12.6922048997773	15.5933340159262	3.79263992328428e-44	6.24191130557831e-43	89.5122922043014	ELOC	not-changed
ATG2A	-0.697004493935175	9.4559420935412	-15.5891803358783	3.95624679642836e-44	6.50072371423291e-43	89.4702788039354	ATG2A	not-changed
DOHH	-0.965683038377414	8.39020935412027	-15.5891778841263	3.95634541806645e-44	6.50072371423291e-43	89.4702540060782	DOHH	not-changed
NDUFB5	0.859878166633525	13.0737795100223	15.5846767154693	4.14160611736074e-44	6.79958639512295e-43	89.4247296008165	NDUFB5	not-changed
PIK3R1	0.873602624776307	10.5992271714922	15.5781919477879	4.42383464716599e-44	7.25703257294659e-43	89.3591501246624	PIK3R1	not-changed
GLT8D1	0.800987035195861	10.6733919821826	15.5777335351347	4.44449717938436e-44	7.28500062061529e-43	89.3545145738151	GLT8D1	not-changed
GPN3	0.900418433088108	10.7996547884187	15.5746816067763	4.58453725435929e-44	7.50843668441411e-43	89.3236539621265	GPN3	not-changed
CAPN1	-1.12971893020481	9.36989977728285	-15.5742060337319	4.60675244293418e-44	7.53869610405811e-43	89.3188452055607	CAPN1	not-changed
PPP2R3C	0.748986657387158	11.2660801781737	15.5694617330821	4.83433876678507e-44	7.90471239879593e-43	89.2708756058448	PPP2R3C	not-changed
SEZ6L	-1.86236337243985	5.943714922049	-15.5637672934475	5.12236957862237e-44	8.36888922808797e-43	89.2133049060961	SEZ6L	down-regulated
POGZ	-0.95953811891032	9.99885300668151	-15.5625600718362	5.18559909255241e-44	8.46533306112949e-43	89.2011007203845	POGZ	not-changed
MRS2	1.06380594551601	10.1864766146993	15.5592944943073	5.36056834742137e-44	8.7438849880552e-43	89.1680893780998	MRS2	not-changed
LINC01741	-1.59247200238616	7.18052783964365	-15.5519779194116	5.77427810837405e-44	9.4110930430824e-43	89.0941344863379	LINC01741	down-regulated
GGTLC1	-0.940473414197661	8.42236080178174	-15.551863089671	5.78101886600153e-44	9.41446860722592e-43	89.092973886603	GGTLC1	not-changed
CBFA2T2	-1.34751240803341	9.6320579064588	-15.5446602970556	6.21991892864276e-44	1.01210480645978e-42	89.0201794096038	CBFA2T2	down-regulated
RNF214	-0.765708749254323	8.6794008908686	-15.5428607922365	6.33466814475745e-44	1.02922991152761e-42	89.0019944264552	RNF214	not-changed
FKBP4	-0.982383615032804	10.4595389755011	-15.542849857243	6.33537185757532e-44	1.02922991152761e-42	89.0018839242753	FKBP4	not-changed
PI4KB	-0.587058997812678	10.9021692650334	-15.5407515869746	6.47185860902851e-44	1.05055669417571e-42	88.9806805531168	PI4KB	not-changed
GOLM2	0.776440882879303	11.6386035634744	15.5379446384453	6.65904303886823e-44	1.08007213762367e-42	88.9523172111039	GOLM2	not-changed
PDLIM7	-1.35968335653211	8.25761024498886	-15.5364241444055	6.76268530431038e-44	1.09600079115918e-42	88.936953732935	PDLIM7	down-regulated
SOGA1	-1.52853754225493	8.47257015590201	-15.5359324687382	6.79654295946005e-44	1.10060323378051e-42	88.9319858070388	SOGA1	down-regulated
GTF3C1	-0.743723583217344	10.2441091314031	-15.5343015485109	6.91006709666581e-44	1.11808878600224e-42	88.9155072107358	GTF3C1	not-changed
ABHD16A	-0.794779797176359	9.75010690423163	-15.5310537264659	7.14180785201612e-44	1.15465908664392e-42	88.8826932042444	ABHD16A	not-changed
MED12	-0.95165291310399	9.26791759465479	-15.5298776478229	7.22762377469747e-44	1.16759713879548e-42	88.8708113332026	MED12	not-changed
SLC13A5	-1.99785555776497	6.13378841870824	-15.5261013921628	7.5101884533779e-44	1.21227309374341e-42	88.8326618143502	SLC13A5	down-regulated
ELMOD3	-1.72221970570689	7.27121158129176	-15.5246736784537	7.61986893255911e-44	1.22899342039459e-42	88.8182391020255	ELMOD3	down-regulated
CCDC13	-1.40695424537682	7.23674832962138	-15.5194056703977	8.03858476113499e-44	1.29549086626093e-42	88.7650253250817	CCDC13	down-regulated
NAT10	-0.93063978922252	11.0042093541203	-15.5183497664651	8.12523419811437e-44	1.3082038566841e-42	88.7543599667802	NAT10	not-changed
LINC01648	-1.50510616424736	7.0113719376392	-15.518286601766	8.13044706326661e-44	1.3082038566841e-42	88.753721966657	LINC01648	down-regulated
ADM5	-2.0600729369656	6.61206236080178	-15.516229697588	8.30203613010413e-44	1.33474761099704e-42	88.7329464677172	ADM5	down-regulated
MAFK	-0.833645237621782	9.91414476614699	-15.509386780361	8.89931986031465e-44	1.4296349617833e-42	88.6638364223772	MAFK	not-changed
PSME1	0.749205209783261	13.3703162583519	15.5082683378639	9.00094163486917e-44	1.44480879220221e-42	88.652541585416	PSME1	not-changed
NCL	-0.813041618612038	13.5437349665924	-15.4976219939038	1.00281681654982e-43	1.6084160571568e-42	88.5450394502519	NCL	not-changed
PFKL	-1.04360763571287	10.2426948775056	-15.4955277926224	1.02436003018458e-43	1.6416631612521e-42	88.5238957438283	PFKL	not-changed
COL9A2	-1.52752229071385	8.8328285077951	-15.4941701536744	1.03857234597565e-43	1.66311811494957e-42	88.5101890608754	COL9A2	down-regulated
SFI1	-0.938721435673092	9.73190645879733	-15.4933503457316	1.04724955841789e-43	1.67568240851294e-42	88.501912479786	SFI1	not-changed
KMT2A	-0.888762656591773	10.3127260579065	-15.4920683748991	1.06096378207342e-43	1.69628000082333e-42	88.4889702803224	KMT2A	not-changed
SLC38A5	-2.0083609663949	7.84096436525612	-15.4844275971663	1.14650227982469e-43	1.8315873584426e-42	88.4118391560268	SLC38A5	down-regulated
TOX4	-0.553636329290116	10.3813585746102	-15.4815727588623	1.1801996265916e-43	1.88392752745157e-42	88.3830234646952	TOX4	not-changed
RNF207	-1.25571982501491	8.04312249443207	-15.4767989850637	1.23877018874631e-43	1.97585805184449e-42	88.3348423404756	RNF207	down-regulated
SS18L2	0.865001511234837	12.2143830734967	15.4758530522088	1.25071597727366e-43	1.99333476820666e-42	88.3252956890538	SS18L2	not-changed
RHBDF2	-1.11239522767947	9.92540757238307	-15.4755556061721	1.25449600751308e-43	1.99777993739899e-42	88.3222938068327	RHBDF2	not-changed
DGCR2	-0.726007357327504	9.89080400890869	-15.4751544370142	1.25961224776559e-43	2.00434431943189e-42	88.3182451587895	DGCR2	not-changed
BTF3	0.597035315171997	14.6747728285078	15.4695600023039	1.3331686434646e-43	2.11971711521213e-42	88.261788762139	BTF3	not-changed
KLHL17	-1.48956265659177	7.15017594654788	-15.4679204087777	1.35552765768331e-43	2.1535691967339e-42	88.2452439323869	KLHL17	down-regulated
TMEM251	0.870672598926236	10.6944008908686	15.4637091447316	1.4146865484854e-43	2.24578704756017e-42	88.2027513021571	TMEM251	not-changed
ZNF385A	-1.04414438258103	9.25906458797327	-15.461584698758	1.44550119026966e-43	2.29289925232311e-42	88.1813164852175	ZNF385A	not-changed
ZDHHC23	-1.12301407834559	8.71504008908686	-15.4612775642623	1.45001119688279e-43	2.29824494814102e-42	88.1782176941484	ZDHHC23	not-changed
AK8	-1.34201779677869	7.52909799554566	-15.4590858531417	1.48260489747931e-43	2.34805949238651e-42	88.1561052713561	AK8	down-regulated
SORBS1	-0.814043567309595	9.95390423162583	-15.4569488135994	1.51508951754779e-43	2.39762321532819e-42	88.1345453552214	SORBS1	not-changed
LXN	1.23329580433485	10.1797260579065	15.4534442885131	1.56990574735027e-43	2.48242115861403e-42	88.0991912749835	LXN	up-regulated
NUMBL	-1.09210572678465	10.3864565701559	-15.4507382505819	1.61358297451572e-43	2.54948639100403e-42	88.0718941029181	NUMBL	not-changed
FKBP1A	-0.820272459733543	12.6358886414254	-15.4447775743711	1.71411774432725e-43	2.70621204724994e-42	88.0117708928192	FKBP1A	not-changed
H3C2	2.54083897395109	7.37726503340757	15.440856686869	1.7836334924988e-43	2.81375859485667e-42	87.9722261633125	H3C2	up-regulated
FGF4	-1.32692841519188	7.09343875278396	-15.4343918729154	1.9044495387077e-43	3.00200212274323e-42	87.9070309618855	FGF4	down-regulated
RTRAF	0.587740982302641	13.8400579064588	15.4341363880828	1.909388345978e-43	3.00743581587988e-42	87.9044546655316	RTRAF	not-changed
ANO9	-1.73290198846689	8.60064365256125	-15.430636170729	1.97835289804028e-43	3.11362785147463e-42	87.8691599616104	ANO9	down-regulated
JMJD1C	0.819162219129041	10.8124587973274	15.4270841169882	2.05088067715716e-43	3.22355281566021e-42	87.8333450667776	JMJD1C	not-changed
NPLOC4	-0.81519832968781	10.3176815144766	-15.4270593591387	2.05139539828979e-43	3.22355281566021e-42	87.8330954454696	NPLOC4	not-changed
LEPR	-1.31539276198051	7.02520489977728	-15.423926558411	2.11757837396572e-43	3.32496087208122e-42	87.8015099357165	LEPR	down-regulated
TBC1D9B	-0.805281069795193	10.69985077951	-15.4124601536119	2.37851388825459e-43	3.73176797673936e-42	87.6859201784556	TBC1D9B	not-changed
SLC30A1	1.31460564724597	10.4726369710468	15.4108447782029	2.41776680183951e-43	3.79040408179521e-42	87.6696381322094	SLC30A1	up-regulated
RAB11FIP3	-0.881301212964805	8.86722271714922	-15.4103133899285	2.43082010798333e-43	3.80790708601802e-42	87.6642821615347	RAB11FIP3	not-changed
PIM3	-0.762172698349577	11.2231202672606	-15.4075078893502	2.50091086401152e-43	3.91466334855096e-42	87.6360058905768	PIM3	not-changed
LZIC	0.982294511831373	9.35860579064588	15.4033856570641	2.6075734739291e-43	4.07845529929283e-42	87.5944613260639	LZIC	not-changed
C1GALT1C1	0.789372161463518	10.4162093541203	15.4003184838867	2.6898716172412e-43	4.20391485854263e-42	87.5635520477085	C1GALT1C1	not-changed
PCSK7	-1.06018309803141	9.47345434298441	-15.3991883202451	2.72084536489946e-43	4.24716660600469e-42	87.5521633600707	PCSK7	not-changed
SVBP	0.818855557764961	9.77828285077951	15.3991551621946	2.72175946379548e-43	4.24716660600469e-42	87.5518292294415	SVBP	not-changed
SLC30A9	0.551172221117515	10.8865946547884	15.3969767296694	2.78249077160504e-43	4.33857667798369e-42	87.5298778505306	SLC30A9	not-changed
FRG1BP	-1.14071342215152	8.32266815144766	-15.3959538532298	2.81147175899577e-43	4.3803772900397e-42	87.5195709766603	FRG1BP	not-changed
KIAA0100	-0.894416941737918	10.4430779510022	-15.3830503143131	3.20400481225051e-43	4.98810355365116e-42	87.3895683765598	KIAA0100	not-changed
LYG1	-2.19487900178962	6.69693095768374	-15.378353490281	3.36008089875682e-43	5.22705177467872e-42	87.342256431666	LYG1	down-regulated
CYTOR	-1.70447078942136	7.50668374164811	-15.376155316752	3.43571093221531e-43	5.3405835084343e-42	87.3201153725648	CYTOR	down-regulated
ABCF3	-0.652801113541456	8.97032071269488	-15.3705874160899	3.63496835754751e-43	5.64596279326005e-42	87.2640371856462	ABCF3	not-changed
GLOD4	-0.605968960031824	10.5091692650334	-15.3675991410339	3.74662322486111e-43	5.8149092252829e-42	87.2339427893	GLOD4	not-changed
RPS6KA4	-1.1438026844303	8.94347661469933	-15.3657240797128	3.81842471260467e-43	5.92178927929405e-42	87.215060299697	RPS6KA4	not-changed
SLC27A4	-1.12088333664744	8.20186414253897	-15.3632576455223	3.91496701549999e-43	6.06684473478057e-42	87.1902235765839	SLC27A4	not-changed
TBCB	-0.739261324318944	11.6139465478842	-15.3631092283577	3.92085352661022e-43	6.06752323032808e-42	87.188729071362	TBCB	not-changed
RALGAPB	-0.664086637502491	9.86322271714922	-15.3630948587452	3.92142392198675e-43	6.06752323032808e-42	87.1885843749877	RALGAPB	not-changed
ANKZF1	-1.15193774110161	9.02808017817372	-15.3626000341014	3.94111637630122e-43	6.09331650786878e-42	87.183601710071	ANKZF1	not-changed
PHF7	-0.99430775502088	7.52496213808463	-15.3591608963817	4.08073715932669e-43	6.3043480359529e-42	87.1489724923316	PHF7	not-changed
MCRS1	-0.700254603300857	9.60608240534521	-15.35755589158	4.1475754757487e-43	6.40270054874193e-42	87.1328122702708	MCRS1	not-changed
FBRSL1	-1.0761723603102	10.0325144766147	-15.3571538520288	4.16448830806136e-43	6.423890495702e-42	87.1287643592261	FBRSL1	not-changed
CWC15	0.720636707098834	12.4057639198218	15.3560294780946	4.21215431732232e-43	6.49244978528557e-42	87.1174438425392	CWC15	not-changed
POLG	-0.818443368462914	9.90259020044543	-15.3551636142184	4.24923199453375e-43	6.54459635155042e-42	87.1087262540703	POLG	not-changed
TRRAP	-0.938850109365683	10.6928195991091	-15.3525425798406	4.36346605225062e-43	6.71540756331486e-42	87.0823383957066	TRRAP	not-changed
ZNF767P	-1.14245195863989	8.99321826280624	-15.3508373592059	4.43942617785894e-43	6.82709925032908e-42	87.0651714514739	ZNF767P	not-changed
RNFT1	1.05304432292704	9.90006236080178	15.3507603043072	4.44288963045484e-43	6.82721782314025e-42	87.064395731746	RNFT1	not-changed
G6PD	-1.17730680055677	9.57018040089087	-15.3500498858576	4.47494873347399e-43	6.8712445861058e-42	87.0572439318963	G6PD	not-changed
LRRC57	0.841460946510248	9.43803563474387	15.3461390623505	4.65561140442681e-43	7.14321016169321e-42	87.0178754189202	LRRC57	not-changed
TGFB1	-1.03018387353351	10.7244587973274	-15.3398555432576	4.9612480187725e-43	7.60636663927547e-42	86.9546285759303	TGFB1	not-changed
ZNF675	0.993866235832179	7.84866146993318	15.3386641662107	5.02141713386051e-43	7.69276526107612e-42	86.9426376643291	ZNF675	not-changed
LMNB2	-1.23170686021078	9.41393763919822	-15.3376375843202	5.07384726571232e-43	7.767185628248e-42	86.9323056074067	LMNB2	down-regulated
GALNT7	0.81247134619208	10.7248485523385	15.334315891072	5.24726759320224e-43	8.02656767424509e-42	86.8988758264934	GALNT7	not-changed
LETMD1	-0.742748995824217	11.0500289532294	-15.3288236153323	5.5470828295136e-43	8.4787518518441e-42	86.8436060867678	LETMD1	not-changed
PSMB4	0.619495426526145	13.8594521158129	15.3267012054947	5.66746940729083e-43	8.65620081215079e-42	86.8222495572348	PSMB4	not-changed
GOLGB1	-0.869898488765152	10.5059042316258	-15.3258931235139	5.71398748006779e-43	8.72064357196417e-42	86.8141185585349	GOLGB1	not-changed
TPCN2	-1.01200789421357	8.9730579064588	-15.3234609480999	5.85631022525283e-43	8.93109458784587e-42	86.7896465832769	TPCN2	not-changed
CCDC82	-0.783551381984495	9.84578619153675	-15.322297545143	5.92563417522257e-43	9.02998568455497e-42	86.7779411261777	CCDC82	not-changed
ACOX1	0.84472585006959	9.31819599109131	15.3200568499954	6.0614670052834e-43	9.23000274120232e-42	86.7553973890446	ACOX1	not-changed
CYCS	0.851725372837549	13.8288129175947	15.3183440055117	6.16739292807928e-43	9.38421198664199e-42	86.7381650768466	CYCS	not-changed
SPAAR	-1.20398820839132	7.69147216035635	-15.3148234228341	6.3909495022906e-43	9.71703868142388e-42	86.702747653245	SPAAR	down-regulated
CER1	-1.54802469675879	6.45522271714922	-15.3146752233926	6.40053551389939e-43	9.72428006750005e-42	86.7012568074946	CER1	down-regulated
ARV1	0.725120322131636	10.4875434298441	15.3035947621877	7.15943475077141e-43	1.08690786152336e-41	86.5898032039537	ARV1	not-changed
USP5	-1.46932314575463	7.82712026726058	-15.3011959800576	7.33520270018972e-43	1.1127541131567e-41	86.5656782135873	USP5	down-regulated
FBXO10	-0.983031974547616	9.04328953229399	-15.2978130664904	7.59042507182354e-43	1.15060571333109e-41	86.5316576501682	FBXO10	not-changed
HMGA1	-1.09005704911513	12.6507861915367	-15.2972194780662	7.63611342413713e-43	1.15666177869293e-41	86.5256884202444	HMGA1	not-changed
PDCD10	0.932340942533298	13.0032227171492	15.2917855905673	8.06732462266022e-43	1.22106104892982e-41	86.4710476700615	PDCD10	not-changed
ZC3H18	-0.849592443825808	9.76822494432071	-15.285209123964	8.62183339350669e-43	1.30401187581762e-41	86.4049258158938	ZC3H18	not-changed
SLAMF6	-1.43804523762179	9.83347884187082	-15.283634436216	8.76015508169386e-43	1.32393917992526e-41	86.3890947400558	SLAMF6	down-regulated
VAT1	-1.05643754225492	10.2719799554566	-15.2828418015339	8.83061640504832e-43	1.33358844451071e-41	86.3811262054	VAT1	not-changed
NUP214	-0.659293835752637	9.54644320712695	-15.2820135044213	8.90485236563206e-43	1.34379287831967e-41	86.3727992873309	NUP214	not-changed
DCAF1	-0.735787413004575	10.3749554565702	-15.2812121137409	8.97726958829924e-43	1.35370779483696e-41	86.3647429964119	DCAF1	not-changed
WDR45B	-0.582217776894021	10.9736681514477	-15.2809293411634	9.00296221000747e-43	1.35656742239133e-41	86.3619003470566	WDR45B	not-changed
EXOC3	-0.785295665142177	9.76446547884187	-15.2800334628053	9.0848469574669e-43	1.36788349148238e-41	86.3528943920678	EXOC3	not-changed
HERC1	-0.757091827401071	10.4546993318486	-15.2777499493341	9.2969412942103e-43	1.39877338382518e-41	86.3299397739869	HERC1	not-changed
TMEM223	0.83844782262875	10.4353229398664	15.2730384788414	9.75029021331587e-43	1.46588815056422e-41	86.2825819615197	TMEM223	not-changed
AGPAT2	-0.836176178166626	9.15314699331848	-15.2727014899136	9.78354903867391e-43	1.46979234104847e-41	86.279194860421	AGPAT2	not-changed
KRTAP4-8	-1.08964595346988	7.21155233853007	-15.2720823531857	9.84494956762577e-43	1.47791532563591e-41	86.2729719319684	KRTAP4-8	not-changed
VPS9D1	-1.39799194670909	7.63220712694878	-15.2697929739785	1.00753489411597e-42	1.51137730656787e-41	86.2499621275589	VPS9D1	down-regulated
MYO19	-0.80488808908332	9.60451893095768	-15.2686996395031	1.01872711896323e-42	1.5270302933396e-41	86.2389737630878	MYO19	not-changed
PNKP	-0.746311811493335	9.70754788418708	-15.2654594246217	1.05263051719701e-42	1.57667784971834e-41	86.2064100163386	PNKP	not-changed
TRIM41	-0.829667766951673	9.65804899777283	-15.2645334007826	1.06252506795454e-42	1.59031684447153e-41	86.1971039957503	TRIM41	not-changed
ATG4B	-0.592951362099813	10.3462672605791	-15.2622666898005	1.08713828107811e-42	1.62594917543144e-41	86.1743255733835	ATG4B	not-changed
CEP85	-0.945564704712666	8.48990868596882	-15.2614327974856	1.09633562505458e-42	1.63848943934214e-41	86.1659459688247	CEP85	not-changed
OR5P2	-1.85041668323722	5.86153229398664	-15.2573473612719	1.14253011342678e-42	1.70626293457757e-41	86.1248943906815	OR5P2	down-regulated
KDM6B	-0.9503017896202	9.75242538975501	-15.2549747968423	1.17024334246226e-42	1.7463564787107e-41	86.1010558114308	KDM6B	not-changed
GAK	-0.764596460528935	11.4215991091314	-15.250676722436	1.22216742213636e-42	1.82249389036178e-41	86.0578734658065	GAK	not-changed
KLF9	1.44289759395506	8.46347216035635	15.2490682329301	1.24218505522671e-42	1.85097508487995e-41	86.0417141152978	KLF9	up-regulated
SLC4A8	-1.36245903758202	8.07052561247216	-15.2473192687751	1.26432237187435e-42	1.88257040911069e-41	86.024144128664	SLC4A8	down-regulated
PRPS2	0.803945973354539	11.3377171492205	15.2455851275217	1.28666076369618e-42	1.91441827726041e-41	86.0067236825882	PRPS2	not-changed
APOBEC4	-1.6162135613442	6.44636971046771	-15.2445077073771	1.30073751995656e-42	1.93393577727465e-41	85.9959006940493	APOBEC4	down-regulated
PLCXD1	-1.1653898190495	9.86996659242762	-15.2330936667804	1.45963997372007e-42	2.16859259470673e-41	85.8812583511075	PLCXD1	not-changed
ACAD8	-0.840236130443435	9.1267438752784	-15.2302239212011	1.50255068761693e-42	2.23070135589433e-41	85.8524389878489	ACAD8	not-changed
CSNK1G2-AS1	-1.56826490355937	6.87993763919822	-15.2287547679776	1.52500353852094e-42	2.26236911995001e-41	85.8376857137058	CSNK1G2-AS1	down-regulated
ZNRF2	1.09822724199643	9.41569933184855	15.2245798258195	1.59065298665059e-42	2.35802609293106e-41	85.7957633092325	ZNRF2	not-changed
UQCRB	0.631424279180759	14.1705077951002	15.2057031128838	1.92450403836067e-42	2.85083952368769e-41	85.606259769563	UQCRB	not-changed
NOS1	-1.39863318751243	7.13327171492205	-15.2042453281132	1.95302356027305e-42	2.89096240812518e-41	85.5916281718589	NOS1	down-regulated
KCNN4	-1.38316919864784	10.0030846325167	-15.1996773745985	2.04514933784502e-42	3.02511047691075e-41	85.5457831147182	KCNN4	down-regulated
ABL1	-0.94439930403659	10.0626258351893	-15.1988569948353	2.06214817799651e-42	3.04801828567357e-41	85.5375500566993	ABL1	not-changed
TMEM167A	0.887053111950673	12.261276169265	15.194948423673	2.14509287382772e-42	3.16829431716049e-41	85.4983268903855	TMEM167A	not-changed
OR2H2	-1.63296567906144	6.38000668151448	-15.1918814003341	2.21250338438123e-42	3.26546711072547e-41	85.4675510580277	OR2H2	down-regulated
BCL9	-1.05849385563731	7.82214031180401	-15.1856861947081	2.35518482096266e-42	3.47350996162606e-41	85.4053917673141	BCL9	not-changed
USP16	0.539428534499891	11.6816570155902	15.1853903909598	2.36222257658164e-42	3.48134278994609e-41	85.4024240381983	USP16	not-changed
OR2H1	-1.9292081924836	5.35253229398664	-15.1847131045807	2.37841569694552e-42	3.50264710490275e-41	85.3956290537811	OR2H1	down-regulated
BCAS2	0.731682521376021	11.7240668151448	15.1846334734421	2.38032684697508e-42	3.50290288772734e-41	85.3948301479726	BCAS2	not-changed
RNF44	-0.933544621197051	11.0533184855234	-15.1802009951837	2.48915888413221e-42	3.66038893238435e-41	85.3503630721245	RNF44	not-changed
EIF5B	1.29630980314178	11.2515211581292	15.1797838084604	2.49965442059e-42	3.67314378815707e-41	85.3461780266414	EIF5B	up-regulated
HOTTIP	-0.960631059852858	9.09552783964365	-15.1792252698248	2.51377524839873e-42	3.69120340735373e-41	85.3405750547488	HOTTIP	not-changed
PGM5-AS1	-1.17918065221713	8.41304899777283	-15.1766710814035	2.57937076953487e-42	3.78476667282333e-41	85.3149535954466	PGM5-AS1	not-changed
SEPTIN10	1.24238301849274	9.64023162583519	15.1764142470431	2.58606045880821e-42	3.79182290254781e-41	85.3123773268305	SEPTIN10	up-regulated
KANSL3	-0.775877669516802	10.6002138084633	-15.1747001422795	2.63115279482784e-42	3.8551360099218e-41	85.2951837464645	KANSL3	not-changed
C2CD3	-0.878287413004577	9.39103786191537	-15.1737300436083	2.65701964540954e-42	3.89020864713884e-41	85.2854533052453	C2CD3	not-changed
DTNBP1	-0.772299781268638	11.1163318485523	-15.1704119925955	2.74742619098213e-42	4.01965598232154e-41	85.2521735622995	DTNBP1	not-changed
MOB2	-0.740443865579634	8.77580846325167	-15.1679143105621	2.81749964043127e-42	4.11918856060441e-41	85.2271235874069	MOB2	not-changed
KLC4	-0.897117339431297	9.02722494432071	-15.1676438787693	2.82519291604817e-42	4.1274430710469e-41	85.2244114283902	KLC4	not-changed
RPL30	0.660056631537088	15.7852650334076	15.1642511013403	2.92351110034379e-42	4.26798749413694e-41	85.1903866034102	RPL30	not-changed
AP2A2	-0.679486219924422	10.7952873051225	-15.1614000701201	3.00876536594858e-42	4.38927051685162e-41	85.1617966314936	AP2A2	not-changed
IFT122	-0.842487751043946	7.95724944320713	-15.1563648587483	3.16543771934942e-42	4.6144895054088e-41	85.1113080597687	IFT122	not-changed
OGA	-0.889743428116901	11.6226926503341	-15.1547268185817	3.21814075886574e-42	4.68792889013671e-41	85.0948844310335	OGA	not-changed
CCDC157	-1.4344009544641	6.62530512249443	-15.1540095866686	3.24149209099347e-42	4.71853588783533e-41	85.0876933646534	CCDC157	down-regulated
CNOT11	-0.622241002187305	10.8462605790646	-15.1525955473279	3.28802623619998e-42	4.78282084762106e-41	85.0735163320903	CNOT11	not-changed
MLST8	-0.755299900576661	9.10600445434298	-15.1503654382428	3.36277460172747e-42	4.8880244228859e-41	85.0511583241065	MLST8	not-changed
CC2D1B	-1.1851876516206	8.65230512249443	-15.1496910711256	3.38571007717932e-42	4.91781706527466e-41	85.0443976507241	CC2D1B	not-changed
PPME1	-0.679296579836938	10.1140244988864	-15.1481360454372	3.43919383004918e-42	4.99190689759694e-41	85.0288085585592	PPME1	not-changed
TAB1	-1.35593004573474	7.36307572383074	-15.1466848463007	3.48986683358245e-42	5.06181332603279e-41	85.0142607908493	TAB1	down-regulated
CCDC91	0.73439928415192	10.2250467706013	15.1463799876831	3.50060622681781e-42	5.07373990933673e-41	85.0112047462028	CCDC91	not-changed
PIK3R6	-1.35887281765758	7.17449443207127	-15.1456415960263	3.52675476097556e-42	5.10796715057674e-41	85.003802846944	PIK3R6	down-regulated
SPDYE2	-1.6258600119308	7.54870824053452	-15.1446509750139	3.56214186554387e-42	5.15551630662096e-41	84.9938726944199	SPDYE2	down-regulated
ZNF592	-0.669826804533704	9.48032516703786	-15.1426544600117	3.63454197801893e-42	5.25652803578477e-41	84.9738599280215	ZNF592	not-changed
RALB	-1.12572925034799	9.84212472160356	-15.1411433261926	3.69031531810374e-42	5.33336538554046e-41	84.9587131165082	RALB	not-changed
RPRD2	-0.787370868960029	10.4252338530067	-15.1404982255302	3.71438423532639e-42	5.36430519831056e-41	84.9522471151781	RPRD2	not-changed
NXF1	-0.81148693577253	10.8697951002227	-15.1353054014209	3.9139239583151e-42	5.64843385279819e-41	84.9002014169387	NXF1	not-changed
EBAG9	0.659086458540466	11.6012494432071	15.126451259513	4.27912920505189e-42	6.17106751810094e-41	84.8114730519391	EBAG9	not-changed
INTS9	-0.773220282362308	9.73860801781737	-15.1260234824601	4.29761037080815e-42	6.19328968447914e-41	84.8071866752754	INTS9	not-changed
FBXW9	-0.814598289918481	8.39284409799555	-15.1237212670261	4.39844898270505e-42	6.33408071002261e-41	84.7841188791381	FBXW9	not-changed
SCYL3	0.821371445615425	9.49988195991091	15.1215320039153	4.49652947181311e-42	6.47070169030864e-41	84.7621839016528	SCYL3	not-changed
IRAK1BP1	1.31569727580036	7.73623385300668	15.1204187547165	4.54723782434063e-42	6.53900583284818e-41	84.7510302714064	IRAK1BP1	up-regulated
ATG13	-0.642833147743096	9.39217371937639	-15.1152499618657	4.79025380803713e-42	6.88355716492065e-41	84.6992476896537	ATG13	not-changed
ABCC5	-0.852009484987061	9.07625167037862	-15.1143420464586	4.83425930284416e-42	6.94184485788041e-41	84.6901525029583	ABCC5	not-changed
RBM10	-0.836124875720811	10.6209799554566	-15.1114344660129	4.9779188351121e-42	7.14304780318114e-41	84.6610265486312	RBM10	not-changed
SMIM29	-1.69896595744681	7.93321380846325	-15.1079606811525	5.15514942868392e-42	7.39210296100259e-41	84.6262311719795	SMIM29	down-regulated
LINC02226	-1.19681208987871	6.91649665924276	-15.1053828417172	5.29072695975852e-42	7.5811191354436e-41	84.6004117684551	LINC02226	not-changed
MPI	-0.87065281368065	8.845714922049	-15.1036997112711	5.3811627908914e-42	7.70522890817908e-41	84.5835544616284	MPI	not-changed
TTLL10	-1.24085130244581	7.62158351893096	-15.1005198442783	5.55625063382052e-42	7.95028878839287e-41	84.5517083352038	TTLL10	down-regulated
RNF32	-1.19193875521972	7.02286191536748	-15.0959061527061	5.82044299587994e-42	8.32240788935713e-41	84.5055064473915	RNF32	not-changed
EFNB3	-1.35928494730562	7.19133630289532	-15.0910269870907	6.11348629392166e-42	8.73522304548225e-41	84.4566510870536	EFNB3	down-regulated
NR1D2	1.09234181745873	9.12096659242762	15.073113363051	7.32137652978746e-42	1.04537019983743e-40	84.27732518465	NR1D2	not-changed
ANKRD36B	1.82244547623783	9.05719153674833	15.0727254785871	7.35000997347962e-42	1.04871586040568e-40	84.2734430035075	ANKRD36B	up-regulated
NPSR1-AS1	-1.92926386955657	5.76927171492205	-15.0714621496825	7.44404524346844e-42	1.0613818681299e-40	84.260799074239	NPSR1-AS1	down-regulated
SS18L1	-0.763138456949696	9.52500890868597	-15.0530083375625	8.96272361514023e-42	1.27701392794942e-40	84.0761451263888	SS18L1	not-changed
ADAM21	-1.68477989659972	6.08072828507795	-15.0502686241206	9.21314776505695e-42	1.31176745827199e-40	84.0487371257349	ADAM21	down-regulated
INPP5E	-0.749189222509447	9.89028285077951	-15.0429463670887	9.91723914155485e-42	1.41101946600485e-40	83.9754935628709	INPP5E	not-changed
COX6A1	0.700184330880889	14.2837394209354	15.0427799112192	9.93385432362631e-42	1.41238672086481e-40	83.9738286632405	COX6A1	not-changed
KIN	0.699136488367465	9.92089532293987	15.0416318796142	1.0049206706545e-41	1.42778052438798e-40	83.9623461608897	KIN	not-changed
GSTM4	-1.02714028633924	8.1352583518931	-15.0360773335701	1.06264778909742e-41	1.5087353574643e-40	83.9067941975505	GSTM4	not-changed
RNF39	-1.64026090674091	6.62252115812918	-15.0328190500895	1.09803813933055e-41	1.55788507579473e-40	83.8742106935885	RNF39	down-regulated
GSX2	-1.59861306422748	6.62311581291759	-15.0259578562446	1.17645474557737e-41	1.66796794132105e-40	83.8056049605957	GSX2	down-regulated
EHMT2	-1.29276048916286	9.04914922048998	-15.0203927527591	1.24414414402672e-41	1.76269782766849e-40	83.7499665519533	EHMT2	down-regulated
TAGLN3	-2.12599349771327	5.93864365256125	-15.0202498148538	1.24593298296309e-41	1.76289896375084e-40	83.7485375868682	TAGLN3	down-regulated
BROX	0.622365480214759	11.3455434298441	15.0202416748647	1.24603493048209e-41	1.76289896375084e-40	83.7484562106874	BROX	not-changed
GTF3C6	0.663594491946709	12.4026703786192	15.0196218388267	1.25382243120273e-41	1.77219327144036e-40	83.7422596985379	GTF3C6	not-changed
OR10A5	-1.96698834758401	5.35914699331849	-15.0195790125293	1.25436228279619e-41	1.77219327144036e-40	83.7418315663839	OR10A5	down-regulated
ITPR3	-1.40424412408034	9.92113363028953	-15.014176051076	1.32436408940998e-41	1.86978322175032e-40	83.6878216930223	ITPR3	down-regulated
MRPS36	0.81710391727978	11.6667884187082	15.0108802396893	1.36896566591521e-41	1.93140075510962e-40	83.6548787773146	MRPS36	not-changed
BTBD2	-1.32256186120501	8.09330289532294	-15.0040797401115	1.46578852028174e-41	2.0665568082098e-40	83.5869127081254	BTBD2	down-regulated
TFPI	1.38916573871545	9.38530957683742	15.0037861403274	1.47011919041367e-41	2.07121404597694e-40	83.5839786206002	TFPI	up-regulated
VAMP8	0.815366056870166	13.1434409799555	14.9980287517412	1.55766974006846e-41	2.19302930373744e-40	83.5264460415548	VAMP8	not-changed
CAPRIN2	-1.08738198448995	9.53703563474387	-14.9978752621059	1.56007366187104e-41	2.19488102560935e-40	83.5249123466354	CAPRIN2	not-changed
FAM50A	-0.761180274408426	11.0118017817372	-14.997128657296	1.57181972899335e-41	2.2098645436705e-40	83.5174522168136	FAM50A	not-changed
ELF2	-0.696742374229474	9.86730957683742	-14.9968447267126	1.5763098328346e-41	2.21463292960128e-40	83.5146151940121	ELF2	not-changed
PCGF5	1.05220868960031	11.052434298441	14.9873974344887	1.7332362367267e-41	2.43341056884729e-40	83.420228403996	PCGF5	not-changed
GPR153	-1.15128967985684	9.00575501113586	-14.9860996260381	1.75597817322878e-41	2.46362393531423e-40	83.4072636954451	GPR153	not-changed
SDHD	0.723436508252133	12.5649153674833	14.9852917269758	1.77028538094417e-41	2.4819696498759e-40	83.3991932199691	SDHD	not-changed
JTB	0.721844462119709	14.0800757238307	14.9838619476948	1.79589123144325e-41	2.51611974406722e-40	83.3849108513971	JTB	not-changed
ABCD1	-1.38104772320542	8.0428574610245	-14.9822732629809	1.82477658870282e-41	2.55481394478038e-40	83.3690416743215	ABCD1	down-regulated
C9orf163	-1.66665122290714	7.02639420935412	-14.981990268442	1.82997040747403e-41	2.56030766031117e-40	83.3662149352554	C9orf163	down-regulated
EGFR	-1.60916613640883	7.66306904231626	-14.9795737112264	1.87492673932014e-41	2.62138682326167e-40	83.3420774662077	EGFR	down-regulated
DCTN4	0.583389222509453	11.1604944320713	14.9780580672712	1.90368358596963e-41	2.65974807877572e-40	83.3269393139234	DCTN4	not-changed
WDSUB1	0.950893497713256	9.0998864142539	14.9768842438231	1.92625700847782e-41	2.68942296038236e-40	83.3152155928121	WDSUB1	not-changed
OMA1	0.83285162060052	10.8217706013363	14.9716938447064	2.02931684243755e-41	2.83135341594349e-40	83.2633794452256	OMA1	not-changed
TTC30B	1.06671065818254	7.03093763919822	14.9668461640507	2.13053443154723e-41	2.97051899546498e-40	83.2149714112855	TTC30B	not-changed
MUC17	-1.8217997414993	6.40360133630289	-14.966608723133	2.13561951014864e-41	2.97555113642756e-40	83.2126005049194	MUC17	down-regulated
SMYD4	-0.642267568104993	9.12034966592428	-14.9663628829053	2.140897230848e-41	2.98084454911095e-40	83.210145742584	SMYD4	not-changed
NIPSNAP3A	0.994522310598525	10.1523741648107	14.9636408560414	2.20021098350556e-41	3.06131495089411e-40	83.1829666758114	NIPSNAP3A	not-changed
MAGT1	0.879840067607859	12.077714922049	14.9630094486879	2.21420217326645e-41	3.07865724242931e-40	83.1766623952911	MAGT1	not-changed
THOP1	-0.903516583813879	9.05163028953229	-14.9618658450097	2.2397693791896e-41	3.11205998992705e-40	83.1652443216731	THOP1	not-changed
PSMD13	-0.802020262477631	11.4839198218263	-14.9608194650662	2.26342097077874e-41	3.14275690026655e-40	83.1547972135295	PSMD13	not-changed
TERF1	0.733317538277985	10.1528886414254	14.9561724855593	2.37150522444496e-41	3.29056550791706e-40	83.1084044932681	TERF1	not-changed
GAU1	-1.65845199840923	6.62580846325167	-14.9556791141877	2.38327876248918e-41	3.30271292797793e-40	83.1034792453945	GAU1	down-regulated
PCNT	-0.93869395506065	10.4172472160356	-14.9556683539003	2.38353618878423e-41	3.30271292797793e-40	83.1033718277634	PCNT	not-changed
STAU2-AS1	-1.50737104792205	6.57692650334076	-14.9551909722927	2.39498490472143e-41	3.31629743572037e-40	83.0986062559996	STAU2-AS1	down-regulated
ARPC3	0.665282064028631	14.0133385300668	14.9539036413442	2.42613231050044e-41	3.35712103719968e-40	83.0857554319956	ARPC3	not-changed
DCUN1D1	0.754162954861803	11.1852962138085	14.9530471885109	2.44707805266766e-41	3.38236061499347e-40	83.0772060679915	DCUN1D1	not-changed
PARP10	-0.765306959634128	9.81163919821826	-14.9530207356226	2.44772785936981e-41	3.38236061499347e-40	83.0769420100891	PARP10	not-changed
SSBP1	0.780040763571277	13.187289532294	14.9523799052661	2.46352236650681e-41	3.40185441309204e-40	83.0705451639264	SSBP1	not-changed
RNF185	-0.688494034599326	9.6763429844098	-14.9505472798243	2.50925446123873e-41	3.46263375722342e-40	83.0522521810734	RNF185	not-changed
MMADHC	0.653376555975349	13.2900556792873	14.9478668895242	2.57767184305714e-41	3.55461299780267e-40	83.0254982919355	MMADHC	not-changed
IRF2BP1	-1.56727568104991	7.23825167037862	-14.9415181714686	2.74724136955002e-41	3.78586009921381e-40	82.9621359805023	IRF2BP1	down-regulated
RINT1	0.855340365877913	10.0806124721604	14.9391434175677	2.81349116307182e-41	3.87450787832589e-40	82.9384374666003	RINT1	not-changed
RBM42	-0.694073175581629	10.2252583518931	-14.93729472952	2.86616653731386e-41	3.9443538265382e-40	82.919989625117	RBM42	not-changed
EIF6	-0.626335255517985	11.4657772828508	-14.9359025782619	2.90648215223653e-41	3.99710686706962e-40	82.9060980161129	EIF6	not-changed
KMT2E	1.12402662557168	10.7458084632517	14.9329869738749	2.99275853783427e-41	4.11295193464735e-40	82.8770060071526	KMT2E	not-changed
AK6	0.829698448995822	11.4556592427617	14.9290551497313	3.11316635204016e-41	4.27551408879303e-40	82.8377771383651	AK6	not-changed
NEK9	-0.650589242394117	10.967438752784	-14.9260947177107	3.207005595823e-41	4.40139141030548e-40	82.8082423999317	NEK9	not-changed
MED31	0.99611103599125	10.483416481069	14.9253468978788	3.23115304583061e-41	4.4315154120402e-40	82.800782089645	MED31	not-changed
INPP5B	-1.10006430701929	8.85803786191537	-14.9237596104646	3.2830101786272e-41	4.49957635698864e-40	82.7849476000877	INPP5B	not-changed
EIF3F	0.658080433485786	14.327565701559	14.9195719035328	3.42384403455275e-41	4.68941029759633e-40	82.7431745174767	EIF3F	not-changed
MKRN1	-0.783431994432311	11.421583518931	-14.918833671075	3.44928877446749e-41	4.72105301982614e-40	82.735810933074	MKRN1	not-changed
ACTN2	-1.4959976337244	6.9903429844098	-14.9186421914569	3.45591928322052e-41	4.72691917700196e-40	82.7339010176617	ACTN2	down-regulated
SRP54	-0.55506528136806	10.8241158129176	-14.9179464260435	3.48011931744675e-41	4.75679224129111e-40	82.7269611678496	SRP54	not-changed
BIN3	-0.547762358321728	9.84082628062361	-14.91084241662	3.73709708551267e-41	5.10458091741335e-40	82.6561090979745	BIN3	not-changed
MAPKAPK2	-0.940073334658976	10.9621046770601	-14.9096919905086	3.78045783354602e-41	5.16031214503192e-40	82.6446363550276	MAPKAPK2	not-changed
CACNA1I	-1.35936050904752	6.81776837416481	-14.9056018461617	3.93872473544563e-41	5.37270834853311e-40	82.6038493851617	CACNA1I	down-regulated
MTOR	-1.08315875919666	7.84918040089087	-14.9053946818977	3.94691450946526e-41	5.38023958251042e-40	82.6017836409549	MTOR	not-changed
UBA3	0.676312328494724	12.209285077951	14.9041139401214	3.99792433770872e-41	5.44609139003686e-40	82.589012903777	UBA3	not-changed
DNAJB13	-0.972900397693386	8.03693541202673	-14.8960171417775	4.33598259465504e-41	5.90261614387848e-40	82.5082853851684	DNAJB13	not-changed
STIP1	-0.83455341022073	10.4691714922049	-14.8950798842241	4.37691267631654e-41	5.95431420156665e-40	82.4989416016243	STIP1	not-changed
TMC2	-1.5943785643269	5.87538084632517	-14.8944673489559	4.40387019110665e-41	5.9869471964195e-40	82.4928351729843	TMC2	down-regulated
OR2C1	-1.87085591568901	5.9040289532294	-14.8919524976556	4.51629547867638e-41	6.13564913380016e-40	82.4677652448041	OR2C1	down-regulated
TRIM62	-0.871022390137213	7.94053452115813	-14.8903799302923	4.58804696018722e-41	6.22893028716058e-40	82.452089438401	TRIM62	not-changed
PMF1	-0.791845476237828	10.1154075723831	-14.8896172373458	4.62325479824024e-41	6.27250605567439e-40	82.4444868960394	PMF1	not-changed
GET4	-0.900426864187709	9.04830289532294	-14.8873131704124	4.73126208521886e-41	6.41472595158692e-40	82.4215206991794	GET4	not-changed
RNPEP	-0.750073951083717	10.5632739420935	-14.8846267947885	4.86037358851333e-41	6.58534891922159e-40	82.3947452908256	RNPEP	not-changed
RNF8	-0.830463352555187	9.4273719376392	-14.88205636055	4.98720246225736e-41	6.75265203771462e-40	82.3691270145408	RNF8	not-changed
FAM230B	-1.66709335852058	6.03363028953229	-14.8800976415511	5.08606067208724e-41	6.88188383959402e-40	82.3496064143729	FAM230B	down-regulated
AKAP8L	-1.02665714853848	9.27741202672606	-14.879793783666	5.10157085109285e-41	6.89824077323159e-40	82.3465782436404	AKAP8L	not-changed
OXER1	-1.29336903957049	8.11699109131403	-14.8787007347577	5.15775589832962e-41	6.96953865055118e-40	82.3356853682513	OXER1	down-regulated
CSNK1G2	-0.757056412805721	10.7491247216036	-14.8743290715014	5.38870927853701e-41	7.27674265000566e-40	82.2921218835897	CSNK1G2	not-changed
CD55	1.16420520978325	9.90611135857461	14.8733020470604	5.44444657234251e-41	7.34708750635859e-40	82.2818882474486	CD55	not-changed
RAD9A	-0.770210379797172	9.767714922049	-14.8691117458848	5.6778814610658e-41	7.65697445729415e-40	82.2401370831456	RAD9A	not-changed
ATP5F1E	0.614509206601715	14.8502160356347	14.867050722165	5.79633521883184e-41	7.81149160072652e-40	82.2196029978191	ATP5F1E	not-changed
HACL1	0.790108053290897	10.0254877505568	14.8639446565479	5.97952504214218e-41	8.05298626417025e-40	82.1886589322635	HACL1	not-changed
KRT1	-1.95790682044144	5.68049665924276	-14.8637902417727	5.98878136975141e-41	8.06006817059801e-40	82.1871206379936	KRT1	down-regulated
AAAS	-0.947010857029225	8.76953006681515	-14.8589779915865	6.28452735222508e-41	8.45245870234889e-40	82.1391832785021	AAAS	not-changed
ANHX	-1.60927584012726	7.95632739420935	-14.8559069162186	6.4808381409277e-41	8.7106785172829e-40	82.1085934374895	ANHX	down-regulated
BMS1	-0.734678206402862	10.1172160356347	-14.8534469965963	6.64248621362211e-41	8.92199630598503e-40	82.0840926434052	BMS1	not-changed
SLC7A6	-1.0503210379797	10.8010824053452	-14.85179316925	6.75341900958513e-41	9.06495876512955e-40	82.0676213028822	SLC7A6	not-changed
C20orf181	-1.64698490753628	6.81989086859688	-14.8512478199072	6.79040283825106e-41	9.10853703406384e-40	82.0621900174664	C20orf181	down-regulated
PRC1	-1.06649365679061	10.786710467706	-14.8466704231733	7.10890141657393e-41	9.52942562895924e-40	82.0166051310345	PRC1	not-changed
ITGA1	1.54085869954265	6.07305122494432	14.841699382742	7.47169379765271e-41	1.00090909404968e-39	81.9671054922816	ITGA1	up-regulated
THTPA	-0.747388009544638	9.12187750556793	-14.8415561359294	7.48241752472507e-41	1.00168007779537e-39	81.96567918141	THTPA	not-changed
LOC401261	-1.32230419566513	7.96428953229399	-14.8379473724094	7.75770182412409e-41	1.03784357316633e-39	81.9297482130407	LOC401261	down-regulated
KIF5A	-1.29646229866773	6.90689977728285	-14.8375011493269	7.79243524611688e-41	1.041798985391e-39	81.9253055611645	KIF5A	down-regulated
ADGRL4	1.29145899781269	8.50915812917595	14.8334899932082	8.11170788361202e-41	1.08376502744534e-39	81.8853720454051	ADGRL4	up-regulated
TECPR1	-1.16650250546827	10.3810022271715	-14.8308985047526	8.32488698436833e-41	1.11151024166788e-39	81.8595741514482	TECPR1	not-changed
LMF1	-1.41386382978724	8.25199554565702	-14.8300366773769	8.39701336485016e-41	1.12039832196389e-39	81.8509951254051	LMF1	down-regulated
NUDT3	-0.908524895605472	10.4846347438753	-14.8238154392707	8.93649820027356e-41	1.19159219719388e-39	81.789071116106	NUDT3	not-changed
COX10	-0.583619228474841	9.78600445434298	-14.823145922989	8.99657913146647e-41	1.19881052127889e-39	81.7824075168694	COX10	not-changed
SLC16A1-AS1	-1.3016819646053	7.59293541202673	-14.8214664028326	9.14907511297102e-41	1.21832564962093e-39	81.7656919475682	SLC16A1-AS1	down-regulated
BRAF	-0.750323961026043	9.28603563474388	-14.8203020731473	9.25630420346722e-41	1.23179108281256e-39	81.7541042363541	BRAF	not-changed
TOP3A	-0.79478743288925	8.25759688195991	-14.8197175277452	9.3106098429231e-41	1.2382005609708e-39	81.7482868062945	TOP3A	not-changed
TCF20	-0.622172419964203	9.54418262806236	-14.8187902944498	9.39740477395855e-41	1.2489194307698e-39	81.7390590874002	TCF20	not-changed
PIP4K2B	-0.759172320540856	9.19607795100223	-14.8125956015623	9.99834751937507e-41	1.32790964649618e-39	81.6774152920958	PIP4K2B	not-changed
CHURC1	1.07885350964406	11.9796570155902	14.8116257368103	1.00958439548853e-40	1.33997570753418e-39	81.6677649040167	CHURC1	not-changed
HCP5B	-1.65116315370849	6.48179732739421	-14.8112732355965	1.01315139659777e-40	1.34382534913208e-39	81.6642574856397	HCP5B	down-regulated
RGS18	1.71652831576854	8.37045879732739	14.8108272514944	1.017682385724e-40	1.34894770404876e-39	81.6598199452357	RGS18	up-regulated
NAT1	0.662849453171601	10.3127706013363	14.8101215917988	1.02489289414565e-40	1.35761272265903e-39	81.6527987270985	NAT1	not-changed
LINC00508	-1.89069198647842	5.64510244988864	-14.8079355135852	1.04755562219443e-40	1.38672152981365e-39	81.6310482740323	LINC00508	down-regulated
PIP4P1	-0.630690693974943	9.97212694877506	-14.8028922371744	1.10176395437616e-40	1.45752382442111e-39	81.5808742415333	PIP4P1	not-changed
RTN4	0.643164843905353	13.4600311804009	14.8012726198543	1.1197595124021e-40	1.48035878882221e-39	81.564762403136	RTN4	not-changed
ODR4	0.719249930403652	9.0889710467706	14.7998656723074	1.13562994756489e-40	1.50035618432868e-39	81.5507666800375	ODR4	not-changed
CHID1	-0.761511035991251	9.22379732739421	-14.7984335196132	1.15201519776007e-40	1.52100709902035e-39	81.5365206961484	CHID1	not-changed
ADH5	0.692095386756817	12.0639777282851	14.7956467841622	1.1845772873249e-40	1.56297530692129e-39	81.5088016939967	ADH5	not-changed
ASB14	-1.46283788029429	6.79463251670379	-14.7915942378665	1.233575484863e-40	1.62656084697992e-39	81.4684951721946	ASB14	down-regulated
STAM2	0.938870729767343	10.0143051224944	14.790874323974	1.24248891414105e-40	1.63724307176455e-39	81.4613353243151	STAM2	not-changed
POTEKP	-0.876223026446603	9.43063028953229	-14.7868842570965	1.29306869219329e-40	1.70277974548066e-39	81.4216545975694	POTEKP	not-changed
CFAP410	-1.54247065022868	6.91556347438753	-14.782758921671	1.34752394119534e-40	1.77333095159526e-39	81.3806325178144	CFAP410	down-regulated
NPFF	-1.66340956452575	7.33997327394209	-14.7763291197331	1.43699583757747e-40	1.88984168828436e-39	81.316702831859	NPFF	down-regulated
LOC101927884	-1.81945991250745	6.1132271714922	-14.7726023676526	1.49154260410109e-40	1.96029924649819e-39	81.279653190874	LOC101927884	down-regulated
EMC8	0.689228971962613	11.0494966592428	14.771210032435	1.51244748247838e-40	1.98647906802909e-39	81.2658120674434	EMC8	not-changed
DDA1	-0.869162596937754	9.09418262806236	-14.7705075611494	1.52310525643971e-40	1.99917480957558e-39	81.2588290121903	DDA1	not-changed
PSMA4	0.695780234639091	13.2529510022272	14.7672609156555	1.57334449733396e-40	2.06377348150618e-39	81.2265565782218	PSMA4	not-changed
PRR3	-1.07886856233843	8.00994432071269	-14.7651999313112	1.60609102086428e-40	2.10535767696e-39	81.2060711719186	PRR3	not-changed
BORCS7	0.756391489361697	10.6471158129176	14.7637783972796	1.62907285748355e-40	2.13409602857218e-39	81.1919422361602	BORCS7	not-changed
PPP4R2	0.736160131238828	11.4238775055679	14.761797250571	1.66165017427323e-40	2.17535903659238e-39	81.1722519728084	PPP4R2	not-changed
C1orf159	-1.51471912905151	6.99502004454343	-14.7564365091455	1.75309609941643e-40	2.29358666192956e-39	81.1189771039418	C1orf159	down-regulated
PIGC	0.64525961423743	10.3617572383073	14.756287763206	1.75570381999559e-40	2.29550873637685e-39	81.1174989672497	PIGC	not-changed
LINC02603	2.05152328494731	5.55883296213808	14.7533530088035	1.80795288362799e-40	2.36229021949604e-39	81.0883364148947	LINC02603	up-regulated
KANSL1L	-1.15739767349373	8.22964810690423	-14.7468116517765	1.93006225685485e-40	2.5202062927753e-39	81.0233424089134	KANSL1L	not-changed
KMT2D	-1.02067965798369	10.8105077951002	-14.7466378423022	1.93341664208414e-40	2.52295229262514e-39	81.0216155986055	KMT2D	not-changed
NFKBID	-1.36460721813483	9.94170601336303	-14.745902547579	1.94767171791711e-40	2.53991005853343e-39	81.0143104678466	NFKBID	down-regulated
SRP19	0.651301014118104	12.3737728285078	14.7409489209427	2.04647857301826e-40	2.66703649066717e-39	80.9650996304832	SRP19	not-changed
ARHGAP27P1	-1.71267335454365	6.20423385300668	-14.7405989806301	2.05364482225061e-40	2.67464685151127e-39	80.9616234336821	ARHGAP27P1	down-regulated
HPYR1	-1.30004839928416	6.78236080178174	-14.7390959641059	2.08471011810078e-40	2.71335317566365e-39	80.9466932668543	HPYR1	down-regulated
TATDN2	-0.660091887055088	10.6122160356347	-14.7311005385475	2.2580178783238e-40	2.93702570612169e-39	80.8672798500667	TATDN2	not-changed
CENATAC	-0.873472559156896	10.3975412026726	-14.7308081440007	2.26462122037766e-40	2.94371556570174e-39	80.8643759670282	CENATAC	not-changed
MED15	-0.852531576854251	10.0482538975501	-14.7306939416032	2.26720555850399e-40	2.94517598356952e-39	80.8632417844046	MED15	not-changed
FGF7	1.46184283157685	6.4032293986637	14.7298965782165	2.28533163365245e-40	2.96681075763472e-39	80.8553229842044	FGF7	up-regulated
POLD2	-0.897678842712253	10.2959020044543	-14.7292984259236	2.29902398536768e-40	2.98266554498056e-39	80.8493826932945	POLD2	not-changed
RALA	0.652442990654208	12.0347639198218	14.7287336600021	2.31202719897432e-40	2.99760645392419e-39	80.843774041696	RALA	not-changed
ZCCHC9	0.861131696162261	10.3436748329621	14.7270032737456	2.35232632189447e-40	3.04789530692252e-39	80.8265901602605	ZCCHC9	not-changed
GOLGA8A	-1.85465919665937	11.2052293986637	-14.7261048688645	2.37352495736758e-40	3.07338706907436e-39	80.8176686818415	GOLGA8A	down-regulated
CFAP36	0.914452316563935	9.35240311804009	14.7209931153187	2.49781974672492e-40	3.23225570691406e-39	80.7669107654055	CFAP36	not-changed
COIL	0.583728733346598	10.1353541202673	14.7199922686624	2.52290555192181e-40	3.26262340168669e-39	80.7569734281049	COIL	not-changed
TTC6	-1.62972883276993	6.2129153674833	-14.7165806361305	2.61032057648641e-40	3.37350468862451e-39	80.7231013331048	TTC6	down-regulated
PDIA6	-0.842622131636524	12.5027683741648	-14.7162355263485	2.61932977147823e-40	3.3829793416254e-39	80.7196750932182	PDIA6	not-changed
COX7A2	0.932396719029617	13.7206748329621	14.7145607444544	2.66349296677157e-40	3.43781573003084e-39	80.7030483049983	COX7A2	not-changed
MRPL22	0.809260648240206	11.0833140311804	14.7133080728604	2.69701023966122e-40	3.47884986831797e-39	80.6906125465996	MRPL22	not-changed
ATP5PF	0.64148236229866	13.6173697104677	14.7114861067543	2.74651242714827e-40	3.54043715113403e-39	80.6725258390752	ATP5PF	not-changed
FNDC3A	0.87109232451779	10.3785924276169	14.7106383839793	2.76985274831799e-40	3.56824289193859e-39	80.6641107381559	FNDC3A	not-changed
MPLKIP	0.832664485981315	11.4160601336303	14.710144838807	2.78353254443829e-40	3.58357596605495e-39	80.6592115346642	MPLKIP	not-changed
FAAP100	-0.752895148140778	9.01670378619154	-14.7085113446162	2.82929132434286e-40	3.64016224569728e-39	80.6429969731546	FAAP100	not-changed
FASTKD3	0.821693557367265	10.6112227171492	14.7074494967512	2.85943838456859e-40	3.67660314230148e-39	80.6324570844413	FASTKD3	not-changed
PCGF1	-0.614424995028838	9.54301559020045	-14.7066223806273	2.8831430087023e-40	3.70471932431147e-39	80.6242473241058	PCGF1	not-changed
ZNF343	-0.707714893617029	8.38640757238307	-14.6990929035007	3.10815253079276e-40	3.99130338683522e-39	80.5495189193702	ZNF343	not-changed
RNA45SN5	-2.14588168621992	8.4731135857461	-14.695192919542	3.23150145569661e-40	4.1470592519605e-39	80.5108176947716	RNA45SN5	down-regulated
NAP1L4	-0.620247882282751	10.6467594654788	-14.6868588786577	3.51170372467403e-40	4.50378236597666e-39	80.4281274543503	NAP1L4	not-changed
ARSA	-1.37256571883078	8.04524053452116	-14.6849891732754	3.57782265626656e-40	4.58566322778068e-39	80.4095785191063	ARSA	down-regulated
CHD3	-1.26790813282959	9.65163251670379	-14.6836971816381	3.62423594054793e-40	4.64219954240069e-39	80.3967614381446	CHD3	down-regulated
KHDC4	-0.74266042950884	11.7834498886414	-14.6825558717359	3.66573557993256e-40	4.69237428742986e-39	80.385439509895	KHDC4	not-changed
OPN5	-0.763744601312393	7.5086859688196	-14.6806072102862	3.73769030936582e-40	4.78006955012561e-39	80.3661092726006	OPN5	not-changed
ERICH6	-1.96915818254126	5.36581069042316	-14.6805724646776	3.73898600295029e-40	4.78006955012561e-39	80.3657646129613	ERICH6	down-regulated
MUTYH	-0.772605189898586	10.2261692650334	-14.6783841122479	3.82150088631291e-40	4.8824638383368e-39	80.3440577913243	MUTYH	not-changed
MYH9	-1.13349791210976	10.7927795100223	-14.6730990452726	4.02835105897324e-40	5.14348231158704e-39	80.2916385570053	MYH9	not-changed
EML2	-0.73541682242989	8.97328953229399	-14.6710228585831	4.112633049498e-40	5.24777182980564e-39	80.2710479884675	EML2	not-changed
GGA1	-0.818525492145557	12.3153808463252	-14.6666393245815	4.29640343630158e-40	5.4787975761718e-39	80.2275776795871	GGA1	not-changed
PCED1A	-1.01050528932193	9.21299109131403	-14.6650759301931	4.36390860523624e-40	5.56136291973248e-39	80.2120750292243	PCED1A	not-changed
UBB	0.575674468085113	15.4532004454343	14.6603838041943	4.57292775015038e-40	5.82405536138862e-39	80.165551302772	UBB	not-changed
TMEM9B	0.576382282759997	11.4159888641425	14.659713805942	4.60357798541145e-40	5.85938988408335e-39	80.1589085122349	TMEM9B	not-changed
THOC6	-1.3538808709485	8.32736302895323	-14.6595677158511	4.61028829929425e-40	5.86422854271743e-39	80.1574600959671	THOC6	down-regulated
RTEL1	-0.91845343010539	7.93134521158129	-14.6594179204775	4.61717893939032e-40	5.86929032768274e-39	80.1559749487959	RTEL1	not-changed
CABP4	-1.13372555179958	7.84563697104677	-14.6575939944645	4.70190895877286e-40	5.97323166463892e-39	80.1378920513896	CABP4	not-changed
ASB1	-0.806801610658177	9.18096436525613	-14.6545239067872	4.84804651769897e-40	6.15500414630535e-39	80.1074561581569	ASB1	not-changed
PWWP3A	-0.929211374030626	8.88501781737194	-14.654273162826	4.86018031710625e-40	6.16652582587659e-39	80.1049704597899	PWWP3A	not-changed
PARG	-0.688312825611456	9.41903786191537	-14.6499954737828	5.0719128817459e-40	6.43112173640749e-39	80.0625667834045	PARG	not-changed
DNHD1	-1.39445183933188	7.32554120267261	-14.6469683261531	5.22728391845532e-40	6.62396424135623e-39	80.0325620524304	DNHD1	down-regulated
RPRD1B	-1.08703895406642	9.92707572383073	-14.6464970150188	5.25189793027976e-40	6.65097450831471e-39	80.0278906686729	RPRD1B	not-changed
MED22	-0.707680393716444	9.07587082405345	-14.6440292823776	5.38267430604447e-40	6.81230989856639e-39	80.0034326889561	MED22	not-changed
XPO7	-0.810407715251534	9.91368819599109	-14.6324961460979	6.03826496516138e-40	7.63723086340142e-39	79.8891457532997	XPO7	not-changed
SLC6A13	-1.46833921256711	6.85704454342984	-14.6290442309478	6.24955366887283e-40	7.89951420176459e-39	79.8549453914411	SLC6A13	down-regulated
ZNF611	-0.932958301849276	9.60204899777283	-14.6243187223184	6.55080756418506e-40	8.27511474320395e-39	79.8081313425331	ZNF611	not-changed
EDC3	-0.609233982899179	9.64557906458797	-14.6228785514513	6.6454679501225e-40	8.38943514980712e-39	79.7938651112599	EDC3	not-changed
ENOPH1	0.674261900974351	11.8819844097996	14.6223599981808	6.67988481886371e-40	8.42760687316091e-39	79.7887284808744	ENOPH1	not-changed
CEP95	-0.757081785643264	9.50004454342984	-14.6214344590655	6.74175624191973e-40	8.50034694142237e-39	79.7795605333024	CEP95	not-changed
CMC1	1.12162718234242	11.3707371937639	14.6208343054794	6.78218116298381e-40	8.54597215168229e-39	79.7736158089364	CMC1	not-changed
COX18	0.682973533505665	10.4063407572383	14.6200000961578	6.8387734970206e-40	8.6118995923443e-39	79.7653528268955	COX18	not-changed
BLOC1S2	0.753741459534711	12.4758953229399	14.6176626605664	6.99986572178079e-40	8.80925673013874e-39	79.7422010285833	BLOC1S2	not-changed
ZKSCAN1	-0.779881208987877	10.9248886414254	-14.6170099314711	7.04552309642043e-40	8.86118472532329e-39	79.7357361212051	ZKSCAN1	not-changed
FAM86C1P	-1.6314665341022	6.59047438752784	-14.6157638075981	7.13351410753527e-40	8.96625797518819e-39	79.7233942630304	FAM86C1P	down-regulated
JAK3	-0.975686896003177	11.6992115812918	-14.612533080223	7.36678066516902e-40	9.25368629224129e-39	79.6913982356166	JAK3	not-changed
RPL26L1	1.21468789023663	11.6776146993318	14.6117291560176	7.42599877330568e-40	9.3222640889549e-39	79.6834368329921	RPL26L1	up-regulated
TAF6L	-1.15260604493935	7.01880846325167	-14.6102279126978	7.5378566442922e-40	9.4567970009692e-39	79.6685701727913	TAF6L	not-changed
TMBIM4	0.607433406243779	13.1844521158129	14.6068593162039	7.7950065659077e-40	9.77332881686973e-39	79.6352132769515	TMBIM4	not-changed
CAMLG	0.787077351362088	11.4431113585746	14.6058934035658	7.870343343963e-40	9.86165271333984e-39	79.6256490117983	CAMLG	not-changed
ARHGAP18	1.11104959236428	10.6048574610245	14.6055239879781	7.89934771446247e-40	9.89184778082471e-39	79.6219911952055	ARHGAP18	not-changed
RSKR	-1.64665577649633	7.88835412026726	-14.6038175631813	8.03471634959568e-40	1.00551158488019e-38	79.6050952341663	RSKR	down-regulated
C2CD2L	-1.37230592563134	8.04472605790646	-14.6022677952215	8.15966174656675e-40	1.02051451906037e-38	79.5897509998251	C2CD2L	down-regulated
ANP32A-IT1	-1.69108989858819	6.4096570155902	-14.6012956101269	8.23902867955752e-40	1.02980196657507e-38	79.5801257020122	ANP32A-IT1	down-regulated
LAMP2	0.877155418572269	11.7536013363029	14.6009251772945	8.2694721756028e-40	1.03296671953115e-38	79.5764582233718	LAMP2	not-changed
SHFL	-0.848966355140192	10.312570155902	-14.5957778283822	8.7042988966542e-40	1.0866091025105e-38	79.5255002029056	SHFL	not-changed
ALKBH6	-0.607543746271627	9.77718040089087	-14.5949817616586	8.77355431683844e-40	1.09457690954072e-38	79.5176198264563	ALKBH6	not-changed
UNC93B1	-1.32781047922053	8.52936302895323	-14.5863996843009	9.55599233148715e-40	1.19145554356903e-38	79.4326743526834	UNC93B1	down-regulated
DHRS1	-0.960485941539075	9.56769487750557	-14.5860863798579	9.58583744425516e-40	1.19443800193837e-38	79.4295735993795	DHRS1	not-changed
RGS10	0.994410578643866	12.5763251670379	14.5784528673862	1.03424396466662e-39	1.2879180093665e-38	79.3540325698747	RGS10	not-changed
RBFADN	-1.80783801948698	5.86953229398664	-14.5771419256948	1.04782421645784e-39	1.3040237054325e-38	79.3410609461612	RBFADN	down-regulated
DEPDC5	-1.52877667528335	7.9216859688196	-14.5768538785843	1.05083189788542e-39	1.30696001809179e-38	79.3382108074969	DEPDC5	down-regulated
WDR24	-1.38825718830781	7.73319153674833	-14.5766476859593	1.05299017265555e-39	1.30883692175762e-38	79.3361706064478	WDR24	down-regulated
LINGO1-AS2	-1.67756023066215	6.34564587973274	-14.5728674029094	1.09335249513411e-39	1.358168801873e-38	79.2987679062234	LINGO1-AS2	down-regulated
SLC9B2	-0.929538198448999	8.50519821826281	-14.5685461104261	1.14138497331667e-39	1.41696197333973e-38	79.2560166201347	SLC9B2	not-changed
PRODH2	-1.77800483197455	6.18167037861915	-14.5584543966358	1.26191487374069e-39	1.56562866273761e-38	79.1561952254317	PRODH2	down-regulated
ESCO2	1.58146581825412	7.78511581291759	14.5582989546548	1.26386740044469e-39	1.56708675648004e-38	79.1546578768383	ESCO2	up-regulated
MTHFD2L	1.11894993040366	8.92927394209354	14.5476700807386	1.40478029214188e-39	1.74073604608927e-38	79.0495503898536	MTHFD2L	not-changed
FKSG49	-0.909787492543256	10.1740712694878	-14.5447397741608	1.44631385009962e-39	1.79110156829597e-38	79.0205778271339	FKSG49	not-changed
VPS26B	-0.95193869556571	8.59696436525613	-14.5433764107838	1.46605324290871e-39	1.81443213200015e-38	79.0070986780649	VPS26B	not-changed
COPS8	0.571830244581422	11.8461937639198	14.5430668640563	1.47057230555731e-39	1.81890848173871e-38	79.0040383491509	COPS8	not-changed
GLIPR1	1.16474034599324	10.095438752784	14.5413462404462	1.49594610980704e-39	1.84915815572163e-38	78.9870278567655	GLIPR1	not-changed
QSER1	0.776116444621199	10.9793808463252	14.5391008210794	1.52971699200378e-39	1.88974413454585e-38	78.9648301961823	QSER1	not-changed
SMARCB1	-1.0912533505667	11.0577394209354	-14.5385049972531	1.53880509671538e-39	1.89980707623262e-38	78.9589402358604	SMARCB1	not-changed
NPEPPS	-0.615513223304832	10.2631692650334	-14.5384002587214	1.54040823139234e-39	1.90062242063041e-38	78.9579048619298	NPEPPS	not-changed
RTP5	-0.822467389142972	3.56880846325167	-14.5376282480972	1.55227618744352e-39	1.91409420275528e-38	78.9502733723173	RTP5	not-changed
BCS1L	-0.702468820839137	10.0208440979955	-14.5367201777796	1.56635255340335e-39	1.93027101645263e-38	78.9412970899708	BCS1L	not-changed
ALOX12-AS1	-1.1171988466892	8.19854788418708	-14.5322854708246	1.63694763915932e-39	2.01603551332261e-38	78.8974628715265	ALOX12-AS1	not-changed
ZNF37A	1.20997574070392	8.24196881959911	14.5315840728367	1.64840011255419e-39	2.02890077345575e-38	78.8905304451147	ZNF37A	up-regulated
LOC102724814	-1.77427078942136	7.31821603563474	-14.5310269166472	1.6575543310586e-39	2.03892329886958e-38	78.8850237510526	LOC102724814	down-regulated
ESPL1	-1.06273145754623	10.2956993318486	-14.5282080828115	1.70465164700796e-39	2.09557816191021e-38	78.8571647642435	ESPL1	not-changed
SMIM30	0.957423384370637	10.1621603563474	14.5269176015948	1.72665630111717e-39	2.12133562991001e-38	78.8444113803779	SMIM30	not-changed
TMEM198	-1.27844937363293	7.69737861915367	-14.5233297316721	1.78933527717878e-39	2.19700295512798e-38	78.8089558338145	TMEM198	down-regulated
ATP6V1G2	-1.63252996619606	6.46379732739421	-14.5200941232797	1.84780430720337e-39	2.26741221165716e-38	78.7769840616284	ATP6V1G2	down-regulated
CD58	1.34072052097832	11.3247305122494	14.5178163517614	1.8901041296623e-39	2.31790689526287e-38	78.7544784298711	CD58	up-regulated
ARL6IP5	0.780838417180361	13.5727505567929	14.5157919019618	1.92850964867471e-39	2.36356735726024e-38	78.7344768238624	ARL6IP5	not-changed
CLIC1	0.634595645257505	13.5436703786192	14.5136667391495	1.96966352986446e-39	2.41253866498161e-38	78.7134812532953	CLIC1	not-changed
THOC7	0.874382919069394	12.1986458797327	14.5092818158144	2.05736713035259e-39	2.51843222313531e-38	78.6701638574223	THOC7	not-changed
FAM153A	-1.6428432491549	6.42949888641425	-14.5073225144527	2.09780442240876e-39	2.56637348059363e-38	78.650810010147	FAM153A	down-regulated
VPS13A	-1.21740119308013	9.15687082405345	-14.5035492287838	2.177926916637e-39	2.66277650493139e-38	78.6135404069781	VPS13A	down-regulated
LINC00623	0.90865653211373	11.0949599109131	14.5013972255149	2.22498236598901e-39	2.71865875640633e-38	78.5922861483644	LINC00623	not-changed
MCPH1	0.890233366474448	8.55496213808463	14.500357812324	2.24807191257593e-39	2.74520762140783e-38	78.5820207930337	MCPH1	not-changed
OTX1	-1.67564627162458	5.71244320712695	-14.4979722216199	2.30197331018788e-39	2.80932711299624e-38	78.5584614512077	OTX1	down-regulated
CTDNEP1	-0.719223742294696	10.7678797327394	-14.4958406705747	2.35122438814545e-39	2.86769721049005e-38	78.5374121108666	CTDNEP1	not-changed
CHST10	-0.920147922052086	8.89574610244989	-14.4921301657167	2.43947888125011e-39	2.97353891927953e-38	78.5007730701972	CHST10	not-changed
TMEM147-AS1	-1.16327542254921	9.41690200445434	-14.4813220013842	2.71583360011715e-39	3.30839403093425e-38	78.3940682012426	TMEM147-AS1	not-changed
RMDN3	-0.562811871147346	9.99529175946548	-14.4812315263663	2.71827408047585e-39	3.30936737539092e-38	78.3931750978093	RMDN3	not-changed
DSCR9	-1.48674871743885	6.64576391982183	-14.4782225381476	2.80069704373234e-39	3.4076555883336e-38	78.3634737121914	DSCR9	down-regulated
CNOT2	0.681196082720222	11.6735233853007	14.4775997324116	2.81806603036001e-39	3.42672070193536e-38	78.3573263462438	CNOT2	not-changed
PRKY	-1.69937357327501	7.19115144766147	-14.4735820596422	2.93272347530752e-39	3.56399264530891e-38	78.3176724594648	PRKY	down-regulated
AP3D1	-0.654907257904155	11.5582828507795	-14.4660324209503	3.16091293898272e-39	3.83898588932715e-38	78.2431693606961	AP3D1	not-changed
IL18	1.38758709484987	10.8150890868597	14.4588394679905	3.39477419343314e-39	4.12053236085524e-38	78.1721993393968	IL18	up-regulated
FOXP4	-0.935295148140785	8.85216926503341	-14.4566241097071	3.47021970696129e-39	4.20957277449137e-38	78.1503438630141	FOXP4	not-changed
NAB2	-0.880035414595346	8.68915367483296	-14.4505383806141	3.68619213429204e-39	4.46887069269163e-38	78.0903117673785	NAB2	not-changed
ASPHD1	-1.38530103400278	7.07815367483296	-14.4498352347176	3.7119942187458e-39	4.4974468415946e-38	78.0833762451795	ASPHD1	down-regulated
WDR90	-0.988479021674296	8.94628062360802	-14.4496815297644	3.71765840502595e-39	4.50160427049419e-38	78.0818601834357	WDR90	not-changed
ADAD1	-1.26737444820043	7.10856347438753	-14.4490971985452	3.73927041449738e-39	4.52505587194968e-38	78.076096712962	ADAD1	down-regulated
UMAD1	0.814489938357534	9.48861915367483	14.4467585227812	3.82703023221476e-39	4.62847969476195e-38	78.0530303575166	UMAD1	not-changed
LOC100652768	-1.95613734340822	6.12875278396436	-14.4463785406609	3.84148199212656e-39	4.64317256854098e-38	78.0492827230435	LOC100652768	down-regulated
TMEM161A	-0.713238317757011	10.1430601336303	-14.4446290550452	3.90872518450356e-39	4.72161824114897e-38	78.0320286050625	TMEM161A	not-changed
CCNG1	0.922009842911121	12.8464008908686	14.4436458280148	3.94703051217049e-39	4.76503485963289e-38	78.0223319664675	CCNG1	not-changed
PTPRA	-0.63879741499305	9.77831848552339	-14.4414199394231	4.03513747655062e-39	4.86848633541215e-38	78.0003810217331	PTPRA	not-changed
AVIL	-1.04169308013522	8.47664142538975	-14.4404178073685	4.07544253162188e-39	4.91417445454718e-38	77.9904987445755	AVIL	not-changed
C6orf120	0.784650864983094	10.1939420935412	14.4390886168987	4.12952186304209e-39	4.97640706998156e-38	77.9773916481323	C6orf120	not-changed
GRM6	-1.25613276993438	6.66619376391982	-14.4364898228469	4.23733274244515e-39	5.10327750420769e-38	77.9517663122788	GRM6	down-regulated
UBA2	0.770850288327701	12.4882538975501	14.4339937429558	4.34352481674488e-39	5.22804798987424e-38	77.9271553731579	UBA2	not-changed
ABCF1	-0.717002207198261	11.4718151447661	-14.4294335636708	4.54443269851572e-39	5.46660546746871e-38	77.882196769185	ABCF1	not-changed
TOLLIP	-0.679108470868956	8.87141202672606	-14.4281432785777	4.60294292673162e-39	5.53368708084891e-38	77.869476849042	TOLLIP	not-changed
STX8	0.667919705706893	10.9370935412027	14.4268761263694	4.66113542663161e-39	5.60030699262932e-38	77.8569853830919	STX8	not-changed
DYNC1H1	-0.870438178564324	11.098004454343	-14.4261738811043	4.69370067097444e-39	5.63607499866085e-38	77.8500628889468	DYNC1H1	not-changed
PIM2	-1.56139948299861	10.8864097995546	-14.4259453871564	4.70434548695061e-39	5.64549460490543e-38	77.8478105001843	PIM2	down-regulated
MRPL1	0.920994412408049	11.0659977728285	14.4202719860126	4.97651352272028e-39	5.96855973417986e-38	77.7918888966006	MRPL1	not-changed
C11orf58	0.541999304036583	13.1579844097996	14.4183496270005	5.07225215519703e-39	6.07976668852124e-38	77.7729424078966	C11orf58	not-changed
RAB26	-0.999984668920262	7.04312026726058	-14.4142685208722	5.28163582512915e-39	6.32697919610392e-38	77.7327226928216	RAB26	not-changed
SCFD1	0.493025154106185	10.768429844098	14.4141133067941	5.28976715156805e-39	6.33295697997408e-38	77.7311931247244	SCFD1	not-changed
DTX2	-1.18276196062836	8.0879420935412	-14.4103472154166	5.49093756048916e-39	6.56989864433365e-38	77.6940817627912	DTX2	not-changed
STK11IP	-1.01754086299463	8.32632293986637	-14.40844015258	5.59569807600603e-39	6.69127336360366e-38	77.6752907719748	STK11IP	not-changed
SAP18	0.643361543050302	13.0803674832962	14.4081901037694	5.60958101236128e-39	6.70389820925997e-38	77.6728270168542	SAP18	not-changed
VPS29	0.620552177371263	12.7590579064588	14.4067835118101	5.6883189301341e-39	6.79396907289298e-38	77.6589680226718	VPS29	not-changed
PMPCB	0.812880373831774	12.1888307349666	14.4064688566493	5.70608297291042e-39	6.81115090685891e-38	77.6558678283446	PMPCB	not-changed
NCR2	-0.848283793994836	8.07470824053452	-14.4029854847429	5.90647469668678e-39	7.0461796662664e-38	77.6215489662247	NCR2	not-changed
ZNF514	-1.07204014714655	8.31192650334076	-14.4017772150427	5.97761147568819e-39	7.12682584041097e-38	77.609645568636	ZNF514	not-changed
COPB2	0.58957645655201	11.9062561247216	14.3984399258528	6.17856531530902e-39	7.36206000720716e-38	77.5767698155412	COPB2	not-changed
SLC2A1	-0.690173275004964	9.51752561247216	-14.3963697726023	6.3065909399109e-39	7.51017010865586e-38	77.556378070736	SLC2A1	not-changed
GUCY1B1	1.1240967389143	9.79308017817372	14.3936571015192	6.47836592392221e-39	7.71017328171167e-38	77.5296589294291	GUCY1B1	not-changed
RRN3P1	-1.29318116921853	9.28751893095768	-14.3929500163666	6.52390247321711e-39	7.75978747861534e-38	77.5226946193662	RRN3P1	down-regulated
CCNY	0.582306721018098	10.600280623608	14.3916450391098	6.60878348658309e-39	7.85611343590812e-38	77.5098418074343	CCNY	not-changed
LONP1	-0.777662557168432	10.3882694877506	-14.3848564180201	7.06843840909001e-39	8.39757140634435e-38	77.4429871272626	LONP1	not-changed
HRH2	-1.59293416186121	5.97878841870824	-14.3818404062603	7.28275278675802e-39	8.64708945428907e-38	77.4132890207872	HRH2	down-regulated
IGFBP7	0.919006522171397	13.2981737193764	14.3806479538015	7.36926413908961e-39	8.74465769912805e-38	77.4015477965496	IGFBP7	not-changed
ATXN7L3B	-0.639800894810099	11.0531380846325	-14.3746126114228	7.82309940160398e-39	9.27773570798458e-38	77.3421276160725	ATXN7L3B	not-changed
GPR20	-1.47608538476835	6.98422494432071	-14.3722011887263	8.01212957837003e-39	9.49632830273475e-38	77.3183888402674	GPR20	down-regulated
SGCB	0.871966454563539	10.002583518931	14.3713876444641	8.07692522390379e-39	9.56614595052216e-38	77.3103803957101	SGCB	not-changed
PCMT1	0.693733545436457	11.6454521158129	14.371342637785	8.08052505021539e-39	9.56614595052216e-38	77.309937359559	PCMT1	not-changed
TP53I11	-1.58378252137602	6.49240979955457	-14.3695057581272	8.22882012480612e-39	9.73598841174978e-38	77.2918559451357	TP53I11	down-regulated
MEX3D	-1.70344259296083	6.83408017817372	-14.3682817419648	8.329141490199e-39	9.84890449172446e-38	77.2798077563662	MEX3D	down-regulated
GRB2	-0.611479379598343	12.3356748329621	-14.3675162132061	8.39250398706709e-39	9.91801130616997e-38	77.2722727258876	GRB2	not-changed
ARHGAP45	-0.96045830184927	11.5049420935412	-14.3638397637088	8.7035656403028e-39	1.02795891549001e-37	77.2360878326214	ARHGAP45	not-changed
ZNF337	-0.991648439053495	8.93147216035635	-14.362614304872	8.80978540563606e-39	1.03989510282804e-37	77.2240272017246	ZNF337	not-changed
MRPL19	1.01807293696561	10.3563051224944	14.3604235665824	9.00290528124669e-39	1.06206889043426e-37	77.2024675025461	MRPL19	not-changed
VWA3A	-1.52627241996421	6.46687527839644	-14.3603029299046	9.01366157492409e-39	1.06271597083067e-37	77.2012803168937	VWA3A	down-regulated
DTX4	-1.02342071982502	9.57131625835189	-14.3593632439357	9.097886506871e-39	1.07194412899678e-37	77.1920329927415	DTX4	not-changed
SLC38A2	0.758141558958041	12.9867839643653	14.3593112892548	9.10256608721039e-39	1.07194412899678e-37	77.1915217201948	SLC38A2	not-changed
FUT6	-0.856626724995024	8.83104677060134	-14.3559466479949	9.41078911293839e-39	1.10759439174519e-37	77.1584126155315	FUT6	not-changed
PI4KA	-0.725576913899388	10.0374432071269	-14.3542640139667	9.56881212442298e-39	1.1255357131884e-37	77.1418560565969	PI4KA	not-changed
PRKAG3	-1.70148355537881	6.14512026726058	-14.3501553268088	9.96588643239497e-39	1.17155822952487e-37	77.1014309625003	PRKAG3	down-regulated
BTF3L4	0.767339948299867	11.2656659242762	14.3497832140437	1.00026499892183e-38	1.17519479273094e-37	77.0977699819939	BTF3L4	not-changed
SCOC	1.00819536687214	11.4007973273942	14.3486830436551	1.01121363968793e-38	1.18736623120258e-37	77.0869463119801	SCOC	not-changed
OSBP	-0.506139789222516	9.89253229398664	-14.3474305387768	1.02382385407726e-38	1.20147338312291e-37	77.0746243228456	OSBP	not-changed
ALG3	-0.758558818850668	9.59357461024499	-14.3462241108013	1.03611844168333e-38	1.21519394431516e-37	77.0627560096409	ALG3	not-changed
PPP1R37	-1.45030928614039	6.66827616926503	-14.3451921591955	1.04675174299121e-38	1.22695127270034e-37	77.0526044126414	PPP1R37	down-regulated
CYP8B1	-1.33763249154902	6.7066859688196	-14.3447684008261	1.05114964018918e-38	1.23139034839361e-37	77.0484358612982	CYP8B1	down-regulated
EIF4H	-0.816921117518389	12.5239710467706	-14.3437907776495	1.06136615359638e-38	1.24263664475358e-37	77.0388190634408	EIF4H	not-changed
ZDHHC2	0.956903102008361	10.5888485523385	14.3407669626694	1.09359727011039e-38	1.27962940004037e-37	77.0090755861753	ZDHHC2	not-changed
IP6K1	-1.06307975740704	8.82850779510022	-14.3361033138324	1.14523177762569e-38	1.33927017799951e-37	76.9632065976026	IP6K1	not-changed
MRPL40	0.693499642075951	11.4762427616926	14.3290613001862	1.22784289285235e-38	1.43504582972731e-37	76.8939558726224	MRPL40	not-changed
FAM234B	-1.02443195466295	8.03619599109131	-14.3288519314325	1.23038796505845e-38	1.43718724006625e-37	76.8918971468914	FAM234B	not-changed
DVL2	-0.511212984688814	9.82193986636971	-14.3269602575102	1.25362288744865e-38	1.46347950398682e-37	76.8732967992592	DVL2	not-changed
SIGLEC6	-1.21814203619009	7.32325389755011	-14.3240160086396	1.29065995882808e-38	1.50584464293593e-37	76.8443485677261	SIGLEC6	down-regulated
PLIN5	-1.62078560349971	7.39083741648107	-14.3238873383999	1.29230322038218e-38	1.50688983378399e-37	76.8430835159541	PLIN5	down-regulated
SIPA1L3	-1.02295172002387	8.82103340757238	-14.3229531957342	1.30429599283821e-38	1.51999488506423e-37	76.833899399085	SIPA1L3	not-changed
LSM5	0.98285140186918	12.9126414253898	14.322595206684	1.30892131752183e-38	1.52450391002644e-37	76.8303798530844	LSM5	not-changed
PHF14	0.788578902366257	10.9154142538976	14.3225308351272	1.30975475082294e-38	1.52459385284881e-37	76.8297469917957	PHF14	not-changed
GTSE1	-0.842323066215959	10.6719109131403	-14.3205998578774	1.3350031544671e-38	1.55308705119511e-37	76.8107633113458	GTSE1	not-changed
SMDT1	0.723787472658573	12.8910400890869	14.3183538281992	1.36498235202032e-38	1.58704782001624e-37	76.7886835097845	SMDT1	not-changed
SMG5	-0.674407118711475	9.4846570155902	-14.3154154441107	1.40521898071937e-38	1.63288875333044e-37	76.759799402267	SMG5	not-changed
SLC7A9	-1.58001813481805	6.66961247216036	-14.3153354504248	1.40633075589678e-38	1.63323930700662e-37	76.759013100883	SLC7A9	down-regulated
PSG4	-1.51597023265063	6.66019821826281	-14.311863115426	1.45544533882787e-38	1.68930532389803e-37	76.7248832127454	PSG4	down-regulated
KRTAP8-1	-1.15163630940545	7.30358129175947	-14.3075292033751	1.51915343571527e-38	1.76223546705728e-37	76.6822891390869	KRTAP8-1	not-changed
KLHL8	0.799883674686811	9.78819376391982	14.3070056098111	1.5270361516093e-38	1.77036088859086e-37	76.6771435407266	KLHL8	not-changed
PHF12	-0.933722529329886	9.43518262806236	-14.3067196714856	1.53135817070566e-38	1.77363140101193e-37	76.6743335209942	PHF12	not-changed
RNF187	-0.714233764167831	11.0461559020045	-14.3067025983298	1.53161662078358e-38	1.77363140101193e-37	76.6741657375562	RNF187	not-changed
MMS19	-0.603195466295487	10.1470400890869	-14.3060741133311	1.54116084175543e-38	1.78365922678709e-37	76.6679894637144	MMS19	not-changed
RHBDD2	-0.787846868164637	9.71663251670379	-14.3046811124116	1.56252703829169e-38	1.8073498347102e-37	76.6543004682739	RHBDD2	not-changed
FNDC5	-1.38136864187712	7.05181514476615	-14.3015094349326	1.61228362440564e-38	1.86383315089691e-37	76.6231343061847	FNDC5	down-regulated
NPTN	0.654001272618821	12.7299576837416	14.2959334591502	1.70361995747874e-38	1.96829122995581e-37	76.5683488135013	NPTN	not-changed
CAAP1	0.813564625173987	11.0822249443207	14.2938069559896	1.7397965314997e-38	2.00893687695106e-37	76.5474574395896	CAAP1	not-changed
EMCN	1.36510077550209	8.13232071269488	14.2934193560933	1.74647255507403e-38	2.01549130983672e-37	76.5436496728016	EMCN	up-regulated
VDAC1	-0.67353211374029	12.5581336302895	-14.2920454235333	1.77034365587669e-38	2.04187062048798e-37	76.5301525221128	VDAC1	not-changed
KATNBL1	0.915526267647639	9.90514476614699	14.2916129085779	1.77792543250373e-38	2.04944280415711e-37	76.5259037098252	KATNBL1	not-changed
CETN1	-1.68526050904752	6.22383964365256	-14.2899846039919	1.80676042697782e-38	2.08149125533142e-37	76.5099084850516	CETN1	down-regulated
CDKN2AIP	0.696922250944519	9.55541870824053	14.2856061669874	1.88663080218461e-38	2.17226519719269e-37	76.466901435746	CDKN2AIP	not-changed
MEI1	-0.974012865380791	8.96459242761693	-14.2846107176669	1.90527536880397e-38	2.19248040584799e-37	76.4571243568965	MEI1	not-changed
IL2RG	-1.18606116524161	12.11070155902	-14.2845097042227	1.90717757054587e-38	2.19341739873219e-37	76.4561322398742	IL2RG	not-changed
DPH3	0.914807059057466	10.2918062360802	14.2802483331744	1.98917342539819e-38	2.2864153608582e-37	76.4142810095438	DPH3	not-changed
DNPH1	-0.664345655199845	10.6700311804009	-14.2786503546847	2.02081961440835e-38	2.32146690860893e-37	76.398588354639	DNPH1	not-changed
ST3GAL1	-1.40100586597733	9.41496213808463	-14.2779636094485	2.03457364830743e-38	2.33593618015525e-37	76.3918445011416	ST3GAL1	down-regulated
NME9	-1.46714283157686	6.23304454342984	-14.2773804710561	2.04632593489029e-38	2.34809204173723e-37	76.3861181646225	NME9	down-regulated
GNL1	-0.666109604295096	8.99702449888641	-14.2762109305117	2.07010074594093e-38	2.37402168025683e-37	76.3746337062339	GNL1	not-changed
SF3B4	-0.742250347981713	11.1500623608018	-14.2730580998163	2.1355739070844e-38	2.44771492556729e-37	76.3436758251	SF3B4	not-changed
DERL2	0.691628216345201	10.9601848552339	14.2684104481409	2.23587394265508e-38	2.56121900896983e-37	76.2980448636694	DERL2	not-changed
CNOT9	-0.495947703320731	10.7393474387528	-14.2679246569453	2.24662518690224e-38	2.57207327615764e-37	76.2932756545848	CNOT9	not-changed
ZGPAT	-0.89145529926426	9.16381291759465	-14.2668228176331	2.27120193422865e-38	2.59873451736572e-37	76.282458677419	ZGPAT	not-changed
NRSN2	-1.67021332272818	7.00449220489978	-14.2662434829777	2.28423148458115e-38	2.61216057632675e-37	76.276771358944	NRSN2	down-regulated
EFCAB7	0.756658938158687	8.52534966592428	14.2584173798689	2.46772745660273e-38	2.82039984424987e-37	76.1999511428079	EFCAB7	not-changed
AQP2	-1.0129099224498	7.64572160356347	-14.2530080527091	2.60308025562678e-38	2.97341082343861e-37	76.1468630141389	AQP2	not-changed
FBXO30-DT	1.40085416583813	6.21999109131403	14.2521133765164	2.62616989192225e-38	2.99808670390965e-37	76.1380832285375	FBXO30-DT	up-regulated
FBXO7	-0.478780552793804	11.8026614699332	-14.250729692474	2.66228264546979e-38	3.03759368507733e-37	76.1245050381574	FBXO7	not-changed
XRCC3	-1.64469624179757	7.08635189309577	-14.2488852691478	2.71119149399711e-38	3.09164772118075e-37	76.1064063521671	XRCC3	down-regulated
INTS6L	-0.957546033008546	9.79795991091314	-14.2482927794945	2.72709201429214e-38	3.10693557186274e-37	76.1005926440592	INTS6L	not-changed
ZNF582	-0.677193676675278	8.37821826280624	-14.2482709301332	2.72768015584398e-38	3.10693557186274e-37	76.1003782525053	ZNF582	not-changed
KRT77	-1.87975319148936	5.10483518930958	-14.2464527990537	2.77706651689002e-38	3.16140248712703e-37	76.082538716592	KRT77	down-regulated
ENDOV	-1.06209743487771	7.54112917594655	-14.2457615948721	2.79607496986745e-38	3.18124534240958e-37	76.0757568333625	ENDOV	not-changed
ITPKC	-0.848422052097831	8.24275723830735	-14.2436515040046	2.85490998629881e-38	3.24635308707108e-37	76.0550540367264	ITPKC	not-changed
SRF	-1.0143315370849	8.72441425389755	-14.2420697894072	2.89982068209899e-38	3.29556283944745e-37	76.0395360718293	SRF	not-changed
ABCC10	-0.877027699343802	9.71104677060134	-14.2410965286913	2.92780460261869e-38	3.3254911883603e-37	76.0299878797151	ABCC10	not-changed
ELF1	0.799987432889248	11.7736815144766	14.2338655777799	3.14432412069286e-38	3.56940983092842e-37	75.9590562123385	ELF1	not-changed
C19orf84	-1.08781690196858	5.64977728285078	-14.2314922524479	3.21881437619774e-38	3.65191427341152e-37	75.9357781551612	C19orf84	not-changed
PACS1	-0.830849393517596	9.65887305122494	-14.2286278280108	3.31106616291459e-38	3.75446596797081e-37	75.9076852508816	PACS1	not-changed
E2F1	-0.746433485782461	8.79534521158129	-14.2246994103782	3.44188786555894e-38	3.90061277445384e-37	75.8691606857984	E2F1	not-changed
SRCAP	-1.32860483197455	7.40346102449889	-14.2232139956831	3.49268647614324e-38	3.95595798008561e-37	75.8545948112392	SRCAP	down-regulated
ZNF566	1.21450049711672	6.87280623608018	14.2220596636353	3.53267838095882e-38	3.99900779553682e-37	75.8432759076439	ZNF566	up-regulated
KRTAP4-2	-1.66047749055478	6.74834521158129	-14.2074687225641	4.07934568495302e-38	4.61524626006385e-37	75.7002331473377	KRTAP4-2	down-regulated
MRPL52	0.873008152714251	11.2757906458797	14.2062707942306	4.12780941366558e-38	4.66745740823959e-37	75.6884916898375	MRPL52	not-changed
ZBTB9	-0.722101034002781	8.72004454342984	-14.2030237413263	4.26208024510287e-38	4.81658070748424e-37	75.656667689642	ZBTB9	not-changed
SLC26A6	-1.40163692583017	7.56204008908686	-14.2028486217493	4.26944426468253e-38	4.82219976584114e-37	75.6549514408048	SLC26A6	down-regulated
OR51M1	-1.5764482402068	5.49793095768374	-14.2024185872206	4.28758169627986e-38	4.83997394057661e-37	75.6507369474464	OR51M1	down-regulated
DXO	-0.903654603300854	9.26753897550111	-14.2003445858022	4.37614106119537e-38	4.93717850782092e-37	75.6304116661168	DXO	not-changed
SFR1	0.855122390137209	10.3502873051225	14.1974387294579	4.50329729291154e-38	5.07779511870188e-37	75.6019360749083	SFR1	not-changed
RTL9	-1.61056683237224	6.20546102449889	-14.1963798059688	4.55054477793107e-38	5.1282019713733e-37	75.5915598311532	RTL9	down-regulated
LSP1	-1.37775362895209	10.3388530066815	-14.1887138342173	4.90765702249783e-38	5.52755716371948e-37	75.5164508132107	LSP1	down-regulated
TAZ	-0.868380672101809	9.2811425389755	-14.1883045171823	4.92749190358355e-38	5.54679867493847e-37	75.5124408746764	TAZ	not-changed
POMGNT1	-0.741973990853058	8.5770579064588	-14.1849805125891	5.09155747044638e-38	5.72828628134316e-37	75.4798783719732	POMGNT1	not-changed
CACYBP	0.751802246967594	12.6374476614699	14.1780170194239	5.4531339178761e-38	6.13165827765199e-37	75.4116722473236	CACYBP	not-changed
LINC01568	-1.81819365679061	5.64563919821826	-14.1779029986776	5.45926268254705e-38	6.13512792323473e-37	75.4105555413776	LINC01568	down-regulated
ENO2	-1.62653827798767	9.13404454342984	-14.1776926219355	5.47058874480747e-38	6.14443118017067e-37	75.4084951449797	ENO2	down-regulated
LTO1	-1.49468146748857	6.86490645879733	-14.1772635275574	5.49376261569018e-38	6.16702383602058e-37	75.4042926988979	LTO1	down-regulated
RYK	0.781441539073382	9.96885077951002	14.1754965973003	5.59022441447923e-38	6.27181493713499e-37	75.3869883239209	RYK	not-changed
LPCAT4	-1.23092461722012	8.47071046770601	-14.1663696427543	6.11604885577142e-38	6.85793442609608e-37	75.297616881403	LPCAT4	down-regulated
NXPH3	-1.68646490355936	6.42280178173719	-14.1639953946027	6.26073832502944e-38	7.01627267209108e-37	75.2743717641283	NXPH3	down-regulated
FBF1	-1.08779779280176	8.21979064587973	-14.1554855932303	6.80795302063239e-38	7.62528560272053e-37	75.1910686336423	FBF1	not-changed
TUBB	-0.865753887452769	13.8067817371938	-14.1544316688359	6.87896252181534e-38	7.70054211006769e-37	75.1807530144741	TUBB	not-changed
RNF126	-0.893662159475047	9.58674832962138	-14.1537140917133	6.92773239654788e-38	7.75083312135415e-37	75.1737296689184	RNF126	not-changed
RXYLT1	0.667031338238218	10.3684743875278	14.15330118182	6.95595181459115e-38	7.77808899245547e-37	75.1696883408352	RXYLT1	not-changed
CEP57	0.736743766156295	11.2774365256125	14.1518894455787	7.05330266358257e-38	7.88257400224435e-37	75.1558714070231	CEP57	not-changed
TOM1L2	-0.773092404056472	8.32516258351893	-14.1505407456241	7.14757547001097e-38	7.98350521057569e-37	75.1426719138898	TOM1L2	not-changed
NAXD	-0.798467369258303	10.3184855233853	-14.1477749089688	7.34485385066539e-38	8.1993133157954e-37	75.1156046548012	NAXD	not-changed
WDR83	-0.855363094054487	8.26900222717149	-14.1476072347094	7.35698661397208e-38	8.20831251379586e-37	75.113963812218	WDR83	not-changed
AK3	0.688369775303231	12.4904743875278	14.1454143904038	7.51751113349368e-38	8.38277333862644e-37	75.0925055549157	AK3	not-changed
ENTR1	-0.767879896599725	9.61233630289532	-14.1433544361608	7.67148800609372e-38	8.54974404040108e-37	75.0723488644312	ENTR1	not-changed
TAC3	-1.22873161662358	7.54767483296214	-14.1401504461984	7.91725270663084e-38	8.81876971372289e-37	75.0409999979952	TAC3	down-regulated
ZRANB1	0.494976754822028	9.6613429844098	14.1378490876448	8.09861110024147e-38	9.01579781291929e-37	75.0184844467229	ZRANB1	not-changed
WDTC1	-0.73712594949294	9.91929621380846	-14.1372310906514	8.14801405386415e-38	9.06578980904829e-37	75.0124384560613	WDTC1	not-changed
SFT2D1	0.787428932193276	12.7316236080178	14.1306080704138	8.69670672736671e-38	9.67094894266079e-37	74.947650462491	SFT2D1	not-changed
KCTD18	0.634646589779271	10.1852138084633	14.1234594454182	9.33036044851822e-38	1.03698675304617e-36	74.8777339533727	KCTD18	not-changed
LYPD4	-1.66191501292503	5.53439198218263	-14.1177909758527	9.86537711230478e-38	1.09584500254092e-36	74.8223036404512	LYPD4	down-regulated
GGN	1.83653276993438	4.05403340757238	14.1151465190474	1.01253339561079e-37	1.12410164035843e-36	74.7964471946576	GGN	up-regulated
BLZF1	1.14341660369855	8.42054788418708	14.114801332186	1.0159766942942e-37	1.12730358468164e-36	74.7930722324487	BLZF1	not-changed
ZFAND3	-0.66951091668323	9.94407572383074	-14.1031689956599	1.13909712027585e-37	1.26321985928941e-36	74.6793590909042	ZFAND3	not-changed
C5orf24	0.579618969974149	11.361991091314	14.1018435900197	1.15403782784012e-37	1.27908502732736e-36	74.6664047396475	C5orf24	not-changed
CTC1	-0.969001610658177	8.6618574610245	-14.1013528624016	1.15961901936091e-37	1.28456478293052e-36	74.6616085474993	CTC1	not-changed
RPS15A	0.620314018691586	15.48885077951	14.0992424670812	1.1839296034883e-37	1.31077455990816e-36	74.6409830495449	RPS15A	not-changed
POLR1D	0.936076416782656	12.5059265033408	14.098147506588	1.19674253136485e-37	1.32423305021113e-36	74.630282156146	POLR1D	not-changed
RPS21	0.611744203619011	15.6501024498886	14.0957458297348	1.22533266618799e-37	1.35512517186045e-36	74.6068120322589	RPS21	not-changed
DYNLL1	0.559070093457933	14.1354610244989	14.0934163100925	1.25371439178385e-37	1.38575306210275e-36	74.5840485311298	DYNLL1	not-changed
NAT9	-0.597003599125074	9.39032739420935	-14.0903632256457	1.29190664102985e-37	1.4271851939618e-36	74.5542167296037	NAT9	not-changed
LBP	-1.71793839729568	6.30745211581292	-14.0896150320044	1.30144175779356e-37	1.43693139533823e-36	74.5469064825497	LBP	down-regulated
ACSS2	-0.865095506064822	8.69813808463252	-14.0875302799362	1.32838205887783e-37	1.46587360093245e-36	74.5265381448094	ACSS2	not-changed
GPRC5D	-1.59312563133824	6.89412694877506	-14.0862277905187	1.34549507373015e-37	1.48394563355983e-36	74.5138132206111	GPRC5D	down-regulated
UBE2I	-0.621367945913702	12.7003830734967	-14.0849668879358	1.36227109545942e-37	1.50162643824808e-36	74.5014950202906	UBE2I	not-changed
AGPAT3	-1.05159990057666	10.258583518931	-14.0818595959091	1.40450869834348e-37	1.547338790563e-36	74.4711406126417	AGPAT3	not-changed
KAT7	-0.73780101411811	9.629	-14.0817948445078	1.40540262024728e-37	1.54747800255628e-36	74.4705080989233	KAT7	not-changed
C6orf89	-0.670492145555771	9.44456124721604	-14.0802354590387	1.42710283639623e-37	1.57051420767382e-36	74.4552758308642	C6orf89	not-changed
KMT5A	-0.773994651024065	10.4262048997773	-14.0798548831713	1.43244941254769e-37	1.57553805817643e-36	74.4515584182891	KMT5A	not-changed
GPS2	-0.709671982501485	10.4347216035635	-14.07705431987	1.47241276443543e-37	1.61861034589873e-36	74.4242040980141	GPS2	not-changed
REEP4	-0.676312487572083	9.57080846325167	-14.0745562111071	1.50899739403674e-37	1.65792351287056e-36	74.3998057600756	REEP4	not-changed
RIDA	1.10653543448003	9.75203786191537	14.0728359802817	1.53471572689441e-37	1.68526164324174e-36	74.3830057157637	RIDA	not-changed
UBN2	-0.871238695565717	8.8972271714922	-14.070509247322	1.57019839262832e-37	1.72328632519214e-36	74.3602837418294	UBN2	not-changed
JUNB	-1.05818783058262	10.2496904231626	-14.0625911150761	1.6971926276627e-37	1.86164856182305e-36	74.2829692360436	JUNB	not-changed
CLCN7	-0.780712726188112	10.3415902004454	-14.0590421653409	1.7573879754033e-37	1.92662854660718e-36	74.248321934558	CLCN7	not-changed
COA5	0.825652396102599	11.1178329621381	14.0562463016268	1.80630539009602e-37	1.97918059618076e-36	74.2210291699179	COA5	not-changed
KCTD12	0.934748816862198	12.3923363028953	14.0547869723477	1.83237528343282e-37	2.00665497497496e-36	74.2067842731827	KCTD12	not-changed
MTHFSD	-0.96836369059455	7.67599554565702	-14.0531006562714	1.86296776970457e-37	2.03904957681942e-36	74.1903244140816	MTHFSD	not-changed
RPL27	0.572648120898791	15.503013363029	14.0525204859626	1.87361032743643e-37	2.04958533974204e-36	74.1846616427116	RPL27	not-changed
ARTN	-1.51279620202823	6.97829398663697	-14.0517309542137	1.88819084132657e-37	2.06441516008595e-36	74.1769555380434	ARTN	down-regulated
AFG3L1P	-0.980141797574076	9.43254788418708	-14.0505093001668	1.91097479023216e-37	2.08819310275722e-36	74.1650321009273	AFG3L1P	not-changed
CLTB	-0.751307019288122	10.2205968819599	-14.0490479869228	1.93858879017259e-37	2.11722040079466e-36	74.1507701009188	CLTB	not-changed
MCUR1	0.746236488367469	11.1137438752784	14.048689948394	1.94541500899796e-37	2.12352528405024e-36	74.1472758350577	MCUR1	not-changed
LOC283045	-0.742174468085105	8.22244320712695	-14.0479344993873	1.95989684322614e-37	2.13707349613661e-36	74.139903167616	LOC283045	not-changed
OR2S2	-1.41592839530722	6.5152583518931	-14.0479318991349	1.95994687483587e-37	2.13707349613661e-36	74.1398777911913	OR2S2	down-regulated
PARVB	-1.20048852654604	9.29332739420935	-14.0392654310628	2.13397901615085e-37	2.32557572673607e-36	74.0553100089842	PARVB	down-regulated
KDM1A	-0.879169616225893	9.94029398663697	-14.0392000732282	2.13534836712369e-37	2.32581082817832e-36	74.0546723214808	KDM1A	not-changed
AZIN1	0.711744263273019	12.1814788418708	14.0390951108432	2.13754933050828e-37	2.3269509747504e-36	74.0536482201845	AZIN1	not-changed
IFNAR2	0.776876794591372	10.4907772828508	14.0376919497343	2.16719050151359e-37	2.35794536972561e-36	74.039958086736	IFNAR2	not-changed
MYT1	-1.34492352356334	6.63448329621381	-14.0343543336379	2.23935364968638e-37	2.43514611280082e-36	74.0073963199649	MYT1	down-regulated
CD34	-1.25906756810499	8.07917371937639	-14.0311958094524	2.309849936314e-37	2.51045199816854e-36	73.9765845515648	CD34	down-regulated
FBLL1	-1.66156233843707	6.14301113585746	-14.0281645216569	2.37958651823951e-37	2.58485149753377e-36	73.9470165313239	FBLL1	down-regulated
RTF2	-0.593304116126466	11.1736948775056	-14.0243088274252	2.47133075267247e-37	2.68306404440656e-36	73.9094106230809	RTF2	not-changed
GARS1-DT	-0.98805583615033	8.66293763919822	-14.0218695310709	2.53118558469658e-37	2.74656795334057e-36	73.8856214125053	GARS1-DT	not-changed
PGPEP1	-0.873677808709492	8.27873273942093	-14.0213118764487	2.54507093679437e-37	2.76014928223299e-36	73.8801831188586	PGPEP1	not-changed
RAB6B	-1.57547116723006	7.32063919821826	-14.0208531672204	2.55654951196102e-37	2.77110724250786e-36	73.8757098121133	RAB6B	down-regulated
UBE2E1	0.655679439252332	13.4349064587973	14.0206201358289	2.56240056627177e-37	2.77595689503521e-36	73.8734373249004	UBE2E1	not-changed
FBXW12	-1.07312248956054	9.82561915367483	-14.0202026591994	2.57291616337675e-37	2.78585192104396e-36	73.8693661922422	FBXW12	not-changed
FRS3	-0.948869198647841	7.81327839643653	-14.0198791931253	2.58109335814291e-37	2.79320575381208e-36	73.8662118606762	FRS3	not-changed
C1QTNF1	-1.14281276595745	7.89213140311804	-14.018046723436	2.62790972386786e-37	2.84234377376073e-36	73.8483427736942	C1QTNF1	not-changed
RPL36	0.782035414595343	14.6231380846325	14.0172503216511	2.64851946447522e-37	2.86309924521635e-36	73.8405770509347	RPL36	not-changed
CA2	1.62734259296083	8.53924944320713	14.0168397849905	2.65920644669922e-37	2.87311153118451e-36	73.8365739706669	CA2	up-regulated
INSYN1	-1.48103887452774	6.74124276169265	-14.0143594927676	2.72469366202273e-37	2.94228971183932e-36	73.8123899945642	INSYN1	down-regulated
KRI1	-0.722202246967584	9.37906013363029	-14.0140384483927	2.7332869264316e-37	2.94998917150897e-36	73.809259788299	KRI1	not-changed
SMARCA5	0.614453131835365	11.5391893095768	14.013531017775	2.74692426535928e-37	2.96312146141832e-36	73.8043123596203	SMARCA5	not-changed
NRDE2	-0.816743109962221	7.99829844097996	-14.0123639912833	2.77854645114258e-37	2.99562967922382e-36	73.7929341627025	NRDE2	not-changed
FLJ40288	-1.50148596142375	6.85160801781737	-14.0121746231806	2.78371176160937e-37	2.99819243070425e-36	73.7910879091605	FLJ40288	down-regulated
COX6B1	0.636064008749258	13.3742383073497	14.0121678115288	2.7838977383455e-37	2.99819243070425e-36	73.7910214988114	COX6B1	not-changed
ZBED6	1.81402010340028	6.71850779510022	14.0094733587831	2.85844403447604e-37	3.07683343187781e-36	73.7647528625861	ZBED6	up-regulated
MDC1	-0.726634957247978	9.70334743875278	-14.0092580200047	2.86448692453812e-37	3.08169268333047e-36	73.7626535768167	MDC1	not-changed
NFE2L2	0.719200576655391	12.1074922048998	14.0080185753012	2.89951703783471e-37	3.11771535998857e-36	73.7505707750076	NFE2L2	not-changed
LRRC40	0.73416544044542	11.4385523385301	14.0074424304539	2.91594559688569e-37	3.13370891145056e-36	73.744954334438	LRRC40	not-changed
SNAPC1	1.20562670511037	10.0600534521158	14.0072311321862	2.92199392538667e-37	3.13853593658608e-36	73.7428945553431	SNAPC1	up-regulated
C1RL-AS1	-1.27834621197057	7.16471714922049	-14.0066542177081	2.93857165776696e-37	3.15466151183385e-36	73.7372707359335	C1RL-AS1	down-regulated
POR	-0.952351958639888	8.60222271714922	-14.0062783974706	2.94942132973846e-37	3.16462391851289e-36	73.7336072518312	POR	not-changed
MAP1LC3A	-1.01506645456353	9.51981291759465	-14.0040729174531	3.01390189859815e-37	3.23208915838496e-36	73.712109075888	MAP1LC3A	not-changed
BAIAP2	-0.928838516603695	7.37451893095768	-14.0026202566582	3.05713860084621e-37	3.27671298945563e-36	73.697949817819	BAIAP2	not-changed
LYSMD2	1.2383652614834	12.2935167037862	14.0007723374416	3.1130346855385e-37	3.33485081270678e-36	73.6799387599572	LYSMD2	up-regulated
MFSD4B	-1.24163111950686	7.50588418708241	-14.0001001912013	3.13361762836021e-37	3.35511763172439e-36	73.6733878035979	MFSD4B	down-regulated
ZKSCAN2	-1.34742030224697	7.12889755011136	-13.9996061463527	3.14883310666194e-37	3.36961912226175e-36	73.6685727600123	ZKSCAN2	down-regulated
NR3C1	0.711974806124489	12.5334142538976	13.9993157528866	3.15781093275071e-37	3.37743375146881e-36	73.6657425678665	NR3C1	not-changed
ALDOB	-1.47812694372638	7.08620935412027	-13.9991760058129	3.16214045677985e-37	3.38027114258423e-36	73.6643805926971	ALDOB	down-regulated
IFNA17	-1.56040530920661	7.29706236080178	-13.9973363363302	3.219690453346e-37	3.43996710280386e-36	73.6464516680709	IFNA17	down-regulated
USH1G	-1.34631395903758	7.46984187082405	-13.9972402600276	3.22272452194488e-37	3.4413850151976e-36	73.6455153596017	USH1G	down-regulated
UBE2Q2	0.75602175382779	10.8490289532294	13.994591878012	3.30749173470426e-37	3.53003392606525e-36	73.6197066308738	UBE2Q2	not-changed
ABCC1	-0.749880513024456	10.7485278396437	-13.9945081421012	3.31020783997678e-37	3.53106350591385e-36	73.6188906478667	ABCC1	not-changed
C2orf72	-1.2220076158282	7.32030512249443	-13.9943705125894	3.31467690154948e-37	3.53396092079001e-36	73.6175494909651	C2orf72	down-regulated
ZSCAN9	-1.27462594949294	7.96811581291759	-13.9917590547917	3.40062473709475e-37	3.62367839981856e-36	73.5921026248712	ZSCAN9	down-regulated
CD40	-0.891735116325311	11.3433518930958	-13.9916319784245	3.40486329192675e-37	3.62627833219943e-36	73.5908644003026	CD40	not-changed
ANKRD36	1.28611256711075	8.14498440979956	13.9912622902887	3.41722399415554e-37	3.63752127487697e-36	73.587262206162	ANKRD36	up-regulated
IRF4	-1.90158202425929	10.8306993318486	-13.9898406117548	3.4651768517616e-37	3.68661902418815e-36	73.5734098993497	IRF4	down-regulated
AP1M2	-1.60903634917479	5.10650111358575	-13.987971821206	3.52923289069586e-37	3.75278820196831e-36	73.5552019395156	AP1M2	down-regulated
MRPL57	0.732879160866968	13.0001648106904	13.9821553625452	3.73625684845009e-37	3.97083154041129e-36	73.4985372557121	MRPL57	not-changed
SLC25A20	-0.608197494531703	9.70734966592428	-13.9792748468319	3.84322228394632e-37	4.08236061468081e-36	73.4704783305759	SLC25A20	not-changed
C2orf69	0.589750526943721	11.3913986636971	13.9776730115369	3.90402066381844e-37	4.14475832560524e-36	73.4548759351019	C2orf69	not-changed
LINC00960	-1.68499222509445	6.38608240534521	-13.9751560398717	4.00149670054981e-37	4.24600920946235e-36	73.4303612343217	LINC00960	down-regulated
MOAP1	0.596669954265266	11.1381135857461	13.9746668841074	4.02072026903273e-37	4.26416314276533e-36	73.4255971758678	MOAP1	not-changed
RP9P	-0.680682461722016	9.88395545657016	-13.9700976332583	4.20479690720089e-37	4.45704050715443e-36	73.3810988176171	RP9P	not-changed
ZGLP1	-1.45898363491747	7.24074610244989	-13.967652588375	4.30672508318245e-37	4.5626844141903e-36	73.3572897206452	ZGLP1	down-regulated
UPF2	-0.667954404454173	10.3690601336303	-13.9670917702407	4.33044950239405e-37	4.58540926563899e-36	73.3518288769963	UPF2	not-changed
ADAMTSL4	-1.39378574269239	7.43836080178174	-13.9661357972201	4.37119104248109e-37	4.62611982191398e-36	73.3425204982644	ADAMTSL4	down-regulated
ATRAID	0.64748745277392	12.3112360801782	13.9650764644797	4.41678413749508e-37	4.67191946464e-36	73.3322059914766	ATRAID	not-changed
FBXO28	0.728966812487569	10.4677171492205	13.9631929394459	4.49902429021018e-37	4.75641472023741e-36	73.3138672535112	FBXO28	not-changed
PDGFC	1.35590691986479	9.58777282850779	13.9627279886386	4.51955928507535e-37	4.77562026972768e-36	73.3093404601713	PDGFC	up-regulated
TRIM46	-1.32460745675084	7.59591091314031	-13.9620731460523	4.54863964336054e-37	4.80383047929763e-36	73.3029649680115	TRIM46	down-regulated
SZRD1	-0.634452256909926	10.2617639198218	-13.96148313756	4.57500059119774e-37	4.82914067639465e-36	73.2972207960156	SZRD1	not-changed
DIDO1	-0.874279021674285	9.65551002227171	-13.9610652727633	4.5937624426399e-37	4.84640735772177e-36	73.2931526289375	DIDO1	not-changed
RPL7	0.566675084509837	15.80629844098	13.9604454645344	4.62173281314434e-37	4.87336586013615e-36	73.2871185085133	RPL7	not-changed
DCUN1D4	0.815943229270223	8.96455011135857	13.9587613888658	4.69859141446179e-37	4.94989786831468e-36	73.2707237844241	DCUN1D4	not-changed
DHX16	-0.631387532312585	10.3308841870824	-13.9587476529751	4.69922351071588e-37	4.94989786831468e-36	73.270590066715	DHX16	not-changed
STXBP5L	-1.82318787035196	5.92860356347439	-13.9568532254292	4.78721829455551e-37	5.03995342227330e-36	73.2521484752559	STXBP5L	down-regulated
PRR14L	1.43609697753032	7.17264365256125	13.9556723729391	4.84289735149452e-37	5.09591093441968e-36	73.2406537874557	PRR14L	up-regulated
CCDC90B	0.634265360906751	11.3493853006682	13.9495438578714	5.14240774999805e-37	5.40824635616645e-36	73.1810035857883	CCDC90B	not-changed
RPL32	0.64767629747465	15.5454409799555	13.949354610063	5.15194487261271e-37	5.41545154206177e-36	73.1791617593222	RPL32	not-changed
PRRC2B	-1.43869644064428	9.68515144766147	-13.9489320059715	5.17330567609509e-37	5.43507116913774e-36	73.1750488627576	PRRC2B	down-regulated
IQSEC1	-1.16440817259893	9.8404855233853	-13.9441237205588	5.42265182681916e-37	5.69406684794277e-36	73.1282568023606	IQSEC1	not-changed
MORC2	-0.82737182342413	10.7767305122494	-13.9437117206617	5.44456654387885e-37	5.71298279797037e-36	73.124247701996	MORC2	not-changed
TMEM59	0.676131855239616	12.4684075723831	13.9436785739946	5.4463334843009e-37	5.71298279797037e-36	73.1239251594956	TMEM59	not-changed
RECQL5	-1.20020174985088	8.78019599109131	-13.9427181201094	5.49778121665717e-37	5.76395044768721e-36	73.1145793379282	RECQL5	down-regulated
DNAJB11	-0.72477158480811	11.4738908685969	-13.9418458950546	5.54492262778466e-37	5.81035265586105e-36	73.106092258912	DNAJB11	not-changed
WARS2-AS1	-0.861080990256494	7.71100890868597	-13.9396084281436	5.66770303426897e-37	5.93592524020242e-36	73.084321821037	WARS2-AS1	not-changed
BCL2L12	-0.903473613044342	9.38361247216036	-13.9389660736571	5.70345031055602e-37	5.97026280950778e-36	73.0780720001724	BCL2L12	not-changed
YEATS4	1.0435644263273	9.94046325167038	13.9382658849593	5.74267222576457e-37	6.00820003859053e-36	73.0712596081123	YEATS4	not-changed
CCS	-0.737854444223498	9.39966815144766	-13.9350361222608	5.92710163794318e-37	6.19794067025791e-36	73.039837817111	CCS	not-changed
CAMK2G	-0.806647922052088	9.12584187082405	-13.9342322774202	5.97391425896441e-37	6.24365398522455e-36	73.0320178003232	CAMK2G	not-changed
NPM1	0.510243766156298	15.2104832962138	13.9323891191832	6.08264874613778e-37	6.35400421610797e-36	73.014087739857	NPM1	not-changed
PIGP	0.640478683634917	11.0948062360802	13.9309626324341	6.16815511491948e-37	6.43998836208657e-36	73.0002116627536	PIGP	not-changed
TRIM56	-0.8831640485186	9.6581135857461	-13.927500141626	6.38072198774061e-37	6.65847494797301e-36	72.9665328000792	TRIM56	not-changed
FAM83A	-1.17374348777093	8.20061915367483	-13.9271937104453	6.39988240040358e-37	6.67501443737903e-36	72.9635523732003	FAM83A	not-changed
ZNF333	-1.06662231059854	7.13586191536748	-13.923717812769	6.62127996075052e-37	6.90235911523739e-36	72.929746735414	ZNF333	not-changed
TPT1-AS1	-1.41722282759992	7.40416481069042	-13.9135277769133	7.31532635595152e-37	7.62192737273068e-36	72.8306604949575	TPT1-AS1	down-regulated
HELZ2	-1.36951779677868	7.11199109131403	-13.9095939172426	7.60226800516175e-37	7.91680399029267e-36	72.7924159903421	HELZ2	down-regulated
SLC49A4	0.813622946907936	8.78018040089087	13.9055908013553	7.90578376149339e-37	8.22862707359155e-36	72.7535025952788	SLC49A4	not-changed
DKFZp451B082	-1.38868343607079	6.70083518930958	-13.9052617076869	7.93126663621598e-37	8.2508909521543e-36	72.7503037472581	DKFZp451B082	down-regulated
ACTN4	-1.12376172201233	11.0399220489978	-13.9038231388289	8.04362505962105e-37	8.36346182707685e-36	72.7363209596094	ACTN4	not-changed
MBTPS1	-0.729574726585794	10.0487505567929	-13.89708114159	8.59172237493311e-37	8.92874818561992e-36	72.6707968894459	MBTPS1	not-changed
IRGQ	-0.755924835951484	9.46648106904232	-13.8942966780536	8.82881204953356e-37	9.17041111440733e-36	72.6437389568587	IRGQ	not-changed
EXOC3L2	-0.808487870351952	8.78302449888641	-13.8941365968484	8.84263914554553e-37	9.18004365671182e-36	72.642183438637	EXOC3L2	not-changed
TACC3	-0.955113740306237	10.476714922049	-13.8934879374058	8.89888880352414e-37	9.23368487739837e-36	72.6358804507925	TACC3	not-changed
LINC00663	-1.33048128852654	6.94811135857461	-13.8930163954282	8.94000322821548e-37	9.2715743355994e-36	72.6312985770836	LINC00663	down-regulated
SIRT7	-0.637803778087099	10.1345367483296	-13.8886326867322	9.33140649136541e-37	9.67251857441738e-36	72.5887059710287	SIRT7	not-changed
NDUFA3	0.796309783257101	12.3279755011136	13.8885309974966	9.34068584474472e-37	9.67716173257442e-36	72.5877180105462	NDUFA3	not-changed
SNRPG	0.858894690793386	14.3333363028953	13.8878251765687	9.4053475342425e-37	9.73914800399913e-36	72.5808606956851	SNRPG	not-changed
CDKN1B	0.730868502684439	11.9024788418708	13.8819408643018	9.96208798812527e-37	1.03103519470531e-35	72.5236978038044	CDKN1B	not-changed
WDR59	-0.533123583217339	10.0108841870824	-13.8815518316527	1.00000333337458e-36	1.03443135988532e-35	72.5199189037642	WDR59	not-changed
LINC00685	-1.53011296480414	7.81495545657016	-13.8775927711103	1.03944825486703e-36	1.07468288545509e-35	72.481464652676	LINC00685	down-regulated
DPP6	-1.59641934778286	6.28165924276169	-13.8741725365453	1.07477146557379e-36	1.11063390658294e-35	72.4482475292136	DPP6	down-regulated
HPX	-1.36712865380792	6.68061915367483	-13.8640038569659	1.18701751851999e-36	1.22599693600828e-35	72.349509213316	HPX	down-regulated
CD3E	-1.58454951282562	9.07741870824053	-13.8635776445496	1.19196932764283e-36	1.23048098385085e-35	72.3453713044204	CD3E	down-regulated
GUCY1A1	1.25091616623584	9.26354120267261	13.860257739422	1.23125228278383e-36	1.27038266495419e-35	72.3131415478385	GUCY1A1	up-regulated
LIAS	1.14389057466692	8.03984187082405	13.8600394096995	1.23388046019619e-36	1.27244316920795e-35	72.3110221033993	LIAS	not-changed
ACOT13	0.79229103201431	10.9193452115813	13.8593287810223	1.24247355656094e-36	1.280649763488e-35	72.3041237398597	ACOT13	not-changed
DHX33	-0.90799343805925	9.98087527839644	-13.8592706380797	1.24317927052202e-36	1.28072239514534e-35	72.3035593287746	DHX33	not-changed
CBLL1	0.732946728971962	9.99493318485523	13.8584163722891	1.2535941745353e-36	1.2907922447807e-35	72.2952668222756	CBLL1	not-changed
EP300	-0.707127858421153	10.0237171492205	-13.8581209532665	1.25721602583892e-36	1.29386076043586e-35	72.2923991860944	EP300	not-changed
CCDC33	-1.03148572280771	7.59847661469933	-13.8554508438364	1.29042868674837e-36	1.32736391599663e-35	72.2664815105053	CCDC33	not-changed
SNX13	0.650096003181545	9.61734743875278	13.8513530366781	1.3431094347024e-36	1.38084800168461e-35	72.226709639513	SNX13	not-changed
DISP3	-1.41845772519388	6.76656347438753	-13.8495360721834	1.36714908389835e-36	1.40484672173672e-35	72.2090763314988	DISP3	down-regulated
ARF5	-0.767749830980323	10.8791046770601	-13.849013087035	1.37414770406743e-36	1.41131899448311e-35	72.2040010281615	ARF5	not-changed
ZBTB48	-1.36507283754226	8.63150111358575	-13.8462758133232	1.41136505120797e-36	1.44880503041772e-35	72.1774384406325	ZBTB48	down-regulated
TMPRSS15	-1.3016479220521	7.57091759465479	-13.8440428435278	1.44246871787839e-36	1.47998024535095e-35	72.155771193271	TMPRSS15	down-regulated
XKR8	-0.52084374627162	9.87730289532294	-13.8434275370907	1.45115897282328e-36	1.4881391684176e-35	72.149800916971	XKR8	not-changed
ANKRD10-IT1	-1.17131869158879	9.47853229398664	-13.8425754691108	1.4632793820426e-36	1.49980557302292e-35	72.1415335354088	ANKRD10-IT1	not-changed
SCART1	-1.7012885464307	5.9862004454343	-13.8400360917333	1.5000032008971e-36	1.53666486449626e-35	72.1168958654924	SCART1	down-regulated
LOC441086	-1.33497289719626	6.59253229398664	-13.8346986663739	1.58021462103673e-36	1.61801457464304e-35	72.0651167555566	LOC441086	down-regulated
ATG3	0.597949731556962	12.357574610245	13.8302533366116	1.65027376286582e-36	1.68889184432171e-35	72.0219981144606	ATG3	not-changed
CDC37	-0.848862577053099	10.4772962138085	-13.8299340995298	1.65542257727892e-36	1.69330160225877e-35	72.0189018050756	CDC37	not-changed
SLC6A16	-1.54239457148539	8.49232739420935	-13.8285767069177	1.67749472549728e-36	1.71500867955125e-35	72.0057366519869	SLC6A16	down-regulated
TMUB2	-0.628473076158278	9.1091158129176	-13.8212133908278	1.80244147898009e-36	1.84181564408097e-35	71.9343299809823	TMUB2	not-changed
DIMT1	0.620982839530722	11.9543184855234	13.8199092128246	1.8255199475328e-36	1.86445327569447e-35	71.9216841487128	DIMT1	not-changed
ANGEL1	-0.520304454165844	9.25943652561247	-13.8155379995862	1.90504218986421e-36	1.94468635897987e-35	71.8793026192898	ANGEL1	not-changed
OTUD5	-0.730633863591169	9.99154788418708	-13.8147657398401	1.91944611741752e-36	1.95839843994203e-35	71.8718156601028	OTUD5	not-changed
CIC	-1.09325517995625	9.15186191536748	-13.8140098216395	1.93365040610009e-36	1.97189306208316e-35	71.864487293436	CIC	not-changed
EPC2	0.645359872738119	9.96630289532294	13.8132493687873	1.94804565531099e-36	1.98556867829752e-35	71.8571151279499	EPC2	not-changed
RBM7	0.817335494134021	10.9251158129176	13.8118186315994	1.97541953684404e-36	2.01245241446754e-35	71.8432453737795	RBM7	not-changed
CPNE1	-0.921840007953868	10.5219821826281	-13.8116623007272	1.97843371642447e-36	2.01450515943605e-35	71.8417299168748	CPNE1	not-changed
POLE	-1.01114867766953	9.13431848552339	-13.8110955756658	1.98939910686592e-36	2.02464792496334e-35	71.8362361949222	POLE	not-changed
COCH	-0.840884410419562	9.83144766146993	-13.8029414056669	2.15404770369903e-36	2.19110775753159e-35	71.7572013317994	COCH	not-changed
MORF4L1	0.459588228275992	13.7673741648107	13.7975534194351	2.2702272762687e-36	2.3081216397808e-35	71.7049882368523	MORF4L1	not-changed
ACRV1	-1.11172215152117	6.96787305122494	-13.7972570427571	2.27679623570333e-36	2.31363351350881e-35	71.7021163927804	ACRV1	not-changed
TIRAP	-0.949916603698548	7.74767706013363	-13.7971947192265	2.27817999825067e-36	2.31387339771948e-35	71.7015124906015	TIRAP	not-changed
C6orf136	-0.72641433684629	9.76736748329621	-13.7967629554329	2.2877894570064e-36	2.32246340597714e-35	71.6973288186038	C6orf136	not-changed
CDK5RAP1	-0.534512308610072	9.79773719376392	-13.7953675164752	2.31912398545003e-36	2.35308800556911e-35	71.6838077620282	CDK5RAP1	not-changed
TMEM222	-0.585292523364485	9.90844097995546	-13.7951830323016	2.32329846923762e-36	2.35613784900904e-35	71.6820202504973	TMEM222	not-changed
TTC33	0.841075263471874	9.34782628062361	13.7910762093088	2.41819169814798e-36	2.45113940806241e-35	71.6422307566789	TTC33	not-changed
FUNDC1	0.804966673294885	10.465271714922	13.7885902631273	2.47750004398529e-36	2.50999388878329e-35	71.6181476684146	FUNDC1	not-changed
UBL5	0.824477331477432	12.79329844098	13.7862048391525	2.53577316370352e-36	2.56774097204554e-35	71.5950400599847	UBL5	not-changed
ZNF317	-0.560624159872734	9.76586636971047	-13.7856698620159	2.54902850469205e-36	2.57986765477391e-35	71.5898579571339	ZNF317	not-changed
TARDBP	-0.493804016703118	12.2983095768374	-13.7835841019759	2.60137126409277e-36	2.63152263198065e-35	71.5696548373037	TARDBP	not-changed
EP400	-0.776296301451577	9.35612917594655	-13.78142057498	2.65679815891886e-36	2.6862441164475e-35	71.5486997577971	EP400	not-changed
ATP13A2	-1.31573873533506	8.42889532293987	-13.7782788895985	2.73938716093755e-36	2.76836012790285e-35	71.5182729893352	ATP13A2	down-regulated
MID1	-1.27939838934182	7.73692204899777	-13.7764594588398	2.78838191862615e-36	2.81646131570249e-35	71.5006533508297	MID1	down-regulated
ATP6AP2	0.63645788427122	13.3486302895323	13.776405792008	2.78984028151071e-36	2.81652328069792e-35	71.5001336475533	ATP6AP2	not-changed
ZDHHC18	-0.707177490554789	9.42490200445434	-13.776247425454	2.79414822914402e-36	2.8194605829716e-35	71.4986000492855	ZDHHC18	not-changed
MAP4K4	-1.11566766752834	10.3989287305122	-13.7747293742427	2.8357808218072e-36	2.86003887686118e-35	71.4838998286076	MAP4K4	not-changed
[truncated: 18,162 more rows]
